# Supplementary material for: Identification of candidate regulatory elements controlling transcriptome during the formation of interphalangeal joints.
Source: Research Square preprint supplement (doi:10.21203/rs.3.rs-1413327/v1), 2022-03-21
Supplement: Supplementary file 1 [file 7082accd2aa66765636bf319.xlsx]

## Sheet: Supplementary_Table_9a_
#Supplementary_Table_9a_int_spec_GO-human_phenotype_Abnormality of joint mobility
CEs coordinates	Associated gene
chr1:33885740-33885908	GNS
chr1:34077751-34078009	LEMD3
chr1:49823117-49823396	EP300
chr1:52370244-52370732	LARGE1
chr1:56919584-56919618	BRAF
chr1:83220032-83220309	ZBTB20
chr1:83274452-83275339	ZBTB20
chr1:83285678-83286302	ZBTB20
chr1:83330917-83331253	ZBTB20
chr1:83525003-83525436	ZBTB20
chr1:83598304-83598630	ZBTB20
chr1:83607880-83608277	ZBTB20
chr1:111049230-111049279	CBS
chr1:118227923-118228093	IL1RAPL1
chr1:119384152-119384322	ARX
chr1:119433114-119433431	ARX
chr1:119463715-119463868	ARX
chr1:120500655-120501031	SMS
chr1:120502708-120503076	SMS
chr1:137362871-137363036	SLC5A7
chr1:137428519-137428606	SLC5A7
chr1:197131536-197131601	STIM1
chr10:1668843-1669033	TRIP4
chr10:4483351-4483583	HERC1
chr10:9578541-9578728	AP4E1
chr11:766700-766776	TBCD
chr11:3632036-3632957	SLC6A8
chr11:6026766-6027037	SALL1
chr11:6169758-6169929	SALL1
chr11:14472086-14472561	MAF
chr11:18492716-18492872	GALNS
chr11:18510982-18511165	GALNS
chr11:19721070-19721153	DHODH
chr12:9199776-9199927	FLNB
chr12:9203771-9203987	FLNB
chr12:19882735-19882973	IFT122
chr12:19885747-19885843	IFT122
chr13:16138377-16138508	PITX1
chr13:16142533-16142663	PITX1
chr14:2171583-2171729	FAM20C
chr14:12890481-12890932	CREBBP
chr15:389539-389668	PI4KA
chr15:6152620-6152762	VPS33A
chr15:9455266-9455482	ACADS
chr17:2302990-2303124	GLUL
chr17:5221613-5221763	DPM2
chr17:6513072-6513247	POMT1
chr17:7246599-7246711	MYMK
chr17:7247959-7248392	MYMK
chr17:7255605-7256162	MYMK
chr17:7259653-7259852	MYMK
chr17:7265694-7265832	ADAMTSL2
chr17:7270903-7271092	ADAMTSL2
chr17:7598213-7598587	COL5A1
chr17:7633380-7633622	COL5A1
chr17:7809539-7809737	COL5A1
chr17:10266954-10267232	LMX1B
chr17:10287069-10287442	LMX1B
chr17:10293313-10293577	LMX1B
chr17:10302821-10303061	LMX1B
chr17:10320912-10321168	LMX1B
chr17:10378885-10379283	LMX1B
chr17:10418366-10418675	LMX1B
chr18:8422482-8422779	KCNJ2
chr18:9543839-9544253	SGSH
chr18:10741808-10741905	SLC25A19
chr18:10750307-10750428	SLC25A19
chr19:926235-926689	ELN
chr19:1914672-1915343	AUTS2
chr19:1992212-1992416	AUTS2
chr19:5080126-5080244	GUSB
chr19:5890004-5890305	TNNT3
chr2:591809-592344	PLEC
chr2:2389693-2390078	IBA57
chr2:8779021-8779131	DNAJB6
chr2:8892459-8892794	DNAJB6
chr2:29440930-29441340	TWIST1
chr2:29490258-29490546	TWIST1
chr2:29555574-29555818	TWIST1
chr2:39334029-39334505	TGFBR2
chr2:39358502-39358826	TGFBR2
chr2:39781931-39782099	TGFBR2
chr2:50668206-50668294	GLI3
chr2:50700417-50700649	GLI3
chr2:50706261-50706675	GLI3
chr2:50719261-50719906	GLI3
chr2:50731870-50732424	GLI3
chr2:50738126-50738258	GLI3
chr2:50797135-50797906	GLI3
chr2:50899938-50900496	GLI3
chr2:51044942-51045185	GLI3
chr2:89726337-89726658	ALG2
chr2:97969305-97969576	PIEZO2
chr2:103139148-103139203	LAMA3
chr2:103182122-103182202	LAMA3
chr2:111989373-111989446	DNAJB6
chr2:119304643-119305891	PEX2
chr2:119311007-119311225	PEX2
chr2:119313864-119313932	PEX2
chr2:119345341-119345503	PEX2
chr2:119356782-119357231	PEX2
chr2:119397501-119398810	PEX2
chr2:119442481-119443170	PEX2
chr2:119744464-119744937	PEX2
chr2:119787886-119787971	PEX2
chr2:126515560-126515951	GDF6
chr2:126531165-126531373	GDF6
chr2:126551002-126551324	GDF6
chr2:126583735-126584082	GDF6
chr2:127802361-127802536	VPS13B
chr2:127857812-127858126	VPS13B
chr2:127879984-127880582	VPS13B
chr2:127892684-127893206	VPS13B
chr2:127976083-127976297	VPS13B
chr2:127978801-127978938	VPS13B
chr2:128064591-128066648	VPS13B
chr2:128093954-128094894	VPS13B
chr2:128096041-128096642	VPS13B
chr2:128138367-128139463	VPS13B
chr2:136376150-136376347	TNFRSF11B
chr20:628192-628313	SAMHD1
chr20:631863-631940	SAMHD1
chr20:5619646-5620179	SLC2A10
chr21:1591169-1591279	SKI
chr21:1677162-1678112	SKI
chr21:6017280-6018250	KDM1A
chr21:6020124-6020395	KDM1A
chr21:6326830-6326934	CDC42
chr21:6616959-6617552	ECE1
chr22:276108-276573	GFPT1
chr22:309834-309932	GFPT1
chr22:351624-351825	GFPT1
chr22:375365-375992	GFPT1
chr23:2453103-2453962	SELENON
chr23:2465143-2466057	SELENON
chr23:5266673-5266808	CDK5
chr23:5385474-5387029	PLEC
chr24:462838-462982	DCPS
chr24:468488-468757	DCPS
chr24:4244901-4245215	CBL
chr25:271838-272086	PIP5K1C
chr25:1839527-1840027	SF3B4
chr26:644650-645842	FGFR3
chr26:1327637-1328664	ALX3
chr27:5948964-5949289	MEOX1
chr27:5951098-5951575	MEOX1
chr27:5952998-5953110	MEOX1
chr28:390752-390857	FBN2
chr3:1915273-1916682	BCL11A
chr3:4175463-4175813	RIN2
chr3:4177232-4177497	RIN2
chr3:4179020-4179220	RIN2
chr3:4206800-4207019	ABHD12
chr3:4211497-4211633	ABHD12
chr3:4349151-4349296	KLC2
chr3:19369049-19369531	TGFB2
chr3:19433272-19434006	TGFB2
chr3:19438056-19438532	TGFB2
chr3:51264178-51264237	ARID1B
chr3:51275416-51275648	ARID1B
chr3:51276953-51277396	ARID1B
chr3:51294887-51295445	ARID1B
chr3:58149092-58149852	LAMA2
chr3:58348698-58348953	LAMA2
chr3:58460982-58461509	LAMA2
chr3:74938303-74938759	MAP3K7
chr3:74981246-74981722	MAP3K7
chr3:75009835-75010091	MAP3K7
chr3:76903138-76903392	SNX14
chr3:80825538-80825789	COL12A1
chr3:80839430-80839650	COL12A1
chr3:86957711-86957842	DST
chr3:86960037-86960245	DST
chr3:101364930-101365052	WDR35
chr3:101413236-101413599	MATN3
chr3:101417146-101417245	MATN3
chr3:105121146-105121280	ESCO2
chr3:107966781-107967080	TFAP2B
chr3:108203038-108203432	TFAP2B
chr3:108223719-108224005	TFAP2B
chr3:108229634-108229939	TFAP2B
chr3:108231855-108232170	TFAP2B
chr3:108233403-108234020	TFAP2B
chr33:5598786-5598881	STAC3
chr33:7154828-7155048	KMT2D
chr33:7165134-7165534	KMT2D
chr4:1493342-1493692	TBX22
chr4:2261498-2261611	TAF1
chr4:4192709-4192830	FHL1
chr4:4228116-4228321	FHL1
chr4:18151520-18151914	IDS
chr4:18153984-18155003	IDS
chr4:18162647-18162845	IDS
chr4:18304903-18305032	IDS
chr4:18379136-18379410	IDS
chr4:18380548-18381150	IDS
chr4:18384463-18385324	IDS
chr4:18497525-18498637	IDS
chr4:36754999-36755337	GRID2
chr4:42234650-42234882	AGA
chr4:45071124-45071475	ANTXR2
chr4:45183050-45183281	ANTXR2
chr4:45189013-45189222	ANTXR2
chr4:45258112-45258542	ANTXR2
chr4:52245677-52245903	FAT4
chr4:52273731-52274405	FAT4
chr4:52282687-52283158	FAT4
chr4:52299137-52299371	FAT4
chr4:52509585-52509891	FAT4
chr4:52519564-52519679	FAT4
chr4:52558704-52558936	FAT4
chr4:52628365-52628492	FAT4
chr4:68560698-68560918	UCHL1
chr4:68574400-68574555	UCHL1
chr4:76202735-76202959	TAPT1
chr4:76247462-76248059	TAPT1
chr4:76336811-76336942	TAPT1
chr4:76362364-76362416	TAPT1
chr4:76413165-76413490	TAPT1
chr4:79124534-79124666	EVC2
chr4:85064240-85064345	FGFRL1
chr4:91030548-91030897	PLEC
chr5:13868768-13868914	PTF1A
chr5:14267857-14268073	TNNT3
chr5:16148631-16148711	HRAS
chr5:16242805-16242973	HRAS
chr5:16252096-16252400	HRAS
chr5:19269545-19269840	SLC1A2
chr5:19272312-19272586	SLC1A2
chr5:19379747-19379903	SLC1A2
chr5:25858537-25858656	CAPN3
chr5:25867775-25868240	CAPN3
chr5:27929334-27929415	SMOC1
chr5:27936102-27936376	SMOC1
chr5:27959363-27959524	SMOC1
chr5:27975487-27975952	SMOC1
chr5:27979219-27979782	SMOC1
chr5:28007278-28007485	SMOC1
chr5:28061793-28061985	SMOC1
chr5:34514742-34514995	AP4S1
chr5:37777894-37778832	SEC23A
chr5:38139636-38140296	LTBP2
chr5:38167031-38167232	LTBP2
chr5:38620217-38620438	TGFB3
chr5:38641911-38643171	TGFB3
chr5:38644601-38644977	TGFB3
chr5:44689430-44689901	FBLN5
chr5:44734607-44735095	FBLN5
chr5:54596217-54597223	SIX6
chr5:54596217-54597223	SIX6
chr5:58614814-58615065	BMP4
chr5:58626835-58626978	BMP4
chr5:58652986-58653159	BMP4
chr5:58664410-58664951	BMP4
chr5:58683489-58684173	BMP4
chr5:58753730-58754116	BMP4
chr5:58761082-58762031	BMP4
chr5:58781967-58782366	BMP4
chr5:58787588-58787871	BMP4
chr5:58814996-58815319	BMP4
chr5:58844334-58844988	BMP4
chr5:58850387-58850608	BMP4
chr5:58858174-58858685	BMP4
chr6:5525360-5525577	RET
chr6:11557571-11558066	GCK
chr6:12484268-12484924	SLC29A3
chr6:15884877-15885227	KAT6B
chr6:15930664-15930987	KAT6B
chr6:15977753-15977883	KAT6B
chr6:16003363-16003622	KAT6B
chr6:24187860-24188142	SUFU
chr6:24488274-24488629	NT5C2
chr6:31691261-31691435	FGFR2
chr6:36297872-36297963	ALDH18A1
chr7:699177-699574	COL3A1
chr7:807256-808134	COL3A1
chr7:831333-831592	COL3A1
chr7:2639494-2639662	UNC80
chr7:10825089-10825555	SATB2
chr7:10826584-10827408	SATB2
chr7:10834547-10834929	SATB2
chr7:10842754-10843200	SATB2
chr7:10865239-10865817	SATB2
chr7:10905489-10905726	SATB2
chr7:10916805-10918650	SATB2
chr7:16371032-16371142	HOXD13
chr7:16809949-16810195	CHRNA1
chr8:1850726-1851010	KIF14
chr8:4583757-4583964	NOTCH2
chr8:4588469-4588619	NOTCH2
chr8:4600539-4600641	NOTCH2
chr8:5256476-5256972	GORAB
chr8:5263114-5263392	GORAB
chr8:5273388-5273551	GORAB
chr8:5286592-5286870	GORAB
chr8:5291550-5291798	GORAB
chr8:5314542-5315093	GORAB
chr8:5319660-5319935	GORAB
chr8:5329628-5330385	GORAB
chr8:5348658-5348955	GORAB
chr8:7879979-7881397	LAMC2
chr8:10924420-10924544	PRG4
chr8:10926842-10927309	PRG4
chr8:10930613-10930750	PRG4
chr8:10985542-10985676	PRG4
chr8:11008075-11009180	PRG4
chr8:11016667-11017833	PRG4
chr8:11021068-11021228	PRG4
chr8:11025380-11025633	PRG4
chr8:11061463-11062277	PRG4
chr8:11582515-11582580	COL11A1
chr8:21837642-21837971	PIK3R2
chr8:24730461-24730583	ORC1
chr8:27613697-27614155	OTX2
chr9:2947387-2947714	GPC6
chr9:8046784-8047453	PAX3
chr9:11676201-11676391	PLOD2
chr9:13100458-13100645	OPA1
chr9:13120266-13120563	OPA1
chr9:13140891-13141144	OPA1
chr9:13163952-13164236	OPA1
chr9:13166068-13166520	OPA1
chr9:13171795-13172512	OPA1
chr9:13187413-13187564	OPA1
chr9:13190566-13190900	OPA1
chr9:13209200-13209398	OPA1
chr9:14185317-14185645	TP63
chr9:14191393-14191918	TP63
chr9:14191393-14191918	P3H1
chr9:15111644-15112134	FGFR3
chr9:20158485-20158754	MECOM
chr9:20179397-20179605	MECOM
chr9:20184191-20186415	MECOM
chr9:20219852-20220904	MECOM
chr9:20254069-20254161	MECOM
chr9:20278559-20278902	MECOM
chr9:20288160-20288892	MECOM
chr9:20304124-20304386	MECOM
chr9:20317286-20318284	MECOM
chr9:20346658-20346911	MECOM
chr9:20357158-20358310	MECOM
chr9:20361209-20361979	MECOM
chr9:20364949-20365642	MECOM
chr9:20497173-20497293	MECOM
chr9:20557356-20557573	MECOM
chr9:20578703-20579161	MECOM
chr9:20612835-20613032	MECOM
chrUn_NW_020109979v1:2885-3155	HUWE1
chrZ:1219715-1219892	DYM
chrZ:9203094-9203411	TPM2
chrZ:44493103-44493336	ROR2
chrZ:56966312-56966489	FBN2
chrZ:56977948-56978405	FBN2
chrZ:56977948-56978405	FBN1
chrZ:56980253-56980585	FBN2
chrZ:56990100-56990215	FBN2
chrZ:57017876-57019159	FBN2
chrZ:57034838-57035058	FBN2
chrZ:57047406-57047643	FBN2
chrZ:57122529-57122637	FBN2
chrZ:57125308-57125441	FBN2
chrZ:57134761-57135015	FBN2
chrZ:66928570-66928641	MUSK
chrZ:81203285-81203474	LOX
chrZ:81205789-81205973	LOX

## Sheet: Supplementary_Table_9b_
#Supplementary_Table_9b_int_spec_GO-mouse_phenotype_abnormal_joint_morphology
CEs coordinates	Associated gene
chr1:8978908-8979246	SEMA3A
chr1:9186206-9188615	SEMA3A
chr1:9463993-9464344	SEMA3A
chr1:9487195-9487330	SEMA3A
chr1:71802795-71802984	LRP6
chr1:75869268-75869431	PHC1
chr1:80706755-80706878	FSTL1
chr1:86471493-86471688	RPL24
chr1:92638285-92638342	ARL6
chr1:133982656-133982946	AFF3
chr1:134272131-134272227	AFF3
chr1:134321695-134321812	AFF3
chr1:145718059-145719955	ZIC2
chr1:171956006-171956204	COG6
chr1:172100666-172100957	COG6
chr1:193635460-193636685	TENM4
chr10:17891322-17891424	LRRK1
chr11:1554039-1554149	HYDIN
chr12:8127347-8127652	WNT5A
chr12:8376107-8376466	WNT5A
chr12:8403721-8403818	WNT5A
chr12:8500735-8501019	WNT5A
chr12:8592584-8593093	WNT5A
chr12:8627842-8628632	WNT5A
chr12:9199776-9199927	FLNB
chr12:9203771-9203987	FLNB
chr12:11781825-11782149	SETD5
chr12:11816614-11816936	SETD5
chr12:14793894-14794229	LRIG1
chr12:14803246-14803382	LRIG1
chr12:14856437-14856534	LRIG1
chr12:14864394-14864662	LRIG1
chr12:14865782-14866006	LRIG1
chr12:19928508-19928728	PLXND1
chr12:19948062-19948216	PLXND1
chr12:19952154-19952283	PLXND1
chr12:19955990-19956736	PLXND1
chr13:3860792-3861276	FGF18
chr13:9583722-9583837	SH3PXD2B
chr13:9611332-9611469	SH3PXD2B
chr13:9631386-9631540	SH3PXD2B
chr13:9632713-9632923	SH3PXD2B
chr13:10518674-10519066	MSX1
chr13:17701103-17701177	KIF3A
chr13:17709714-17709994	KIF3A
chr14:5301603-5301750	RAI1
chr14:12890481-12890932	CREBBP
chr14:14104557-14105598	IFT140
chr15:4961742-4961908	RFLNA
chr15:7663330-7663421	MN1
chr15:7667472-7667700	MN1
chr15:7695999-7696079	MN1
chr15:7727989-7728302	MN1
chr15:7729308-7729545	MN1
chr15:7911767-7912013	TTC28
chr15:7919889-7920112	TTC28
chr17:2337425-2337604	EHMT1
chr17:2348839-2349423	EHMT1
chr17:2977533-2977683	MAP3K4
chr17:6513072-6513247	PRRC2B
chr17:10266954-10267232	LMX1B
chr17:10287069-10287442	LMX1B
chr17:10293313-10293577	LMX1B
chr17:10302821-10303061	LMX1B
chr17:10320912-10321168	LMX1B
chr17:10378885-10379283	LMX1B
chr17:10418366-10418675	LMX1B
chr18:5068561-5068915	MBTD1
chr18:5087779-5087884	MBTD1
chr18:8615199-8615441	SOX9
chr18:8650637-8650904	SOX9
chr18:8842983-8843250	SOX9
chr18:8850792-8851177	SOX9
chr19:2946130-2946509	GTF2IRD1
chr19:2956679-2957109	GTF2IRD1
chr2:3049287-3049440	WNT9A
chr2:5324525-5325539	CSRNP1
chr2:10605014-10605171	WDR37
chr2:14388413-14388561	ZEB1
chr2:28033601-28033908	MEOX2
chr2:28072551-28072620	MEOX2
chr2:28182400-28182591	MEOX2
chr2:28213482-28213614	MEOX2
chr2:28223620-28223713	MEOX2
chr2:32600508-32600804	HOXA2
chr2:32613556-32614670	HOXA4
chr2:32632512-32633066	HOXA6
chr2:37618851-37619326	RARB
chr2:37707998-37708210	RARB
chr2:37740300-37740598	RARB
chr2:37767146-37767388	RARB
chr2:37772062-37772565	RARB
chr2:37773760-37773873	RARB
chr2:43406398-43406783	CTNNB1
chr2:47527386-47527462	BMPER
chr2:47594776-47595119	BMPER
chr2:47602052-47603257	BMPER
chr2:47639100-47639574	BMPER
chr2:47663415-47663676	BMPER
chr2:47755041-47755358	BMPER
chr2:47819847-47820967	BMPER
chr2:47833129-47833288	BMPER
chr2:50668206-50668294	GLI3
chr2:50700417-50700649	GLI3
chr2:50706261-50706675	GLI3
chr2:50719261-50719906	GLI3
chr2:50731870-50732424	GLI3
chr2:50738126-50738258	GLI3
chr2:50797135-50797906	GLI3
chr2:50899938-50900496	GLI3
chr2:51044942-51045185	GLI3
chr2:58765796-58766158	SOX4
chr2:67006539-67006588	SP8
chr2:67075100-67076419	FOXC1
chr2:67301146-67301588	FOXC1
chr2:67310398-67310506	FOXC1
chr2:116336841-116337298	SULF1
chr2:126515560-126515951	GDF6
chr2:126531165-126531373	GDF6
chr2:126551002-126551324	GDF6
chr2:126583735-126584082	GDF6
chr2:136683833-136684025	DSCC1
chr21:5338095-5340664	DHRS3
chr21:5385513-5385586	DHRS3
chr21:5388380-5388523	DHRS3
chr21:6326830-6326934	CDC42
chr22:276108-276573	ANTXR1
chr22:309834-309932	ANTXR1
chr22:351624-351825	ANTXR1
chr22:375365-375992	ANTXR1
chr23:2453103-2453962	SELENON
chr23:2465143-2466057	SELENON
chr24:350024-350384	CDON
chr24:371819-371871	CDON
chr26:644650-645842	FGFR3
chr26:2553007-2553210	MAPKAPK2
chr26:4882504-4883148	MDFI
chr26:4914047-4914294	MDFI
chr26:4916033-4916242	MDFI
chr26:4917382-4917549	MDFI
chr26:4918677-4919887	MDFI
chr26:5137614-5137731	FMOD
chr27:5367821-5367887	IMPAD1
chr27:5948964-5949289	MEOX1
chr27:5951098-5951575	MEOX1
chr27:5952998-5953110	MEOX1
chr27:6182060-6182157	HOXB9
chr27:7214380-7214510	RARA
chr27:7900413-7900613	G6PC
chr28:390752-390857	FBN2
chr28:1924594-1924690	ZAP70
chr28:1926774-1926957	ZAP70
chr3:15079792-15079917	BMP2
chr3:15197631-15198506	BMP2
chr3:15202458-15203683	BMP2
chr3:17329681-17330844	TMEM63A
chr3:17334162-17335166	TMEM63A
chr3:17337291-17337484	TMEM63A
chr3:19110279-19111282	LYPLAL1
chr3:19138158-19138337	LYPLAL1
chr3:19146381-19146964	LYPLAL1
chr3:19194165-19194504	LYPLAL1
chr3:19216809-19217515	LYPLAL1
chr3:19369049-19369531	LYPLAL1
chr3:19433272-19434006	LYPLAL1
chr3:19438056-19438532	LYPLAL1
chr3:30779049-30779426	VEGFA
chr3:57273843-57273920	ENPP1
chr3:78266057-78266178	FAM46A
chr3:78267521-78267715	FAM46A
chr3:94507964-94508169	SOX11
chr3:94722576-94723031	SOX11
chr3:94748423-94748583	SOX11
chr3:94912988-94913254	SOX11
chr3:99482246-99482365	MYCN
chr3:100767377-100768039	OSR1
chr3:100778235-100778714	OSR1
chr3:100857246-100857789	OSR1
chr3:100934004-100934699	OSR1
chr3:101039814-101040346	OSR1
chr3:101055079-101055614	OSR1
chr3:101081511-101081833	OSR1
chr3:101136076-101137415	OSR1
chr3:101177435-101177668	OSR1
chr3:101234821-101234922	OSR1
chr3:101243905-101244163	OSR1
chr32:564875-565032	PPP5C
chr33:5530678-5530820	GDF11
chr4:3837218-3837326	GPC3
chr4:3855580-3856241	GPC3
chr4:3872356-3872473	GPC3
chr4:12788870-12789646	PPP5C
chr4:18151520-18151914	IDS
chr4:18153984-18155003	IDS
chr4:18162647-18162845	IDS
chr4:18304903-18305032	IDS
chr4:18379136-18379410	IDS
chr4:18380548-18381150	IDS
chr4:18384463-18385324	IDS
chr4:18497525-18498637	IDS
chr4:31767393-31767454	EDNRA
chr4:31794304-31794612	EDNRA
chr4:31866740-31866961	EDNRA
chr4:31906887-31907400	EDNRA
chr4:31917142-31917340	EDNRA
chr4:34250136-34250586	INTU
chr4:50482764-50482998	ADAMTS3
chr4:50625589-50625860	ADAMTS3
chr4:50694131-50694414	ADAMTS3
chr4:51843907-51844177	INTU
chr4:51847401-51847820	INTU
chr4:51994012-51994191	INTU
chr4:52007835-52008576	INTU
chr4:76202735-76202959	TAPT1
chr4:76247462-76248059	TAPT1
chr4:76336811-76336942	TAPT1
chr4:76362364-76362416	TAPT1
chr4:76413165-76413490	TAPT1
chr5:13554383-13554626	CDKN1C
chr5:19131068-19131253	CD44
chr5:19269545-19269840	CD44
chr5:19272312-19272586	CD44
chr5:21971730-21971854	ALX4
chr5:27929334-27929415	SMOC1
chr5:27936102-27936376	SMOC1
chr5:27959363-27959524	SMOC1
chr5:27975487-27975952	SMOC1
chr5:27979219-27979782	SMOC1
chr5:28007278-28007485	SMOC1
chr5:28061793-28061985	SMOC1
chr5:41226395-41226924	SEL1L
chr5:41405149-41405709	SEL1L
chr5:54178221-54179253	HIF1A
chr5:54596217-54597223	SIX1
chr5:54596217-54597223	SIX1
chr5:58249553-58249740	NID2
chr5:58614814-58615065	BMP4
chr5:58626835-58626978	BMP4
chr5:58652986-58653159	BMP4
chr5:58664410-58664951	BMP4
chr5:58683489-58684173	BMP4
chr5:58753730-58754116	BMP4
chr5:58761082-58762031	BMP4
chr5:58781967-58782366	BMP4
chr5:58787588-58787871	BMP4
chr5:58814996-58815319	BMP4
chr5:58844334-58844988	BMP4
chr5:58850387-58850608	BMP4
chr5:58858174-58858685	BMP4
chr6:8937141-8938372	ARID5B
chr6:9037109-9038257	ARID5B
chr6:9045114-9045272	ARID5B
chr6:9206358-9206642	ARID5B
chr6:15884877-15885227	KAT6B
chr6:15930664-15930987	KAT6B
chr6:15977753-15977883	KAT6B
chr6:16003363-16003622	KAT6B
chr6:24776692-24776859	SH3PXD2A
chr6:24787104-24787176	SH3PXD2A
chr6:27902396-27902738	TCF7L2
chr6:31691261-31691435	FGFR2
chr7:6006484-6008079	TWIST2
chr7:6013150-6013320	TWIST2
chr7:6040592-6040719	TWIST2
chr7:6159584-6159716	TWIST2
chr7:6213856-6214049	TWIST2
chr7:6230153-6230615	TWIST2
chr7:6236079-6236251	TWIST2
chr7:6288314-6288424	TWIST2
chr7:16371032-16371142	HOXD10
chr7:25784385-25784782	GLI2
chr7:25932818-25932947	GLI2
chr7:25941441-25941643	GLI2
chr7:25951893-25952144	GLI2
chr7:26045097-26045237	GLI2
chr7:27794579-27794763	NRARP
chr7:28606621-28606749	EN1
chr8:5256476-5256972	PRRX1
chr8:5263114-5263392	PRRX1
chr8:5273388-5273551	PRRX1
chr8:10924420-10924544	PRG4
chr8:10926842-10927309	PRG4
chr8:10930613-10930750	PRG4
chr8:10985542-10985676	PRG4
chr8:11008075-11009180	PRG4
chr8:11016667-11017833	PRG4
chr8:11021068-11021228	PRG4
chr8:11025380-11025633	PRG4
chr8:11061463-11062277	PRG4
chr8:11582515-11582580	COL11A1
chr8:14028181-14028459	ABCA4
chr8:16089088-16089180	LMO4
chr8:16139158-16139217	LMO4
chr8:25519306-25519410	SSBP3
chr8:25523213-25523528	SSBP3
chr8:26737791-26738144	JUN
chr8:26777522-26777818	JUN
chr8:27613697-27614155	LMO4
chr9:8046784-8047453	PAX3
chr9:14185317-14185645	TP63
chr9:14191393-14191918	TP63
chr9:15111644-15112134	FGFR3
chr9:22812020-22812105	SHOX2
chr9:22953376-22953549	TIPARP
chr9:22959481-22959960	TIPARP
chrZ:9947753-9948262	NPR3
chrZ:16047657-16047820	FST
chrZ:16055278-16056160	FST
chrZ:17313431-17314431	IL6ST
chrZ:26121204-26121260	DMRT2
chrZ:31763325-31763410	FREM1
chrZ:31767809-31769416	FREM1
chrZ:32138382-32138756	PSIP1
chrZ:32151381-32151668	PSIP1
chrZ:32184767-32184914	PSIP1
chrZ:32207388-32207502	PSIP1
chrZ:34450545-34450661	PCSK5
chrZ:37239432-37239802	PCSK5
chrZ:40889136-40889270	GAS1
chrZ:40925303-40925398	GAS1
chrZ:40945550-40945658	GAS1
chrZ:40967480-40968135	GAS1
chrZ:40993421-40993657	GAS1
chrZ:41015079-41015256	GAS1
chrZ:41016487-41016591	GAS1
chrZ:41061657-41062335	GAS1
chrZ:41089505-41090114	GAS1
chrZ:41104287-41104648	GAS1
chrZ:41113348-41114208	GAS1
chrZ:41128346-41129042	GAS1
chrZ:44493103-44493336	ROR2
chrZ:56387056-56387707	LMNB1
chrZ:56966312-56966489	FBN2
chrZ:56977948-56978405	FBN2
chrZ:56980253-56980585	FBN2
chrZ:56990100-56990215	FBN2
chrZ:57017876-57019159	FBN2
chrZ:57034838-57035058	FBN2
chrZ:57047406-57047643	FBN2
chrZ:57122529-57122637	FBN2
chrZ:57125308-57125441	FBN2
chrZ:57134761-57135015	FBN2

## Sheet: Supplementary_Table_9c_
#Supplementary_Table_9c_int_spec_GO-mouse_phenotype_fused_joints
CEs coordinates	Associated gene
chr1:8978908-8979246	SEMA3A
chr1:9186206-9188615	SEMA3A
chr1:9463993-9464344	SEMA3A
chr1:9487195-9487330	SEMA3A
chr1:71802795-71802984	LRP6
chr1:75869268-75869431	PHC1
chr1:86471493-86471688	RPL24
chr1:133982656-133982946	AFF3
chr1:134272131-134272227	AFF3
chr1:134321695-134321812	AFF3
chr1:145718059-145719955	ZIC2
chr1:171956006-171956204	COG6
chr1:172100666-172100957	COG6
chr1:193635460-193636685	TENM4
chr12:8127347-8127652	WNT5A
chr12:8376107-8376466	WNT5A
chr12:8403721-8403818	WNT5A
chr12:8500735-8501019	WNT5A
chr12:8592584-8593093	WNT5A
chr12:8627842-8628632	WNT5A
chr12:9199776-9199927	FLNB
chr12:9203771-9203987	FLNB
chr12:11781825-11782149	SETD5
chr12:11816614-11816936	SETD5
chr12:14793894-14794229	LRIG1
chr12:14803246-14803382	LRIG1
chr12:14856437-14856534	LRIG1
chr12:14864394-14864662	LRIG1
chr12:14865782-14866006	LRIG1
chr12:19928508-19928728	PLXND1
chr12:19948062-19948216	PLXND1
chr12:19952154-19952283	PLXND1
chr12:19955990-19956736	PLXND1
chr13:17701103-17701177	KIF3A
chr13:17709714-17709994	KIF3A
chr14:5301603-5301750	RAI1
chr14:14104557-14105598	IFT140
chr15:4961742-4961908	RFLNA
chr15:7911767-7912013	TTC28
chr15:7919889-7920112	TTC28
chr17:6513072-6513247	PRRC2B
chr18:5068561-5068915	MBTD1
chr18:5087779-5087884	MBTD1
chr18:8615199-8615441	SOX9
chr18:8650637-8650904	SOX9
chr18:8842983-8843250	SOX9
chr18:8850792-8851177	SOX9
chr2:3049287-3049440	WNT9A
chr2:10605014-10605171	WDR37
chr2:28033601-28033908	MEOX2
chr2:28072551-28072620	MEOX2
chr2:28182400-28182591	MEOX2
chr2:28213482-28213614	MEOX2
chr2:28223620-28223713	MEOX2
chr2:32613556-32614670	HOXA4
chr2:37618851-37619326	RARB
chr2:37707998-37708210	RARB
chr2:37740300-37740598	RARB
chr2:37767146-37767388	RARB
chr2:37772062-37772565	RARB
chr2:37773760-37773873	RARB
chr2:43406398-43406783	CTNNB1
chr2:50668206-50668294	GLI3
chr2:50700417-50700649	GLI3
chr2:50706261-50706675	GLI3
chr2:50719261-50719906	GLI3
chr2:50731870-50732424	GLI3
chr2:50738126-50738258	GLI3
chr2:50797135-50797906	GLI3
chr2:50899938-50900496	GLI3
chr2:51044942-51045185	GLI3
chr2:67006539-67006588	SP8
chr2:116336841-116337298	SULF1
chr2:126515560-126515951	GDF6
chr2:126531165-126531373	GDF6
chr2:126551002-126551324	GDF6
chr2:126583735-126584082	GDF6
chr2:136683833-136684025	DSCC1
chr21:5338095-5340664	DHRS3
chr21:5385513-5385586	DHRS3
chr21:5388380-5388523	DHRS3
chr23:2453103-2453962	SELENON
chr23:2465143-2466057	SELENON
chr24:350024-350384	CDON
chr24:371819-371871	CDON
chr27:5948964-5949289	MEOX1
chr27:5951098-5951575	MEOX1
chr27:5952998-5953110	MEOX1
chr27:7214380-7214510	RARA
chr28:1924594-1924690	ZAP70
chr28:1926774-1926957	ZAP70
chr3:15079792-15079917	BMP2
chr3:15197631-15198506	BMP2
chr3:15202458-15203683	BMP2
chr3:17329681-17330844	TMEM63A
chr3:17334162-17335166	TMEM63A
chr3:17337291-17337484	TMEM63A
chr3:19110279-19111282	LYPLAL1
chr3:19138158-19138337	LYPLAL1
chr3:19146381-19146964	LYPLAL1
chr3:19194165-19194504	LYPLAL1
chr3:19216809-19217515	LYPLAL1
chr3:19369049-19369531	LYPLAL1
chr3:19433272-19434006	LYPLAL1
chr3:19438056-19438532	LYPLAL1
chr3:57273843-57273920	ENPP1
chr3:99482246-99482365	MYCN
chr3:100767377-100768039	OSR1
chr3:100778235-100778714	OSR1
chr3:100857246-100857789	OSR1
chr3:100934004-100934699	OSR1
chr3:101039814-101040346	OSR1
chr3:101055079-101055614	OSR1
chr3:101081511-101081833	OSR1
chr3:101136076-101137415	OSR1
chr3:101177435-101177668	OSR1
chr3:101234821-101234922	OSR1
chr3:101243905-101244163	OSR1
chr32:564875-565032	PPP5C
chr4:12788870-12789646	PPP5C
chr4:50482764-50482998	ADAMTS3
chr4:50625589-50625860	ADAMTS3
chr4:50694131-50694414	ADAMTS3
chr5:41226395-41226924	SEL1L
chr5:41405149-41405709	SEL1L
chr5:54596217-54597223	SIX1
chr5:54596217-54597223	SIX1
chr5:58614814-58615065	BMP4
chr5:58626835-58626978	BMP4
chr5:58652986-58653159	BMP4
chr5:58664410-58664951	BMP4
chr5:58683489-58684173	BMP4
chr5:58753730-58754116	BMP4
chr5:58761082-58762031	BMP4
chr5:58781967-58782366	BMP4
chr5:58787588-58787871	BMP4
chr5:58814996-58815319	BMP4
chr5:58844334-58844988	BMP4
chr5:58850387-58850608	BMP4
chr5:58858174-58858685	BMP4
chr6:24776692-24776859	SH3PXD2A
chr6:24787104-24787176	SH3PXD2A
chr6:27902396-27902738	TCF7L2
chr6:31691261-31691435	FGFR2
chr7:6006484-6008079	TWIST2
chr7:6013150-6013320	TWIST2
chr7:6040592-6040719	TWIST2
chr7:6159584-6159716	TWIST2
chr7:6213856-6214049	TWIST2
chr7:6230153-6230615	TWIST2
chr7:6236079-6236251	TWIST2
chr7:6288314-6288424	TWIST2
chr7:16371032-16371142	HOXD10
chr7:25784385-25784782	GLI2
chr7:25932818-25932947	GLI2
chr7:25941441-25941643	GLI2
chr7:25951893-25952144	GLI2
chr7:26045097-26045237	GLI2
chr7:27794579-27794763	NRARP
chr8:14028181-14028459	ABCA4
chr8:16089088-16089180	LMO4
chr8:16139158-16139217	LMO4
chr8:26737791-26738144	JUN
chr8:26777522-26777818	JUN
chr8:27613697-27614155	LMO4
chr9:8046784-8047453	PAX3
chrZ:9947753-9948262	NPR3
chrZ:26121204-26121260	DMRT2
chrZ:40889136-40889270	GAS1
chrZ:40925303-40925398	GAS1
chrZ:40945550-40945658	GAS1
chrZ:40967480-40968135	GAS1
chrZ:40993421-40993657	GAS1
chrZ:41015079-41015256	GAS1
chrZ:41016487-41016591	GAS1
chrZ:41061657-41062335	GAS1
chrZ:41089505-41090114	GAS1
chrZ:41104287-41104648	GAS1
chrZ:41113348-41114208	GAS1
chrZ:41128346-41129042	GAS1
chrZ:44493103-44493336	ROR2

## Sheet: Supplementary_Table_9d_
#Supplementary_Table_9d_ph_spec_GO-human_phenotype_Abnormality of the distal phalanx of the thumb
CEs coordinates	Associated gene
chr10:17944203-17944388	CHSY1
chr10:17945488-17945589	CHSY1
chr10:17946825-17947152	CHSY1
chr10:17949213-17950413	CHSY1
chr10:17969178-17969344	CHSY1
chr12:9286892-9287040	FLNB
chr12:9304445-9305738	FLNB
chr14:12892221-12893259	CREBBP
chr4:58294182-58294321	BMPR1B
chr4:58298806-58299005	BMPR1B
chr4:58304452-58306091	BMPR1B
chr4:58500333-58500613	BMPR1B
chr4:58509844-58510395	BMPR1B
chr4:58572037-58572523	BMPR1B
chr4:58580039-58580434	BMPR1B
chr4:58630600-58630799	BMPR1B
chr4:58649254-58649523	BMPR1B
chr4:58720102-58720310	BMPR1B
chr4:58728872-58729089	BMPR1B
chr4:58773898-58774100	BMPR1B
chr4:58791082-58791423	BMPR1B
chr4:58794231-58794614	BMPR1B
chr4:58795632-58795696	BMPR1B
chr4:58806709-58806998	BMPR1B
chr4:58811750-58811897	BMPR1B
chr4:58819227-58819826	BMPR1B
chr4:58831872-58832175	BMPR1B
chr4:83425036-83425383	FGFR2
chr6:24159958-24160113	SUFU
chr6:24196572-24196916	SUFU
chr6:24211127-24211168	SUFU
chr6:31839355-31839570	FGFR2
chr6:32011735-32011986	FGFR2
chr6:32029448-32030906	FGFR2
chr7:16384767-16384896	HOXD13
chr7:22269734-22269841	IHH
chr7:22273258-22274629	IHH
chr7:22278261-22281875	IHH
chr7:22284073-22286803	IHH
chr7:22287930-22288216	IHH
chr7:22296041-22297804	IHH
chr7:22299117-22300608	IHH
chr7:22302728-22303045	IHH
chr7:22305892-22306432	IHH
chr7:22308320-22308726	IHH
chr8:21147221-21147458	PTCH2
chr8:21151099-21151636	PTCH2
chr8:21151099-21151636	PTCH1
chr8:21174416-21174595	PTCH2
chr8:21175768-21176011	PTCH2
chr8:21186906-21187023	PTCH2
chr8:21203824-21204759	PTCH2
chr8:21250921-21251124	PTCH2
chrZ:41784957-41785506	PTCH1
chrZ:41815235-41815387	PTCH1
chrZ:41969975-41970391	PTCH1

## Sheet: Supplementary_Table_9e_
#Supplementary_Table_9e_ph_spec_GO-human_phenotype_Abnormality of the phalanges of the toes
CEs coordinates	Associated gene
chr1:60517888-60518751	WNK1
chr12:6267906-6268613	WNT7A
chr14:12892221-12893259	CREBBP
chr15:7113707-7113761	TRPV4
chr15:7134896-7135150	TRPV4
chr18:6082501-6082762	NOG
chr18:6094150-6094833	NOG
chr18:6115556-6116412	NOG
chr18:6156676-6156834	NOG
chr18:6179645-6180054	NOG
chr18:6183475-6183698	NOG
chr18:6208149-6208500	NOG
chr18:8519907-8520475	SOX9
chr18:8528469-8528853	SOX9
chr18:8550113-8550385	SOX9
chr18:8553941-8554298	SOX9
chr18:8562660-8562782	SOX9
chr18:8597775-8597965	SOX9
chr18:8631678-8631843	SOX9
chr18:8661408-8663001	SOX9
chr18:8664987-8665170	SOX9
chr18:8693894-8694126	SOX9
chr18:8708975-8709234	SOX9
chr18:8711602-8711967	SOX9
chr18:8722881-8723252	SOX9
chr18:8754073-8754399	SOX9
chr18:8776822-8777191	SOX9
chr18:8860055-8860116	SOX9
chr18:8960961-8962080	SOX9
chr2:29274548-29274641	TWIST1
chr2:29296975-29297207	TWIST1
chr2:29303569-29303854	TWIST1
chr2:29330478-29330601	TWIST1
chr2:29365798-29366143	TWIST1
chr2:29414127-29414370	TWIST1
chr2:29498665-29499041	TWIST1
chr2:29505614-29505770	TWIST1
chr2:29551515-29551756	TWIST1
chr24:5701383-5702319	FGFR3
chr3:14922081-14922132	BMP2
chr3:15224647-15225075	BMP2
chr3:15302857-15303025	BMP2
chr3:51303156-51303980	ARID1B
chr3:51528477-51528786	ARID1B
chr4:58294182-58294321	BMPR1B
chr4:58298806-58299005	BMPR1B
chr4:58304452-58306091	BMPR1B
chr4:58500333-58500613	BMPR1B
chr4:58509844-58510395	BMPR1B
chr4:58572037-58572523	BMPR1B
chr4:58580039-58580434	BMPR1B
chr4:58630600-58630799	BMPR1B
chr4:58649254-58649523	BMPR1B
chr4:58720102-58720310	BMPR1B
chr4:58728872-58729089	BMPR1B
chr4:58773898-58774100	BMPR1B
chr4:58791082-58791423	BMPR1B
chr4:58794231-58794614	BMPR1B
chr4:58795632-58795696	BMPR1B
chr4:58806709-58806998	BMPR1B
chr4:58811750-58811897	BMPR1B
chr4:58819227-58819826	BMPR1B
chr4:58831872-58832175	BMPR1B
chr4:69373732-69373856	WDR19
chr4:83413234-83413488	FGFR3
chr4:83414696-83414831	FGFR3
chr4:83416281-83416452	FGFR3
chr4:83425036-83425383	FGFR3
chr4:83425036-83425383	FGFR2
chr4:83434626-83434950	FGFR3
chr4:83444546-83444834	FGFR3
chr6:31839355-31839570	FGFR2
chr6:32011735-32011986	FGFR2
chr6:32029448-32030906	FGFR2
chr7:572015-572087	COL3A1
chr7:631678-631842	COL3A1
chr7:16384767-16384896	HOXD13
chr7:21944142-21944249	RETREG1
chr7:22269734-22269841	IHH
chr7:22273258-22274629	IHH
chr7:22278261-22281875	IHH
chr7:22284073-22286803	IHH
chr7:22287930-22288216	IHH
chr7:22296041-22297804	IHH
chr7:22299117-22300608	IHH
chr7:22302728-22303045	IHH
chr7:22305892-22306432	IHH
chr7:22308320-22308726	IHH
chr9:5024673-5024725	KIF1A
chr9:5037495-5037588	KIF1A
chr9:14223670-14223740	TP63

## Sheet: Supplementary_Table_9f_
#Supplementary_Table_9f_ph_spec_GO-human_phenotype_AplasiaHypoplasia of the phalanges of the hand
CEs coordinates	Associated gene
chr1:64953836-64953973	PDE3A
chr1:65118464-65119225	PDE3A
chr1:83340583-83340686	ZBTB20
chr1:83556043-83556149	ZBTB20
chr1:83651949-83652357	ZBTB20
chr1:83683334-83683554	ZBTB20
chr1:83686658-83686987	ZBTB20
chr1:122357372-122357742	NHS
chr10:3278994-3280179	GPX4
chr12:6267906-6268613	WNT7A
chr12:8413494-8413712	WNT5A
chr12:8599531-8599698	WNT5A
chr14:2991355-2992095	EIF4A3
chr14:8304367-8304595	XYLT1
chr14:8448119-8448265	XYLT1
chr14:8458622-8458758	XYLT1
chr14:8482782-8483074	XYLT1
chr14:8525529-8525634	XYLT1
chr14:8527266-8527360	XYLT1
chr14:8558465-8558824	XYLT1
chr14:8560326-8560450	XYLT1
chr14:16143070-16143340	PHF6
chr15:7113707-7113761	TRPV4
chr15:7134896-7135150	TRPV4
chr17:5148518-5150247	COL2A1
chr18:6082501-6082762	NOG
chr18:6094150-6094833	NOG
chr18:6115556-6116412	NOG
chr18:6156676-6156834	NOG
chr18:6179645-6180054	NOG
chr18:6183475-6183698	NOG
chr18:6208149-6208500	NOG
chr18:7867069-7867377	PRKAR1A
chr18:8345057-8345293	KCNJ2
chr18:8385783-8386322	KCNJ2
chr18:8388406-8388791	KCNJ2
chr18:8397380-8398289	KCNJ2
chr18:8404383-8404627	KCNJ2
chr18:8435687-8436229	KCNJ2
chr18:8455494-8455603	KCNJ2
chr18:8481362-8481702	KCNJ2
chr18:8487164-8487956	KCNJ2
chr18:8497715-8497890	KCNJ2
chr18:8519907-8520475	SOX9
chr18:8528469-8528853	SOX9
chr18:8550113-8550385	SOX9
chr18:8553941-8554298	SOX9
chr18:8562660-8562782	SOX9
chr18:8597775-8597965	SOX9
chr18:8631678-8631843	SOX9
chr18:8661408-8663001	SOX9
chr18:8664987-8665170	SOX9
chr18:8693894-8694126	SOX9
chr18:8708975-8709234	SOX9
chr18:8711602-8711967	SOX9
chr18:8722881-8723252	SOX9
chr18:8754073-8754399	SOX9
chr18:8776822-8777191	SOX9
chr18:8860055-8860116	SOX9
chr18:8960961-8962080	SOX9
chr2:68258422-68258659	PIGN
chr2:97770033-97770429	PIEZO2
chr2:97985999-97986339	PIEZO2
chr2:98016238-98016406	PIEZO2
chr2:98017914-98018127	PIEZO2
chr2:98021846-98022098	PIEZO2
chr2:126765160-126765776	PTDSS1
chr2:134872099-134872455	TRPS1
chr2:134883416-134883908	TRPS1
chr2:134989850-134990353	TRPS1
chr2:135076522-135077250	TRPS1
chr20:13088882-13090740	SALL4
chr24:5701383-5702319	FGFR3
chr3:13319498-13319576	JAG1
chr3:13564902-13565632	JAG1
chr3:13642860-13644270	JAG1
chr3:14922081-14922132	BMP2
chr3:15224647-15225075	BMP2
chr3:15302857-15303025	BMP2
chr3:51303156-51303980	ARID1B
chr3:51528477-51528786	ARID1B
chr3:61753976-61754218	GJA1
chr3:94831223-94831609	SOX11
chr3:99109464-99109629	MYCN
chr3:108981464-108981528	RUNX2
chr3:108985533-108985685	RUNX2
chr3:109059314-109059711	RUNX2
chr3:109063577-109064182	RUNX2
chr3:109122802-109123410	RUNX2
chr3:109128652-109129234	RUNX2
chr3:109196074-109196257	RUNX2
chr3:109205281-109205387	RUNX2
chr3:109239811-109240475	RUNX2
chr3:109245592-109245964	RUNX2
chr3:109247309-109247957	RUNX2
chr3:109253536-109253989	RUNX2
chr3:109289762-109291276	RUNX2
chr3:109294002-109294864	RUNX2
chr3:109329702-109329763	RUNX2
chr4:34812909-34813478	FRAS1
chr4:58294182-58294321	BMPR1B
chr4:58298806-58299005	BMPR1B
chr4:58304452-58306091	BMPR1B
chr4:58500333-58500613	BMPR1B
chr4:58509844-58510395	BMPR1B
chr4:58572037-58572523	BMPR1B
chr4:58580039-58580434	BMPR1B
chr4:58630600-58630799	BMPR1B
chr4:58649254-58649523	BMPR1B
chr4:58720102-58720310	BMPR1B
chr4:58728872-58729089	BMPR1B
chr4:58773898-58774100	BMPR1B
chr4:58791082-58791423	BMPR1B
chr4:58794231-58794614	BMPR1B
chr4:58795632-58795696	BMPR1B
chr4:58806709-58806998	BMPR1B
chr4:58811750-58811897	BMPR1B
chr4:58819227-58819826	BMPR1B
chr4:58831872-58832175	BMPR1B
chr4:69373732-69373856	WDR19
chr4:73283638-73283818	RBPJ
chr4:83413234-83413488	FGFR3
chr4:83414696-83414831	FGFR3
chr4:83416281-83416452	FGFR3
chr4:83425036-83425383	FGFR3
chr4:83425036-83425383	FGFR2
chr4:83434626-83434950	FGFR3
chr4:83444546-83444834	FGFR3
chr6:11154769-11155500	HERC3
chr6:16086939-16088970	KAT6B
chr6:24159958-24160113	SUFU
chr6:24196572-24196916	SUFU
chr6:24211127-24211168	SUFU
chr6:31839355-31839570	FGFR2
chr6:32011735-32011986	FGFR2
chr6:32029448-32030906	FGFR2
chr7:16384767-16384896	HOXD13
chr7:22269734-22269841	IHH
chr7:22273258-22274629	IHH
chr7:22278261-22281875	IHH
chr7:22284073-22286803	IHH
chr7:22287930-22288216	IHH
chr7:22296041-22297804	IHH
chr7:22299117-22300608	IHH
chr7:22302728-22303045	IHH
chr7:22305892-22306432	IHH
chr7:22308320-22308726	IHH
chr7:22490332-22490476	INS-IGF2
chr8:21147221-21147458	PTCH2
chr8:21151099-21151636	PTCH2
chr8:21151099-21151636	PTCH1
chr8:21174416-21174595	PTCH2
chr8:21175768-21176011	PTCH2
chr8:21186906-21187023	PTCH2
chr8:21203824-21204759	PTCH2
chr8:21250921-21251124	PTCH2
chr9:14223670-14223740	TP63
chr9:17941819-17942491	TBL1XR1
chr9:18012026-18012310	TBL1XR1
chr9:18019084-18019197	TBL1XR1
chr9:18057556-18058381	TBL1XR1
chrZ:2450711-2450854	SETBP1
chrZ:2853272-2853788	SETBP1
chrZ:2867385-2867545	SETBP1
chrZ:7945038-7945096	IL11RA
chrZ:11942176-11942257	LIFR
chrZ:12011352-12012360	LIFR
chrZ:12013850-12013969	LIFR
chrZ:26116425-26116756	SMARCA2
chrZ:26219899-26220220	SMARCA2
chrZ:41784957-41785506	PTCH1
chrZ:41815235-41815387	PTCH1
chrZ:41969975-41970391	PTCH1

## Sheet: Supplementary_Table_9g_
#Supplementary_Table_9g_ph_spec_GO-human_phenotype_AplasiaHypoplasia of the phalanges of the thumb
CEs coordinates	Associated gene
chr18:6082501-6082762	NOG
chr18:6094150-6094833	NOG
chr18:6115556-6116412	NOG
chr18:6156676-6156834	NOG
chr18:6179645-6180054	NOG
chr18:6183475-6183698	NOG
chr18:6208149-6208500	NOG
chr20:13088882-13090740	SALL4
chr24:5701383-5702319	FGFR3
chr4:58294182-58294321	BMPR1B
chr4:58298806-58299005	BMPR1B
chr4:58304452-58306091	BMPR1B
chr4:58500333-58500613	BMPR1B
chr4:58509844-58510395	BMPR1B
chr4:58572037-58572523	BMPR1B
chr4:58580039-58580434	BMPR1B
chr4:58630600-58630799	BMPR1B
chr4:58649254-58649523	BMPR1B
chr4:58720102-58720310	BMPR1B
chr4:58728872-58729089	BMPR1B
chr4:58773898-58774100	BMPR1B
chr4:58791082-58791423	BMPR1B
chr4:58794231-58794614	BMPR1B
chr4:58795632-58795696	BMPR1B
chr4:58806709-58806998	BMPR1B
chr4:58811750-58811897	BMPR1B
chr4:58819227-58819826	BMPR1B
chr4:58831872-58832175	BMPR1B
chr4:83413234-83413488	FGFR3
chr4:83414696-83414831	FGFR3
chr4:83416281-83416452	FGFR3
chr4:83425036-83425383	FGFR3
chr4:83425036-83425383	FGFR2
chr4:83434626-83434950	FGFR3
chr4:83444546-83444834	FGFR3
chr6:24159958-24160113	SUFU
chr6:24196572-24196916	SUFU
chr6:24211127-24211168	SUFU
chr6:31839355-31839570	FGFR2
chr6:32011735-32011986	FGFR2
chr6:32029448-32030906	FGFR2
chr7:22269734-22269841	IHH
chr7:22273258-22274629	IHH
chr7:22278261-22281875	IHH
chr7:22284073-22286803	IHH
chr7:22287930-22288216	IHH
chr7:22296041-22297804	IHH
chr7:22299117-22300608	IHH
chr7:22302728-22303045	IHH
chr7:22305892-22306432	IHH
chr7:22308320-22308726	IHH
chr8:21147221-21147458	PTCH2
chr8:21151099-21151636	PTCH2
chr8:21151099-21151636	PTCH1
chr8:21174416-21174595	PTCH2
chr8:21175768-21176011	PTCH2
chr8:21186906-21187023	PTCH2
chr8:21203824-21204759	PTCH2
chr8:21250921-21251124	PTCH2
chrZ:2450711-2450854	SETBP1
chrZ:2853272-2853788	SETBP1
chrZ:2867385-2867545	SETBP1
chrZ:41784957-41785506	PTCH1
chrZ:41815235-41815387	PTCH1
chrZ:41969975-41970391	PTCH1

## Sheet: Supplementary_Table_9h_
#Supplementary_Table_9h_ph_spec_GO-human_phenotype_Short phalanx of the thumb
CEs coordinates	Associated gene
chr18:6082501-6082762	NOG
chr18:6094150-6094833	NOG
chr18:6115556-6116412	NOG
chr18:6156676-6156834	NOG
chr18:6179645-6180054	NOG
chr18:6183475-6183698	NOG
chr18:6208149-6208500	NOG
chr20:13088882-13090740	SALL4
chr4:58294182-58294321	BMPR1B
chr4:58298806-58299005	BMPR1B
chr4:58304452-58306091	BMPR1B
chr4:58500333-58500613	BMPR1B
chr4:58509844-58510395	BMPR1B
chr4:58572037-58572523	BMPR1B
chr4:58580039-58580434	BMPR1B
chr4:58630600-58630799	BMPR1B
chr4:58649254-58649523	BMPR1B
chr4:58720102-58720310	BMPR1B
chr4:58728872-58729089	BMPR1B
chr4:58773898-58774100	BMPR1B
chr4:58791082-58791423	BMPR1B
chr4:58794231-58794614	BMPR1B
chr4:58795632-58795696	BMPR1B
chr4:58806709-58806998	BMPR1B
chr4:58811750-58811897	BMPR1B
chr4:58819227-58819826	BMPR1B
chr4:58831872-58832175	BMPR1B
chr6:24159958-24160113	SUFU
chr6:24196572-24196916	SUFU
chr6:24211127-24211168	SUFU
chr7:22269734-22269841	IHH
chr7:22273258-22274629	IHH
chr7:22278261-22281875	IHH
chr7:22284073-22286803	IHH
chr7:22287930-22288216	IHH
chr7:22296041-22297804	IHH
chr7:22299117-22300608	IHH
chr7:22302728-22303045	IHH
chr7:22305892-22306432	IHH
chr7:22308320-22308726	IHH
chr8:21147221-21147458	PTCH2
chr8:21151099-21151636	PTCH2
chr8:21151099-21151636	PTCH1
chr8:21174416-21174595	PTCH2
chr8:21175768-21176011	PTCH2
chr8:21186906-21187023	PTCH2
chr8:21203824-21204759	PTCH2
chr8:21250921-21251124	PTCH2
chrZ:2450711-2450854	SETBP1
chrZ:2853272-2853788	SETBP1
chrZ:2867385-2867545	SETBP1
chrZ:41784957-41785506	PTCH1
chrZ:41815235-41815387	PTCH1
chrZ:41969975-41970391	PTCH1

## Sheet: Supplementary_Table_9i
#Supplementary_Table_9i_ph_spec_GO-human_phenotype_short_phalanx_of_finger
CEs coordinates	Associated gene
chr1:64953836-64953973	PDE3A
chr1:65118464-65119225	PDE3A
chr1:83340583-83340686	ZBTB20
chr1:83556043-83556149	ZBTB20
chr1:83651949-83652357	ZBTB20
chr1:83683334-83683554	ZBTB20
chr1:83686658-83686987	ZBTB20
chr1:122357372-122357742	NHS
chr10:3278994-3280179	GPX4
chr12:8413494-8413712	WNT5A
chr12:8599531-8599698	WNT5A
chr14:2991355-2992095	EIF4A3
chr14:8304367-8304595	XYLT1
chr14:8448119-8448265	XYLT1
chr14:8458622-8458758	XYLT1
chr14:8482782-8483074	XYLT1
chr14:8525529-8525634	XYLT1
chr14:8527266-8527360	XYLT1
chr14:8558465-8558824	XYLT1
chr14:8560326-8560450	XYLT1
chr14:16143070-16143340	PHF6
chr15:7113707-7113761	TRPV4
chr15:7134896-7135150	TRPV4
chr17:5148518-5150247	COL2A1
chr18:6082501-6082762	NOG
chr18:6094150-6094833	NOG
chr18:6115556-6116412	NOG
chr18:6156676-6156834	NOG
chr18:6179645-6180054	NOG
chr18:6183475-6183698	NOG
chr18:6208149-6208500	NOG
chr18:7867069-7867377	PRKAR1A
chr18:8345057-8345293	KCNJ2
chr18:8385783-8386322	KCNJ2
chr18:8388406-8388791	KCNJ2
chr18:8397380-8398289	KCNJ2
chr18:8404383-8404627	KCNJ2
chr18:8435687-8436229	KCNJ2
chr18:8455494-8455603	KCNJ2
chr18:8481362-8481702	KCNJ2
chr18:8487164-8487956	KCNJ2
chr18:8497715-8497890	KCNJ2
chr18:8519907-8520475	SOX9
chr18:8528469-8528853	SOX9
chr18:8550113-8550385	SOX9
chr18:8553941-8554298	SOX9
chr18:8562660-8562782	SOX9
chr18:8597775-8597965	SOX9
chr18:8631678-8631843	SOX9
chr18:8661408-8663001	SOX9
chr18:8664987-8665170	SOX9
chr18:8693894-8694126	SOX9
chr18:8708975-8709234	SOX9
chr18:8711602-8711967	SOX9
chr18:8722881-8723252	SOX9
chr18:8754073-8754399	SOX9
chr18:8776822-8777191	SOX9
chr18:8860055-8860116	SOX9
chr18:8960961-8962080	SOX9
chr2:68258422-68258659	PIGN
chr2:97770033-97770429	PIEZO2
chr2:97985999-97986339	PIEZO2
chr2:98016238-98016406	PIEZO2
chr2:98017914-98018127	PIEZO2
chr2:98021846-98022098	PIEZO2
chr2:134872099-134872455	TRPS1
chr2:134883416-134883908	TRPS1
chr2:134989850-134990353	TRPS1
chr2:135076522-135077250	TRPS1
chr24:5701383-5702319	FGFR3
chr3:13319498-13319576	JAG1
chr3:13564902-13565632	JAG1
chr3:13642860-13644270	JAG1
chr3:14922081-14922132	BMP2
chr3:15224647-15225075	BMP2
chr3:15302857-15303025	BMP2
chr3:51303156-51303980	ARID1B
chr3:51528477-51528786	ARID1B
chr3:61753976-61754218	GJA1
chr3:94831223-94831609	SOX11
chr3:108981464-108981528	RUNX2
chr3:108985533-108985685	RUNX2
chr3:109059314-109059711	RUNX2
chr3:109063577-109064182	RUNX2
chr3:109122802-109123410	RUNX2
chr3:109128652-109129234	RUNX2
chr3:109196074-109196257	RUNX2
chr3:109205281-109205387	RUNX2
chr3:109239811-109240475	RUNX2
chr3:109245592-109245964	RUNX2
chr3:109247309-109247957	RUNX2
chr3:109253536-109253989	RUNX2
chr3:109289762-109291276	RUNX2
chr3:109294002-109294864	RUNX2
chr3:109329702-109329763	RUNX2
chr4:58294182-58294321	BMPR1B
chr4:58298806-58299005	BMPR1B
chr4:58304452-58306091	BMPR1B
chr4:58500333-58500613	BMPR1B
chr4:58509844-58510395	BMPR1B
chr4:58572037-58572523	BMPR1B
chr4:58580039-58580434	BMPR1B
chr4:58630600-58630799	BMPR1B
chr4:58649254-58649523	BMPR1B
chr4:58720102-58720310	BMPR1B
chr4:58728872-58729089	BMPR1B
chr4:58773898-58774100	BMPR1B
chr4:58791082-58791423	BMPR1B
chr4:58794231-58794614	BMPR1B
chr4:58795632-58795696	BMPR1B
chr4:58806709-58806998	BMPR1B
chr4:58811750-58811897	BMPR1B
chr4:58819227-58819826	BMPR1B
chr4:58831872-58832175	BMPR1B
chr4:69373732-69373856	WDR19
chr4:73283638-73283818	RBPJ
chr4:83413234-83413488	FGFR3
chr4:83414696-83414831	FGFR3
chr4:83416281-83416452	FGFR3
chr4:83425036-83425383	FGFR3
chr4:83425036-83425383	FGFR2
chr4:83434626-83434950	FGFR3
chr4:83444546-83444834	FGFR3
chr6:11154769-11155500	HERC3
chr6:16086939-16088970	KAT6B
chr6:24159958-24160113	SUFU
chr6:24196572-24196916	SUFU
chr6:24211127-24211168	SUFU
chr6:31839355-31839570	FGFR2
chr6:32011735-32011986	FGFR2
chr6:32029448-32030906	FGFR2
chr7:16384767-16384896	HOXD13
chr7:22269734-22269841	IHH
chr7:22273258-22274629	IHH
chr7:22278261-22281875	IHH
chr7:22284073-22286803	IHH
chr7:22287930-22288216	IHH
chr7:22296041-22297804	IHH
chr7:22299117-22300608	IHH
chr7:22302728-22303045	IHH
chr7:22305892-22306432	IHH
chr7:22308320-22308726	IHH
chr7:22490332-22490476	INS-IGF2
chr8:21147221-21147458	PTCH2
chr8:21151099-21151636	PTCH2
chr8:21151099-21151636	PTCH1
chr8:21174416-21174595	PTCH2
chr8:21175768-21176011	PTCH2
chr8:21186906-21187023	PTCH2
chr8:21203824-21204759	PTCH2
chr8:21250921-21251124	PTCH2
chr9:17941819-17942491	TBL1XR1
chr9:18012026-18012310	TBL1XR1
chr9:18019084-18019197	TBL1XR1
chr9:18057556-18058381	TBL1XR1
chrZ:2450711-2450854	SETBP1
chrZ:2853272-2853788	SETBP1
chrZ:2867385-2867545	SETBP1
chrZ:7945038-7945096	IL11RA
chrZ:11942176-11942257	LIFR
chrZ:12011352-12012360	LIFR
chrZ:12013850-12013969	LIFR
chrZ:26116425-26116756	SMARCA2
chrZ:26219899-26220220	SMARCA2
chrZ:41784957-41785506	PTCH1
chrZ:41815235-41815387	PTCH1
chrZ:41969975-41970391	PTCH1

## Sheet: Supplementary_Table_9j
#Supplementary_Table_9j_ph_spec_GO-mouse_phenotype_abnormal bone ossification
CEs coordinates	Associated gene
chr1:29711412-29712044	PRICKLE1
chr1:29849426-29849669	PRICKLE1
chr1:29889742-29890220	PRICKLE1
chr1:29944598-29945643	PRICKLE1
chr1:43311242-43311643	DUSP6
chr1:43617509-43617986	ATP2B1
chr1:46768938-46769111	APAF1
chr1:55209510-55209699	IGF1
chr1:65464066-65464534	SOX5
chr1:65534396-65534880	SOX5
chr1:65563294-65563562	SOX5
chr1:65632882-65633196	SOX5
chr1:65731513-65731731	SOX5
chr1:65735853-65736150	SOX5
chr1:65792068-65792978	SOX5
chr1:65820630-65820975	SOX5
chr1:65915704-65915823	SOX5
chr1:65934385-65934997	SOX5
chr1:65965342-65966078	SOX5
chr1:65983311-65983798	SOX5
chr1:66054312-66054883	SOX5
chr1:66064831-66065247	SOX5
chr1:66102983-66103583	SOX5
chr1:66122718-66123114	SOX5
chr1:66155851-66156297	SOX5
chr1:79555956-79556201	TBX15
chr1:79737401-79737730	TBX15
chr1:79754096-79754702	TBX15
chr1:107353868-107354930	RUNX1
chr1:107356801-107357336	RUNX1
chr1:107366318-107366570	RUNX1
chr1:107370249-107370602	RUNX1
chr1:107376404-107376910	RUNX1
chr1:107385392-107385643	RUNX1
chr1:107461981-107462255	RUNX1
chr1:107809275-107809858	RUNX1
chr1:131440794-131441060	RGN
chr1:131442947-131443068	RGN
chr1:167032997-167033403	CNMD
chr1:167045903-167047842	CNMD
chr1:170052014-170052232	RB1
chr1:170054382-170054681	RB1
chr1:180162561-180162902	IFT88
chr1:180166712-180167786	IFT88
chr1:183683811-183684292	MMP13
chr1:196222814-196222933	TNNT3
chr1:196746183-196746760	FUZ
chr10:3217137-3217240	TBC1D2B
chr10:3278994-3280179	SBNO2
chr10:17242364-17243015	IGF1R
chr10:17468560-17468917	MEF2C
chr10:17482616-17482771	MEF2C
chr10:17944203-17944388	LRRK1
chr10:17945488-17945589	LRRK1
chr10:17946825-17947152	LRRK1
chr10:17949213-17950413	LRRK1
chr10:17969178-17969344	LRRK1
chr11:17685744-17685824	GSE1
chr12:969007-969372	RPL29
chr12:969007-969372	ID4
chr12:1779958-1780189	PRKCD
chr12:8413494-8413712	WNT5A
chr12:8599531-8599698	WNT5A
chr12:9286892-9287040	FLNB
chr12:9304445-9305738	FLNB
chr12:9499505-9500037	PKD1
chr12:14050505-14050984	PRICKLE1
chr13:3392444-3392717	CTNNA1
chr13:11367618-11367753	EBF1
chr13:11403830-11404077	EBF1
chr13:11414858-11415585	EBF1
chr13:11423942-11424906	EBF1
chr13:11430793-11431198	EBF1
chr13:11442960-11444912	EBF1
chr13:11447225-11447972	EBF1
chr13:11461653-11461963	EBF1
chr13:11501190-11501572	EBF1
chr13:11513646-11514081	EBF1
chr13:11526243-11527215	EBF1
chr13:11532438-11533206	EBF1
chr13:11549417-11551007	EBF1
chr13:11557823-11559820	EBF1
chr13:11563044-11563664	EBF1
chr13:11571145-11571209	EBF1
chr13:11576479-11576745	EBF1
chr13:11625897-11628044	EBF1
chr13:11760909-11761303	EBF1
chr13:11777026-11777382	EBF1
chr13:11786260-11786835	EBF1
chr13:11803057-11803923	EBF1
chr13:11805494-11805731	EBF1
chr13:11808950-11809540	EBF1
chr13:11864922-11865259	EBF1
chr13:11874067-11874502	EBF1
chr13:13825651-13825873	NDST1
chr13:14004088-14004192	CSF1R
chr13:18040613-18040806	NR3C1
chr13:18107351-18107549	NR3C1
chr13:18114631-18114831	NR3C1
chr14:2178753-2178942	FAM20C
chr14:6708008-6708099	PKD1
chr14:8304367-8304595	XYLT1
chr14:8448119-8448265	XYLT1
chr14:8458622-8458758	XYLT1
chr14:8482782-8483074	XYLT1
chr14:8525529-8525634	XYLT1
chr14:8527266-8527360	XYLT1
chr14:8558465-8558824	XYLT1
chr14:8560326-8560450	XYLT1
chr14:12892221-12893259	CREBBP
chr14:16143070-16143340	GPC3
chr15:5016982-5017120	RFLNA
chr15:6818507-6819041	TMEM119
chr15:11180099-11180155	LIF
chr17:5148518-5150247	COL2A1
chr17:5976071-5977267	PRRX2
chr17:7335711-7335875	DBH
chr18:6082501-6082762	NOG
chr18:6094150-6094833	NOG
chr18:6115556-6116412	NOG
chr18:6156676-6156834	NOG
chr18:6179645-6180054	NOG
chr18:6183475-6183698	NOG
chr18:6208149-6208500	NOG
chr18:7501837-7502028	AXIN2
chr18:7512750-7513434	AXIN2
chr18:7706764-7707081	AXIN2
chr18:7867069-7867377	PRKAR1A
chr18:8519907-8520475	SOX9
chr18:8528469-8528853	SOX9
chr18:8550113-8550385	SOX9
chr18:8553941-8554298	SOX9
chr18:8562660-8562782	SOX9
chr18:8597775-8597965	SOX9
chr18:8631678-8631843	SOX9
chr18:8661408-8663001	SOX9
chr18:8664987-8665170	SOX9
chr18:8693894-8694126	SOX9
chr18:8708975-8709234	SOX9
chr18:8711602-8711967	SOX9
chr18:8722881-8723252	SOX9
chr18:8754073-8754399	SOX9
chr18:8776822-8777191	SOX9
chr18:8860055-8860116	SOX9
chr18:8960961-8962080	SOX9
chr18:9221939-9222118	SLC38A10
chr18:9234998-9235880	SLC38A10
chr18:9988269-9988502	TOB1
chr19:9347232-9347430	NOS2
chr19:9397096-9397209	NOS2
chr2:14075421-14075672	EPC1
chr2:23587341-23587689	COL1A2
chr2:23593692-23593789	COL1A2
chr2:28402218-28402503	SOSTDC1
chr2:29274548-29274641	TWIST1
chr2:29296975-29297207	TWIST1
chr2:29303569-29303854	TWIST1
chr2:29330478-29330601	TWIST1
chr2:29365798-29366143	TWIST1
chr2:29414127-29414370	TWIST1
chr2:29498665-29499041	TWIST1
chr2:29505614-29505770	TWIST1
chr2:29551515-29551756	TWIST1
chr2:32258197-32259540	SNX10
chr2:32271225-32271379	SNX10
chr2:32344843-32345231	SNX10
chr2:32402824-32404477	SNX10
chr2:32411529-32412579	SNX10
chr2:32453292-32453444	SNX10
chr2:32469085-32469294	SNX10
chr2:37673048-37673379	THRB
chr2:43578662-43578760	CTNNB1
chr2:44423712-44423895	CRTAP
chr2:44425740-44425870	CRTAP
chr2:44458689-44459491	CRTAP
chr2:58585606-58585820	SOX4
chr2:59112472-59113274	SOX4
chr2:59691765-59692134	ID4
chr2:59755688-59756001	ID4
chr2:67143932-67144452	FOXC1
chr2:67279205-67279575	FOXC1
chr2:67323880-67324353	FOXC1
chr2:68258422-68258659	TNFRSF11A
chr2:103450948-103451010	ZNF521
chr2:103553830-103554721	ZNF521
chr2:103758240-103758286	ZNF521
chr2:104063908-104064089	ZNF521
chr2:119384644-119384968	PEX2
chr2:123654813-123654962	MMP16
chr2:126603081-126603614	GDF6
chr2:134872099-134872455	TRPS1
chr2:134883416-134883908	TRPS1
chr2:134989850-134990353	TRPS1
chr2:135076522-135077250	TRPS1
chr21:1117968-1119375	PRDM16
chr21:1160577-1160802	PRDM16
chr21:1162190-1162741	PRDM16
chr21:3670456-3670743	PGD
chr21:3723746-3723832	PGD
chr21:6351320-6351668	CDC42
chr21:6357724-6357859	CDC42
chr22:530192-530339	RASSF2
chr22:531483-531686	RASSF2
chr22:1633602-1633887	BMP1
chr23:872511-872699	HIVEP3
chr23:902048-902425	HIVEP3
chr23:973486-974176	HIVEP3
chr23:2663520-2663682	RUNX3
chr23:5604912-5606073	PPIB
chr24:5173738-5174008	SIK3
chr24:5178140-5178355	SIK3
chr24:5179937-5180175	SIK3
chr24:5701383-5702319	FGFR3
chr25:188185-188307	CTSK
chr26:1601077-1601647	CDKN1A
chr26:2240142-2240218	ELK4
chr26:4163313-4163540	SCUBE3
chr26:4173399-4173643	SCUBE3
chr27:5243871-5244020	PTH1R
chr28:1023398-1023499	ELAVL1
chr28:1038171-1038219	ELAVL1
chr28:4218720-4219442	IGF1R
chr3:14922081-14922132	BMP2
chr3:15224647-15225075	BMP2
chr3:15302857-15303025	BMP2
chr3:23447362-23447460	PKDCC
chr3:57123752-57124002	CTGF
chr3:57135770-57136127	CTGF
chr3:57229987-57230288	CTGF
chr3:57301795-57301894	ENPP1
chr3:61753976-61754218	GJA1
chr3:78705750-78706447	FAM46A
chr3:78712159-78712336	FAM46A
chr3:81143803-81143905	COL12A1
chr3:87359374-87359651	BMP5
chr3:87367540-87368283	BMP5
chr3:87456917-87457538	BMP5
chr3:94831223-94831609	SOX11
chr3:108981464-108981528	RUNX2
chr3:108985533-108985685	RUNX2
chr3:109059314-109059711	RUNX2
chr3:109063577-109064182	RUNX2
chr3:109122802-109123410	RUNX2
chr3:109128652-109129234	RUNX2
chr3:109196074-109196257	RUNX2
chr3:109205281-109205387	RUNX2
chr3:109239811-109240475	RUNX2
chr3:109245592-109245964	RUNX2
chr3:109247309-109247957	RUNX2
chr3:109253536-109253989	RUNX2
chr3:109289762-109291276	RUNX2
chr3:109294002-109294864	RUNX2
chr3:109329702-109329763	RUNX2
chr3:109648275-109648499	RUNX1
chr3:109649868-109650370	RUNX3
chr32:16993-17132	RYR1
chr33:7349809-7350017	VDR
chr33:7575970-7576085	HOXC10
chr4:483403-483705	AR
chr4:510441-510776	AR
chr4:517878-519105	AR
chr4:520494-521762	AR
chr4:594212-595005	EFNB1
chr4:700839-701101	EFNB1
chr4:1634519-1634629	CLCN7
chr4:34754064-34754451	FAM20C
chr4:38046558-38046647	DKK2
chr4:38055915-38056226	DKK2
chr4:38074601-38074831	DKK2
chr4:51862612-51863362	INTU
chr4:51881196-51881538	INTU
chr4:58294182-58294321	BMPR1B
chr4:58298806-58299005	BMPR1B
chr4:58304452-58306091	BMPR1B
chr4:58304452-58306091	BMPR1A
chr4:58500333-58500613	BMPR1B
chr4:58509844-58510395	BMPR1B
chr4:58572037-58572523	BMPR1B
chr4:58580039-58580434	BMPR1B
chr4:58630600-58630799	BMPR1B
chr4:58649254-58649523	BMPR1B
chr4:58720102-58720310	BMPR1B
chr4:58728872-58729089	BMPR1B
chr4:58773898-58774100	BMPR1B
chr4:58791082-58791423	BMPR1B
chr4:58794231-58794614	BMPR1B
chr4:58795632-58795696	BMPR1B
chr4:58806709-58806998	BMPR1B
chr4:58811750-58811897	BMPR1B
chr4:58819227-58819826	BMPR1B
chr4:58831872-58832175	BMPR1B
chr4:62819315-62819606	ASAH1
chr4:62841679-62841766	ASAH1
chr4:69373732-69373856	WDR19
chr4:77427814-77428059	NKX3-2
chr4:77431104-77432203	NKX3-2
chr4:83413234-83413488	FGFR3
chr4:83414696-83414831	FGFR3
chr4:83416281-83416452	FGFR3
chr4:83425036-83425383	FGFR3
chr4:83425036-83425383	FGFR2
chr4:83434626-83434950	FGFR3
chr4:83444546-83444834	FGFR3
chr4:84761096-84762076	WLS
chr5:2527474-2527711	NELL1
chr5:3006192-3006866	ANO6
chr5:9773065-9773246	SCUBE2
chr5:9774592-9774821	SCUBE2
chr5:11282216-11282426	SOX6
chr5:11399989-11400153	SOX6
chr5:11418396-11418610	SOX6
chr5:11461538-11462229	SOX6
chr5:11494701-11495138	SOX6
chr5:11500736-11500971	SOX6
chr5:11507529-11508623	SOX6
chr5:11509853-11510694	SOX6
chr5:11546405-11546901	SOX6
chr5:11564674-11565471	SOX6
chr5:11580674-11581228	SOX6
chr5:11634585-11634670	SOX6
chr5:11644480-11646320	SOX6
chr5:11719638-11720055	SOX6
chr5:13525788-13525955	CDKN1C
chr5:13527447-13527536	CDKN1C
chr5:13646663-13646713	CDKN1C
chr5:16365081-16365555	TCIRG1
chr5:46047224-46047396	DICER1
chr5:53347750-53348770	ESR2
chr6:9035568-9035955	ARID5B
chr6:9100932-9101026	ARID5B
chr6:9105033-9105470	ARID5B
chr6:9123233-9123569	ARID5B
chr6:10308561-10308738	PAPSS2
chr6:16086939-16088970	KAT6B
chr6:31839355-31839570	FGFR2
chr6:31964851-31964929	DHRS3
chr6:32011735-32011986	FGFR2
chr6:32029448-32030906	FGFR2
chr7:6299780-6299934	HDAC4
chr7:6399291-6399496	HDAC4
chr7:10199963-10200160	SF3B1
chr7:10599238-10599972	SATB2
chr7:10668439-10668838	SATB2
chr7:11780126-11780252	BMPR2
chr7:12198827-12198924	CREB1
chr7:15476059-15476371	PRKRA
chr7:16384767-16384896	HOXD13
chr7:22269734-22269841	IHH
chr7:22273258-22274629	IHH
chr7:22278261-22281875	IHH
chr7:22284073-22286803	IHH
chr7:22287930-22288216	IHH
chr7:22296041-22297804	IHH
chr7:22299117-22300608	IHH
chr7:22302728-22303045	IHH
chr7:22305892-22306432	IHH
chr7:22308320-22308726	IHH
chr8:4867540-4868702	SUCO
chr8:4876277-4876496	SUCO
chr8:4878518-4878704	SUCO
chr8:11609541-11609765	COL11A1
chr8:11619655-11619876	COL11A1
chr8:11668020-11668909	COL11A1
chr8:11678383-11678614	COL11A1
chr8:11690345-11690892	COL11A1
chr8:11718632-11719035	COL11A1
chr8:11731908-11732121	COL11A1
chr8:11742337-11742881	COL11A1
chr8:16172386-16172503	HS2ST1
chr8:16187535-16187825	HS2ST1
chr8:21151099-21151636	PTCH1
chr8:26713926-26714585	MYSM1
chr8:27861841-27862417	USP1
chr8:27868106-27868291	USP1
chr8:29108628-29109027	WLS
chr9:8041162-8041354	PAX3
chr9:8090941-8091519	PAX3
chr9:8108009-8108204	PAX3
chr9:9259865-9260417	IRS1
chr9:19528149-19528307	FNDC3B
chr9:19587119-19587228	FNDC3B
chr9:23052156-23053528	GLI2
chrZ:10069151-10070108	NPR3
chrZ:17314720-17314961	IL6ST
chrZ:34024922-34025328	MLLT3
chrZ:41784957-41785506	PTCH1
chrZ:41815235-41815387	PTCH1
chrZ:41969975-41970391	PTCH1
chrZ:46130795-46131299	APC
chrZ:60268934-60269667	MEF2C
chrZ:60279236-60279958	MEF2C
chrZ:60473633-60474599	MEF2C
chrZ:60554505-60555296	MEF2C
chrZ:60577588-60577746	MEF2C
chrZ:60588869-60590790	MEF2C

[truncated: 5 more sheets: Supplementary_Table_9k_, Supplementary_Table_9l_, Supplementary_Table_9m_, Supplementary_Table_9n_, Supplementary_Table_9o_]
