# Supplementary material for: Identification of candidate regulatory elements controlling transcriptome during the formation of interphalangeal joints.
Source: Research Square preprint supplement (doi:10.21203/rs.3.rs-1413327/v1), 2022-03-21
Supplement: Supplementary file 2 [file b1a32ab4831294358cd44cc0.xlsx]

## Sheet: Supplementary_Table_1_
#Supplementary_Table_1_Differentially_expressed_genes
	baseMean	log2FoldChange	lfcSE	stat	pvalue	padj	gene_ID	symbol
1	2261.70943294189	-2.52113148914932	0.233492249045717	-10.7974954177416	3.53720734706774e-27	4.52621052130788e-23	ENSGALG00000040276	RUNX2
2	3109.62315748585	-1.96049459861922	0.225296269779892	-8.70185112489685	3.26513751512581e-18	2.08903498217749e-14	ENSGALG00000043690	C1H2ORF40
3	5478.27807958444	-2.07729602806553	0.246455298400652	-8.42869291731986	3.49547535148387e-17	1.49093675325292e-13	ENSGALG00000008018	SNAI1
4	2512.76878371464	-4.86109527482625	0.583591238971005	-8.32962345938811	8.10998831305131e-17	2.59438526134512e-13	ENSGALG00000011269	EPYC
5	309.521675055082	9.29234725144916	1.18998418348904	7.80879895748188	5.77355083307272e-15	1.47756712919997e-11	ENSGALG00000028770	INHBB
6	7409.12948095528	-3.5724219470903	0.468708318007411	-7.62184456695266	2.50076057421121e-14	5.33328871793443e-11	ENSGALG00000043185	MATN1
7	387.540695309192	3.1325353198416	0.428860034308891	7.30433024585676	2.78651216127225e-13	5.09374423080567e-10	ENSGALG00000038364	CCN3
8	580.770845661305	2.7088084856356	0.382483996584059	7.08214856001246	1.41936373872255e-12	2.21230300145365e-09	ENSGALG00000010258	LTBP2
9	103.660119189821	-6.19627000014546	0.876491215732608	-7.06940342233363	1.5560118015851e-12	2.21230300145365e-09	ENSGALG00000043829	EXTL1
10	519.187743228977	-3.90247268576959	0.57628895899104	-6.77172905169309	1.27252292727427e-11	1.62832033774015e-08	ENSGALG00000045875	GPIHBP1
11	8699.78156782061	2.10802626206827	0.320497799621767	6.57735018635399	4.78905977355045e-11	5.57098262385014e-08	ENSGALG00000030376	DHRS3
12	81.4630264661421	9.78910368951577	1.51679910038117	6.45379054289772	1.0908655819116e-10	1.01044744429867e-07	ENSGALG00000003713	NA
13	884.329585289366	-3.58149833966936	0.554604642632332	-6.45775037632288	1.06270841273966e-10	1.01044744429867e-07	ENSGALG00000030781	CA2
14	58.754424491697	-9.38722671845002	1.45498501015707	-6.4517686800338	1.10552236794166e-10	1.01044744429867e-07	ENSGALG00000037841	GRM7
15	71.9796289211231	6.1579722754939	0.972404400266415	6.33272769416383	2.40864448111486e-10	2.05473431868972e-07	ENSGALG00000006491	ANKRD1
16	14193.0691042291	2.7687688934176	0.441452743842607	6.27194854270689	3.56557429877892e-10	2.85156804544844e-07	ENSGALG00000038355	GDF5
17	1936.4919000883	2.34373008150628	0.375258122448009	6.24564783892453	4.22047119082947e-10	3.17677349163846e-07	ENSGALG00000007253	IL1RAP
18	423.641421787075	4.08734164636604	0.658658032736396	6.20555955172242	5.45026271856616e-10	3.87453120815403e-07	ENSGALG00000003560	SLC6A2
19	1341.31586172856	-2.07343114636728	0.339588391220837	-6.10571856980503	1.02339197914888e-09	6.54766188259453e-07	ENSGALG00000015627	HAPLN1
20	1518.7533777866	-3.43846189213634	0.562947058454397	-6.10796670929736	1.00908393943499e-09	6.54766188259453e-07	ENSGALG00000024428	C18H17ORF67
21	911.182067385421	3.19317656261751	0.532584657362276	5.99562251461074	2.02707402013759e-09	1.23516376960384e-06	ENSGALG00000030115	WISP1
22	66.6721506697573	9.50004718838529	1.6156120942795	5.88015354800988	4.09886071523876e-09	2.38404644146342e-06	ENSGALG00000032304	NA
23	144.802328428852	-4.59948674799841	0.78706965673422	-5.84381154659552	5.10197439142647e-09	2.83847236142144e-06	ENSGALG00000004209	ELFN1
24	7811.61865356782	2.76437795231666	0.473628629258103	5.83659386605665	5.32787523748308e-09	2.84064548078473e-06	ENSGALG00000028627	TIMP3
25	825.720348584913	1.78462149362356	0.307855710881349	5.79694132850234	6.75353049089398e-09	3.45672704645917e-06	ENSGALG00000043035	SHISA2
26	64.184033792748	8.48031532351391	1.46792769021191	5.77706611848823	7.60144206097124e-09	3.74107894662261e-06	ENSGALG00000011109	MAPK10
27	1691.63994945622	-2.31181993106271	0.400623572399198	-5.77055393225618	7.90113719726207e-09	3.7445537620802e-06	ENSGALG00000030712	COL2A1
28	1909.41721190668	2.52122546037507	0.453524532898498	5.55918208936083	2.71041808370129e-08	1.23866106425149e-05	ENSGALG00000035419	CDON
29	1264.77340119186	1.758947363444	0.316839213947183	5.55154566106586	2.83154732056721e-08	1.24939584530959e-05	ENSGALG00000013617	PDGFRL
30	33.8203005321664	8.52148816168145	1.54717999525341	5.50775487520811	3.63438991545773e-08	1.50018236639346e-05	ENSGALG00000016744	GABRA5
31	3153.8372171956	1.44265918158799	0.261814882513946	5.51022603350724	3.58373197783588e-08	1.50018236639346e-05	ENSGALG00000042458	ACTN1
32	61.7812077408906	5.94165406622256	1.08689864442347	5.46661282237062	4.58716499959759e-08	1.83429260421409e-05	ENSGALG00000011296	FRMD1
33	47.1997287903299	6.55137056306074	1.21555604546054	5.3896079802545	7.06115429458626e-08	2.73801607131896e-05	ENSGALG00000011860	NA
34	41.6456825731468	8.82216651527011	1.6400525578204	5.37919743681543	7.48186212952007e-08	2.81582081792173e-05	ENSGALG00000041327	TRIM55
35	5567.20653870601	-1.9470548941227	0.363537748058111	-5.35585342794021	8.5153519115613e-08	3.11321265886681e-05	ENSGALG00000005180	NA
36	251.450853280745	11.4155725636119	2.14698017006015	5.31703679558999	1.05470746091786e-07	3.74889907497358e-05	ENSGALG00000005140	RRAD
37	510.40029365188	-2.63630687401085	0.496485109560276	-5.30994147306	1.09660444314959e-07	3.7924730958222e-05	ENSGALG00000010269	KCNAB1
38	915.767876058159	2.2680808847871	0.438094142884149	5.17715409262361	2.25296130327177e-07	7.58655074649094e-05	ENSGALG00000003261	PTRF
39	825.817858560414	3.80629878565117	0.742149911001696	5.12874653655045	2.91677737809141e-07	9.57002136668144e-05	ENSGALG00000016014	RCAN1
40	2481.92430976855	-1.23041476363442	0.240550910735233	-5.11498692677449	3.13762686403906e-07	0.00010037268338061	ENSGALG00000008855	UGP2
41	756.704606335276	-2.1132351576152	0.416370919020015	-5.07536684499721	3.86749113459535e-07	0.000117908609952119	ENSGALG00000006174	VSTM4
42	1453.55641931069	1.1454452118436	0.225692846505175	5.07523933337133	3.87008566582449e-07	0.000117908609952119	ENSGALG00000012370	GINM1
43	3246.36920582762	1.95174966088418	0.387084980313877	5.04217357982106	4.60273473983783e-07	0.000136968822630151	ENSGALG00000011457	CCNI
44	160417.610721253	3.17296905055372	0.630129477027836	5.03542393464883	4.76792436762214e-07	0.000138659909563847	ENSGALG00000046616	CHGB
45	411.765383427779	2.96781333767502	0.590545861789728	5.02554251871424	5.02011322729438e-07	0.000142749708569909	ENSGALG00000006751	THY1
46	71.13289924246	7.17363630093627	1.46342740995091	4.90194201103347	9.48938510844436e-07	0.000263969938799248	ENSGALG00000012076	TIFA
47	24.4107203787121	8.05102875407657	1.66176767264625	4.84485821129006	1.26702129321106e-06	0.000344953286551674	ENSGALG00000035429	XKR4
48	26.907737562232	8.19168941511518	1.6939078089035	4.83597122113619	1.32497091997484e-06	0.000353215164416625	ENSGALG00000007358	CILP
49	420.68329751118	2.35806756250743	0.490100318487498	4.81139773543645	1.49878417450115e-06	0.000391396781569728	ENSGALG00000002554	TSPAN2
50	3944.8669997889	2.14274331064459	0.446480658084794	4.79918507519681	1.59312526887969e-06	0.000407712618811689	ENSGALG00000010741	MAP1LC3C
51	58.179764572645	5.20759136462703	1.10760235036995	4.70167959005109	2.58030176232545e-06	0.000647402771582676	ENSGALG00000006025	XIRP1
52	3425.49911133992	-0.973402206911754	0.208393203416025	-4.67098826139979	2.99754070834369e-06	0.000737625594307036	ENSGALG00000014582	CADM1
53	60.3449102381316	5.89184155005982	1.26289572806452	4.66534284591293	3.08102894928043e-06	0.000743865027075329	ENSGALG00000006992	MMP9
54	75.0569990715007	-3.07267021042048	0.663134659702679	-4.63355393276854	3.59441060671747e-06	0.000851742187473273	ENSGALG00000000225	MGAT4C
55	2940.95008044189	1.31460556194596	0.286398630719451	4.5901251645079	4.42980294224834e-06	0.001030613789982	ENSGALG00000016971	NA
56	1404.29619982795	3.06906095271923	0.682763026434825	4.49506026819423	6.95502454528406e-06	0.00157719154150891	ENSGALG00000006346	CXCL14
57	356.341998531	1.66478747593253	0.370536519539557	4.49291065291285	7.02562659159174e-06	0.00157719154150891	ENSGALG00000009378	PDGFC
58	161.577848101784	3.45305606150997	0.769590456498689	4.48687484668133	7.22755016447563e-06	0.00158044541236008	ENSGALG00000027655	TRABD2B
59	1278.20892688998	3.01453943386256	0.672119479172024	4.48512433767898	7.28714280472373e-06	0.00158044541236008	ENSGALG00000029301	BMP2
60	1578.47123676322	-1.22118643965791	0.274409220047352	-4.45023836825593	8.57750317367395e-06	0.0018292955101722	ENSGALG00000003939	KLF2
61	27.1510106797241	8.20518237807357	1.84584561087008	4.44521596484219	8.78036174810855e-06	0.00184006152165714	ENSGALG00000008148	MYBPC3
62	4696.74970159095	0.917102132121781	0.206464817972143	4.44192933754709	8.91558411556288e-06	0.00184006152165714	ENSGALG00000010448	LTBP1
63	1867.46713978498	2.31008398421529	0.520586329472073	4.4374657063276	9.10242181169014e-06	0.0018488030079744	ENSGALG00000012747	NEDD9
64	31.3441078858323	5.19988967783584	1.17976685179467	4.40755702698861	1.04543080613474e-05	0.00209020821801565	ENSGALG00000016001	LZTS3
65	46.0737812232325	3.34796973038178	0.763657049095969	4.38412731781258	1.16451655523132e-05	0.0022577505819303	ENSGALG00000005146	PDP2
66	50.6299014760905	4.51032389276717	1.02839957792557	4.38576987931594	1.1557625969678e-05	0.0022577505819303	ENSGALG00000023444	APELA
67	20.5257182702975	-7.86976087720805	1.8069374891428	-4.35530333755011	1.3288277334324e-05	0.00253786263835836	ENSGALG00000011813	HEG1
68	1318.82031797752	-0.958189235692715	0.220596224531925	-4.34363388460461	1.40145001217689e-05	0.00263719916997286	ENSGALG00000003120	NCOR2
69	7459.46043748872	1.84502151230368	0.427343894685396	4.31741633669987	1.57866215966043e-05	0.0029276175355094	ENSGALG00000015152	BOC
70	1630.80409482031	5.35695406705316	1.24210551596398	4.31280112535023	1.61199108781234e-05	0.00294671970852096	ENSGALG00000017308	CHRDL2
71	31.9172793196781	8.43796073116828	1.96807550498191	4.28741717978236	1.80762618833164e-05	0.00323797821112378	ENSGALG00000005797	COL20A1
72	11678.7119385281	4.2542838378161	0.992677601356627	4.28566518676563	1.82193209753761e-05	0.00323797821112378	ENSGALG00000032746	ENPP2
73	19.6633453574178	7.73838561187168	1.81846055113615	4.25545971125789	2.0861992930256e-05	0.0036087353644585	ENSGALG00000004393	LOC428824
74	32.3549391810114	6.55703738267955	1.54088212312303	4.25537897044964	2.08695230517294e-05	0.0036087353644585	ENSGALG00000012787	BMP6
75	54.0200004220357	3.29633211485126	0.775463394630679	4.25079009231785	2.13017737594994e-05	0.00363436662702072	ENSGALG00000008459	BMPR2
76	874.511826231254	1.45833491967655	0.343442013446395	4.24623331619318	2.1739425503486e-05	0.00366023274661325	ENSGALG00000016058	ERG
77	20.2793658451487	7.78277726673495	1.83839102444177	4.23347218478625	2.30110654719145e-05	0.00382402069842361	ENSGALG00000000560	PI16
78	675.947601556356	-1.15258790008061	0.275428181328295	-4.1847130330748	2.85526569539958e-05	0.00468409997927347	ENSGALG00000004420	SDK1
79	189.163245347979	1.87317825736133	0.448432235437813	4.17717128549536	2.95156763200616e-05	0.00472103242739385	ENSGALG00000029768	LOC107051813
80	23.0367077357435	6.99577365509406	1.6746473491099	4.17746080021708	2.94781446365157e-05	0.00472103242739385	ENSGALG00000039536	C2H8ORF22
81	19.3892428650357	7.71809799841032	1.849355316808	4.17339919931224	3.00088462167365e-05	0.00474065674307852	ENSGALG00000042554	ABCD2
82	861.422223624962	-1.12793744876067	0.272230634458005	-4.14331565220913	3.4232026017921e-05	0.00534186591372337	ENSGALG00000031424	SDC2
83	211.036375657726	1.4506026478584	0.35235542899008	4.11687327201432	3.84047104590356e-05	0.00592080331366048	ENSGALG00000002804	RND2
84	2288.92096472711	2.73360989745222	0.664550634127077	4.1134712045576	3.89753678060727e-05	0.00593724769579174	ENSGALG00000040355	TCF24
85	135.288219584656	-2.0612465190352	0.502383568350893	-4.10293379180648	4.07944017177831e-05	0.00614123722800885	ENSGALG00000030096	PDPN
86	19.1214440378856	7.69933978288574	1.8795702833277	4.09632981069183	4.19751812771292e-05	0.00617372896117409	ENSGALG00000039403	GRM8
87	1990.2255399803	-2.1378751516008	0.521886359601748	-4.09643806983614	4.19555659535048e-05	0.00617372896117409	ENSGALG00000040264	C9H2ORF82
88	39.8206926230644	5.08162658190608	1.24194573729795	4.09166554487473	4.28286043783233e-05	0.0062276684275571	ENSGALG00000005400	CACNA2D3
89	548.545832411501	1.70873832936493	0.418575449213304	4.08227078911685	4.45977892424041e-05	0.00641205967579554	ENSGALG00000016443	HPCAL1
90	36.0959624852632	-8.68415168630689	2.13027200122486	-4.0765459440455	4.57096271988823e-05	0.00649889321818776	ENSGALG00000034426	NA
91	10684.1974760512	-0.876956921530574	0.215618003690657	-4.06717855893299	4.75857809014883e-05	0.0066912928836862	ENSGALG00000000529	LIMD2
92	17.9087024863651	7.60441722033746	1.8784823156596	4.04817077964735	5.16194773460328e-05	0.00710239604429931	ENSGALG00000005442	PALMD
93	1806.30370334588	1.46078241594424	0.36079401041132	4.04879896503516	5.14811414682459e-05	0.00710239604429931	ENSGALG00000008716	FLRT3
94	572.963959739945	2.50960049532024	0.623213566644367	4.02687077053367	5.65240779144687e-05	0.0076944904361015	ENSGALG00000011288	DACT2
95	90.6089987397778	-3.2259750129311	0.804807540946289	-4.00838069824496	6.11365100090591e-05	0.00823476612711495	ENSGALG00000028225	SLC17A9
96	19611.77365944	1.5062451588952	0.378361367970298	3.98096974586857	6.86346854936311e-05	0.00914843162058858	ENSGALG00000014970	FSTL1
97	22.363932490714	6.9516214049714	1.75171537357349	3.96846514556194	7.23370347515412e-05	0.009542522646193	ENSGALG00000008952	NOXA1
98	288.779897876537	3.59473699621646	0.909390247545396	3.95290911236324	7.72067686376697e-05	0.0100809980764043	ENSGALG00000001527	VWA1
99	16.5139512005892	7.48662919672142	1.90317093665407	3.93376603884227	8.3625184983727e-05	0.0108087663338563	ENSGALG00000033408	ZBTB7C
100	148.662809892573	2.17309032320401	0.553496736201771	3.92611226240697	8.63298755066537e-05	0.0110467708698314	ENSGALG00000010201	ABHD18
101	24.9391012773468	8.08107841753253	2.06375453690841	3.91571685150033	9.0135985289736e-05	0.011419604631361	ENSGALG00000011404	HOPX
102	5801.18651631727	2.42182037878311	0.620243792844806	3.90462654640235	9.43710013042737e-05	0.0118389346342107	ENSGALG00000015720	CHODL
103	844.881442390992	-1.45710527378461	0.373853926380783	-3.89752566701815	9.71805251980406e-05	0.0120730291304284	ENSGALG00000009601	NELL2
104	261.549282276289	-3.3202034607302	0.854715093236953	-3.88457333560826	0.000102509748248708	0.012612641717216	ENSGALG00000003283	COMP
105	22993.1723802411	-1.68247673903232	0.433835308773245	-3.87814616516543	0.00010525547491763	0.0128271338766285	ENSGALG00000015015	CYTL1
106	33.5558763918001	3.98930326153286	1.03028447236123	3.87204055632333	0.00010792798797878	0.0130287408884573	ENSGALG00000014998	CABLES1
107	436.455001096031	1.51886556185025	0.395594925685676	3.83944652277235	0.000123311984251242	0.0147467303783074	ENSGALG00000039990	TNC
108	10940.0905199165	1.32304001419237	0.344874807476423	3.83629069305916	0.000124906553031891	0.0147991134499637	ENSGALG00000023904	FIBIN
109	230.385432587863	-1.71007658654201	0.446380319904754	-3.8309856198564	0.000127630965512376	0.0148469621336033	ENSGALG00000038022	COL22A1
110	3180.56202106564	1.18350972326991	0.308823911866535	3.83231245312826	0.00012694436807819	0.0148469621336033	ENSGALG00000043701	ELK3
111	531.016106776467	-1.1040000105379	0.288784210026895	-3.82292373407494	0.000131878579143234	0.0152028675560074	ENSGALG00000004676	BTG1L
112	1511.38323226953	-0.728613793538712	0.19116442168885	-3.81145082909123	0.000138153539390391	0.0157840418753522	ENSGALG00000003392	SBNO1
113	79.6489028006904	-3.00019767183095	0.78868616366561	-3.80404501821967	0.000142352292466053	0.0161198224282798	ENSGALG00000009737	TAC1
114	14.4234666617624	7.29193537366809	1.9199125960464	3.79805590560949	0.000145835435211382	0.0163693879733758	ENSGALG00000010379	SNCA
115	26.8498309771666	-7.28722243052031	1.92708000721037	-3.78148411236401	0.0001558961730739	0.0173464993969881	ENSGALG00000005253	C1QTNF8
116	398.943320922007	1.4958610563135	0.396101358706813	3.77646030096229	0.000159072899726059	0.0175473864215056	ENSGALG00000015271	NA
117	181.224434004351	-2.40167770159013	0.638352307779896	-3.76230754133692	0.000168352850257144	0.0184123339477813	ENSGALG00000001437	NTM
118	965.639181130923	-0.831406096125874	0.221161684459522	-3.7592682392417	0.00017041105500741	0.0184794903379222	ENSGALG00000006794	RAD50
119	968.975458203463	-0.880390515455901	0.235204718982663	-3.74308185339085	0.000181776981894984	0.0195463719355312	ENSGALG00000002515	OLFM1
120	43.7028645992635	8.89128731538846	2.38308576049508	3.73099762617915	0.000190723020951776	0.0200040309516305	ENSGALG00000016684	RHAG
121	683.780320717304	-1.18940133065859	0.31874133624237	-3.73155658026787	0.000190300255717725	0.0200040309516305	ENSGALG00000016705	SUPT3H
122	28476.6040914036	1.32948722097547	0.356141855445126	3.73302716501491	0.00018919218114612	0.0200040309516305	ENSGALG00000017644	COTL1
123	52.7935289533857	-5.61064748050015	1.50618703354426	-3.72506691104461	0.000195263421947485	0.0203137459125204	ENSGALG00000016276	KHDRBS2
124	6693.6152718799	1.44501059680467	0.389418115963298	3.71069176694609	0.000206693651366865	0.0209908885943683	ENSGALG00000013948	RASL11B
125	83.3661658120851	2.00207712572503	0.539460589009923	3.71125744217842	0.000206232227091013	0.0209908885943683	ENSGALG00000015056	LAMA3
126	23.3070127225367	6.1079759271947	1.64576571789079	3.71132771863948	0.000206174969826386	0.0209908885943683	ENSGALG00000042266	NA
127	433.087917548819	-0.970299402245211	0.261645460643756	-3.70845112259113	0.000208530901437357	0.0210107198015152	ENSGALG00000011687	AHNAK2
128	443.199153423346	1.31786992766124	0.356143704636153	3.70038810318888	0.000215269986428541	0.0215202714557783	ENSGALG00000033055	NA
129	652.82173844298	0.954192610984616	0.258081486465944	3.69725323598727	0.000217944904518644	0.0216187829319424	ENSGALG00000006417	SEC24A
130	38.120458622818	3.3771622643107	0.918553888561776	3.67660766163484	0.000236356128602636	0.0232647155507641	ENSGALG00000011008	MLK4
131	46.3864145031904	3.61260951692021	0.983825268331621	3.67200318309216	0.000240656684215949	0.0235071979482999	ENSGALG00000001995	LIMS2
132	16.5288708802316	7.48820039593903	2.04382893271909	3.66380976218827	0.00024849137428736	0.0239682312923033	ENSGALG00000016164	ABCG1
133	326.929538760031	-1.76788848443792	0.482612949593802	-3.66316006631378	0.000249122754132255	0.0239682312923033	ENSGALG00000043596	SNED1
134	19.4425629229164	6.74992626546004	1.84586755567337	3.65677713155193	0.000255406258727101	0.0243893916915819	ENSGALG00000028673	MARCH3
135	221.832945602291	1.97900191242614	0.543754195037769	3.63951566808359	0.000273151318040322	0.0258906982640293	ENSGALG00000008193	RELN
136	226.776716383287	-3.16740623782874	0.872547156745926	-3.63006883162768	0.000283345650283374	0.0266594922134268	ENSGALG00000007732	RTN4R
137	220.734357133407	2.04134609049459	0.565639131278731	3.60891949939842	0.000307474995903609	0.0287186134860042	ENSGALG00000043935	AFF1
138	69.3692878672895	2.25266240785583	0.625297207589218	3.60254672580545	0.000315114734478317	0.0292188995824967	ENSGALG00000029270	GATA3
139	18.1823992047567	7.626256855332	2.12440235417769	3.58983637931617	0.000330885591612819	0.0304605182034362	ENSGALG00000008914	NRAP
140	20.5862146950558	7.80439362794091	2.17631485040179	3.58605907895178	0.000335712934052472	0.0306841621723959	ENSGALG00000025864	WTIP
141	405.193460771638	2.90393728681533	0.810748702753016	3.58179701916831	0.000341238884843515	0.0309680338330327	ENSGALG00000017295	PTHLH
142	1729.46491915899	0.746590711359264	0.208768823840355	3.57615997266997	0.000348678330089495	0.0314203374072195	ENSGALG00000002922	NOTCH2
143	837.890834298677	1.85495293120399	0.519699391593495	3.56928055181355	0.000357962924940842	0.032031423689112	ENSGALG00000009107	NRXN1
144	200.105365787892	-1.66531194862677	0.468497355669288	-3.55458131934968	0.000378581418653488	0.0336411655075697	ENSGALG00000010470	TCERG1L
145	354.812607740934	-2.38301710938714	0.671242264672463	-3.55015950991994	0.000384997801866952	0.0338590275378658	ENSGALG00000031786	BLVRA
146	17.2463767576258	7.54985035950566	2.12716583137041	3.54925330604889	0.000386325259497374	0.0338590275378658	ENSGALG00000043810	NA
147	20.5824092658891	-3.93967507437249	1.1108906005223	-3.54641138607187	0.000390516054775487	0.0339934927680757	ENSGALG00000039356	HEPACAM
148	22.4037696234629	5.45351616522516	1.53866670440979	3.54431284539757	0.000393637861678014	0.0340337167434586	ENSGALG00000008135	SATB2
149	156.568195752665	1.6670363115379	0.470692185800197	3.54166982548025	0.000397602821250401	0.0341458100719471	ENSGALG00000033696	RALY
150	61.0671035982786	2.81152262888714	0.796474167041059	3.52996085150142	0.000415621161298612	0.03522045284753	ENSGALG00000005867	MARCH8
151	453.581690447801	-1.7490167042737	0.495350326055476	-3.53086818010456	0.000414198114230658	0.03522045284753	ENSGALG00000006958	COL27A1
152	40.3875293357628	4.17380170771169	1.18444261041419	3.52385305207158	0.000425320056024165	0.0358052331374027	ENSGALG00000039595	BTBD11
153	178.994803436868	3.07420683251452	0.873827308975212	3.51809425150585	0.000434657953944776	0.0363521776384141	ENSGALG00000011708	MYLK
154	431.718354189293	-1.94668867512361	0.554024610251188	-3.5137223854388	0.00044187436148276	0.0367157423995675	ENSGALG00000002816	STK10
155	13.5868580132191	-7.27490517876698	2.07327054008659	-3.50890298111463	0.000449959008611635	0.0369081761166313	ENSGALG00000036255	WNT7B
156	56.5506739714091	-3.21024672244454	0.91477552806191	-3.50932728736844	0.000449241722364566	0.0369081761166313	ENSGALG00000040010	NA
157	1270.3869594147	0.989474570088577	0.282146205676139	3.50695685493054	0.00045326263370945	0.0369423481588925	ENSGALG00000004569	UNC5B
158	1160.41226351461	1.16211826944633	0.331704179981373	3.50347791671359	0.00045922473088495	0.0371913902304039	ENSGALG00000008257	MERTK
159	2085.18323168527	1.13152777345641	0.323617088888869	3.49650192250811	0.000471401097067538	0.0379374115602278	ENSGALG00000013297	BBOX1
160	354.268367790346	-1.63839547275084	0.469765940407205	-3.48768467831159	0.000487222311921645	0.0389656043959336	ENSGALG00000002769	DNAJC12
161	78.4991563831963	3.56047635709634	1.02183813027994	3.4843839269542	0.00049327136374349	0.0391571745541286	ENSGALG00000007141	NA
162	620.353624169307	-1.1195752314672	0.321435409502857	-3.48304884393035	0.000495737908547111	0.0391571745541286	ENSGALG00000014234	ATXN10
163	3584.04671067077	1.56576085768674	0.44993275655968	3.47998858687022	0.000501435143163419	0.0393641968829394	ENSGALG00000035584	COL3A1
164	31.772107745715	-8.50015900135638	2.44773540063286	-3.47266252682322	0.000515322889423446	0.0402077542259903	ENSGALG00000033171	TGM4
165	641.465885990658	2.12962423751956	0.616395930184417	3.45496154863061	0.000550371307797542	0.0426821288156203	ENSGALG00000004758	KCNB1
166	361.329249873179	1.15797754152088	0.335479487542674	3.45170892564209	0.000557048304938363	0.0429396994577789	ENSGALG00000026373	KCNJ8
167	327.182683910751	1.63399296550927	0.473612258998126	3.45006476176482	0.000560452086796668	0.0429433826505998	ENSGALG00000006488	RYK
168	445.301969206452	2.99122063478447	0.867736216393396	3.44715430596754	0.000566524910049427	0.043150313982098	ENSGALG00000011235	GALNT15
169	1078.41567882058	-0.784266598032757	0.229463291218154	-3.41783033734639	0.000631224420906278	0.0477324742068195	ENSGALG00000019768	ACSF2
170	332.79831802572	2.98730605674815	0.874357285418229	3.41657364394149	0.000634145093401009	0.0477324742068195	ENSGALG00000034722	TLR2A
171	1520.95343946896	-0.844637555458703	0.247360176184931	-3.414606055371	0.000638743212615268	0.0477974160738302	ENSGALG00000009854	NEK2
172	847.635224058443	-1.35006511287036	0.396014994102262	-3.40912625273409	0.000651713108856656	0.0484844240751731	ENSGALG00000036360	TRPV4
173	276.605686445073	-1.34965168153287	0.396520299924549	-3.40373918255807	0.000664701896403084	0.0490917065302392	ENSGALG00000015101	BNC2
174	721.279222097322	1.80370108677565	0.530099401689618	3.40257144419821	0.000667548994706284	0.0490917065302392	ENSGALG00000027788	CPE
175	90.2191169298569	-2.28125952219519	0.670806744988638	-3.40077010143037	0.000671963146521314	0.0491339452736385	ENSGALG00000015754	NA
176	3512.25998085316	1.49035998029648	0.438843286365286	3.39610978816691	0.000683509378099624	0.0495936332980906	ENSGALG00000009612	TGFB2
177	1818.67040257085	-0.683420049244146	0.201295194306903	-3.39511358727311	0.000686001335867618	0.0495936332980906	ENSGALG00000014166	TSPO

## Sheet: Supplementary_Table_2_
#Supplementary_Table_2_Genes_with_normalized_counts
Interzone 1	Interzone 2	Interzone 3	Phalange 1	Phalange 2	Phalange 3	symbol	Gene_ID
185.865922284501	219.898324520656	144.930214652499	171.71281955826	66.072493416578	101.475372164375	NA	ENSGALG00000000004
104.549581285032	129.048312512122	198.573216179722	102.828025665702	100.681894730024	164.658151059174	NA	ENSGALG00000000011
403.007360338029	535.80859355033	297.389271624608	12.9782945014964	137.388835517011	7.65851865391508	NA	ENSGALG00000000044
0.893586164829333	11.3562515010667	0	18.9682765791101	0	17.2316669713089	LOC776719	ENSGALG00000000048
2634.29201391687	3288.15100280886	2907.07424065954	2523.77911536791	3310.9660589863	2763.7679192316	LAMTOR3	ENSGALG00000000055
390.497154030418	395.404029537141	399.969748229299	323.459032191141	581.018434171178	856.796774406749	TUBB3	ENSGALG00000000059
202.844059416259	368.56198053462	365.148852501101	350.413951540402	181.437164461397	205.822688823968	SPR	ENSGALG00000000067
211.779921064552	184.797183517358	95.9927395750317	1.99666069253791	2.09753947354216	87.115649688284	DDIAS	ENSGALG00000000071
2357.28030281978	4073.79712938266	3068.00324524121	3423.27475735624	3511.28107870957	3338.15681827523	TIMM17B	ENSGALG00000000086
1561.98861612167	1424.69337013382	578.779753320044	1768.04304324232	714.212190741105	1260.78363340077	INTS4	ENSGALG00000000091
148.335303361669	281.841514526474	182.57442625055	184.691114059756	162.559309199517	168.487410386132	ADIPOR1	ENSGALG00000000094
883.75671701621	865.139887081265	894.991130743678	1053.23851531374	729.943736792671	1053.04631491332	UBE2T	ENSGALG00000000102
19.6588956262453	0	0	122.794632591081	4.19507894708432	51.6950009139268	LOC395100	ENSGALG00000000104
117.059787592643	160.019907515031	108.227108344398	132.777936053771	63.9749539430358	144.554539592647	LRIF1	ENSGALG00000000106
37.530618922832	148.663656013964	66.8184755865417	0	44.0483289443853	87.115649688284	TRIM7.1	ENSGALG00000000107
339.562742635146	274.614809025795	307.741429814072	336.437326692637	141.583914464096	352.291858080094	AFMID	ENSGALG00000000109
15.1909648020987	0	0	0	0	0	SLURP1	ENSGALG00000000115
10908.0063140717	11711.3924571001	13212.1771656262	10834.8792480569	12549.5786702027	8966.21071407108	RACK1	ENSGALG00000000122
505.769769293402	438.764262541214	474.317066135451	707.816215504687	694.285565742454	489.187879018826	TCF25	ENSGALG00000000129
0	0	0	0	24.1217039457348	0	BLEC2	ENSGALG00000000136
3598.47148576772	3694.91128384707	4687.64544924738	4773.01738551186	4131.10399314128	4400.77628150595	SNRPE	ENSGALG00000000137
3.57434465931733	9.29147850087277	4.70552644975646	28.9515800417996	6.29261842062647	2.87194449521815	BLB1	ENSGALG00000000141
936.478300741141	805.26147007564	766.059706020351	863.555749522644	551.652881541588	895.089367676325	CEPT1	ENSGALG00000000142
148.335303361669	133.17785851251	123.284792983619	172.711149904529	108.023282887421	136.896020938732	SUPT6H	ENSGALG00000000146
17947.6781205971	19406.8014288229	15571.5281275341	15556.9817859091	18661.8086961046	13359.3284769231	RPL9	ENSGALG00000000150
62.5510315380533	43.3602330040729	17.8810005090745	56.9048297373303	47.1946381546986	40.2072229330542	ADAMTS19	ENSGALG00000000151
8.042275483464	25.8096625024244	0	0	29.3655526295902	0	DENND2D	ENSGALG00000000154
906.096371136944	939.471715088247	1101.09318924301	953.40548068685	1083.37913808452	772.553069213684	BRD2	ENSGALG00000000156
246.629781492896	441.861422041505	393.38201119964	397.335477815043	431.044361812913	362.822321229227	DMA	ENSGALG00000000158
382.454878546954	445.990968041893	210.807584949089	303.492425265762	721.553578898502	401.114914498802	ISOC1	ENSGALG00000000161
15.1909648020987	14.4534110013576	22.586526958831	32.9449014268754	0	4.78657415869692	DMB1	ENSGALG00000000162
48.253652900784	0	79.0528443559085	57.9031600835993	0	0	MYBPHL	ENSGALG00000000164
0	0	0	0	0	24.890185625224	ADORA1	ENSGALG00000000168
127.782821570595	0	14.1165793492694	103.826356011971	0	0	MYOG	ENSGALG00000000172
23.2332402855627	20.6477300019395	19.7632110889771	0	46.1458684179275	4.78657415869692	SLC27A6	ENSGALG00000000184
5.361516988976	10.3238650009697	4.70552644975646	0	10.4876973677108	1.91462966347877	MTCH1	ENSGALG00000000186
63.4446177028826	19.6153435018425	93.1694237051778	202.661060292597	118.510980255132	30.6340746156603	YTHDC2	ENSGALG00000000189
731.847068995224	235.38412202211	449.848328596717	315.472389420989	482.434078914696	429.834359450984	SLC23A2	ENSGALG00000000195
86.6778579884453	24.7772760023274	77.1706337760059	108.818007743316	10.4876973677108	44.0364822600117	PLEKHM1	ENSGALG00000000201
172.462129812061	111.497742010473	107.286003054447	178.701131982143	278.972749981107	188.591021852659	MCC	ENSGALG00000000208
341.349914964805	80.526147007564	463.964907945987	564.056645641958	237.021960510264	416.431951806632	PRNP	ENSGALG00000000209
356.540879766904	164.149453515419	320.91690387339	308.484076997106	288.411677612047	171.35935488135	DCP2	ENSGALG00000000215
27.7011711097093	15.4857975014546	0	0	0	38.2925932695754	PPFIA4	ENSGALG00000000217
1783.59798499935	894.04670908398	1319.42961651171	1698.15991900349	1653.90987488799	1624.56326946174	SRP19	ENSGALG00000000218
469.1327365354	74.3318280069821	541.135541721992	439.265352358339	404.825118393637	289.109079185294	APC	ENSGALG00000000220
582.618179468725	1070.58480060056	555.252121071262	744.754438316639	953.331690724911	741.918994598023	TMEM183A	ENSGALG00000000223
15.1909648020987	18.5829570017455	14.1165793492694	210.647703062749	80.7552697313731	111.048520481769	MGAT4C	ENSGALG00000000225
226.970885866651	65.0403495061094	457.377170916328	333.44233565383	149.974072358264	553.327972745364	TMEM9	ENSGALG00000000226
8935.86164829333	9119.06995535658	7465.78826518359	8213.26375875467	5748.30692724228	10165.7261982405	DPYSL2	ENSGALG00000000227
561.172111512821	698.925660565652	915.695447122606	619.96314503302	750.919131528093	763.937235728029	SP2	ENSGALG00000000233
24.126826450392	0	0	21.963267617917	1.04876973677108	12.445092812612	EPB41L4A	ENSGALG00000000234
345.817845788952	481.09210904519	591.955227379362	329.449014268754	339.80139471383	331.230931781827	PPP2R2A	ENSGALG00000000235
8.042275483464	8.25909200077579	0	0	0	6.70120382217569	NA	ENSGALG00000000239
182.291577625184	57.8136440054306	152.459056972109	239.599283104549	138.437605253782	44.0364822600117	STARD4	ENSGALG00000000241
442.32515159052	59.8784170056245	725.592178552445	400.33046885385	91.2429670990839	57.4388899043631	EBF2	ENSGALG00000000242
1139.3223601574	1253.31721111773	1458.7131994245	889.512338525637	1693.76312488529	1505.85623032605	RDM1	ENSGALG00000000243
252.884884646701	155.890361514643	171.281162771135	282.527487994114	132.144986833156	99.560742500896	CAMK4	ENSGALG00000000244
1797.00177747179	986.961494092708	802.762812328451	1498.4938497497	620.871684168479	659.589919068436	WDR36	ENSGALG00000000247
10.723033977952	30.9715950029092	0	0	7.34138815739755	28.7194449521815	GH	ENSGALG00000000249
0	0	0	0	6.29261842062647	12.445092812612	CD79B	ENSGALG00000000251
81.3163409994693	165.181840015516	128.931424723327	269.549193492617	79.706499994602	65.0974085582782	SLC25A46	ENSGALG00000000253
11.6166201427813	16.5181840015516	0	0	19.9266249986505	0	MAN2A1	ENSGALG00000000255
2748.67104301503	1938.82184718212	3162.11377423634	4054.21953619822	2848.45860507025	3193.60227868259	PSMF1	ENSGALG00000000259
149.228889526499	29.9392085028123	32.9386851482952	253.575907952314	89.1454276255417	76.5851865391508	PJA2	ENSGALG00000000264
125.102063076107	109.432969010279	57.4074226870288	109.816338089585	18.8778552618794	69.8839827169751	FER	ENSGALG00000000273
610.319350578434	910.564893085531	423.497380478081	641.926412650937	364.971868396335	313.041949978779	KCTD9	ENSGALG00000000275
19.6588956262453	0	40.4675274679055	0	0	21.0609262982665	FBXL17	ENSGALG00000000276
0.893586164829333	3.09715950029092	0.941105289951291	2.99499103880686	4.19507894708432	9.57314831739385	GNRH1	ENSGALG00000000277
75.061237845664	37.1659140034911	82.8172655157136	40.9315441970271	41.9507894708432	13.4024076443514	EFNA5	ENSGALG00000000280
5.361516988976	2.06477300019395	31.9975798583439	7.98664277015162	9.43892763093971	45.9511119234905	A2ML4	ENSGALG00000000293
187.65309461416	238.481281522401	120.461477113765	147.752891247805	353.435401291854	104.347316659593	PCNX1	ENSGALG00000000296
0	32.0039815030062	0	0	0	0	PKP1	ENSGALG00000000299
329.733294822024	65.0403495061094	130.813635303229	231.612640334397	11.5364671044819	5.74388899043631	TNNT2	ENSGALG00000000302
0	0	0	13.9766248477653	0	0	LAD1	ENSGALG00000000309
25.0204126152213	41.295460003879	53.6430015272236	91.8463918567437	19.9266249986505	45.9511119234905	DOCK5	ENSGALG00000000311
535.25811273277	153.825588514449	370.795484240809	407.318781277733	59.7798749959515	42.1218525965329	TNNI1	ENSGALG00000000313
260.033573965336	260.161398024438	671.949177025222	383.358852967278	7.34138815739755	473.870841710995	NA	ENSGALG00000000314
3.57434465931733	0	52.7018962372723	0	0	40.2072229330542	NEFM	ENSGALG00000000317
74.1676516808346	15.4857975014546	66.8184755865417	56.9048297373303	79.706499994602	43.0791674282723	CSRP1	ENSGALG00000000318
347.60501811861	360.302888533844	459.25938149623	722.791170698722	442.580828917395	356.121117407051	AHCYL1	ENSGALG00000000329
319.010260844072	197.185821518522	92.2283184152265	273.542514877693	393.288651289155	206.780003655707	PPP1R12B	ENSGALG00000000336
8.042275483464	1.03238650009697	8.46994760956162	20.964937271648	3.14630921031324	4.78657415869692	NA	ENSGALG00000000337
9520.26700009171	10473.5610434838	12272.0129809648	10342.7023873463	9860.53306512168	10922.0049153146	PSMC5	ENSGALG00000000349
2052.56742061298	1718.92352266146	2013.96532049576	1325.78269984517	1217.62166439122	1286.63113385773	TIMM44	ENSGALG00000000352
27.7011711097093	0	0	0	0	0	ADAMDEC1	ENSGALG00000000357
58.976686878736	84.6556930079519	116.69705595396	150.747882286612	92.2917368358549	66.0547233900176	NA	ENSGALG00000000362
0	0	0	0	0	1.91462966347877	STC1	ENSGALG00000000364
1.78717232965867	45.4250060042669	0	0	0	6.70120382217569	ASIC2	ENSGALG00000000367
396.752257184224	492.448360546257	558.075436941116	488.183539325518	460.409914442504	359.950376734009	RNPEP	ENSGALG00000000374
5878.00979224735	6771.42305413605	8948.02909685688	7853.86483409785	5541.69928909838	8167.81014440043	HNRNPM	ENSGALG00000000377
0.893586164829333	13.4210245012607	6.58773702965904	28.9515800417996	3.14630921031324	1.91462966347877	SLC25A37	ENSGALG00000000378
2122.26714146967	2817.38275876464	806.527233488257	1142.08991613168	1458.83870384857	1186.1130765251	ITGB3	ENSGALG00000000379
954.350024037727	848.621703079713	548.664384041603	434.273700626994	638.700769693587	359.950376734009	ENTPD4	ENSGALG00000000390
1518.20289404504	1011.73877009503	1052.15571416554	1477.52891247805	1527.00873673869	1534.57567527823	METTL2B	ENSGALG00000000396
592.447627281848	334.49322603142	981.572817419197	393.342156429967	568.433197329925	562.901121062758	IPO9	ENSGALG00000000397
39.3177912524906	51.6193250048487	18.8221057990258	84.858079432861	80.7552697313731	114.877779808726	DUSP28	ENSGALG00000000399
0.893586164829333	0	6.58773702965904	5.98998207761372	0	1.91462966347877	KCNC4	ENSGALG00000000400
166.207026658256	0	0	180.69779267468	17.8290855251083	3.82925932695754	RBM15	ENSGALG00000000401
3012.27896163968	2817.38275876464	2846.84350210266	2032.60058500359	942.8439933572	1628.39252878869	LOXL2	ENSGALG00000000402
861.417062895477	1045.80752459823	929.812026471876	868.547401253989	890.405506518646	835.735848108483	COPS2	ENSGALG00000000404
0	6.19431900058185	0	0	0	0	NA	ENSGALG00000000406
16.084550966928	0	81.8761602257623	52.9115083522545	55.5847960488672	78.4998162026296	LSM7	ENSGALG00000000407
1869.38225682296	1938.82184718212	2841.19687036295	2635.59211415003	2344.00036168336	2366.48226405976	NA	ENSGALG00000000408
695.210036237221	1060.26093559959	856.405813855675	694.837921003191	402.727578920094	852.010200248053	CHMP7	ENSGALG00000000409
97.4008919663973	192.023889018037	202.337637339528	211.646033409018	171.998236830457	229.755559617452	TLK2	ENSGALG00000000410
251.097712317043	316.942655529771	149.635741102255	347.418960501596	0	80.4144458661083	SLC16A4	ENSGALG00000000417
1291.23200817839	1439.14678113518	1652.58088915447	1274.86785218545	1578.39845384047	1797.83725400656	LAMTOR5	ENSGALG00000000419
3043.55447740871	1704.4701116601	2379.11417299686	3252.56026814425	1981.12603276057	2142.47059343274	CMTM3	ENSGALG00000000424
6708.1513393738	4604.44379043251	3864.17832054	7506.44587359626	3301.52713135536	2889.17616218946	NA	ENSGALG00000000428
319.010260844072	192.023889018037	58.3485279769801	102.828025665702	146.827763147951	114.877779808726	SPPL2C	ENSGALG00000000430
95.6137196367386	89.8176255084368	106.344897764496	118.801311206005	123.754828938987	113.920464976987	TUB4A	ENSGALG00000000433
0	0	4.70552644975646	0	0	0	PGA3	ENSGALG00000000437
18.765309461416	9.29147850087277	0	9.98330346268953	18.8778552618794	17.2316669713089	ERMP1	ENSGALG00000000438
100.975236625715	99.1091040093095	161.870109871622	14.9749551940343	141.583914464096	192.420281179616	KCNA2	ENSGALG00000000442
197.482542427283	502.772225547227	174.104478640989	132.777936053771	6.29261842062647	106.261946323072	TNFRSF10B	ENSGALG00000000452
803.33396218157	836.233065078549	1168.8527701195	1247.91293283619	1068.69636176973	765.851865391508	NA	ENSGALG00000000456
13.40379247244	24.7772760023274	0	58.9014904298682	16.7803157883373	31.5913894473997	TMPRSS9	ENSGALG00000000458
195.695370097624	222.995484020946	156.223478131914	80.8647580477852	111.169592097734	132.109446780035	MRC2	ENSGALG00000000461
0.893586164829333	7.22670550067882	0	0	0	22.0182411300059	LCK	ENSGALG00000000466
0	0	0	0	73.4138815739755	0	ADRA1A	ENSGALG00000000469
7717.01011946612	4309.18125140477	9336.70558160676	9347.3670321162	8288.42722970184	9707.17239383736	LMNB2	ENSGALG00000000470
4165.89870043435	5290.98081299699	4842.92782208934	5392.98053054488	5461.99278910378	4159.53294390763	RPL36	ENSGALG00000000474
0	36.1335275033941	0	0	0	0	LRRTM4	ENSGALG00000000476
5.361516988976	8.25909200077579	47.0552644975646	18.9682765791101	7.34138815739755	36.3779636060966	TANC2	ENSGALG00000000478
18.765309461416	76.3966010071761	0	0.998330346268953	37.7557105237588	0.957314831739385	ACE	ENSGALG00000000498
0	0	0	50.9148476597166	13.634006578024	12.445092812612	ETV7	ENSGALG00000000504
58.0831007139066	0	22.586526958831	42.928204889565	226.534263142553	226.883615122234	KCNH6	ENSGALG00000000505
0	0	0	1.99666069253791	0	0	CPNE7	ENSGALG00000000507
1163.44918660779	1414.36950513286	1086.97660989374	1157.06487132572	830.625631522695	1224.40566979467	DCAF7	ENSGALG00000000510
483.430115172669	477.994949544899	287.978218725095	565.054975988227	273.728901297252	240.286022766586	KCTD20	ENSGALG00000000511
138.505855548547	209.574459519686	223.041953718456	115.806320167199	176.193315777541	58.3962047361025	ZNF276	ENSGALG00000000513
127.782821570595	69.1698955064973	190.103268570161	199.666069253791	83.9015789416863	56.4815750726237	FANCA	ENSGALG00000000516
718.443276522784	768.095556072149	1071.91892525452	924.45390064505	663.871243376093	724.687327626714	KLHL12	ENSGALG00000000518
84.8906856587866	164.149453515419	31.9975798583439	100.831364973164	57.6823355224093	28.7194449521815	STK38	ENSGALG00000000523
195.695370097624	117.692061011055	5.64663173970775	278.534166609038	92.2917368358549	150.298428583083	MAP3K3	ENSGALG00000000525
81.3163409994693	147.631269513867	97.8749501549343	137.769587785115	41.9507894708432	27.7621301204422	DBNDD1	ENSGALG00000000528
5899.45586020325	8027.83742475407	8673.2263521911	14106.4077927803	12535.9446636247	14862.3127627539	LIMD2	ENSGALG00000000529
6905.63388180108	5776.20246804257	5975.07748590075	6806.61630086172	7562.67857185625	7028.60549463056	SRSF3	ENSGALG00000000533
275.224538767435	458.379606043057	277.626060535631	203.659390638866	156.266690778891	152.213058246562	ERRFI1	ENSGALG00000000535
228.758058196309	307.651177028898	367.031063081004	519.131780059855	549.555342068045	438.450192936638	RNF113B	ENSGALG00000000538
377.093361557978	377.853459035493	402.793064099153	245.589265182162	271.631361823709	483.443990028389	GAS8	ENSGALG00000000540
1292.12559434322	992.123426593192	1547.17709667992	1700.15657969603	1446.25346700732	1929.9467007866	ZC3H11B	ENSGALG00000000541
1599.51923504451	1654.91555965545	1501.06293747231	1515.46546563627	1556.37428936828	1457.03317390734	ZNF593	ENSGALG00000000542
10.723033977952	0	22.586526958831	2.99499103880686	1.04876973677108	0	RAB44	ENSGALG00000000544
16.9781371317573	28.9068220027153	18.8221057990258	19.9666069253791	0	5.74388899043631	URAH	ENSGALG00000000549
3248.18570915462	3154.97314429635	3448.20978238153	2756.39008604858	2263.24509195199	2907.36514399251	STRADA	ENSGALG00000000550
491.472390656133	482.124495545287	304.918113944218	561.061654603151	439.434519707082	434.620933609681	C26H6orf89	ENSGALG00000000551
18.765309461416	13.4210245012607	0	31.9465710806065	8.39015789416863	5.74388899043631	ETNK2	ENSGALG00000000557
56.295928384248	0	0	0	0	0	SLC1A6	ENSGALG00000000558
19.6588956262453	68.1375090064003	33.8797904382465	0	0	0	PI16	ENSGALG00000000560
1295.69993900253	2012.121288689	1078.50666228418	1441.58902001237	1196.6462696558	1323.96641229557	CCDC47	ENSGALG00000000564
1.78717232965867	0	0	0	0	0	NA	ENSGALG00000000568
95.6137196367386	135.242631512704	232.453006617969	112.811329128392	54.5360263120961	9.57314831739385	PER3	ENSGALG00000000573
223.396541207333	107.368196010085	104.462687184593	348.417290847864	55.5847960488672	171.35935488135	RRNAD1	ENSGALG00000000576
2004.31376771219	1931.59514168144	1672.34410024344	1883.84936340951	1747.25038146062	1816.02623580961	RANBP3	ENSGALG00000000577
221.609368877675	248.805146523371	203.278742629479	208.651042370211	134.242526306698	155.08500274178	VAMP3	ENSGALG00000000579
2000.73942305288	1066.45525460017	1525.53167501104	1280.85783426307	1351.86419069792	1374.70409837776	DDX42	ENSGALG00000000581
0	0	0	1.99666069253791	1.04876973677108	0	SOX13	ENSGALG00000000583
19.6588956262453	57.8136440054306	0	0.998330346268953	0	1.91462966347877	PTPRVP	ENSGALG00000000584
195.695370097624	98.0767175092126	432.908433377594	264.557541761272	68.1700328901201	111.048520481769	MYL4	ENSGALG00000000585
0.893586164829333	8.25909200077579	0.941105289951291	1.99666069253791	1.04876973677108	6.70120382217569	BTN1A1	ENSGALG00000000589
2.680758494488	25.8096625024244	0	9.98330346268953	0	0	LOC426710	ENSGALG00000000593
497.727493809938	617.367127057991	884.638972554214	410.31377231654	1059.25743413879	488.230564187086	CDC27	ENSGALG00000000596
1.78717232965867	0	0	21.963267617917	23.0729342089637	1.91462966347877	MARCH2	ENSGALG00000000599
75.9548240104933	111.497742010473	110.109318924301	108.818007743316	3.14630921031324	256.560374906155	KANSL1	ENSGALG00000000603
4.46793082414666	0	0	2.99499103880686	0	0.957314831739385	NKAIN1	ENSGALG00000000604
409.262463491834	754.674531570888	195.749900309869	355.405603271747	195.071171039421	336.974820772263	ARL8A	ENSGALG00000000606
438.750806931202	1000.38251859397	217.395321978748	150.747882286612	873.625190730309	814.674921810216	GPR37L1	ENSGALG00000000607
739.889344478688	1242.99334611676	716.181125652933	726.784492083798	475.092690757299	404.94417382576	CDH1	ENSGALG00000000608
30.3819296041973	53.6840980050427	55.5252121071262	83.859749086592	117.462210518361	20.1036114665271	PPP1R15B	ENSGALG00000000611
6698.32189156068	5309.56376999874	6428.69023565727	6372.34260023473	5847.94005223554	7497.68976218286	RAB11B	ENSGALG00000000613
757.761067775274	950.827966589313	641.833807746781	352.41061223294	839.015789416863	684.48010469366	NWD1	ENSGALG00000000615
16.084550966928	136.275018012801	4.70552644975646	33.9432317731444	14.6827763147951	87.115649688284	ELF3	ENSGALG00000000616
1061.58036381725	1117.04219310493	1271.43324672419	666.88467130766	968.014467039706	1197.60085450597	ZCCHC17	ENSGALG00000000618
62.5510315380533	59.8784170056245	12.2343687693668	10.9816338089585	49.2921776282407	62.22546406306	ANGPTL4	ENSGALG00000000619
66.1253761973706	21.6801165020365	47.0552644975646	0	32.5118618399034	30.6340746156603	KANK3	ENSGALG00000000621
1.78717232965867	0	2.82331586985387	0.998330346268953	2.09753947354216	0.957314831739385	MAPT	ENSGALG00000000625
1791.64026048281	1437.08200813499	1186.73377062858	1083.18842570181	1689.56804593821	1400.55159883472	DNAJC11	ENSGALG00000000627
940.052645400458	969.410923591059	1259.19887795483	1344.75097642428	1006.81894730024	1041.55853693245	NDUFA7	ENSGALG00000000629
1611.13585518729	927.083077087083	1602.70230878705	1907.80929171997	1148.40286176433	1009.96714748505	CHTF8	ENSGALG00000000632
41.1049635821493	14.4534110013576	49.8785803674184	49.9165173134476	50.3409473650118	62.22546406306	MDM4	ENSGALG00000000636
65.2317900325413	74.3318280069821	10.3521581894642	127.786284322426	80.7552697313731	66.0547233900176	ZBTB48	ENSGALG00000000637
794.398100533277	577.104053554209	751.943126671082	1049.24519392867	876.771499940622	766.809180223247	UTP4	ENSGALG00000000638
11.6166201427813	0	0	0	182.485934198168	218.26778163658	LRRN2	ENSGALG00000000639
465.558391876082	75.3642145070791	284.21379756529	144.757900208998	51.3897171017829	312.084635147039	ANKS3	ENSGALG00000000643
0	8.25909200077579	10.3521581894642	1.99666069253791	4.19507894708432	9.57314831739385	NA	ENSGALG00000000645
2155.32982956835	2279.50939221412	2154.19000869851	2421.94942004848	1928.68754592201	1533.61836044649	NIP7	ENSGALG00000000650
612.106522908093	842.427384079131	699.241230433809	1023.28860492568	792.869920998936	848.180940921095	ACOT7	ENSGALG00000000652
0	5.16193250048487	0	0	0	35.4206487743572	TMED6	ENSGALG00000000654
273.437366437776	234.351735522013	256.921744156703	290.514130764265	152.071611831806	247.944541420501	TERF2	ENSGALG00000000657
5690.35669763319	5623.40926602822	5940.25659017255	5803.29430286142	3829.05830895121	5135.9940722818	CYB5B	ENSGALG00000000660
1824.7029485815	1521.73770114294	1653.52199444442	2146.41024447825	1816.46918408751	1409.16743232037	RBBP5	ENSGALG00000000668
14.2973786372693	8.25909200077579	31.0564745683926	0.998330346268953	16.7803157883373	26.8048152887028	ETV3	ENSGALG00000000669
551.342663699698	570.909734553627	626.77612310756	475.205244824021	741.480203897153	844.351681594137	SCMH1	ENSGALG00000000672
344.030673459293	147.631269513867	9.41105289951291	254.574238298583	3.14630921031324	273.792041877464	MYO1D	ENSGALG00000000674
125.995649240936	100.141490509407	4.70552644975646	401.328799200119	4.19507894708432	76.5851865391508	CITED4	ENSGALG00000000678
685.380588424098	685.504636064391	931.694237051778	489.181869671787	476.14146049407	614.596121976685	PAK1	ENSGALG00000000681
10.723033977952	0	0	38.9348835044892	0	7.65851865391508	KLHDC8A	ENSGALG00000000684
299.351365217826	11.3562515010667	122.343687693668	381.36219227474	46.1458684179275	70.8412975487145	MAP3K14	ENSGALG00000000685
91.1457888125919	0	165.634531031427	78.8680973552473	0	78.4998162026296	GDPD4	ENSGALG00000000690
27.7011711097093	18.5829570017455	0	0	39.853249997301	0	CDK18	ENSGALG00000000692
1299.27428366185	1551.67690964575	1133.09076910135	1626.28013407212	1546.93536173734	1472.35021121517	NOB1	ENSGALG00000000693
45.572894406296	0	0	12.9782945014964	0	10.5304631491332	MFSD4A	ENSGALG00000000695
7398.89344478688	12413.415277166	3996.87416642313	8203.28045529198	10248.577867727	12410.6294786694	WWP2	ENSGALG00000000699
0	0	0	21.963267617917	0	0	SLC45A3	ENSGALG00000000703
984.731953641925	1036.51604609736	1393.77693441786	1188.01311206005	1094.91560518901	1216.74715114076	PSMD7	ENSGALG00000000707
1153.61973879467	1328.68142562481	1976.32110889771	1380.69086888996	1596.22753936558	1551.80734224954	NUCKS1	ENSGALG00000000708
427.134186788421	337.590385531711	411.263011708714	576.036609797186	664.920013112864	291.981023680512	NA	ENSGALG00000000712
232.332402855627	67.1051225063033	535.488909982285	168.717828519453	234.924421036722	211.566577814404	ZFHX3	ENSGALG00000000713
1995.3779060639	2293.96280321548	2606.86165316508	2209.30505629319	2746.72794060346	2151.0864269184	RPL22	ENSGALG00000000719
32.169101933856	0	0	36.9382228119512	0	0	GBP1	ENSGALG00000000720
177.823646801037	387.144937536365	28.2331586985387	245.589265182162	34.6094013134456	57.4388899043631	NA	ENSGALG00000000721
131.357166229912	5.16193250048487	28.2331586985387	61.8964814686751	0	89.0302793517628	EAAT5L	ENSGALG00000000722
2294.72927128173	1886.17013567717	2568.27633627707	2723.4451846217	3045.62731558321	2887.26153252598	STX12	ENSGALG00000000723
1273.3602848818	524.452342049263	490.315856064623	1027.28192631075	843.210868363947	555.242602408843	PM20D1	ENSGALG00000000724
5826.18179468725	7354.72142669085	6858.77535316501	6692.80664138706	7814.38330868131	8593.81524452446	ELAVL1	ENSGALG00000000726
1891.7219109437	2024.50992669017	1686.46067959271	1040.26022081225	1384.37605253782	1309.60668981948	PPP1R8	ENSGALG00000000729
4.46793082414666	21.6801165020365	12.2343687693668	0	14.6827763147951	2.87194449521815	THEMIS2	ENSGALG00000000731
3921.94967743594	4147.09657088955	4478.7200748782	4206.96407917737	3860.52140105434	4403.64822600117	RPA2	ENSGALG00000000734
27.7011711097093	0	0	48.9181869671787	93.340506572626	0	MATK	ENSGALG00000000736
877.501613862405	722.670550067882	657.832597675953	628.94811814944	532.775026279708	724.687327626714	SMPDL3B	ENSGALG00000000737
73.2740655160053	65.0403495061094	60.2307385568826	54.9081690447924	74.4626513107466	66.0547233900176	APBA3	ENSGALG00000000740
48.253652900784	7.22670550067882	174.104478640989	28.9515800417996	117.462210518361	56.4815750726237	CHD5	ENSGALG00000000747
25.0204126152213	87.7528525082428	0.941105289951291	85.8564097791299	1.04876973677108	33.5060191108785	TJP3	ENSGALG00000000748
643.38203867712	349.979023532874	817.820496967672	787.682643206204	564.238118382841	1140.16196460161	ARNT	ENSGALG00000000751
126.889235405765	37.1659140034911	237.158533067725	110.814668435854	160.461769725975	200.078799833531	ACER3	ENSGALG00000000755
730.953482830394	687.569409064585	603.248490858778	534.10673525389	232.82688156318	308.255375820082	TSKU	ENSGALG00000000761
2700.41739011424	3149.81121179587	2322.64785559979	2510.80082086642	2892.50693401464	2790.57273452031	SSR2	ENSGALG00000000764
70.5933070215173	134.210245012607	48.9374750774671	28.9515800417996	320.92353945195	283.365190194858	RAB7B	ENSGALG00000000769
402.1137741732	72.2670550067882	287.978218725095	481.195226901635	284.216598664962	147.426484087865	CTSS	ENSGALG00000000775
44.6793082414666	45.4250060042669	24.4687375387336	0.998330346268953	30.4143223663613	68.9266678852357	BRPF3	ENSGALG00000000776
1133.96084316842	1155.24049360851	1193.32150765824	901.492302680864	1103.30576308318	764.894550559769	EYA3	ENSGALG00000000777
125.995649240936	195.121048518328	94.1105289951291	119.799641552274	19.9266249986505	116.792409472205	PIP5K1C	ENSGALG00000000784
778.313549566349	548.197231551493	252.216217706946	472.210253785215	692.188026268912	421.218525965329	HYAL1	ENSGALG00000000785
638.020521688144	889.917163083592	1039.92134539618	963.388784149539	780.284684157683	672.035011881048	DHX38	ENSGALG00000000787
6134.46902155337	6345.047429596	6848.42319497555	5713.44457169722	5262.72653911727	6700.24650734395	DNAJC8	ENSGALG00000000790
1006.17802159783	656.597814061676	1051.21460887559	1372.70422611981	708.968342057249	907.534460488937	FAM72A	ENSGALG00000000791
3338.43791180239	3830.15391535978	6216.00044012828	4931.75191056863	4231.7858878713	5230.768240624	VPS72	ENSGALG00000000793
688.954933083416	490.383587546063	457.377170916328	487.185208979249	466.70253286313	492.059823514044	MFSD12	ENSGALG00000000795
1718.36619496681	2355.9059932213	1935.85358142981	1794.99796259158	1915.05353934399	1426.39909929168	DHODH	ENSGALG00000000802
16.084550966928	23.7448895022304	9.41105289951291	0	0	17.2316669713089	LOC100859850	ENSGALG00000000803
13.40379247244	0	1.88221057990258	0	0	0	LINGO3	ENSGALG00000000806
3998.79808761126	3718.6561733493	3010.59582255418	3424.27308770251	3274.25911819931	3703.85108399968	IST1	ENSGALG00000000811
6551.77376052867	8068.10049825786	6625.38124125709	7848.87318236651	9417.95223620429	8052.93236459171	OAZ1	ENSGALG00000000812
6791.25485270293	6051.84966356846	7723.65111463025	6048.88356804358	7390.68033502579	8337.2548696183	HNRNPR	ENSGALG00000000814
101.868822790544	113.562515010667	120.461477113765	152.74454297915	209.753947354216	121.578983630902	SRGAP2	ENSGALG00000000816
707.720242544832	738.156347569337	931.694237051778	703.822894119612	961.721848619079	669.16306738583	ZNF821	ENSGALG00000000817
4.46793082414666	0	9.41105289951291	37.9365531582202	0	3.82925932695754	LRRC32	ENSGALG00000000818
0	0	103.521581894642	116.804650513467	8.39015789416863	0	MYLKSML	ENSGALG00000000824
560.278525347992	419.148919039372	177.868899800794	508.150146250897	207.656407880674	274.749356709203	NA	ENSGALG00000000830
29.488343439368	34.0687545032002	31.9975798583439	51.9131780059855	34.6094013134456	17.2316669713089	PLEKHJ1	ENSGALG00000000835
95.6137196367386	34.0687545032002	131.754740593181	18.9682765791101	14.6827763147951	111.048520481769	THAP12	ENSGALG00000000838
1330.54979943088	422.246078539663	1532.1194120407	1199.99307621528	483.482848651467	623.21195546234	WNT11	ENSGALG00000000839
228.758058196309	437.731876041117	800.880601748549	250.580916913507	289.460447348818	336.017505940524	DOT1L	ENSGALG00000000843
0.893586164829333	8.25909200077579	0.941105289951291	2.99499103880686	1.04876973677108	1.91462966347877	UVRAG	ENSGALG00000000845
822.992857807816	879.593298082622	705.828967463468	892.507329564444	638.700769693587	446.108711590553	GARNL3	ENSGALG00000000847
2527.06167413735	1453.60019213654	1009.80597611774	1021.29194423314	1451.49731569117	1191.85696551553	AP1G1	ENSGALG00000000848
923.074508268701	888.884776583495	900.637762483386	778.697670089783	1232.30444070602	1138.24733493813	SLC2A8	ENSGALG00000000853
1839.00032721877	2847.32196726746	2290.65027574144	2475.859258747	2321.97619721117	2441.15282093543	ZMPSTE24	ENSGALG00000000855
2889.85765705806	3349.06180631458	3201.64019641429	2447.90600905147	2942.84788137965	3616.7354343114	EIF2D	ENSGALG00000000856
1735.34433209856	1387.52745613033	1925.50142324034	1847.90947094383	1168.32948676298	1863.89197739658	NMT1	ENSGALG00000000857
803.33396218157	1344.16722312626	1118.97418975209	754.737741779328	874.67396046708	1494.36845234518	RLF	ENSGALG00000000862
1.78717232965867	8.25909200077579	0.941105289951291	0	1.04876973677108	0	DYRK3	ENSGALG00000000863
1329.65621326605	1351.39392862694	1142.50182200087	1404.65079720042	670.16386179672	1314.39326397818	FBXW2	ENSGALG00000000864
2102.60824584342	2792.60548276232	2605.92054787513	1472.53726074671	1313.05971043739	1972.06855338313	SELENBP1	ENSGALG00000000866
418.198325140128	517.225636548584	370.795484240809	659.896358883778	514.9459407546	460.468434066644	RNF175	ENSGALG00000000868
125.102063076107	407.792667538305	79.9939496458598	106.821347050778	179.339624987855	204.865373992228	DCAKD	ENSGALG00000000870
125.102063076107	166.214226515613	55.5252121071262	89.8497311642057	46.1458684179275	18.1889818030483	PHLPP2	ENSGALG00000000875
314.542330019925	252.934692523759	305.85921923417	461.228619976256	342.947703924143	508.334175653613	GPATCH3	ENSGALG00000000881
44.6793082414666	15.4857975014546	11.2932634794155	74.8747759701715	81.8040394681442	22.0182411300059	MAPKAPK2	ENSGALG00000000883
2301.87796060036	2521.08783323681	3296.69183069937	1438.59402897356	1581.54476305079	2109.9218891536	CXXC5	ENSGALG00000000884
25.0204126152213	0	0.941105289951291	29.9499103880686	1.04876973677108	3.82925932695754	NR0B2	ENSGALG00000000887
520.067147930672	741.253507069628	460.200486786181	403.325459892657	604.091368380141	438.450192936638	NSUN5	ENSGALG00000000891
0	0	0	8.98497311642057	0	0	TAT	ENSGALG00000000893
291.309089734362	84.6556930079519	239.040743647628	134.774596746309	121.657289465445	374.310099210099	NA	ENSGALG00000000894
4240.95993828001	4599.28185793202	5346.41915221329	5268.18923726126	4374.41857207217	5007.71388482872	NUDC	ENSGALG00000000895
383.348464711784	144.534110013576	297.389271624608	162.727846441839	145.77899341118	205.822688823968	KDF1	ENSGALG00000000902
1067.83546697105	933.277396087665	1101.09318924301	989.345373152532	759.309289422261	1052.08900008158	TERF2IP	ENSGALG00000000903
10739.1185289189	12119.1851246384	15024.7459540724	15045.8366486194	11156.8124597707	15080.5805443905	PSMB4	ENSGALG00000000905
210.886334899723	152.793202014352	129.872530013278	223.625997564245	225.485493405782	163.700836227435	RALGPS1	ENSGALG00000000906
7801.9008051249	8454.21304929412	8828.50872503306	8987.96810745938	7426.33850607601	9168.20414356809	KARS	ENSGALG00000000907
273.437366437776	168.278999515807	210.807584949089	182.694453367218	251.704736825059	493.017138345783	ADAT1	ENSGALG00000000908
41.1049635821493	67.1051225063033	39.5264221779542	41.929874543296	56.6335657856383	56.4815750726237	CHST6	ENSGALG00000000913
60.7638592083946	64.0079630060124	107.286003054447	96.8380435880884	18.8778552618794	42.1218525965329	CCDC103	ENSGALG00000000918
67.0189623622	131.113085512316	2.82331586985387	3.99332138507581	24.1217039457348	39.2499081013148	CGN	ENSGALG00000000920
1161.66201427813	3586.51070133689	434.790643957497	416.303754394153	618.774144694937	725.644642458454	ANGPTL2	ENSGALG00000000927
79.5291686698106	160.019907515031	86.5816866755188	59.8998207761372	34.6094013134456	109.13389081829	ZBTB43	ENSGALG00000000934
164.419854328597	132.145472012413	76.2295284860546	82.8614187403231	109.072052624192	142.639909929168	WDTC1	ENSGALG00000000943
2691.48152846595	3126.06632229364	4213.32838311193	2769.36838055007	3108.55349978948	3915.41766181408	SUPT4H1	ENSGALG00000000944
1376.12269383717	1863.45763267504	2678.38565520137	1900.82097929609	2436.29209851922	2678.5668992068	PFDN1	ENSGALG00000000946
27.7011711097093	60.9108035057215	12.2343687693668	38.9348835044892	0	59.3535195678419	HBEGF	ENSGALG00000000949
384.242050876613	344.817091032389	394.323116489591	569.048297373303	333.508776293203	224.011670627016	MVB12B	ENSGALG00000000950
788.142997379472	929.147850087277	513.843488313405	804.654259092776	658.627394692238	574.388899043631	TMEM222	ENSGALG00000000955
390.497154030418	468.703471044026	617.365070208047	464.223611015063	1055.06235519171	602.151029164073	PUS3	ENSGALG00000000962
183.185163790013	197.185821518522	257.862849446654	189.682765791101	153.120381568578	161.786206563956	NPHP4	ENSGALG00000000966
319.010260844072	251.902306023662	780.17628536962	267.552532800079	368.118177606649	435.57824844142	PBX3	ENSGALG00000000972
864.991407554794	827.973973077774	1149.08955903053	797.665946668893	979.550934144188	1036.77196277375	C21H1orf174	ENSGALG00000000975
245.736195328067	409.857440538499	250.334007127043	282.527487994114	413.215276287805	222.097040963537	MAPKAP1	ENSGALG00000000977
501.301838469256	673.115998063227	296.448166334657	632.941439534516	311.48461182101	543.754824427971	CEP104	ENSGALG00000000978
202.844059416259	523.419955549166	409.380801128812	524.1234317912	441.532059180624	557.157232072322	NA	ENSGALG00000000980
7146.00856014017	4742.7835814455	5534.64021020354	7304.78314364993	6847.41761137838	5930.56538262549	EFTUD2	ENSGALG00000000988
5728.78090272085	5805.10929004529	8069.97786133232	6928.41260310653	7869.96810473018	7929.43875129732	SRSF6	ENSGALG00000000990
1683.51633453846	2214.46904270801	2077.96048021245	1890.8376758334	2076.56407880674	1855.27614391093	TAF12	ENSGALG00000000991
1006.17802159783	565.747802053142	1412.59904021689	1014.30363180926	706.870802583707	1240.68002193424	GAPVD1	ENSGALG00000000993
0.893586164829333	5.16193250048487	1.88221057990258	1.99666069253791	0	0	RAB42	ENSGALG00000000994
1357.35738437576	1050.96945709872	978.749501549343	1526.44709944523	986.892322301585	1240.68002193424	AP3D1	ENSGALG00000000996
1505.69268773743	1847.97183517358	857.346919145626	784.687652167397	1449.39977621763	1206.21668799162	GJC3	ENSGALG00000000997
1072.3033977952	1107.75071460405	1527.41388559095	984.353721421187	1424.22930253513	1415.86863614255	MTFR1L	ENSGALG00000000998
65.2317900325413	147.631269513867	50.8196856573697	101.829695319433	22.0241644721927	26.8048152887028	ZNF319	ENSGALG00000000999
14597.623588652	17758.0801881681	11424.0771147187	8641.54747730406	11910.8779005091	17381.965399892	HSPA5	ENSGALG00000001000
1301.95504215634	831.071132578064	500.668014254087	650.911385767357	663.871243376093	428.877044619244	NA	ENSGALG00000001003
3.57434465931733	7.22670550067882	0	0	0	21.0609262982665	TP73	ENSGALG00000001006
1597.73206271485	1987.34401268668	1459.65430471445	1477.52891247805	1757.73807882833	2043.86716576359	PPP6C	ENSGALG00000001013
41.9985497469786	80.526147007564	52.7018962372723	76.8714366627094	97.5355855197104	66.0547233900176	ARPC5L	ENSGALG00000001014
167.100612823085	244.675600522983	216.454216688797	233.609301026935	343.996473660914	272.834727045725	WRAP73	ENSGALG00000001017
19.6588956262453	52.6517115049457	4.70552644975646	0	1.04876973677108	0	BTBD2	ENSGALG00000001019
23.2332402855627	0	50.8196856573697	9.98330346268953	0	17.2316669713089	MYOCD	ENSGALG00000001021
425.347014458762	518.258023048681	699.241230433809	745.752768662908	463.556223652817	858.711404070228	CCDC43	ENSGALG00000001022
828.354374796791	940.504101588344	906.284394223093	990.343703498801	1550.08167094765	944.869738926773	TPRG1L	ENSGALG00000001024
317.223088514413	328.298907030838	367.972168370955	507.151815904628	432.093131549685	531.309731615359	GOLGA1	ENSGALG00000001025
28.5947572745387	68.1375090064003	5.64663173970775	0.998330346268953	1.04876973677108	54.5669454091449	RNF43	ENSGALG00000001028
1120.55705069598	935.342169087859	968.397343359879	994.337024883877	1214.47535518091	1100.91205650029	SCAMP4	ENSGALG00000001030
16.9781371317573	0	3.76442115980516	0	0	0	HSF5	ENSGALG00000001031
288.628331239875	180.667637516971	272.920534085874	259.565890029928	256.948585508914	151.255743414823	AAR2	ENSGALG00000001034
1325.1882824419	1158.33765310881	802.762812328451	1332.77101226905	1036.18449992983	715.11417930932	ELAC2	ENSGALG00000001036
117.953373757472	177.57047801668	271.038323505972	181.696123020949	131.096217096385	259.432319401373	SCAI	ENSGALG00000001037
33.9562742635146	19.6153435018425	29.17426398849	54.9081690447924	17.8290855251083	81.3717606978477	MAN1C1	ENSGALG00000001038
189.440266943819	105.303423009891	1.88221057990258	156.737864364226	104.876973677108	86.1583348565446	MTMR4	ENSGALG00000001042
1295.69993900253	1780.86671266728	1159.44171721999	1875.86272063936	1631.8857104158	1447.46002558995	REXO1	ENSGALG00000001043
2246.47561838094	2507.66680873555	2373.46754125716	2179.35514590512	1924.49246697493	2205.65337232754	DLGAP4	ENSGALG00000001046
537.938871227258	312.813109529383	584.426385059752	554.073342179269	635.554460483274	852.967515079792	OLFML2A	ENSGALG00000001048
623.723143050874	720.605777067688	649.362650066391	826.617526710693	1233.35321044279	714.156864477581	CASP1	ENSGALG00000001049
392.284326360077	427.408011040147	283.272692275339	328.450683922485	370.215717080191	325.487042791391	LDLRAP1	ENSGALG00000001051
763.12258476425	775.322261572828	1053.09681945549	671.876323039005	872.576420993538	847.223626089356	C20H20ORF24	ENSGALG00000001054
1097.32381041042	1414.36950513286	752.884231961033	882.524026101754	868.381342046453	1256.95437407381	NSF	ENSGALG00000001055
143.867372537523	152.793202014352	119.520371823814	217.636015486632	428.946822339371	246.029911757022	ARHGEF16	ENSGALG00000001058
64.338203867712	58.8460305055275	0	81.8630883940541	191.924861829107	17.2316669713089	GGT7	ENSGALG00000001062
323.478191668218	592.589851055663	386.794274169981	633.939769880785	612.48152627431	514.07806464405	TMEM57	ENSGALG00000001067
76.8484101753226	54.7164845051396	58.3485279769801	1.99666069253791	3.14630921031324	140.72528026569	NR6A1	ENSGALG00000001073
42.892135911808	67.1051225063033	50.8196856573697	29.9499103880686	53.487256575325	46.9084267552299	LIMK1	ENSGALG00000001076
60.7638592083946	175.505705016486	10.3521581894642	23.9599283104549	148.925302621493	81.3717606978477	LOC107049128	ENSGALG00000001078
0	0	0	7.98664277015162	0	0	NR5A1	ENSGALG00000001080
16.9781371317573	2.06477300019395	8.46994760956162	47.9198566209097	19.9266249986505	24.890185625224	TTC34	ENSGALG00000001081
6.25510315380533	0	0	0	0	0	ATP8B3	ENSGALG00000001084
58.0831007139066	42.3278465039759	2.82331586985387	56.9048297373303	71.3163421004334	35.4206487743572	C26H1orf116	ENSGALG00000001091
11105.4888564989	9711.65980641224	10959.1711014828	9168.66590013406	7654.97030869211	12749.5189291051	TCF3	ENSGALG00000001093
32.169101933856	0	0	0	22.0241644721927	0	ADGRD2	ENSGALG00000001094
3050.70316672734	3485.33682432739	3205.4046175741	3258.55025022186	3583.64619054678	3379.32135604003	UQCR11	ENSGALG00000001096
1051.75091600412	1362.75018012801	1163.2061383798	1042.25688150479	1155.74424992173	893.174738012846	ANKHD1	ENSGALG00000001099
1217.06435649755	1049.93707059862	1696.81283778218	1566.38031329599	1460.93624332211	1492.4538226817	MBD3	ENSGALG00000001101
10760.5645968748	11167.324771549	13394.7515918767	12518.0642118664	10090.2136374746	14310.8994196721	PSMB7	ENSGALG00000001103
8.042275483464	19.6153435018425	11.2932634794155	1.99666069253791	30.4143223663613	6.70120382217569	NA	ENSGALG00000001106
1110.72760288286	847.589316579616	861.111340305431	819.62921428681	1199.79257886611	1039.64390726897	GOSR2	ENSGALG00000001107
20.5524817910747	15.4857975014546	0.941105289951291	0	106.97451315065	0	MIER2	ENSGALG00000001108
665.721692797853	1050.96945709872	1702.45946952189	591.01156499122	843.210868363947	1900.26994100268	GTSF1	ENSGALG00000001109
512.024872447208	154.857975014546	257.862849446654	512.143467635973	593.603671012431	497.80371250448	TYW1	ENSGALG00000001110
10.723033977952	0	0	0	0	57.4388899043631	NA	ENSGALG00000001111
51.8279975601013	0	93.1694237051778	36.9382228119512	7.34138815739755	25.8475004569634	PFKFB2	ENSGALG00000001117
5431.21670983268	5159.86772748468	4005.3441140327	4716.11255577453	4095.44582209106	4159.53294390763	NEK6	ENSGALG00000001118
2155.32982956835	1840.74512967291	1867.15289526336	1939.75586280057	1626.64186173194	1844.74568076179	SH3GL1	ENSGALG00000001121
28.5947572745387	5.16193250048487	189.16216328021	104.82468635824	102.779434203566	25.8475004569634	CALN1	ENSGALG00000001122
595.128385776336	387.144937536365	484.669224324915	451.245316513567	389.09357234207	448.023341254032	LHX2	ENSGALG00000001124
1794.3210189773	1189.30924811171	2045.96290035411	1903.81597033489	1391.71744069522	2338.72013393932	CHAF1A	ENSGALG00000001126
9.82944781312266	0	0	0	0	3.82925932695754	WBSCR17	ENSGALG00000001130
29.488343439368	0	27.2920534085874	12.9782945014964	3.14630921031324	92.8595386787203	LOC419390	ENSGALG00000001136
35.7434465931733	0	96.933844864983	0	0	26.8048152887028	HES5	ENSGALG00000001141
537.938871227258	457.34721954296	552.428805201408	276.5375059165	284.216598664962	605.980288491031	ETS1	ENSGALG00000001143
1052.64450216895	1396.81893463121	894.991130743678	1191.00810309886	1317.25478938448	805.101773492823	ZNF346	ENSGALG00000001144
672.870382116488	618.399513558088	653.127071226196	815.635892901734	847.405947311032	754.364087410635	UBXN6	ENSGALG00000001146
8.93586164829333	0	0	0	0	0	ADGRG5	ENSGALG00000001149
170.674957482403	158.987521014934	313.38806155378	121.796302244812	145.77899341118	117.749724303944	AUTS2	ENSGALG00000001153
1308.21014531014	699.958047065749	956.162974590512	1205.98305829289	742.528973633924	831.906588781525	DENND1A	ENSGALG00000001157
17.8717232965867	0	0.941105289951291	147.752891247805	5.2438486838554	4.78657415869692	UIMC1	ENSGALG00000001158
544.193974381064	460.444379043251	609.836227888437	511.145137289704	465.653763126359	529.39510195188	NA	ENSGALG00000001160
624.616729215704	692.73134156507	537.371120562187	577.034940143455	250.655967088288	226.883615122234	FLI1	ENSGALG00000001161
189.440266943819	113.562515010667	137.401372332889	203.659390638866	245.412118404432	206.780003655707	NDEL1	ENSGALG00000001163
371.731844569002	433.602330040729	434.790643957497	380.363861928471	348.191552607998	496.846397672741	PANK4	ENSGALG00000001165
5446.40767463478	4902.80348896053	6339.2852331119	5639.56812607331	4453.07630233	5551.46870925669	POLR2C	ENSGALG00000001168
4.46793082414666	0	82.8172655157136	40.9315441970271	16.7803157883373	9.57314831739385	CRB2	ENSGALG00000001169
6.25510315380533	0	0	0	1.04876973677108	0	SEMA6B	ENSGALG00000001171
21.446067955904	0	0	0	0	0	KBP	ENSGALG00000001172
788.142997379472	572.974507553821	671.949177025222	838.59749086592	329.313697346119	650.974085582782	RCC1L	ENSGALG00000001174
774.739204907032	904.37057408495	386.794274169981	490.180200018056	962.770618355851	707.455660655405	C4BPM	ENSGALG00000001175
187.65309461416	36.1335275033941	247.51069125719	258.567559683659	0	152.213058246562	CD34	ENSGALG00000001177
175.142888306549	10.3238650009697	156.223478131914	152.74454297915	0	140.72528026569	KCNJ5	ENSGALG00000001181
140.293027878205	121.821607011443	66.8184755865417	110.814668435854	116.41344078159	71.7986123804539	NCOA6	ENSGALG00000001182
10358.4508227016	8428.4033867917	9811.02264774221	11699.4333279259	8622.98477573181	13231.04828947	MYH10	ENSGALG00000001183
1690.6650238571	1658.01271915574	1699.63615365203	1704.1499010811	1543.78905252703	1324.92372712731	COQ9	ENSGALG00000001184
80.42275483464	65.0403495061094	41.4086327578568	8.98497311642057	84.9503486784574	78.4998162026296	NCF1C	ENSGALG00000001189
48.253652900784	0	85.6405813855675	57.9031600835993	19.9266249986505	33.5060191108785	MEOX1	ENSGALG00000001191
243.055436833579	170.343772516001	444.201696857009	195.672747868715	29.3655526295902	373.35278437836	GFOD2	ENSGALG00000001201
29.488343439368	14.4534110013576	0	0	0	0	TMEM45A	ENSGALG00000001203
119.740546087131	84.6556930079519	26.3509481186362	54.9081690447924	12.5852368412529	61.2681492313206	ENKD1	ENSGALG00000001204
0	0	0	0	137.388835517011	0	PLCH2	ENSGALG00000001207
8.042275483464	0	0	1.99666069253791	41.9507894708432	1.91462966347877	TP53INP2	ENSGALG00000001209
18.765309461416	0	11.2932634794155	2.99499103880686	0	0	PARD6A	ENSGALG00000001214
811.376237665034	568.844961553433	825.349339287282	352.41061223294	487.677927598552	476.742786206214	PIGU	ENSGALG00000001219
761.335412434592	1086.07059810202	415.027432868519	314.47405907472	524.384868385539	913.278349479373	HERPUD1	ENSGALG00000001220
1674.58047289017	1812.87069417029	1998.90763585654	1668.21000861542	1499.74072358264	1345.02733859384	PEX10	ENSGALG00000001223
330.626880986853	339.655158531905	303.977008654267	333.44233565383	137.388835517011	302.511486829646	RABGAP1	ENSGALG00000001225
1527.13875569333	1756.08943666495	1086.97660989374	812.640901862927	810.699006524044	975.503813542433	SKI	ENSGALG00000001229
119.740546087131	40.263073503782	65.8773702965904	124.791293283619	111.169592097734	178.060558703526	SAMHD1	ENSGALG00000001231
1974.82542427283	1857.26331367446	2061.02058499333	1639.25842857362	1872.05398013638	2478.48809937327	STX8	ENSGALG00000001238
118.846959922301	92.9147850087277	1.88221057990258	86.8547401253989	166.754388146602	43.0791674282723	LOC416147	ENSGALG00000001239
1511.94779089123	2620.19693724612	1246.02340389551	1843.91614955876	2455.1699537811	2919.81023680512	NA	ENSGALG00000001242
17.8717232965867	11.3562515010667	0	0	0	14.3597224760908	CFAP52	ENSGALG00000001244
2401.06602489642	2393.07190722479	2121.25132355021	2011.63564773194	1805.9814867198	2657.50597290853	SIRT6	ENSGALG00000001245
3919.26891894145	4291.63068090312	1640.3465203851	2777.35502332023	2737.28901297252	2397.11633867542	APLP2	ENSGALG00000001250
0	4.1295460003879	13.1754740593181	71.8797849313646	66.072493416578	0	CREB3L3	ENSGALG00000001252
328.839708657194	518.258023048681	471.493750265597	425.288727510574	718.407269688189	534.181676110577	RC3H2	ENSGALG00000001253
249.310539987384	502.772225547227	389.617590039835	372.377219158319	373.362026290504	274.749356709203	NUMA1	ENSGALG00000001258
11.6166201427813	0	0	0	0	18.1889818030483	NA	ENSGALG00000001261
209.099162570064	237.448895022304	242.805164807433	143.759569862729	304.143223663613	201.036114665271	CLIC4	ENSGALG00000001262
422.666255964274	219.898324520656	595.719648539167	531.111744215083	807.552697313731	554.285287577104	GTF2IRD1	ENSGALG00000001263
148.335303361669	252.934692523759	1026.74587133686	505.15515521209	297.850605242986	204.865373992228	PLXNA2	ENSGALG00000001264
125.102063076107	522.387569049069	581.603069189898	112.811329128392	252.75350656183	195.292225674834	MAP2K2	ENSGALG00000001267
41.9985497469786	82.5909200077579	78.1117390659572	58.9014904298682	77.6089605210598	143.597224760908	PRKCZ	ENSGALG00000001270
467.345564205741	229.189803021528	413.145222288617	528.116753176276	235.973190773493	209.651948150925	PDCL	ENSGALG00000001275
1.78717232965867	0	2.82331586985387	0	0	0	HOXB9	ENSGALG00000001276
216.247851888699	58.8460305055275	219.277532558651	122.794632591081	177.242085514312	158.914262068738	ZNF652	ENSGALG00000001279
3.57434465931733	0	0	2.99499103880686	0	0	GABRD	ENSGALG00000001282
809.589065335375	854.816022080295	719.004441522786	1262.88788803023	1412.69283543064	809.88834765152	SRRM1	ENSGALG00000001283
37.530618922832	0	22.586526958831	28.9515800417996	2.09753947354216	32.5487042791391	NA	ENSGALG00000001288
109.017512109179	52.6517115049457	320.91690387339	36.9382228119512	55.5847960488672	77.5425013708902	SHC2	ENSGALG00000001289
2.680758494488	3.09715950029092	12.2343687693668	4.99165173134476	32.5118618399034	11.4877779808726	GIP	ENSGALG00000001299
22.3396541207333	25.8096625024244	34.8208957281978	10.9816338089585	31.4630921031324	9.57314831739385	TMEM52	ENSGALG00000001304
466.451978040912	548.197231551493	206.102058499333	425.288727510574	128.998677622843	567.687695221455	NFRKB	ENSGALG00000001306
1493.18248142982	1690.01670065875	2237.00727421422	2067.542147123	1762.98192751218	2255.43374357799	SNF8	ENSGALG00000001309
20.5524817910747	29.9392085028123	0	35.9398924656823	73.4138815739755	0	TRNAU1AP	ENSGALG00000001310
0	0	0	0	0	1.91462966347877	ARHGAP44	ENSGALG00000001311
7628.54508914801	6438.99460110483	7205.10209986709	5818.26925805546	7180.92638767158	7710.21365482901	EIF4H	ENSGALG00000001313
569.214386996285	215.768778520268	352.914483731734	146.754560901536	170.949467093686	167.530095554392	PTGS1	ENSGALG00000001314
35.7434465931733	46.4573925043638	24.4687375387336	34.9415621194133	80.7552697313731	18.1889818030483	UBE2Z	ENSGALG00000001315
1264.42442323351	2305.31905471654	1349.54498579015	1051.24185462121	833.771940733008	1240.68002193424	CPNE2	ENSGALG00000001316
435.176462271885	639.047243560027	249.392901837092	341.428978423982	339.80139471383	396.328340340105	LOC428335	ENSGALG00000001317
0	0	5.64663173970775	0	0	0	CAMK1G	ENSGALG00000001319
11789.9758587582	16272.4760145285	11309.2622693447	12334.3714281529	12110.1441504956	16751.0949257758	BSG	ENSGALG00000001328
213.567093394211	190.99150251794	434.790643957497	184.691114059756	318.825999978408	144.554539592647	EPB41	ENSGALG00000001329
6665.25920346199	5632.70074452909	8409.71687100474	7793.96501332171	6553.76208508247	7271.76346189237	ATP5G1	ENSGALG00000001330
918.606577444554	1724.08545516195	894.991130743678	320.464041152334	587.311052591804	560.02917656754	ST14	ENSGALG00000001331
241.26826450392	270.485263025407	135.519161752986	395.338817122505	114.315901308048	146.469169256126	RBL1	ENSGALG00000001332
1118.76987836632	914.694439085919	1896.32715925185	1590.34024160644	797.06499994602	1322.05178263209	MRRFP1	ENSGALG00000001333
4376.78503533407	5117.5398809807	3686.30942073921	5514.77683278969	3974.83730236239	3939.35053260757	GNB1	ENSGALG00000001334
3271.41894944019	4293.69545390332	2536.27875641873	3224.60701844872	4268.49282865829	3494.19913584875	FAM18B1	ENSGALG00000001335
6.25510315380533	11.3562515010667	0	13.9766248477653	0	4.78657415869692	ZBTB44	ENSGALG00000001341
18.765309461416	0	60.2307385568826	0	11.5364671044819	2.87194449521815	HCN2	ENSGALG00000001342
1.78717232965867	2.06477300019395	0	0	2.09753947354216	0	LHX6	ENSGALG00000001347
167.994198987915	94.9795580089216	23.5276322487823	134.774596746309	105.925743413879	90.9449090152416	RSPRY1	ENSGALG00000001350
512.918458612037	815.58533507661	876.169024944652	408.317111624002	369.16694734342	532.267046447098	CLK3	ENSGALG00000001362
662.147348138536	685.504636064391	412.204116998666	890.510668871906	480.336539441154	610.766862649727	MYBBP1A	ENSGALG00000001363
520.067147930672	315.910269029674	625.835017817609	491.178530364325	638.700769693587	497.80371250448	CSNK1A1	ENSGALG00000001364
294.88343439368	154.857975014546	493.139171934477	352.41061223294	338.752624977059	492.059823514044	CASP9	ENSGALG00000001366
28.5947572745387	4.1295460003879	0	0	0	16.2743521395695	ADAMTS8	ENSGALG00000001370
2.680758494488	32.0039815030062	7.52884231961033	2.99499103880686	22.0241644721927	10.5304631491332	HS3ST3B1	ENSGALG00000001371
33.9562742635146	0	56.4663173970775	20.964937271648	0	28.7194449521815	TRAF3IP3	ENSGALG00000001373
218.035024218357	346.881864032583	242.805164807433	353.408942579209	303.094453926842	201.99342949701	NA	ENSGALG00000001374
536.1516988976	289.068220027153	579.720858609995	388.350504698623	123.754828938987	574.388899043631	COX10	ENSGALG00000001375
31.2755157690266	0	10.3521581894642	2.99499103880686	2.09753947354216	60.3108343995812	ARID3B	ENSGALG00000001376
1016.00746941095	430.505170540438	447.966118016815	939.428855839084	517.043480228142	548.541398586667	POLRMT	ENSGALG00000001377
12.5102063076107	26.8420490025213	15.0576846392207	26.9549193492617	0	9.57314831739385	NA	ENSGALG00000001378
22541.6045939847	18399.1922047283	23911.6032070824	19930.6670329134	17374.9682290865	24612.5643240196	NA	ENSGALG00000001381
830.14154712645	670.018838562936	1010.74708140769	1104.15336297346	1122.18361834505	814.674921810216	CDC2L1	ENSGALG00000001382
0	0	1.88221057990258	0	0	0	HTR4	ENSGALG00000001383
0	14.4534110013576	0	0	0	0	NA	ENSGALG00000001387
27.7011711097093	14.4534110013576	11.2932634794155	19.9666069253791	30.4143223663613	45.9511119234905	TTLL11	ENSGALG00000001389
0.893586164829333	0	0	3.99332138507581	0	9.57314831739385	PLLP	ENSGALG00000001391
17.8717232965867	0	145.87131994245	94.8413828955505	6.29261842062647	23.9328707934846	MMP23A	ENSGALG00000001392
1447.60958702352	1166.59674510958	1385.3069868083	1504.48383182731	771.894526263514	1274.18604104512	UBL7	ENSGALG00000001394
0.893586164829333	0	14.1165793492694	0	0	22.9755559617452	IRF6	ENSGALG00000001405
1858.65922284501	2879.32594877046	198.573216179722	779.696000436052	821.186703891755	1297.16159700687	ADAMTS15	ENSGALG00000001407
28.5947572745387	115.627288010861	70.5828967463468	87.8530704716678	186.681013145252	37.335278437836	SPNS3	ENSGALG00000001410
153.696820350645	182.732410517164	190.103268570161	350.413951540402	141.583914464096	339.846765267482	SEMA7A	ENSGALG00000001412
9.82944781312266	0	0	0	0	0	ADRA1B	ENSGALG00000001416
313.648743855096	160.019907515031	240.922954227531	298.500773534417	132.144986833156	375.267414041839	DAB2IP	ENSGALG00000001419
257.352815470848	164.149453515419	271.038323505972	183.692783713487	147.876532884722	305.383431324864	RALGAPB	ENSGALG00000001420
96.5073058015679	0	166.575636321379	386.353844006085	48.2434078914696	177.103243871786	SNX19	ENSGALG00000001425
302.925709877144	624.59383255867	408.43969583886	214.641024447825	127.949907886072	332.188246613567	EFHD1	ENSGALG00000001428
1039.24070969651	1547.54736364536	1672.34410024344	1411.6391096243	1163.08563807913	1510.64280448475	TTC1	ENSGALG00000001429
52.7215837249306	16.5181840015516	191.985479150063	136.771257438847	11.5364671044819	205.822688823968	B3GNTL1	ENSGALG00000001433
338.669156470317	74.3318280069821	198.573216179722	602.991529146447	84.9503486784574	196.249540506574	STOM	ENSGALG00000001434
47.3600667359546	92.9147850087277	32.9386851482952	132.777936053771	353.435401291854	427.919729787505	NTM	ENSGALG00000001437
75.9548240104933	57.8136440054306	54.5841068171749	14.9749551940343	200.315019723276	131.152131948296	RANBP10	ENSGALG00000001439
891.798992499674	1226.47516211521	1475.65309464362	1302.82110188098	917.673519674694	1380.44798736819	UBE2G1	ENSGALG00000001441
17.8717232965867	0	45.173053917662	119.799641552274	26.219243419277	65.0974085582782	OPCML	ENSGALG00000001442
21.446067955904	0	8.46994760956162	20.964937271648	14.6827763147951	44.9937970917511	FABP6	ENSGALG00000001445
5758.26924616022	4975.07054396732	5698.39253065507	3995.31804576835	3891.98449315747	5981.30306870768	GSN	ENSGALG00000001446
963.285885686021	735.059188069046	315.270272133683	590.013234644951	632.408151272961	1573.82558337955	STRA6	ENSGALG00000001449
8370.22160595636	8616.29772980935	9305.64910703837	9766.66577754916	8029.38110471938	8434.90098245572	ATP5PB	ENSGALG00000001452
419.985497469786	156.92274801474	375.501010690565	397.335477815043	25.1704736825059	17.2316669713089	TNNC1	ENSGALG00000001459
0	0	10.3521581894642	48.9181869671787	131.096217096385	5.74388899043631	ADORA3	ENSGALG00000001462
129.569993900253	111.497742010473	63.9951597166878	101.829695319433	75.5114210475177	62.22546406306	NA	ENSGALG00000001463
3169.55012664964	3544.18285483291	2840.255765073	4285.83217653261	4431.05213785781	2623.04263896591	RPL38	ENSGALG00000001465
21.446067955904	2.06477300019395	0	151.746212632881	128.998677622843	14.3597224760908	ANKFY1	ENSGALG00000001467
219.822196548016	635.950084059736	242.805164807433	141.762909170191	292.606756559131	201.036114665271	STOML1	ENSGALG00000001470
882.863130851381	1185.17970211133	460.200486786181	1404.65079720042	2033.56451959912	1330.66761611774	JAM3	ENSGALG00000001472
705.933070215173	281.841514526474	45.173053917662	403.325459892657	599.896289433057	464.297693393602	MIB2	ENSGALG00000001473
4887.91632161645	4382.48069291166	4120.15895940675	4774.01571585813	4962.77839440075	4656.37934158037	RAB14	ENSGALG00000001474
9839.27726093578	10564.4110554923	16886.252217596	15273.4559675687	17936.060038259	21144.2126886278	STMN1	ENSGALG00000001475
1312.67807613429	1140.78708260716	1753.27915517926	1108.14668435854	1378.0834341172	2073.54392554751	RAP1A	ENSGALG00000001476
1112.51477521252	1495.92803864052	1382.48367093845	1722.11984731394	1732.56760514582	1361.30169073341	CYB5D2	ENSGALG00000001479
91.1457888125919	150.728429014158	36.7031063081004	108.818007743316	104.876973677108	90.9449090152416	FAM212B	ENSGALG00000001480
264.501504789483	456.314833042863	174.104478640989	367.385567426975	249.607197351517	457.596489571426	LOC419409	ENSGALG00000001483
0	0	56.4663173970775	0	0	0	ZAP70	ENSGALG00000001486
713.081759533808	689.634182064779	421.615169898178	745.752768662908	630.310611799418	701.711771664969	SSU72	ENSGALG00000001489
297.564192888168	183.764797017261	77.1706337760059	455.238637898642	209.753947354216	69.8839827169751	NCAPD3	ENSGALG00000001491
3314.311085352	3765.11356585367	2770.6139736166	3541.07773821597	4760.36583520393	4615.21480381557	LOC107057310	ENSGALG00000001492
36.6370327580026	146.59888301377	61.1718438468339	87.8530704716678	40.9020197340721	38.2925932695754	MAPK3	ENSGALG00000001501
1029.41126188339	883.72284408301	1033.33360836652	1004.32032834657	1198.74380912934	1183.24113202988	UTP11	ENSGALG00000001502
1030.30484804822	658.66258706187	704.887862173517	799.662607361431	949.136611777826	627.041214789297	TBCD	ENSGALG00000001503
645.169211006778	897.143868584271	844.171445086308	573.041618758379	750.919131528093	871.15649688284	DDX20	ENSGALG00000001504
1745.17377991169	1474.24792213848	2101.48811246123	2669.53534592318	1728.37252619874	2034.29401744619	PTTG2	ENSGALG00000001506
672.870382116488	287.003447026959	1218.73135048692	945.418837916698	686.944177585057	1252.16779991512	CNTRL	ENSGALG00000001513
0	3.09715950029092	0	0	0	0	ZNF750	ENSGALG00000001518
134.931510889229	121.821607011443	81.8761602257623	122.794632591081	77.6089605210598	121.578983630902	VPS26B	ENSGALG00000001521
1040.13429586134	993.155813093289	1742.92699698979	1188.01311206005	1928.68754592201	1492.4538226817	PHF20	ENSGALG00000001522
520.960734095501	647.306335560803	199.514321469674	849.579124674879	508.653322333973	434.620933609681	CALCOCO2	ENSGALG00000001525
535.25811273277	986.961494092708	78.1117390659572	57.9031600835993	8.39015789416863	66.0547233900176	VWA1	ENSGALG00000001527
138.505855548547	169.311386015904	128.931424723327	160.731185749301	137.388835517011	134.981391275253	THYN1	ENSGALG00000001529
8.042275483464	0	43.2908433377594	12.9782945014964	0	21.0609262982665	FN3K	ENSGALG00000001531
8.042275483464	0	0	5.98998207761372	0	0	TSNAXIP1	ENSGALG00000001533
384.242050876613	288.035833527056	371.73658953076	163.726176788108	572.628276277009	248.90185625224	ARHGAP39	ENSGALG00000001536
293.989848228851	181.700024017067	122.343687693668	147.752891247805	304.143223663613	99.560742500896	ST7L	ENSGALG00000001538
4186.45118222542	4155.35566289032	5502.6426303452	3768.6970571653	4084.95812472335	4888.0495308613	SF3A3	ENSGALG00000001540
428.92135911808	507.934158047711	590.07301679946	587.018243606144	481.385309177925	525.565842624922	MRPL20	ENSGALG00000001542
3.57434465931733	0	52.7018962372723	4.99165173134476	0	0	RAB40B	ENSGALG00000001545
8.042275483464	26.8420490025213	0	27.9532496955307	7.34138815739755	48.8230564187086	NA	ENSGALG00000001546
2981.00344587065	3167.36178229752	2753.67407839748	2561.71566852613	3369.69716424548	2543.58550793155	CAPZA1	ENSGALG00000001547
4371.4235183451	4623.02674743425	4288.61680630803	4155.05090117138	4289.46822339371	4870.81786388999	RBM23	ENSGALG00000001550
223.396541207333	118.724447511152	419.732959318276	228.61764929559	386.996032868528	248.90185625224	CCNL2	ENSGALG00000001551
1729.08922894476	2417.84918322711	2439.34491155375	2009.6389870394	1702.15328277946	2097.47679634099	AURKAIP1	ENSGALG00000001555
1025.83691722407	1072.64957360076	986.278343868953	808.647580477852	896.698124939273	852.967515079792	ACAD8	ENSGALG00000001557
52.7215837249306	0	0	21.963267617917	159.412999989204	0	MOV10	ENSGALG00000001558
17.8717232965867	26.8420490025213	62.1129491367852	35.9398924656823	7.34138815739755	0	ZP3	ENSGALG00000001559
996.348573784706	1015.86831609542	459.25938149623	276.5375059165	194.02240130265	513.12074981231	MXRA8	ENSGALG00000001561
1307.31655914531	776.354648072925	1178.26382301902	1432.60404689595	1188.25611176163	1257.91168890555	WDR45B	ENSGALG00000001563
6.25510315380533	452.185287042475	63.0540544267365	73.8764456239025	204.51009867036	4.78657415869692	ATP2A3	ENSGALG00000001564
6.25510315380533	0	0.941105289951291	10.9816338089585	0	20.1036114665271	C5	ENSGALG00000001565
454.83535789813	337.590385531711	477.140382005305	359.398924656823	525.433638122311	229.755559617452	NFS1	ENSGALG00000001568
414.62398048081	597.751783556148	143.048004072596	318.467380459796	188.778552618794	234.542133776149	RHOC	ENSGALG00000001569
111.698270603667	0	0	90.8480615104747	159.412999989204	51.6950009139268	MYO1F	ENSGALG00000001571
2210.73217178777	3128.13109529383	2735.7930778884	2824.27654959487	2189.83121037801	2130.02550062013	COMMD4	ENSGALG00000001572
446.793082414666	227.125030021334	169.398952191232	492.176860710594	325.118618399035	210.609262982665	FOXK2	ENSGALG00000001577
227.86447203148	182.732410517164	28.2331586985387	292.510791456803	152.071611831806	32.5487042791391	TRAF1	ENSGALG00000001583
256.459229306019	215.768778520268	636.187176007073	399.332138507581	116.41344078159	455.681859907947	NEIL1	ENSGALG00000001586
925.755266763189	989.026267092901	1337.31061702078	1165.05151409587	1163.08563807913	1311.52131948296	NA	ENSGALG00000001587
2691.48152846595	4000.49768787578	3540.43810079676	3320.44673169054	4200.32279576817	3927.8627546267	UFD1L	ENSGALG00000001593
70.5933070215173	5.16193250048487	51.760790947321	16.9716158865722	0	20.1036114665271	PHF19	ENSGALG00000001595
37.530618922832	8.25909200077579	0	16.9716158865722	18.8778552618794	12.445092812612	MLLT1	ENSGALG00000001596
5829.75613934657	6268.65082858883	7470.49379163335	7004.28570942297	5610.91809172527	6907.9838258314	PSMB3	ENSGALG00000001597
8.93586164829333	25.8096625024244	38.5853168880029	28.9515800417996	0	0	DVL1	ENSGALG00000001600
6692.9603745717	5631.668358029	7078.05288572366	5838.23586498083	5886.74453249607	6612.17354282393	NUTF2	ENSGALG00000001602
458.409702557448	455.282446542766	473.375960845499	93.8430525492816	241.217039457348	188.591021852659	NARF	ENSGALG00000001603
351.179362777928	275.647195525892	336.915693802562	369.382228119512	646.042157850985	301.554171997906	GLB1L2	ENSGALG00000001604
381.561292382125	569.87734805353	453.612749756522	567.051636680765	581.018434171178	644.272881760606	INPP5B	ENSGALG00000001606
357.434465931733	276.679582025989	117.638161243911	224.624327910514	483.482848651467	208.694633319186	CYBC1	ENSGALG00000001607
26.80758494488	117.692061011055	2.82331586985387	27.9532496955307	23.0729342089637	22.9755559617452	B3GAT1	ENSGALG00000001611
3557.36652218557	3529.72944383156	5711.56800471439	5066.52650731493	4145.78676945608	4911.02508682304	GNL3	ENSGALG00000001613
1289.44483584873	1190.34163461181	864.875761465237	1256.89790595261	1109.5983815038	1002.30862883114	MAN2C1	ENSGALG00000001615
1016.00746941095	811.455789076222	550.546594621505	1457.56230555267	854.747335468429	740.961679766284	CDC45	ENSGALG00000001616
68.8061346918586	56.7812575053336	43.2908433377594	0	73.4138815739755	105.304631491332	CAMKK1	ENSGALG00000001617
36.6370327580026	38.1983005035881	26.3509481186362	107.819677397047	10.4876973677108	25.8475004569634	OGFOD3	ENSGALG00000001618
239.481092174261	147.631269513867	85.6405813855675	183.692783713487	267.436282876625	57.4388899043631	ATG16L2	ENSGALG00000001619
92.9329611422506	369.594367034717	90.346107835324	80.8647580477852	60.8286447327226	279.5359308679	CUTAL	ENSGALG00000001620
8.042275483464	0	0	43.9265352358339	11.5364671044819	1.91462966347877	CLDN5	ENSGALG00000001621
625.510315380533	511.031317548002	733.121020872056	472.210253785215	615.627835484623	828.077329454568	CWC25	ENSGALG00000001624
44.6793082414666	0	5.64663173970775	40.9315441970271	0	0	UTS2R	ENSGALG00000001626
2137.45810627176	2500.44010323487	2524.98549293931	3103.80904655017	2841.11721691285	3182.11450070172	NA	ENSGALG00000001630
786.355825049813	468.703471044026	950.516342850804	779.696000436052	624.017993378792	705.541030991927	NA	ENSGALG00000001632
57.1895145490773	262.226171024631	67.759580876493	11.9799641552274	0	0	DUSP26	ENSGALG00000001633
4901.32011408889	4630.25345293493	5877.20253574581	5260.20259449111	5251.19007201279	4297.3862796781	RPL23	ENSGALG00000001634
1650.45364643978	1931.59514168144	1558.47036015934	2158.39020863348	1528.05750647546	2054.39762891272	PSMD5	ENSGALG00000001637
659.466589644048	909.532506585434	634.30496542717	1054.23684566001	583.11597364472	878.815015536755	MTF1	ENSGALG00000001639
517.386389436184	831.071132578064	283.272692275339	688.847938925577	1089.67175650515	664.376493227133	RNF122	ENSGALG00000001640
3242.82419216565	4349.44432490855	2380.05527828682	2810.2999247471	5765.08724303062	4821.03749263954	GLT8D1	ENSGALG00000001642
560.278525347992	513.096090548196	255.0395335768	843.589142597265	750.919131528093	510.248805317092	SIN3A	ENSGALG00000001644
7.14868931863466	1.03238650009697	2.82331586985387	0	0	0	KCNT1	ENSGALG00000001645
75.061237845664	12.3886380011637	23.5276322487823	39.9332138507581	10.4876973677108	28.7194449521815	PSKH1	ENSGALG00000001647
168.887785152744	247.772760023274	243.746270097384	226.620988603052	29.3655526295902	355.163802575312	TTI2	ENSGALG00000001651
12987.3813196295	12634.3459881868	14930.6354250772	12151.6769747857	12174.1191044387	17860.6228157617	SEPT2L	ENSGALG00000001652
28.5947572745387	10.3238650009697	114.814845374058	198.667738907522	11.5364671044819	15.3170373078302	MANEAL	ENSGALG00000001653
820.312099313328	898.176255084368	909.107710092947	1287.84614668695	1000.52632887961	551.413343081886	C1QBP	ENSGALG00000001654
2301.87796060036	3125.03393579354	2373.46754125716	2845.24148686652	2909.28724980297	3278.80329870739	SPCS1	ENSGALG00000001655
16257.0130967401	19027.9155832873	18978.3292771577	17461.7960865902	19109.6333737058	15629.1219429772	RPL19	ENSGALG00000001658
0	3.09715950029092	0	0.998330346268953	0	0	SLC22A7	ENSGALG00000001661
11.6166201427813	0	0	0	0	0	ATP10B	ENSGALG00000001662
1016.00746941095	1524.83486064323	1233.78903512614	1525.44876909896	1138.96393413339	1346.94196825731	MAK16	ENSGALG00000001663
291.309089734362	353.076183033165	740.649863191666	391.345495737429	202.412559196818	279.5359308679	PTPN9	ENSGALG00000001664
80.42275483464	92.9147850087277	15.0576846392207	105.823016704509	3.14630921031324	27.7621301204422	RPAIN	ENSGALG00000001666
1989.12280291009	1587.81043714915	1376.83703919874	1123.12163955257	1060.30620387556	1323.96641229557	UBE2R2	ENSGALG00000001668
596.915558105994	571.942121053724	337.856799092514	535.105065600159	349.240322344769	512.163434980571	PRKAB2	ENSGALG00000001678
94.7201334719093	83.6233065078549	67.759580876493	63.893142161213	73.4138815739755	31.5913894473997	FBXL20	ENSGALG00000001682
4176.6217344123	3026.95721828433	2839.31465978305	3265.53856264574	2372.31714457618	2091.73290735056	SEC14L1	ENSGALG00000001684
3328.60846398926	8002.02776225165	2830.84471217348	6960.35917418714	9742.02208486655	9781.84295071303	SEPT5	ENSGALG00000001688
2255.41148002924	1480.44224113906	1157.55950664009	2195.32843144543	1627.69063146871	1964.41003472922	SCAMP2	ENSGALG00000001689
29.488343439368	0	55.5252121071262	0	0	0	GABRB2	ENSGALG00000001690
2533.31677729116	2357.97076622149	2919.30860942891	2478.85424978581	2066.07638143903	2194.16559434667	INTS11	ENSGALG00000001691
195.695370097624	105.303423009891	214.572006108894	307.485746650837	806.50392757696	282.407875363119	CAMSAP1	ENSGALG00000001692
53.61516988976	0	5.64663173970775	55.9064993910614	17.8290855251083	28.7194449521815	SLC18A1	ENSGALG00000001693
0	19.6153435018425	0	47.9198566209097	0	0	SAG	ENSGALG00000001696
9.82944781312266	0	1.88221057990258	0	0	2.87194449521815	GABRA1	ENSGALG00000001698
1.78717232965867	32.0039815030062	19.7632110889771	32.9449014268754	0	17.2316669713089	PUSL1	ENSGALG00000001701
339.562742635146	517.225636548584	497.844698384233	632.941439534516	453.068526285106	462.383063730123	EXOC3L1	ENSGALG00000001702
1659.38950808807	1125.3012851057	2069.49053260289	1838.92449782741	1113.79346045089	1278.01530037208	MED1	ENSGALG00000001708
41.1049635821493	8.25909200077579	133.636951173083	13.9766248477653	40.9020197340721	0	MUSTN1	ENSGALG00000001709
393.177912524906	562.650642552851	532.665594112431	877.532374370409	810.699006524044	419.303896301851	PPCDC	ENSGALG00000001711
211.779921064552	34.0687545032002	151.517951682158	162.727846441839	239.119499983806	229.755559617452	PUSL1	ENSGALG00000001714
3439.4131484281	2942.30152527638	1605.5256246569	3620.94416591749	2375.46345378649	1961.538090234	SLC16A1	ENSGALG00000001717
1670.11254206602	1667.30419765661	2025.25858397518	1520.45711736761	1539.59397357994	2160.65957523579	CCNG1	ENSGALG00000001718
2.680758494488	4.1295460003879	0	13.9766248477653	1.04876973677108	0	NA	ENSGALG00000001720
285.053986580557	466.638698043832	468.670434395743	397.335477815043	343.996473660914	191.462966347877	E2F4	ENSGALG00000001722
2.680758494488	0	0	0	0	0	FMO5	ENSGALG00000001723
370.838258404173	131.113085512316	759.471968990692	216.637685140363	468.800072336672	448.023341254032	TNRC6C	ENSGALG00000001725
935.584714576312	1330.746198625	721.82775739264	1252.90458456754	909.283361780526	953.485572412427	NUDCD2	ENSGALG00000001726
0.893586164829333	0	0	92.8447222030126	0	18.1889818030483	LZTS1	ENSGALG00000001727
8.042275483464	93.9471715088247	76.2295284860546	57.9031600835993	3.14630921031324	158.914262068738	NACC2	ENSGALG00000001728
5703.76049010563	6117.92239957467	4813.75355810085	5625.59150122555	5184.06880885944	5817.60223248024	CD276	ENSGALG00000001729
202.844059416259	277.711968526086	614.541754338193	320.464041152334	275.826440770794	310.170005483561	DGKD	ENSGALG00000001730
69.699720856688	49.5545520046548	107.286003054447	20.964937271648	28.3167828928191	48.8230564187086	CDK12	ENSGALG00000001731
98.2944781312266	19.6153435018425	155.282372841963	126.787953976157	217.095335511613	36.3779636060966	LRIG2	ENSGALG00000001733
0	0	5.64663173970775	0.998330346268953	0	0.957314831739385	NA	ENSGALG00000001734
282.373228086069	276.679582025989	519.490120053113	259.565890029928	690.09048679537	418.346581470111	RABEP1	ENSGALG00000001737
5.361516988976	0	0	0	0	6.70120382217569	NA	ENSGALG00000001740
3099.85040579296	3989.14143637471	2207.83301022573	1774.03302531993	2323.02496694794	2238.20207660668	NPTN	ENSGALG00000001741
398.539429513882	198.218208018619	132.695845883132	204.657720985135	96.4868157829393	14.3597224760908	ACSBG2	ENSGALG00000001749
514.705630941696	881.658071082816	683.242440504637	619.96314503302	547.457802594503	623.21195546234	MAT2B	ENSGALG00000001750
111.698270603667	103.238650009697	0	314.47405907472	73.4138815739755	125.408242957859	SFMBT1	ENSGALG00000001753
26.80758494488	27.8744355026183	21.6454216688797	5.98998207761372	5.2438486838554	39.2499081013148	QSOX2	ENSGALG00000001758
3.57434465931733	3.09715950029092	2.82331586985387	0.998330346268953	0	0	HCN4	ENSGALG00000001764
170.674957482403	98.0767175092126	82.8172655157136	253.575907952314	48.2434078914696	99.560742500896	CAAP1	ENSGALG00000001765
41.9985497469786	30.9715950029092	4.70552644975646	120.797971898543	4.19507894708432	73.7132420439326	TENM2	ENSGALG00000001768
77.741996340152	97.0443310091156	0	37.9365531582202	66.072493416578	29.6767597839209	NA	ENSGALG00000001770
176.036474471379	19.6153435018425	127.990319433376	198.667738907522	0	42.1218525965329	RFX2	ENSGALG00000001773
2275.07037565548	1599.16668865021	1844.56636830453	2754.39342535604	2615.63172350707	1951.00762708487	NEO1	ENSGALG00000001774
160.84550966928	228.157416521431	51.760790947321	139.766248477653	69.2188026268912	100.518057332635	MFSD11	ENSGALG00000001777
34.849860428344	0	36.7031063081004	12.9782945014964	17.8290855251083	16.2743521395695	KIAA0895L	ENSGALG00000001779
2754.92614616883	1292.54789812141	1464.35983116421	2074.53045954688	1043.52588808722	1897.39799650746	PLAA	ENSGALG00000001782
3961.26746868843	3630.90332084106	2013.02421520581	2944.07619114714	3564.7683352849	3369.74820772263	ADPGK	ENSGALG00000001788
213.567093394211	139.372177513092	252.216217706946	256.570898991121	119.559749991903	264.21889356007	METTL23	ENSGALG00000001790
654.105072655072	1193.4387941121	479.963697875159	579.031600835993	644.993388114214	758.193346737593	LOC415664	ENSGALG00000001791
8.93586164829333	19.6153435018425	17.8810005090745	30.9482407343375	29.3655526295902	16.2743521395695	MRPS34	ENSGALG00000001792
729.166310500736	187.894343017649	338.797904382465	265.555872107541	19.9266249986505	26.8048152887028	MYL10	ENSGALG00000001793
91.1457888125919	175.505705016486	26.3509481186362	241.595943797087	83.9015789416863	56.4815750726237	GPSM1	ENSGALG00000001797
984.731953641925	585.363145554984	835.701497476747	246.587595528431	1138.96393413339	397.285655171845	BBS4	ENSGALG00000001798
853.374787412013	895.079095584077	1228.14240338644	822.624205325617	488.726697335323	893.174738012846	DUS3L	ENSGALG00000001800
436.963634601544	211.63923251988	203.278742629479	645.919734036012	239.119499983806	428.877044619244	IFT74	ENSGALG00000001801
555.810594523845	418.116532539275	409.380801128812	825.619196364424	284.216598664962	330.273616950088	JMJD6	ENSGALG00000001802
3632.42776003124	4160.51759539081	3764.42115980516	3687.83229911751	3447.30612476654	4978.99443987654	IWS1	ENSGALG00000001803
15.1909648020987	28.9068220027153	24.4687375387336	9.98330346268953	38.8044802605299	14.3597224760908	MXRA7	ENSGALG00000001805
28.5947572745387	7.22670550067882	49.8785803674184	85.8564097791299	0	0.957314831739385	ATCAY	ENSGALG00000001812
193.908197767965	179.635251016874	293.624850464803	217.636015486632	148.925302621493	200.078799833531	MAGI3	ENSGALG00000001816
493.259562985792	379.918232035687	948.634132270902	590.013234644951	897.746894676044	657.675289404957	CTCF	ENSGALG00000001817
2370.68409529222	2435.39975372876	2705.67770860996	2403.97947381564	2023.07682223141	2200.86679816885	HIKESHI	ENSGALG00000001823
28.5947572745387	0	0	0.998330346268953	0	11.4877779808726	LOC100857820	ENSGALG00000001824
98.2944781312266	3.09715950029092	90.346107835324	30.9482407343375	32.5118618399034	15.3170373078302	WWC1	ENSGALG00000001826
87.5714441532746	12.3886380011637	0	14.9749551940343	4.19507894708432	20.1036114665271	NA	ENSGALG00000001828
1240.29759678311	1744.73318516389	2059.13837441343	1740.08979354678	1938.12647355295	2352.12254158367	PRKRIP1	ENSGALG00000001833
43.7857220766373	65.0403495061094	0	0	0	0	SCNN1D	ENSGALG00000001835
436.963634601544	716.4762310673	218.3364272687	435.272030973263	524.384868385539	476.742786206214	ORAI3	ENSGALG00000001837
1588.79620106655	923.985917586792	1176.38161243911	1312.80440534367	1000.52632887961	1342.15539409862	XPO7	ENSGALG00000001838
17.8717232965867	0	16.9398952191232	252.577577606045	0	15.3170373078302	TEK	ENSGALG00000001840
1069.62263930071	906.435347085143	1381.5425656485	1167.04817478841	741.480203897153	1803.581142997	ROGDI	ENSGALG00000001841
0.893586164829333	0	40.4675274679055	10.9816338089585	0	0	ALKBH4	ENSGALG00000001844
586.192524128042	501.73983904713	474.317066135451	791.675964591279	444.678368390938	452.809915412729	PHTF1	ENSGALG00000001845
1049.07015750964	933.277396087665	1379.66035506859	820.627544633079	1230.20690123248	865.412607892404	UBE2J2	ENSGALG00000001848
8.042275483464	0	0	0	0	0	NA	ENSGALG00000001849
3822.76161313989	2347.64690122052	4273.55912166881	3514.12281886671	2668.07021034563	3873.29580921755	RARS	ENSGALG00000001850
1267.10518172799	1095.36207660289	1743.86810227974	1560.39033121837	939.697684146887	1274.18604104512	LRWD1	ENSGALG00000001852
14.2973786372693	0	0	1.99666069253791	53.487256575325	9.57314831739385	NA	ENSGALG00000001856
34.849860428344	92.9147850087277	252.216217706946	0	5.2438486838554	61.2681492313206	FAM132A	ENSGALG00000001857
0.893586164829333	3.09715950029092	1.88221057990258	0	0	2.87194449521815	NA	ENSGALG00000001859
126.889235405765	45.4250060042669	345.385641412124	77.8697670089783	181.437164461397	150.298428583083	NA	ENSGALG00000001860
14.2973786372693	0	207.043163789284	0	0	17.2316669713089	ST6GALNAC1	ENSGALG00000001862
0	0	2.82331586985387	0	0	0	VTG2	ENSGALG00000001863
208.205576405235	112.53012851057	170.340057481184	249.582586567238	159.412999989204	79.4571310343689	CZH9orf72	ENSGALG00000001864
17.8717232965867	32.0039815030062	0	0	6.29261842062647	0	MCHR2	ENSGALG00000001866
0	119.756834011249	172.222268061086	0	0	24.890185625224	NA	ENSGALG00000001869
1834.53239639462	2127.74857669986	799.939496458598	1176.03314790483	1675.93403936018	1377.57604287297	SDF4	ENSGALG00000001872
112.591856768496	106.335809509988	28.2331586985387	0	11.5364671044819	23.9328707934846	RASA4B	ENSGALG00000001876
0	0	0	0	0	22.9755559617452	TNFRSF18	ENSGALG00000001882
38.4242050876613	24.7772760023274	0	63.893142161213	0	71.7986123804539	ST6GALNAC2	ENSGALG00000001883
15.1909648020987	16.5181840015516	34.8208957281978	48.9181869671787	0	0	UPK3BL	ENSGALG00000001885
38.4242050876613	5.16193250048487	42.3497380478081	13.9766248477653	41.9507894708432	1.91462966347877	CARD9	ENSGALG00000001889
72.380479351176	8.25909200077579	17.8810005090745	63.893142161213	14.6827763147951	15.3170373078302	CYGB	ENSGALG00000001892
28.5947572745387	0	29.17426398849	0	0	0	NA	ENSGALG00000001894
39.3177912524906	1.03238650009697	122.343687693668	105.823016704509	65.0237236798069	91.9022238469809	PANK3	ENSGALG00000001895
247.523367657725	231.254576021722	633.363860137219	224.624327910514	363.923098659564	343.676024594439	ARIH1	ENSGALG00000001901
695.210036237221	607.043262057021	845.112550376259	851.575785367417	310.435842084239	176.145929040047	DTX2	ENSGALG00000001905
444.112323920178	484.189268545481	534.547804692333	936.433864800278	882.015348624477	562.901121062758	WAPL	ENSGALG00000001907
243.949022998408	192.023889018037	284.21379756529	302.494094919493	185.632243408481	261.346949064852	SLIT3	ENSGALG00000001916
9.82944781312266	42.3278465039759	0.941105289951291	6.98831242388267	20.9753947354216	14.3597224760908	NA	ENSGALG00000001917
113.485442933325	195.121048518328	106.344897764496	85.8564097791299	67.1212631533491	29.6767597839209	DNAJB5	ENSGALG00000001918
106.336753614691	118.724447511152	140.224688202742	122.794632591081	157.315460515662	70.8412975487145	SDCCAG3	ENSGALG00000001921
906.096371136944	618.399513558088	733.121020872056	1057.23183669882	684.846638111515	891.260108349367	GNB1L	ENSGALG00000001925
370.838258404173	629.755765059154	337.856799092514	162.727846441839	242.265809194119	149.341113751344	HSPB1	ENSGALG00000001926
17.8717232965867	0	0	0	0	16.2743521395695	CORO2A	ENSGALG00000001933
0	2.06477300019395	0	0	0	0	NA	ENSGALG00000001935
774.739204907032	944.633647588732	702.064546303663	553.075011833	548.506572331274	566.730380389716	SLC25A24	ENSGALG00000001938
47.3600667359546	3.09715950029092	124.22589827357	101.829695319433	58.7311052591804	59.3535195678419	HIPK1	ENSGALG00000001939
713.081759533808	759.836464071373	1241.31787744575	1186.01645136752	711.065881530792	945.827053758512	SPDL1	ENSGALG00000001942
157.271165009963	80.526147007564	12.2343687693668	79.8664277015162	121.657289465445	9.57314831739385	RHBDF2	ENSGALG00000001943
167.994198987915	129.048312512122	72.4651073262494	115.806320167199	266.387513139854	12.445092812612	TBC1D2	ENSGALG00000001944
870.35292454377	424.310851539856	479.022592585207	489.181869671787	640.798309167129	683.522789861921	RFT1	ENSGALG00000001945
264.501504789483	70.2022820065943	73.4062126162007	130.781275361233	0	48.8230564187086	RSPO1	ENSGALG00000001946
2476.12726274208	1205.82743211327	954.280764010609	1728.10982939156	1490.3017959517	958.272146571124	IKBKAP	ENSGALG00000001947
829.247960961621	525.48472854936	936.399763501535	531.111744215083	846.357177574261	844.351681594137	SAFB2	ENSGALG00000001948
11368.2031889588	11809.4691746093	13640.380072554	12813.569994362	11475.6384597491	13073.091342233	MDH2	ENSGALG00000001949
637.126935523314	1094.32969010279	930.753131761827	953.40548068685	361.825559186022	610.766862649727	PMPCA	ENSGALG00000001950
64.338203867712	43.3602330040729	16.9398952191232	69.8831242388267	17.8290855251083	9.57314831739385	FAM102B	ENSGALG00000001951
1092.85587958627	619.431900058185	840.407023926503	1431.60571654968	471.946381546986	885.516219358931	APTX	ENSGALG00000001954
40.21137741732	44.3926195041699	23.5276322487823	5.98998207761372	20.9753947354216	29.6767597839209	AANAT	ENSGALG00000001955
13589.6583947245	16471.7266090472	8377.71929114639	11620.5652305706	9092.83361780526	9036.09469678805	OLFML3	ENSGALG00000001956
98.2944781312266	0	65.8773702965904	209.64937271648	74.4626513107466	231.670189280931	HENMT1	ENSGALG00000001959
6617.89913672604	5583.14619252444	7632.36390150497	7618.25887237838	7377.04632844777	9085.8750680385	PTBP1	ENSGALG00000001962
140.293027878205	21.6801165020365	46.1141592076133	97.8363739343574	26.219243419277	51.6950009139268	STYXL1	ENSGALG00000001963
309.180813030949	359.270502033747	261.627270606459	144.757900208998	138.437605253782	169.444725217871	INPP5E	ENSGALG00000001964
6558.9224498473	6431.76789560415	4457.07465320932	6274.50622630037	4760.36583520393	5381.06666920708	AARS1	ENSGALG00000001965
57.1895145490773	11.3562515010667	1.88221057990258	0	76.5601907842888	33.5060191108785	SYT6	ENSGALG00000001968
67.0189623622	123.886380011637	118.579266533863	114.80798982093	32.5118618399034	70.8412975487145	UBE2O	ENSGALG00000001971
1099.11098274008	1501.089971141	1329.78177470117	1317.79605707502	1221.81674333831	1437.88687727256	PRPF38B	ENSGALG00000001972
1239.40401061828	1049.93707059862	1147.20734845062	1421.62241308699	1039.33080914014	1300.03354150208	GNL2	ENSGALG00000001973
485.217287502328	356.173342533456	798.057285878695	583.024922221068	467.751302599901	498.76102733622	TMEM120A	ENSGALG00000001975
113.485442933325	16.5181840015516	145.87131994245	109.816338089585	45.0970986811564	160.828891732217	NA	ENSGALG00000001976
22.3396541207333	0	0	0	4.19507894708432	0	LDB3	ENSGALG00000001977
345.817845788952	322.104588030256	453.612749756522	322.460701844872	423.702973655516	353.249172911833	MED16	ENSGALG00000001978
439.644393096032	379.918232035687	277.626060535631	278.534166609038	182.485934198168	470.998897215777	PARP6	ENSGALG00000001981
95.6137196367386	6.19431900058185	0	40.9315441970271	0	0	FNDC7	ENSGALG00000001983
465.558391876082	580.2012130545	711.475599203176	538.100056638965	159.412999989204	907.534460488937	PIGQ	ENSGALG00000001985
7914.4926618934	5211.48705248953	4563.41955097381	7825.91158440232	4640.80608521202	4397.90433701073	VCP	ENSGALG00000001986
66.1253761973706	113.562515010667	18.8221057990258	61.8964814686751	42.9995592076142	37.335278437836	TXNRD2	ENSGALG00000001988
27367.863470228	48607.8535840658	27655.3200505086	23911.0101234877	23960.1934062721	39675.9132014388	PKLR	ENSGALG00000001992
45.572894406296	180.667637516971	31.0564745683926	8.98497311642057	6.29261842062647	5.74388899043631	LIMS2	ENSGALG00000001995
61.657445373224	138.339791012995	128.931424723327	176.704471289605	158.364230252433	198.164170170053	DNALI1	ENSGALG00000001996
1032.98560654271	184.797183517358	155.282372841963	1004.32032834657	227.583032879324	157.956947236999	R3HDM4	ENSGALG00000001998
12.5102063076107	0	57.4074226870288	10.9816338089585	53.487256575325	9.57314831739385	NA	ENSGALG00000002000
377.986947722808	479.027336044996	600.425174988924	412.310433009077	556.896730225443	755.321402242375	STXBP3	ENSGALG00000002001
1393.99441713376	1267.77062211908	1438.00888304557	1959.72246972595	1382.27851306428	1298.11891183861	BCAS2	ENSGALG00000002002
40.21137741732	42.3278465039759	9.41105289951291	3.99332138507581	0	29.6767597839209	BMPR1A	ENSGALG00000002003
31.2755157690266	12.3886380011637	59.2896332669313	6.98831242388267	216.046565774842	43.0791674282723	RNF157	ENSGALG00000002008
65.2317900325413	407.792667538305	192.926584440015	41.929874543296	71.3163421004334	177.103243871786	SNIP1	ENSGALG00000002010
82.2099271642986	0	138.34247762284	110.814668435854	29.3655526295902	101.475372164375	NA	ENSGALG00000002012
1673.68688672534	1863.45763267504	1693.04841662237	1291.83946807202	2533.82768403893	2141.513278601	MEAF6	ENSGALG00000002013
3396.52101251629	3027.98960478443	2300.06132864096	3712.79055777423	2312.53726958023	2824.07875363119	SMU1	ENSGALG00000002014
0	14.4534110013576	14.1165793492694	8.98497311642057	17.8290855251083	0	SNCG	ENSGALG00000002015
473.600667359546	349.979023532874	537.371120562187	391.345495737429	296.801835506215	360.907691565748	PRKCD	ENSGALG00000002016
256.459229306019	170.343772516001	267.273902346167	121.796302244812	138.437605253782	162.743521395695	CAPN15	ENSGALG00000002018
182.291577625184	82.5909200077579	193.867689729966	66.8881332000198	208.705177617445	25.8475004569634	ZC3H12A	ENSGALG00000002021
147.44171719684	137.307404512898	98.8160554448856	141.762909170191	104.876973677108	66.0547233900176	B4GALT1	ENSGALG00000002022
428.02777295325	913.662052585822	623.952807237706	225.622658256783	228.631802616095	484.401304860129	COMT	ENSGALG00000002024
15.1909648020987	0	0	0	0	28.7194449521815	GPRC5B	ENSGALG00000002028
38.4242050876613	22.7125030021334	0	7.98664277015162	25.1704736825059	6.70120382217569	TMEM259	ENSGALG00000002029
1713.89826414266	2194.85369920617	2012.08310991586	1961.71913041849	2121.66117748789	1463.73437772952	NDUFB6	ENSGALG00000002033
431.602117612568	220.930711020753	374.559905400614	573.041618758379	139.486374990554	354.206487743572	DENND2C	ENSGALG00000002038
680.912657599952	505.869385047517	1255.43445679502	1052.24018496748	1036.18449992983	1134.41807561117	KNOP1	ENSGALG00000002042
284.160400415728	412.95460003879	527.960067662674	300.497434226955	826.43055257561	331.230931781827	NA	ENSGALG00000002043
196.588956262453	343.784704532292	481.845908455061	189.682765791101	396.434960499468	158.914262068738	EEF2KMT	ENSGALG00000002044
332.414053316512	550.262004551687	567.486489840629	165.722837480646	112.218361834505	374.310099210099	SYT15	ENSGALG00000002046
39.3177912524906	0	0	32.9449014268754	1.04876973677108	32.5487042791391	GPRIN2	ENSGALG00000002048
3845.10126726062	3140.519733295	4493.77775951742	3630.92746938018	2679.60667745011	3738.3144179423	EXOC7	ENSGALG00000002050
1503.90551540777	1289.45073862112	1036.15692423637	1879.85604202444	1791.298710405	1501.06965616736	POR	ENSGALG00000002053
286.841158910216	230.222189521625	243.746270097384	550.080020794193	174.095776303999	500.675656999698	HES4	ENSGALG00000002055
422.666255964274	364.432434534232	743.47317906152	436.270361319532	256.948585508914	336.974820772263	TANGO2	ENSGALG00000002056
1750.53529690066	2003.86219668823	2077.0193749225	2397.98949173802	1743.05530251353	2273.62272538104	POLR2D	ENSGALG00000002057
5931.62496213711	5521.20300251862	6853.1287214253	6298.46615461082	6582.07886797529	8230.99292329523	TAF15	ENSGALG00000002060
1973.931838108	1782.93148566747	2015.84753107567	2517.7891332903	2098.58824327893	2212.35457614972	SRP68	ENSGALG00000002062
69.699720856688	86.7204660081458	51.760790947321	92.8447222030126	61.8774144694937	53.6096305774056	STOML2	ENSGALG00000002064
4090.83746258869	6072.4973935704	2616.27270606459	2374.02956342757	2918.72617743391	2478.48809937327	NCOA4	ENSGALG00000002066
538.832457392088	591.557464555566	544.899962881798	620.961475379289	419.507894708432	597.364455005376	ALG1	ENSGALG00000002067
2068.65197157991	1879.97581667659	2681.20897107123	2292.16647503352	1627.69063146871	2137.68401927405	SAP130	ENSGALG00000002070
0	0	0	0	25.1704736825059	0	DOCK2	ENSGALG00000002080
36.6370327580026	134.210245012607	4.70552644975646	0	87.0478881519996	67.9693530534963	MMP28	ENSGALG00000002081
25.9139987800507	0	8.46994760956162	43.9265352358339	0	0	AMPD1	ENSGALG00000002082
95.6137196367386	51.6193250048487	131.754740593181	82.8614187403231	42.9995592076142	89.0302793517628	FZR1	ENSGALG00000002085
215.354265723869	384.047778036074	284.21379756529	643.923073343474	361.825559186022	384.840562359233	RASL10B	ENSGALG00000002086
2060.60969609644	1091.2325306025	1056.8612406153	1341.75598538547	1521.76488805484	894.132052844585	NCBP1	ENSGALG00000002087
22.3396541207333	10.3238650009697	0	0	0	13.4024076443514	GALR2	ENSGALG00000002088
3514.47438627377	4394.86933091282	3669.36952552008	3576.01930033539	3475.62290765936	3495.15645068049	TIMM23B	ENSGALG00000002089
2225.92313658987	1813.90308067038	1612.11336168656	1798.99128397665	2469.85273009589	2116.62309297578	GPSM2	ENSGALG00000002090
54.5087560545893	137.307404512898	97.8749501549343	289.515800417996	122.706059202216	138.810650602211	NA	ENSGALG00000002091
156.377578845133	114.594901510764	56.4663173970775	45.9231959283718	203.461328933589	206.780003655707	TRMT2A	ENSGALG00000002094
2527.06167413735	2913.39470327366	3734.30579052672	2711.46522046648	3416.89180240018	4401.73359633769	CHMP4B	ENSGALG00000002095
612.106522908093	352.043796533068	255.0395335768	383.358852967278	419.507894708432	384.840562359233	PFKFB4	ENSGALG00000002099
16.9781371317573	8.25909200077579	17.8810005090745	49.9165173134476	0	0	TPPP3	ENSGALG00000002103
292.202675899192	39.230687003685	95.9927395750317	145.756230555267	160.461769725975	173.273984544829	CLCC1	ENSGALG00000002106
1613.81661368178	2163.88210420326	1763.63131336872	2236.25997564245	1467.22886174274	1968.23929405618	RANBP1	ENSGALG00000002107
0	0	0	0	0	26.8048152887028	EVPL	ENSGALG00000002108
124.208476911277	149.696042514061	48.9374750774671	87.8530704716678	62.9261842062647	113.920464976987	TSTD2	ENSGALG00000002110
13.40379247244	13.4210245012607	0	10.9816338089585	53.487256575325	34.4633339426179	CSF3R	ENSGALG00000002112
7.14868931863466	13.4210245012607	0	0	20.9753947354216	68.9266678852357	LCP2	ENSGALG00000002113
7.14868931863466	17.5505705016486	22.586526958831	11.9799641552274	26.219243419277	22.0182411300059	TEN1	ENSGALG00000002116
75.061237845664	14.4534110013576	32.9386851482952	13.9766248477653	83.9015789416863	30.6340746156603	PARG	ENSGALG00000002117
25.9139987800507	0	0	23.9599283104549	7.34138815739755	0	KCNMB1	ENSGALG00000002118
983.838367477095	696.860887565458	705.828967463468	663.889680268854	620.871684168479	636.614363106691	C14H16orf62	ENSGALG00000002119
18.765309461416	0	8.46994760956162	0	23.0729342089637	30.6340746156603	PLEKHN1	ENSGALG00000002121
663.040934303365	568.844961553433	540.194436432041	614.971493301675	768.748217053201	706.498345823666	OSCP1	ENSGALG00000002123
148.335303361669	157.955134514837	166.575636321379	108.818007743316	170.949467093686	50.7376860821874	ZDHHC8	ENSGALG00000002124
150.122475691328	9.29147850087277	14.1165793492694	55.9064993910614	1.04876973677108	0.957314831739385	TMOD1	ENSGALG00000002125
177.823646801037	133.17785851251	140.224688202742	137.769587785115	114.315901308048	173.273984544829	LSM10	ENSGALG00000002127
233.225989020456	251.902306023662	211.748690239041	123.79296293735	142.632684200867	183.804447693962	WDR47	ENSGALG00000002129
1336.80490258468	1126.3336716058	1411.65793492694	931.442213068933	1382.27851306428	1105.69863065899	NPRL2	ENSGALG00000002131
216.247851888699	76.3966010071761	186.338847410356	139.766248477653	99.6331249932525	119.664353967423	KCNIP1	ENSGALG00000002132
33.0626880986853	62.9755765059154	49.8785803674184	62.894811814944	32.5118618399034	57.4388899043631	NA	ENSGALG00000002134
109.017512109179	45.4250060042669	68.7006861664443	53.9098386985234	45.0970986811564	22.9755559617452	PGAM5	ENSGALG00000002137
58.976686878736	116.659674510958	85.6405813855675	98.8347042806263	83.9015789416863	79.4571310343689	HYAL2	ENSGALG00000002138
630.871832369509	347.91425053268	600.425174988924	362.39391569563	556.896730225443	355.163802575312	CSDE1	ENSGALG00000002139
151.016061856157	185.829570017455	255.980638866751	153.742873325419	135.291296043469	141.682595097429	UGGT1	ENSGALG00000002141
104.549581285032	130.080699012219	218.3364272687	100.831364973164	98.5843552564814	131.152131948296	DGKQ	ENSGALG00000002142
141.186614043035	94.9795580089216	70.5828967463468	51.9131780059855	262.19243419277	32.5487042791391	ANKLE2	ENSGALG00000002143
5860.13806895077	6271.74798808912	6236.70475650721	6512.10884871238	5787.11140750281	6889.79484402835	THRAP3	ENSGALG00000002144
145.654544867181	199.250594518716	36.7031063081004	96.8380435880884	74.4626513107466	153.170373078302	CAMSAP2	ENSGALG00000002145
386.029223206272	487.286428045772	514.784593603356	518.133449713586	296.801835506215	233.58481894441	SIKE1	ENSGALG00000002147
92.0393749774213	24.7772760023274	139.283582912791	156.737864364226	50.3409473650118	87.115649688284	CPEB1	ENSGALG00000002150
464.664805711253	634.917697559639	531.72448882248	374.373879850857	542.213953910648	471.956212047517	PEX12	ENSGALG00000002151
14.2973786372693	0	10.3521581894642	0	0	11.4877779808726	GABRP	ENSGALG00000002152
88.4650303181039	2.06477300019395	43.2908433377594	253.575907952314	76.5601907842888	83.2863903613265	HS6ST1	ENSGALG00000002155
7533.8249556761	8467.63407379538	6930.29935520131	8441.88140805026	9813.33842696699	5866.42528889895	RPS17	ENSGALG00000002157
228.758058196309	582.265986054694	335.03348322266	311.479068035913	389.09357234207	183.804447693962	GOLGA3	ENSGALG00000002158
1116.08911987184	1264.67346261879	992.866080898612	928.447222030126	893.551815728959	944.869738926773	ACOX1	ENSGALG00000002159
179.610819130696	194.088662018231	49.8785803674184	156.737864364226	174.095776303999	245.072596925283	B2M	ENSGALG00000002160
1431.52503605659	1313.19562812335	961.80960633022	1676.19665138557	1122.18361834505	1259.82631856903	ACO1	ENSGALG00000002162
739.889344478688	682.4074765641	483.728119034964	750.744420394252	492.921776282407	699.79714200149	DDX59	ENSGALG00000002164
14.2973786372693	1.03238650009697	0	0	0	49.780371250448	UNC13B	ENSGALG00000002165
67.0189623622	19.6153435018425	34.8208957281978	168.717828519453	0	63.1827788947994	PATL2	ENSGALG00000002167
1244.76552760726	911.597279585628	671.008071735271	822.624205325617	646.042157850985	639.486307601909	PLEKHB2	ENSGALG00000002169
2.680758494488	0	1.88221057990258	2.99499103880686	0	0	BARL	ENSGALG00000002170
966.860230345338	502.772225547227	567.486489840629	637.933091265861	421.605434181974	393.456395844887	FAM168B	ENSGALG00000002172
476.281425854034	253.967079023856	241.864059517482	756.734402471866	670.16386179672	352.291858080094	KIF14	ENSGALG00000002175
1415.44048508966	1270.86778161938	1312.84187948205	880.527365409216	1189.3048814984	922.851497796767	FBF1	ENSGALG00000002179
79.5291686698106	113.562515010667	72.4651073262494	93.8430525492816	96.4868157829393	54.5669454091449	CHFR	ENSGALG00000002180
14.2973786372693	0	0	0	0	0	NR5A2	ENSGALG00000002182
83.9970994939573	0	0	0	0	0	UNC45B	ENSGALG00000002186
3218.69736571526	1605.3610076508	2224.77290544485	2973.02777118894	1666.49511172924	2286.06781819365	HSD17B4	ENSGALG00000002187
7583.86578090655	8335.48860178297	7900.57890914109	8751.36381539364	7472.48437449394	11050.2851027677	SNX1	ENSGALG00000002189
27.7011711097093	61.9431900058185	0.941105289951291	2.99499103880686	8.39015789416863	8.61583348565446	PTPRC	ENSGALG00000002192
42.892135911808	101.173877009503	130.813635303229	0	6.29261842062647	188.591021852659	NA	ENSGALG00000002193
2141.92603709591	1840.74512967291	2366.8798042275	2202.31674386931	1845.8347367171	1972.06855338313	MRPL38	ENSGALG00000002194
12902.4906339707	12715.9045216944	15604.4668126824	14662.4777956521	15310.989387121	15338.0982341284	NPM1	ENSGALG00000002197
209.992748734893	485.221655045578	238.099638357677	152.74454297915	376.508335500817	131.152131948296	FHOD1	ENSGALG00000002198
139.399441713376	179.635251016874	79.0528443559085	141.762909170191	124.803598675758	142.639909929168	KLHL17	ENSGALG00000002199
128.676407735424	151.760815514255	105.403792474545	0	0	110.091205650029	PPL	ENSGALG00000002201
4.46793082414666	3.09715950029092	57.4074226870288	27.9532496955307	3.14630921031324	17.2316669713089	FGF18	ENSGALG00000002203
134.931510889229	222.995484020946	108.227108344398	68.8847938925577	95.4380460461682	156.04231757352	NA	ENSGALG00000002204
786.355825049813	880.625684582719	1355.19161752986	1075.20178293166	1401.15636832616	871.15649688284	FBRSL1	ENSGALG00000002205
10.723033977952	37.1659140034911	0	10.9816338089585	0	0	ATP6V1G3	ENSGALG00000002207
17449.0570406224	31580.7030379664	19570.2845045371	24794.5324799357	30239.1778203205	29303.4069995426	PPIB	ENSGALG00000002210
96.5073058015679	16.5181840015516	98.8160554448856	102.828025665702	106.97451315065	67.9693530534963	NEK7	ENSGALG00000002216
364.583155250368	518.258023048681	369.854378950857	481.195226901635	468.800072336672	484.401304860129	WBP2	ENSGALG00000002219
386.029223206272	1180.01776961084	1533.06051733065	381.36219227474	1138.96393413339	1257.91168890555	NOC2L	ENSGALG00000002222
126.889235405765	27.8744355026183	544.899962881798	140.764578823922	0	21.0609262982665	LHX9	ENSGALG00000002223
391.390740195248	683.439863064197	308.682535104024	299.499103880686	242.265809194119	685.4374195254	RFFL	ENSGALG00000002225
36.6370327580026	112.53012851057	152.459056972109	105.823016704509	110.120822360963	33.5060191108785	DMXL1	ENSGALG00000002227
372.625430733832	242.610827522789	768.883021890205	758.731063164404	581.018434171178	543.754824427971	FBXW11	ENSGALG00000002229
68.8061346918586	133.17785851251	100.698266024788	76.8714366627094	32.5118618399034	90.9449090152416	RERE	ENSGALG00000002232
41.1049635821493	125.951153011831	51.760790947321	0	0	13.4024076443514	UNC13D	ENSGALG00000002234
3486.77321516406	3738.27151685114	3305.16177830893	2817.28823717098	2863.14138138505	4395.03239251552	ATP6V0D1	ENSGALG00000002237
134.0379247244	166.214226515613	244.687375387336	165.722837480646	56.6335657856383	210.609262982665	REXO5	ENSGALG00000002239
19.6588956262453	0	6.58773702965904	17.9699462328411	7.34138815739755	15.3170373078302	C12H3orf18	ENSGALG00000002240
176.036474471379	86.7204660081458	93.1694237051778	86.8547401253989	44.0483289443853	20.1036114665271	GALNT9	ENSGALG00000002242
12.5102063076107	0	2.82331586985387	0.998330346268953	14.6827763147951	0	AGRP	ENSGALG00000002244
87.5714441532746	21.6801165020365	16.9398952191232	69.8831242388267	18.8778552618794	35.4206487743572	DENND1B	ENSGALG00000002246
495.04673531545	391.274483536753	257.862849446654	441.262013050877	484.531618388238	632.785103779733	SETD6	ENSGALG00000002247
612.106522908093	591.557464555566	569.368700420531	723.789501044991	760.358059159032	487.273249355347	AGO1	ENSGALG00000002249
192.121025438307	78.4613740073701	94.1105289951291	143.759569862729	149.974072358264	108.17657598655	DTWD2	ENSGALG00000002250
271.650194108117	230.222189521625	270.097218216021	300.497434226955	260.094894719228	364.736950892706	HEMK1	ENSGALG00000002253
7.14868931863466	0	3.76442115980516	19.9666069253791	28.3167828928191	0	CISH	ENSGALG00000002260
231.438816690797	506.901771547614	293.624850464803	205.656051331404	332.460006556432	270.920097382246	ETF1	ENSGALG00000002262
17.8717232965867	0	31.0564745683926	0	7.34138815739755	0	KLHL6	ENSGALG00000002263
79.5291686698106	111.497742010473	149.635741102255	42.928204889565	2.09753947354216	8.61583348565446	OGDHL	ENSGALG00000002266
263.607918624653	261.193784524535	211.748690239041	169.716158865722	297.850605242986	313.041949978779	DCUN1D3	ENSGALG00000002267
4399.12468945481	5424.1586715095	3206.34572286405	3485.17123882491	4466.71030890803	4570.22100672382	NOC4L	ENSGALG00000002272
283.266814250899	180.667637516971	344.444536122173	373.375549504588	348.191552607998	351.334543248354	LYRM1	ENSGALG00000002273
25.0204126152213	0	53.6430015272236	194.674417522446	70.2675723636623	73.7132420439326	EME2	ENSGALG00000002276
2669.14187434522	2157.68778520268	3032.24124422306	1936.76087176177	1480.86286832076	2126.19624129317	KLHL24	ENSGALG00000002277
63.4446177028826	34.0687545032002	74.347317906152	65.8898028537509	126.901138149301	141.682595097429	UNK	ENSGALG00000002278
21.446067955904	23.7448895022304	9.41105289951291	29.9499103880686	77.6089605210598	12.445092812612	TMEM200A	ENSGALG00000002282
235.013161350115	323.136974530353	193.867689729966	347.418960501596	78.6577302578309	144.554539592647	MAPKAPK3	ENSGALG00000002283
3698.55313622861	4496.04320792232	5322.8915199645	3799.64529789963	4994.24148650388	5694.10861918586	TRAPPC3	ENSGALG00000002284
1125.91856768496	1552.70929614585	1789.98226148736	955.402141379388	479.287769704383	1682.95947419784	SPSB3	ENSGALG00000002285
28753.8156118783	31969.912748503	46542.3621145411	32809.1284997829	35967.5581225642	51141.6729411814	H3F3B	ENSGALG00000002286
1118.76987836632	974.572856091544	1175.44050714916	1481.52223386313	1627.69063146871	1050.17437041811	LIG3	ENSGALG00000002288
9.82944781312266	0	0	0	6.29261842062647	0	CHAT	ENSGALG00000002289
2460.04271177515	2473.59805423235	1456.8309888446	2203.31507421558	948.087842041055	1468.52095188822	SEMA6A	ENSGALG00000002294
23.2332402855627	18.5829570017455	3.76442115980516	34.9415621194133	38.8044802605299	16.2743521395695	COL8A2	ENSGALG00000002298
9.82944781312266	0	0	0	0	0	RGR	ENSGALG00000002299
2098.14031501927	1507.28429014158	2476.9891231518	1830.93785505726	2306.2446511596	1493.41113751344	CNOT1	ENSGALG00000002301
2077.5878332282	1991.47355868706	2312.29569741032	2480.85091047835	2075.51530906997	2313.82994831409	ADPRHL2	ENSGALG00000002304
34.849860428344	9.29147850087277	0	0	19.9266249986505	25.8475004569634	ZBTB41	ENSGALG00000002305
1441.35448386971	961.151831590283	1507.65067450197	2666.54035488437	975.355855197103	1522.13058246562	COMMD10	ENSGALG00000002308
178.717232965867	345.849477532486	168.457846901281	245.589265182162	200.315019723276	274.749356709203	GALK1	ENSGALG00000002311
0	0	66.8184755865417	7.98664277015162	0	30.6340746156603	TMEM132E	ENSGALG00000002312
285.947572745386	495.545520046548	281.390481695436	376.370540543395	385.947263131757	255.603060074416	SLC38A7	ENSGALG00000002313
169.781371317573	235.38412202211	156.223478131914	269.549193492617	183.534703934939	307.298060988343	PARL	ENSGALG00000002315
579.937420974237	610.140421557312	599.484069698972	359.398924656823	504.458243386889	283.365190194858	NUBP2	ENSGALG00000002316
19.6588956262453	0	0	21.963267617917	0	0	LVRN	ENSGALG00000002318
2.680758494488	0	0	14.9749551940343	0	99.560742500896	TEKT2	ENSGALG00000002319
11753.3388260002	12042.7885236312	13760.8415496678	14405.906896661	13567.9340846074	13733.6385761332	GOT2	ENSGALG00000002321
375.30618922832	175.505705016486	120.461477113765	162.727846441839	207.656407880674	230.712874449192	ATP8B4	ENSGALG00000002326
0	0	0	0	0	42.1218525965329	DOCK3	ENSGALG00000002335
883.75671701621	334.49322603142	1283.66761549356	547.085029755386	619.822914431708	427.919729787505	EP400	ENSGALG00000002336
2226.8167227547	1700.34056565972	1961.26342425849	2216.29336871707	2149.97796038071	1931.86133045008	AP3S1	ENSGALG00000002341
890.905406334845	846.556930079519	1094.50545221335	992.340364191339	702.675723636623	874.985756209798	ATG12	ENSGALG00000002345
237.693919844603	91.8823985086307	266.332797056215	392.343826083698	218.144105248384	105.304631491332	CLSPN	ENSGALG00000002346
114.379029098155	92.9147850087277	24.4687375387336	35.9398924656823	32.5118618399034	12.445092812612	C9H3orf58	ENSGALG00000002347
1.78717232965867	32.0039815030062	92.2283184152265	19.9666069253791	8.39015789416863	27.7621301204422	DNAH3	ENSGALG00000002350
0.893586164829333	5.16193250048487	1.88221057990258	7.98664277015162	8.39015789416863	4.78657415869692	NA	ENSGALG00000002353
271.650194108117	248.805146523371	241.864059517482	247.5859258747	162.559309199517	195.292225674834	PUS1	ENSGALG00000002354
45.572894406296	17.5505705016486	20.7043163789284	22.9615979641859	11.5364671044819	89.9875941835022	CMTR2	ENSGALG00000002356
7158.51876644779	6385.31050309979	3876.41268930937	5070.51982870001	5192.45896675361	5776.43769471545	CDO1	ENSGALG00000002358
2601.22932581819	4803.69438495122	2725.44091969894	3017.95263677104	3291.03943398765	2712.07291831768	MANF	ENSGALG00000002362
11051.8736866092	10359.9985284731	7704.82900883122	9808.59565209246	8604.10692046993	9426.67914813772	HSPA9	ENSGALG00000002363
117.953373757472	171.376159016098	63.0540544267365	116.804650513467	213.9490263013	154.127687910041	SEC16A	ENSGALG00000002364
24.126826450392	25.8096625024244	43.2908433377594	19.9666069253791	48.2434078914696	44.9937970917511	NA	ENSGALG00000002367
23.2332402855627	5.16193250048487	1.88221057990258	0	0	0.957314831739385	RUSC2	ENSGALG00000002371
128.676407735424	96.0119445090186	158.105688711817	38.9348835044892	98.5843552564814	85.2010200248052	NA	ENSGALG00000002372
51.8279975601013	124.918766511734	51.760790947321	67.8864635462888	58.7311052591804	57.4388899043631	SLC9A9	ENSGALG00000002374
632.659004699168	474.897790044608	1135.91408497121	464.223611015063	566.335657856383	627.041214789297	NOTCH1	ENSGALG00000002375
14247.3378120389	22477.1188801113	19144.9049134791	13167.9772672875	19597.3113013044	26098.3169428791	ENO1	ENSGALG00000002377
1433.31220838625	1651.81840015516	2190.89311500661	1327.77936053771	2297.85449326543	1584.35604652868	MRPS17	ENSGALG00000002379
0	26.8420490025213	0	0	12.5852368412529	14.3597224760908	TMEM8B	ENSGALG00000002386
4107.81559972044	4667.41936693842	6197.17833432925	3972.35644780416	4250.66374313318	5596.46250634844	NIPSNAP2	ENSGALG00000002388
0	0	0	0	31.4630921031324	7.65851865391508	CA6	ENSGALG00000002390
2480.59519356623	1140.78708260716	1712.81162771135	2058.55717400658	1142.1102433437	1426.39909929168	RGP1	ENSGALG00000002394
0	10.3238650009697	0	0	6.29261842062647	0	RAP1GDS1L	ENSGALG00000002395
46.4664805711253	70.2022820065943	51.760790947321	20.964937271648	9.43892763093971	51.6950009139268	PSPH	ENSGALG00000002397
946.307748554263	846.556930079519	627.717228397511	571.044958065841	740.431434160382	856.796774406749	GTF2H2	ENSGALG00000002399
56.295928384248	105.303423009891	7.52884231961033	1.99666069253791	18.8778552618794	60.3108343995812	ULK1	ENSGALG00000002403
1409.18538193586	2316.67530621761	1695.87173249223	2071.53546850808	1325.64494727864	1839.00179177136	NCDN	ENSGALG00000002408
338.669156470317	122.85399351154	604.189596148729	377.368870889664	293.655526295902	150.298428583083	GBA2	ENSGALG00000002412
0	0	0	14.9749551940343	0	0	NA	ENSGALG00000002413
249.310539987384	128.015926012025	138.34247762284	413.308763355346	610.383986800768	232.627504112671	TSPAN14	ENSGALG00000002414
972.221747334314	769.127942572246	1262.02219382468	1337.7626640004	991.08740124867	1050.17437041811	SAP30BP	ENSGALG00000002415
763.12258476425	643.176789560415	749.119810801228	752.74108108679	466.70253286313	712.242234814102	GMPPA	ENSGALG00000002417
41.9985497469786	37.1659140034911	34.8208957281978	163.726176788108	47.1946381546986	52.6523157456662	KIAA1328	ENSGALG00000002419
727.379138171077	661.759746562161	488.43364548472	786.684312859935	866.283802572911	718.943438636278	FAM213A	ENSGALG00000002421
291.309089734362	265.323330524922	85.6405813855675	31.9465710806065	209.753947354216	16.2743521395695	RECQL5	ENSGALG00000002424
57.1895145490773	83.6233065078549	68.7006861664443	47.9198566209097	49.2921776282407	71.7986123804539	EXOSC3	ENSGALG00000002426
191.227439273477	219.898324520656	117.638161243911	98.8347042806263	197.168710512963	286.237134690076	SMIM5	ENSGALG00000002427
0	0	0	0	0	45.9511119234905	ZP2	ENSGALG00000002428
1710.32391948334	1371.00927212878	1764.57241865867	1941.75252349311	1867.85890118929	2086.94633319186	SMN	ENSGALG00000002430
43.7857220766373	0	72.4651073262494	78.8680973552473	72.3651118372045	112.963150145247	CFH	ENSGALG00000002431
102.762408955373	8.25909200077579	273.861639375826	80.8647580477852	205.558868407131	112.963150145247	FAM69B	ENSGALG00000002437
11.6166201427813	3.09715950029092	3.76442115980516	10.9816338089585	27.2680131560481	5.74388899043631	BDP1	ENSGALG00000002439
0	0	0	0	0	45.9511119234905	ANKS4B	ENSGALG00000002442
16.084550966928	0	0	0	0	0	FBXL16	ENSGALG00000002443
77.741996340152	273.582422525698	26.3509481186362	55.9064993910614	144.730223674409	34.4633339426179	KIAA0319L	ENSGALG00000002445
5212.2880994495	3334.60839531323	4044.87053621065	5641.56478676585	5040.38735492181	4078.16118320978	CTNNA1	ENSGALG00000002447
10115.395385868	11657.708359095	12241.8976116864	9991.29010545968	9402.22069015272	12652.8301310995	CCT6A	ENSGALG00000002448
1403.82386494688	1901.65593317863	1847.38968417438	1619.29182164824	921.868598621778	1123.88761246204	WDR24	ENSGALG00000002450
1813.97991460355	2027.60708619046	410.321906418763	238.60095275828	0	30.6340746156603	AQP3	ENSGALG00000002452
0	11.3562515010667	12.2343687693668	0	0	0	NA	ENSGALG00000002453
223.396541207333	388.177324036462	333.151272642757	506.153485558359	330.36246708289	465.255008225341	SIL1	ENSGALG00000002457
2391.23657708329	1858.29570017455	2480.7535443116	2183.3484672902	2281.0741774771	2297.55559617452	VAC14	ENSGALG00000002458
133.144338559571	102.2062635096	245.628480677287	414.307093701615	325.118618399035	244.115282093543	NA	ENSGALG00000002461
518.279975601013	501.73983904713	431.967328087643	632.941439534516	486.629157861781	567.687695221455	SUMF2	ENSGALG00000002463
14.2973786372693	0	0	0	15.7315460515662	6.70120382217569	SLC2A5	ENSGALG00000002466
87.5714441532746	194.088662018231	222.100848428505	94.8413828955505	288.411677612047	106.261946323072	MTSS1L	ENSGALG00000002467
1132.17367083876	630.788151559251	781.117390659572	1134.10327336153	1272.15769070332	789.784736184993	CDC73	ENSGALG00000002469
16.9781371317573	27.8744355026183	9.41105289951291	2.99499103880686	6.29261842062647	21.0609262982665	CYP27A1	ENSGALG00000002470
61.657445373224	0	0	98.8347042806263	166.754388146602	79.4571310343689	NA	ENSGALG00000002473
0	0	0	25.9565890029928	0	0	NA	ENSGALG00000002477
5778.8217279513	6372.92186509862	6479.50992131464	7876.82643206204	9223.92983490164	8735.49783962189	MATR3	ENSGALG00000002478
241.26826450392	171.376159016098	80.935054935811	38.9348835044892	164.656848673059	79.4571310343689	MAT1A	ENSGALG00000002479
1013.32671091646	1209.95697811365	1438.00888304557	1086.18341674062	2263.24509195199	2719.73143697159	CRYM	ENSGALG00000002484
2320.64327006178	2894.81174627192	3798.30095024341	3052.89419889046	2280.02540774033	3129.46218495605	PHKG1	ENSGALG00000002485
1354.67662588127	974.572856091544	910.048815382899	1121.12497886003	547.457802594503	927.638071955464	RNF123	ENSGALG00000002486
658.573003479218	373.723913035105	1079.44776757413	1156.06654097945	920.819828885007	956.357516907646	SFSWAP	ENSGALG00000002487
1410.07896810069	2195.88608570626	2145.72006108894	1281.85616460934	2002.10142749599	1726.99595645785	PAIP2B	ENSGALG00000002488
122.421304581619	296.294925527832	226.806374878261	95.8397132418195	329.313697346119	216.353151973101	NA	ENSGALG00000002489
7113.83945820632	7313.42596668697	6375.98833942	7323.75142022904	7158.90222319938	7185.60512703582	UQCRC2	ENSGALG00000002490
66.1253761973706	91.8823985086307	0	63.893142161213	68.1700328901201	41.1645377647936	H6PD	ENSGALG00000002492
9619.45506438777	10488.0144544852	12184.4901889994	10967.6571841107	10447.8441177135	11049.327787936	CHCHD2P9	ENSGALG00000002495
0	4.1295460003879	0	0	0	0	SFTPA1	ENSGALG00000002496
1269.78594022248	1273.96494111967	569.368700420531	1309.80941430487	1301.52324333291	1435.01493277734	RHOT2	ENSGALG00000002497
293.989848228851	395.404029537141	322.799114453293	403.325459892657	474.043921020528	300.596857166167	ZMYM4	ENSGALG00000002499
2097.24672885444	3670.13400784474	3049.18113944218	3099.8157251651	3149.45551952355	3033.73070178211	GMPPB	ENSGALG00000002500
318.116674679242	326.234134030644	232.453006617969	135.772927092578	166.754388146602	303.468801661385	VKORC1L1	ENSGALG00000002501
45.572894406296	50.5869385047517	21.6454216688797	19.9666069253791	0	0	TROVE2	ENSGALG00000002504
284.160400415728	585.363145554984	47.0552644975646	113.809659474661	234.924421036722	59.3535195678419	SPSB1	ENSGALG00000002506
14.2973786372693	0	32.9386851482952	0	0	1.91462966347877	MBL2	ENSGALG00000002507
77.741996340152	82.5909200077579	53.6430015272236	75.8731063164404	7.34138815739755	57.4388899043631	IP6K1	ENSGALG00000002510
7.14868931863466	0	11.2932634794155	5.98998207761372	0	4.78657415869692	TSHB	ENSGALG00000002511
880.182372356893	663.824519562355	1747.63252343955	1282.8544949556	2211.85537485021	1385.23456152689	SFPQ	ENSGALG00000002514
766.696929423568	602.913716056633	676.654703474978	1448.57733243625	1124.2811578186	1194.72891001075	OLFM1	ENSGALG00000002515
94.7201334719093	130.080699012219	61.1718438468339	86.8547401253989	124.803598675758	86.1583348565446	TMEM35B	ENSGALG00000002517
453.048185568472	532.711434050039	288.919324015046	481.195226901635	526.482407859082	442.279452263596	SLC25A33	ENSGALG00000002519
92.0393749774213	128.015926012025	171.281162771135	251.579247259776	130.047447359614	57.4388899043631	CREB3L4	ENSGALG00000002523
1591.47695956104	2257.82927571208	1449.30214652499	1281.85616460934	1524.91119726515	1625.52058429348	UCHL5	ENSGALG00000002524
54.5087560545893	4.1295460003879	61.1718438468339	4.99165173134476	101.730664466795	11.4877779808726	RASGEF1A	ENSGALG00000002525
175.142888306549	187.894343017649	102.580476604691	52.9115083522545	153.120381568578	122.536298462641	TMEM201	ENSGALG00000002527
248.416953822555	690.666568564876	211.748690239041	502.160164173283	325.118618399035	343.676024594439	DNAJC18	ENSGALG00000002528
4781.57956800176	4413.45228791457	3372.92135918543	4674.18268123124	3680.13300632972	2819.29217947249	SF3B3	ENSGALG00000002531
153.696820350645	0	137.401372332889	70.8814545850956	71.3163421004334	186.67639218918	GJA4	ENSGALG00000002532
394.965084854565	406.760281038208	246.569585967238	308.484076997106	220.241644721927	273.792041877464	STX2	ENSGALG00000002536
24.126826450392	49.5545520046548	12.2343687693668	87.8530704716678	0	44.0364822600117	KCNN2	ENSGALG00000002539
793.504514368448	774.289875072731	461.141592076133	573.041618758379	680.65155916443	669.16306738583	GUSB	ENSGALG00000002542
293.989848228851	326.234134030644	110.109318924301	294.507452149341	35.6581710502167	131.152131948296	CSGALNACT2	ENSGALG00000002543
83.9970994939573	105.303423009891	72.4651073262494	287.519139725458	36.7069407869878	110.091205650029	PCDH12	ENSGALG00000002544
7006.6091184268	6139.60251607671	8698.63619501978	6781.658042205	8421.62098627176	8075.90792055345	COL5A1	ENSGALG00000002546
2771.90428330059	2338.35542271965	3121.64624676843	3670.86068323094	2876.77538796307	2365.52494922802	TLN1	ENSGALG00000002548
7.14868931863466	0	0	0	0	18.1889818030483	CFAP70	ENSGALG00000002551
0	0	1.88221057990258	128.784614668695	0	0	PCDH1	ENSGALG00000002553
940.946231565287	793.905218574573	377.383221270468	185.689444406025	79.706499994602	146.469169256126	TSPAN2	ENSGALG00000002554
5.361516988976	13.4210245012607	0	0	2.09753947354216	0	RET	ENSGALG00000002555
95.6137196367386	68.1375090064003	152.459056972109	169.716158865722	0	97.6461128374172	NGF	ENSGALG00000002556
38.4242050876613	8.25909200077579	19.7632110889771	75.8731063164404	1.04876973677108	80.4144458661083	ADGRD1	ENSGALG00000002557
632.659004699168	1798.41728316893	188.221057990258	181.696123020949	25.1704736825059	221.139726131798	ASL1	ENSGALG00000002558
160.84550966928	229.189803021528	207.043163789284	220.631006525439	209.753947354216	227.840929953974	FANCE	ENSGALG00000002561
183.185163790013	200.282981018813	5.64663173970775	106.821347050778	0	2.87194449521815	ARAP3	ENSGALG00000002562
94.7201334719093	116.659674510958	140.224688202742	148.751221594074	46.1458684179275	111.048520481769	TPM4	ENSGALG00000002563
323.478191668218	316.942655529771	191.044373860112	10.9816338089585	37.7557105237588	249.859171083979	RGS4	ENSGALG00000002564
16956.6910638014	16643.1027680633	18888.9242746124	21337.3144908063	18979.5859263462	18609.2430141819	RAN	ENSGALG00000002569
0.893586164829333	2.06477300019395	0	1.99666069253791	0	1.91462966347877	LOC416197	ENSGALG00000002570
873.033683038258	1921.27127668047	704.887862173517	694.837921003191	209.753947354216	684.48010469366	ASL	ENSGALG00000002576
32.169101933856	76.3966010071761	0	18.9682765791101	0	0	STARD10	ENSGALG00000002577
22.3396541207333	33.0363680031032	60.2307385568826	25.9565890029928	0	11.4877779808726	APH1B	ENSGALG00000002578
84.8906856587866	165.181840015516	225.86526958831	47.9198566209097	305.191993400384	135.938706106993	RIMBP2	ENSGALG00000002579
453.941771733301	550.262004551687	764.177495440448	571.044958065841	425.800513129058	504.504916326656	HTATIP2	ENSGALG00000002581
74.1676516808346	51.6193250048487	121.402582403717	1.99666069253791	72.3651118372045	45.9511119234905	PIK3CD	ENSGALG00000002583
1275.14745721146	1862.42524617494	1683.63736372286	1790.00631086023	1964.34571697223	2746.53625226029	CRCP	ENSGALG00000002587
1120.55705069598	1280.15926012025	1369.30819687913	1136.09993405407	1167.28071702621	1477.13678537387	PPARD	ENSGALG00000002588
84.8906856587866	133.17785851251	69.6417914563956	166.721167826915	60.8286447327226	134.024076443514	TFPI	ENSGALG00000002594
2797.81828208064	3126.06632229364	3098.11861451965	4053.22120585195	3380.18486161319	3268.27283555826	GPX4	ENSGALG00000002595
8.93586164829333	45.4250060042669	0	0	32.5118618399034	27.7621301204422	MSS51	ENSGALG00000002597
1233.14890746448	678.277930563712	986.278343868953	1259.89289699142	1103.30576308318	717.028808972799	TPST1	ENSGALG00000002598
843.54533959889	198.218208018619	414.086327578568	1155.06821063318	406.922657867179	520.779268466225	ARHGEF39	ENSGALG00000002599
2626.24973843341	2478.75998673284	2133.48569231958	2854.22645998294	2041.95467749329	2370.31152338672	COG4	ENSGALG00000002603
2166.0528635463	1378.23597762946	1364.60267042937	3345.40499034726	1349.76665122438	983.162332196348	MRPL17	ENSGALG00000002605
538.832457392088	674.148384563324	782.058495949523	518.133449713586	723.651118372044	609.809547817988	CLSTN1	ENSGALG00000002606
22.3396541207333	7.22670550067882	0.941105289951291	63.893142161213	7.34138815739755	12.445092812612	NA	ENSGALG00000002610
2460.93629793998	2363.13269872197	3921.58574322703	3392.3265166219	2535.92522351247	3231.89487195216	U2SURP	ENSGALG00000002612
1912.27439273477	1920.23889018037	946.751921690999	1274.86785218545	872.576420993538	1553.72197191302	DEF6	ENSGALG00000002615
500.408252304426	577.104053554209	711.475599203176	805.652589439045	628.213072325876	647.144826255824	LZIC	ENSGALG00000002616
297.564192888168	320.039815030062	304.918113944218	203.659390638866	287.362907875276	343.676024594439	KCTD7	ENSGALG00000002618
34.849860428344	34.0687545032002	3.76442115980516	29.9499103880686	33.5606315766745	0	SLC25A42	ENSGALG00000002621
411.049635821493	429.472784040341	309.623640393975	336.437326692637	509.702092070744	463.340378561862	FCHSD1	ENSGALG00000002622
27.7011711097093	33.0363680031032	52.7018962372723	24.9582586567238	216.046565774842	172.316669713089	PCOLCE2	ENSGALG00000002623
1666.53819740671	1656.98033265564	1530.2372014608	2052.56719192897	1951.76048013098	1835.1725324444	BMS1	ENSGALG00000002624
620.148798391557	198.218208018619	248.451796547141	460.230289629987	514.9459407546	605.022973659291	ZNF76	ENSGALG00000002630
14.2973786372693	61.9431900058185	96.933844864983	2.99499103880686	47.1946381546986	14.3597224760908	LRRC75A	ENSGALG00000002631
59.8702730435653	18.5829570017455	43.2908433377594	42.928204889565	5.2438486838554	6.70120382217569	CALCRL	ENSGALG00000002632
4552.82150980545	4234.84942339779	4723.40745026553	3671.85901357721	3466.18398002842	4566.39174739687	HDAC3	ENSGALG00000002634
0	0	0.941105289951291	0	0	0.957314831739385	RBP7	ENSGALG00000002637
0	3.09715950029092	0	0	0	21.0609262982665	SRRL	ENSGALG00000002638
147.44171719684	74.3318280069821	71.5240020362981	30.9482407343375	270.582592086938	91.9022238469809	TRPC1	ENSGALG00000002639
11.6166201427813	0	39.5264221779542	0	0	46.9084267552299	NA	ENSGALG00000002643
5141.69479242798	5914.54225905557	4737.5240296148	5995.97205969133	5941.28055880816	4008.2772004928	RPL10A	ENSGALG00000002644
1.78717232965867	0	0	0	0	8.61583348565446	PIWIL1	ENSGALG00000002645
208.205576405235	228.157416521431	66.8184755865417	188.684435444832	170.949467093686	190.505651516138	FAM171B	ENSGALG00000002646
0	0	0	0	18.8778552618794	3.82925932695754	PLS1	ENSGALG00000002647
116.166201427813	155.890361514643	114.814845374058	246.587595528431	140.535144727325	98.6034276691566	NA	ENSGALG00000002648
247.523367657725	166.214226515613	389.617590039835	300.497434226955	246.460888141204	158.914262068738	UBE4B	ENSGALG00000002649
110.804684438837	56.7812575053336	94.1105289951291	100.831364973164	113.267131571277	100.518057332635	ST3GAL2	ENSGALG00000002651
738.102172149029	611.172808057409	941.105289951291	799.662607361431	783.430993367996	851.052885416313	NCBP3	ENSGALG00000002653
442.32515159052	470.76824404422	158.105688711817	442.260343397146	331.411236819661	302.511486829646	ITGAV	ENSGALG00000002655
1628.11399231904	1395.78654813111	1352.36830166001	1520.45711736761	2228.63569063854	1239.7227071025	WDR5B	ENSGALG00000002659
14458.2241469386	14362.5609893491	17017.0658528992	15502.0736168643	16711.0969857104	19873.8559069096	YWHAE	ENSGALG00000002661
143.867372537523	81.558533507661	205.160953209381	60.8981511224061	305.191993400384	449.937970917511	ATR	ENSGALG00000002663
0.893586164829333	16.5181840015516	0.941105289951291	0	8.39015789416863	78.4998162026296	RAB11FIP3	ENSGALG00000002666
60.7638592083946	163.117067015322	43.2908433377594	37.9365531582202	1.04876973677108	15.3170373078302	OLFML2B	ENSGALG00000002667
13.40379247244	0	0	0	20.9753947354216	10.5304631491332	TMEM132D	ENSGALG00000002671
47.3600667359546	60.9108035057215	54.5841068171749	48.9181869671787	139.486374990554	122.536298462641	NA	ENSGALG00000002673
26.80758494488	126.983539511928	9.41105289951291	0	0	21.0609262982665	SCUBE3	ENSGALG00000002675
611.212936743264	448.055741042087	15.998789929172	292.510791456803	457.26360523219	437.492878104899	CSPG4	ENSGALG00000002678
361.90239675588	373.723913035105	352.914483731734	321.462371498603	420.556664445203	403.98685899402	GLT1D1	ENSGALG00000002679
719.336862687613	1337.97290412568	1454.00767297474	741.759447277832	1024.64803282534	1589.14262068738	BRD3	ENSGALG00000002682
4662.73260807946	3892.09710536559	4940.80277224428	4948.7235264552	4662.83024968422	4751.15350992257	DECR2	ENSGALG00000002683
491.472390656133	459.411992543154	200.455426759625	628.94811814944	539.067644700335	743.833624261502	ECD	ENSGALG00000002686
292.202675899192	265.323330524922	433.849538667545	344.423969462789	163.608078936288	376.224728873578	LOC107056600	ENSGALG00000002689
159.951923504451	232.286962521819	189.16216328021	79.8664277015162	29.3655526295902	7.65851865391508	PDPR	ENSGALG00000002690
0.893586164829333	0	26.3509481186362	44.9248655821029	0	0.957314831739385	TCP11	ENSGALG00000002692
225.183713536992	207.509686519492	123.284792983619	224.624327910514	175.14454604077	150.298428583083	FAM149B1	ENSGALG00000002693
767.590515588397	838.297838078743	677.59580876493	554.073342179269	659.676164429009	598.321769837116	SLC15A4	ENSGALG00000002695
255.565643141189	285.971060526862	107.286003054447	368.383897773244	319.874769715179	409.730747984457	VAV2	ENSGALG00000002699
2720.07628574049	2759.56911475921	3801.12426611327	3689.82895981005	2337.70774326274	3191.68764901911	DNAJC9	ENSGALG00000002701
990.093470630901	1276.02971411986	1207.43808700751	1508.47715321239	1434.71699990284	1323.96641229557	TFAM	ENSGALG00000002703
1935.50763302033	1217.18368361433	1892.56273809205	1921.78591656773	1687.47050646467	1724.12401196263	CISD1	ENSGALG00000002705
29.488343439368	37.1659140034911	13.1754740593181	42.928204889565	146.827763147951	72.7559272121932	XRN1	ENSGALG00000002706
3.57434465931733	0	0	2.99499103880686	0	0	CHRNB2	ENSGALG00000002707
13.40379247244	143.501723513479	13.1754740593181	138.767918131384	230.729342089637	212.523892646143	LINGO1	ENSGALG00000002708
377.986947722808	368.56198053462	67.759580876493	51.9131780059855	139.486374990554	100.518057332635	MYO1C	ENSGALG00000002709
25.0204126152213	10.3238650009697	116.69705595396	45.9231959283718	0	58.3962047361025	IPMK	ENSGALG00000002710
218.928610383187	5.16193250048487	210.807584949089	197.669408561253	2.09753947354216	44.0364822600117	TMEM132C	ENSGALG00000002714
1131.28008467394	694.796114565264	986.278343868953	1035.2685690809	975.355855197103	767.766495054987	CSNK1D	ENSGALG00000002719
38.4242050876613	19.6153435018425	0	4.99165173134476	40.9020197340721	21.0609262982665	ANKS1A	ENSGALG00000002723
67.9125485270293	42.3278465039759	69.6417914563956	65.8898028537509	314.630921031324	75.6278717074114	UAP1	ENSGALG00000002725
2318.85609773212	3040.37824278559	2449.69706974321	1629.27512511093	2544.31538140664	3111.273203153	KIF1B	ENSGALG00000002726
1127.70574001462	1572.32463964769	559.016542231067	495.171851749401	737.285124950069	1098.99742683681	SLC16A3	ENSGALG00000002728
201.950473251429	257.064238524147	203.278742629479	80.8647580477852	54.5360263120961	201.99342949701	GK5	ENSGALG00000002729
142.080200207864	314.877882529577	327.504640903049	219.63267617917	250.655967088288	138.810650602211	UHMK1	ENSGALG00000002734
103.655995120203	149.696042514061	71.5240020362981	136.771257438847	11.5364671044819	50.7376860821874	TAF11	ENSGALG00000002735
210.886334899723	72.2670550067882	236.217427777774	120.797971898543	208.705177617445	145.511854424386	INPP5K	ENSGALG00000002739
75.061237845664	12.3886380011637	96.933844864983	36.9382228119512	285.265368401733	42.1218525965329	TMEM132B	ENSGALG00000002742
25.9139987800507	21.6801165020365	50.8196856573697	0	100.681894730024	15.3170373078302	PCDH15	ENSGALG00000002744
218.928610383187	638.01485705993	362.325536631247	185.689444406025	610.383986800768	333.145561445306	NCKAP1	ENSGALG00000002750
159.058337339621	98.0767175092126	104.462687184593	249.582586567238	174.095776303999	123.493613294381	NA	ENSGALG00000002755
23.2332402855627	38.1983005035881	62.1129491367852	6.98831242388267	61.8774144694937	55.5242602408843	NA	ENSGALG00000002756
91.1457888125919	193.056275518134	101.639371314739	311.479068035913	180.388394724626	154.127687910041	PEAK1	ENSGALG00000002759
173.355715976891	237.448895022304	193.867689729966	190.68109613737	323.021078925492	257.517689737895	SIRT1	ENSGALG00000002761
19.6588956262453	0	29.17426398849	0.998330346268953	0	3.82925932695754	UHRF1BP1	ENSGALG00000002762
1402.93027878205	4456.81252091864	473.375960845499	1760.05640047216	2352.39051957753	1552.76465708128	FRZB	ENSGALG00000002763
2993.51365217827	3390.35726631846	2172.07100920758	2142.41692309317	2256.95247353136	2403.8175424976	ATP1B3	ENSGALG00000002764
332.414053316512	292.165379527444	17.8810005090745	280.530827301576	161.510539462746	205.822688823968	NBR1	ENSGALG00000002765
0	0	0	57.9031600835993	0	0	MLKL	ENSGALG00000002766
182.291577625184	174.473318516389	159.98789929172	247.5859258747	735.187585476526	626.083899957558	DNAJC12	ENSGALG00000002769
101.868822790544	18.5829570017455	72.4651073262494	178.701131982143	113.267131571277	55.5242602408843	CRIP1	ENSGALG00000002771
1998.95225072322	2329.06394421877	1997.96653056659	2226.27667217976	2151.02673011748	1814.11160614613	SNRPC	ENSGALG00000002773
6802.87147284571	6550.4923431153	4061.81043142977	4765.03074274171	6634.51735481385	8008.89588233169	TSPAN3	ENSGALG00000002774
2.680758494488	51.6193250048487	15.998789929172	0	0	0	FA2H	ENSGALG00000002775
554.023422194186	310.748336529189	709.593388623274	584.023252567337	569.481967066696	538.010935437534	BRCA1	ENSGALG00000002781
67.0189623622	98.0767175092126	9.41105289951291	1.99666069253791	114.315901308048	72.7559272121932	SLC43A2	ENSGALG00000002783
1889.93473861404	2534.50885773807	1998.90763585654	1348.74429780935	1922.39492750139	1623.60595463	APEH	ENSGALG00000002784
7.14868931863466	3.09715950029092	8.46994760956162	0	0	0	PSTPIP1	ENSGALG00000002786
1023.15615872959	1048.90468409853	779.235180079669	677.866305116619	1085.47667755807	869.241867219361	MAP2	ENSGALG00000002789
31.2755157690266	0	3.76442115980516	13.9766248477653	13.634006578024	42.1218525965329	ABLIM3	ENSGALG00000002790
6015.62206163107	6465.83665010735	6439.98349913669	4758.04243031783	4555.85573653357	6558.56391224653	PGD	ENSGALG00000002797
600.489902765312	727.832482568367	482.787013745012	494.173521403132	717.358499951418	589.705936351461	WDR59	ENSGALG00000002798
12.5102063076107	7.22670550067882	9.41105289951291	20.964937271648	10.4876973677108	10.5304631491332	GRK7	ENSGALG00000002800
30.3819296041973	81.558533507661	5.64663173970775	40.9315441970271	268.485052613396	106.261946323072	PACSIN1	ENSGALG00000002802
1347.52793656263	819.714881076998	1334.48730115093	1174.03648721229	1143.15901308048	617.468066471903	MTA1	ENSGALG00000002803
287.734745075045	334.49322603142	304.918113944218	134.774596746309	92.2917368358549	112.005835313508	RND2	ENSGALG00000002804
4318.70193462017	4645.73925043638	5364.30015272236	5228.2560234105	5597.28408514725	3736.39978827882	RPS10	ENSGALG00000002813
200.163300921771	259.129011524341	74.347317906152	452.243646859836	1064.50128282265	539.925565101013	STK10	ENSGALG00000002816
296.670606723338	243.643214022886	136.460267042937	352.41061223294	292.606756559131	168.487410386132	VAT1	ENSGALG00000002818
627.297487710192	307.651177028898	841.348129216454	746.751099009177	391.191111815612	466.21232305708	DFFA	ENSGALG00000002820
2765.64918014679	2867.96969726939	2221.00848428505	2175.36182452005	2656.53374324114	2847.05430959293	GPS1	ENSGALG00000002827
9.82944781312266	2.06477300019395	30.1153692784413	16.9716158865722	16.7803157883373	8.61583348565446	NUDT3	ENSGALG00000002830
83.1035133291279	117.692061011055	95.0516342850804	50.9148476597166	39.853249997301	71.7986123804539	SH3PXD2B	ENSGALG00000002831
505.769769293402	524.452342049263	448.907223306766	557.068333218076	266.387513139854	486.315934523607	IFI35	ENSGALG00000002832
1226.00021814584	1294.61267112161	1606.46672994685	901.492302680864	2132.1488748556	1408.21011748864	PEX14	ENSGALG00000002836
5761.84359081954	7706.76522322391	7682.24248187239	7813.93162024709	7841.65132183736	6689.71604419482	RPL27	ENSGALG00000002837
242.161850668749	313.84549602948	144.930214652499	130.781275361233	512.848401281058	242.200652430064	GRM4	ENSGALG00000002840
136.718683218888	257.064238524147	123.284792983619	193.676087176177	261.143664455999	33.5060191108785	RFNG	ENSGALG00000002841
150.122475691328	201.31536751891	327.504640903049	173.709480250798	216.046565774842	140.72528026569	RILP	ENSGALG00000002843
25.0204126152213	3.09715950029092	0	1.99666069253791	124.803598675758	111.048520481769	CTNNA3	ENSGALG00000002845
16.9781371317573	0	0	38.9348835044892	1.04876973677108	24.890185625224	NEURL1B	ENSGALG00000002846
2173.20155286494	2853.51628626804	1973.49779302786	2706.47356873513	3375.9897826661	3222.32172363477	NA	ENSGALG00000002847
898.05409565348	1099.49162260328	1202.73256055775	814.637562555465	1074.98898019036	1022.41224029766	DCXR	ENSGALG00000002849
101.868822790544	36.1335275033941	76.2295284860546	82.8614187403231	81.8040394681442	199.121485001792	RASA2	ENSGALG00000002850
635.339763193656	1050.96945709872	848.876971536065	933.438873761471	886.210427571562	1055.91825940854	CFDP1	ENSGALG00000002853
0	0	33.8797904382465	0	0	0	PDZD2	ENSGALG00000002854
1112.51477521252	358.23811553365	1358.95603868966	2360.0529385798	1613.00785515392	2577.09152704242	NA	ENSGALG00000002855
2232.17823974367	2194.85369920617	3271.28198787069	2458.88764286043	2082.85669722736	2777.17032687596	RUNDC1	ENSGALG00000002856
647.849969501266	734.026801568949	373.618800110663	612.974832609137	1088.62298676838	902.74788633024	TMEM170A	ENSGALG00000002861
3245.50495066014	2968.1111877788	1529.29609617085	3093.82574308748	1657.0561840983	2065.88540689359	ERGIC1	ENSGALG00000002863
5.361516988976	0	0	72.8781152776335	2.09753947354216	0	LRRTM3	ENSGALG00000002864
79.5291686698106	29.9392085028123	19.7632110889771	59.8998207761372	54.5360263120961	19.1462966347877	KANSL1L	ENSGALG00000002866
15604.6951964146	19275.6883433106	14228.5708787736	17404.8912568529	16725.7797620252	12585.8180928777	RPL26L1	ENSGALG00000002868
273.437366437776	266.355717025019	238.099638357677	435.272030973263	456.214835495419	416.431951806632	LEMD2	ENSGALG00000002870
125.102063076107	61.9431900058185	272.920534085874	317.469050113527	183.534703934939	216.353151973101	LRRC45	ENSGALG00000002877
167.100612823085	134.210245012607	165.634531031427	152.74454297915	0	225.926300290495	CREBRF	ENSGALG00000002878
1364.50607369439	1765.38091516583	1327.89956412127	1241.92295075858	1378.0834341172	1267.48483722295	AARSD1	ENSGALG00000002880
746.144447632493	985.929107592611	557.134331651164	929.445552376395	1079.18405913744	905.619830825458	C26H6ORF125	ENSGALG00000002881
579.937420974237	1025.1597945963	705.828967463468	631.943109188247	498.165624966263	724.687327626714	BNIP1	ENSGALG00000002882
342.243501129634	470.76824404422	626.77612310756	585.021582913606	446.77590786448	549.498713418407	SCAPER	ENSGALG00000002883
0.893586164829333	0	1.88221057990258	0	0	0	CASZ1	ENSGALG00000002888
2900.58069103601	4031.46928287869	3793.59542379365	2907.13796833519	2578.92478272008	4321.31915047158	ACADL	ENSGALG00000002891
159.951923504451	162.084680515225	216.454216688797	217.636015486632	45.0970986811564	131.152131948296	SLC22A15L	ENSGALG00000002892
69.699720856688	94.9795580089216	34.8208957281978	1.99666069253791	25.1704736825059	32.5487042791391	STC2	ENSGALG00000002893
228.758058196309	133.17785851251	114.814845374058	273.542514877693	197.168710512963	226.883615122234	SLC16A14	ENSGALG00000002897
576.36307631492	407.792667538305	239.981848937579	841.592481904727	468.800072336672	236.456763439628	AACS	ENSGALG00000002899
8.93586164829333	3.09715950029092	0.941105289951291	0	61.8774144694937	0	NOTUM	ENSGALG00000002900
114.379029098155	42.3278465039759	31.0564745683926	92.8447222030126	69.2188026268912	91.9022238469809	REEP3	ENSGALG00000002904
4183.77042373094	3395.51919881895	3886.76484749883	4536.41309344612	4951.24192729626	4822.95212230302	TARDBP	ENSGALG00000002906
1064.26112231174	352.043796533068	953.339658720658	249.582586567238	25.1704736825059	14.3597224760908	MYL1	ENSGALG00000002907
1477.09793046289	1082.97343860173	1381.5425656485	1847.90947094383	1183.01226307778	1294.28965251165	TRAIP	ENSGALG00000002908
15.1909648020987	304.554017528607	105.403792474545	0	0	15.3170373078302	MOXD1	ENSGALG00000002911
469.1327365354	452.185287042475	316.211377423634	560.063324256882	161.510539462746	280.49324569964	BRI3BP	ENSGALG00000002913
61.657445373224	224.027870521043	249.392901837092	269.549193492617	30.4143223663613	62.22546406306	MON1A	ENSGALG00000002919
3241.93060600082	2765.76343375979	3461.38525644085	3651.89240665183	2631.36326955864	3084.4683878643	LANCL1	ENSGALG00000002921
2251.83713536992	1857.26331367446	2392.28964705618	1362.72092265712	1358.15680911855	1154.5216870777	NOTCH2	ENSGALG00000002922
5904.81737719223	5568.69278152308	6548.21060748108	6202.626441369	7284.75459161192	8948.02173226803	ETFA	ENSGALG00000002925
314.542330019925	305.586404028704	571.250911000434	238.60095275828	431.044361812913	470.041582384038	TRIP12	ENSGALG00000002929
8308.56416058314	11047.5679375377	9129.66241781748	9441.21008466548	10686.9636176973	8055.80430908692	NME2	ENSGALG00000002932
9917.01925727594	11090.9281705418	9903.25096615744	8848.20185898173	8076.57574287408	9219.89914448201	PSME3	ENSGALG00000002937
466.451978040912	397.468802537335	571.250911000434	354.407272925478	498.165624966263	628.955844452776	JMJD1C	ENSGALG00000002942
2341.19575185285	2651.16853224903	3097.1775092297	2000.65401392298	2515.99859851382	2410.51874631977	PRPF8	ENSGALG00000002943
2.680758494488	0	0	25.9565890029928	1.04876973677108	4.78657415869692	CPS1	ENSGALG00000002944
177.823646801037	189.959116017843	293.624850464803	176.704471289605	132.144986833156	306.340746156603	TMEM266	ENSGALG00000002945
278.798883426752	57.8136440054306	255.0395335768	183.692783713487	70.2675723636623	273.792041877464	NRG4	ENSGALG00000002952
392.284326360077	663.824519562355	614.541754338193	290.514130764265	892.503045992188	418.346581470111	MBTD1	ENSGALG00000002954
797.972445192594	155.890361514643	362.325536631247	194.674417522446	22.0241644721927	22.0182411300059	ADAMTSL2	ENSGALG00000002955
0	0	0	0	0	2.87194449521815	SLC12A3	ENSGALG00000002957
25.9139987800507	0	0	43.9265352358339	11.5364671044819	34.4633339426179	DNER	ENSGALG00000002958
164.419854328597	306.618790528801	269.156112926069	152.74454297915	82.8528092049152	179.017873535265	NRBF2	ENSGALG00000002959
0	0	0	0	18.8778552618794	0	HMGCS2	ENSGALG00000002960
394.965084854565	1272.93255461957	427.261801637886	310.480737689644	657.578624955467	589.705936351461	PID1	ENSGALG00000002963
251.991298481872	185.829570017455	357.620010181491	377.368870889664	337.703855240287	395.371025508366	DHX37	ENSGALG00000002964
31.2755157690266	50.5869385047517	45.173053917662	9.98330346268953	1.04876973677108	30.6340746156603	ZNF365	ENSGALG00000002967
307.393640701291	146.59888301377	447.966118016815	272.544184531424	529.628717069395	206.780003655707	ZNF341	ENSGALG00000002968
132.250752394741	149.696042514061	227.747480168212	316.470719767258	124.803598675758	214.438522309622	MAU2	ENSGALG00000002969
224.290127372163	314.877882529577	60.2307385568826	114.80798982093	323.021078925492	303.468801661385	NSD1	ENSGALG00000002971
1429.73786372693	1612.58771315147	1524.59056972109	1289.84280737949	1939.17524328973	1455.11854424387	BECN1	ENSGALG00000002973
1.78717232965867	2.06477300019395	0	0	11.5364671044819	2.87194449521815	SPHKAP	ENSGALG00000002974
172.462129812061	134.210245012607	131.754740593181	294.507452149341	50.3409473650118	139.76796543395	RTKN2	ENSGALG00000002980
500.408252304426	457.34721954296	412.204116998666	1055.23517600628	553.75042101513	563.858435894498	ERCC4	ENSGALG00000002981
0	0	16.9398952191232	27.9532496955307	0	29.6767597839209	SLC2A6	ENSGALG00000002982
556.704180688674	755.706918070985	527.018962372723	414.307093701615	667.017552586406	540.882879932752	RAB24	ENSGALG00000002984
879.288786192064	1654.91555965545	790.528443559085	885.519017140561	976.404624933875	1332.58224578122	UTP18	ENSGALG00000002985
37.530618922832	6.19431900058185	50.8196856573697	0	0	18.1889818030483	SERPINF2	ENSGALG00000002987
1124.1313953553	945.666034088828	1418.2456719566	1173.03815686602	834.820710469779	1618.8193804713	PHGDH	ENSGALG00000002988
2695.05587312527	5478.87515601464	3911.23358503757	5053.54821281344	3818.5706115835	4951.2323097561	PRELID1	ENSGALG00000002990
348.49860428344	439.796649041311	207.984269079235	680.861296155426	374.410796027275	763.937235728029	CA10	ENSGALG00000002993
0	0	10.3521581894642	0	0	0	CCL20	ENSGALG00000003003
16.9781371317573	0	0	0	0	0	CHRNB4	ENSGALG00000003005
3829.91030245852	3890.0323323654	3978.05206062411	5077.50814112389	3779.76613132297	4384.50192936638	NUP93	ENSGALG00000003010
899.841267983138	1131.49560410628	675.713598185027	644.921403689743	577.872124960865	889.345478685889	TOM1L1	ENSGALG00000003011
14.2973786372693	0	43.2908433377594	22.9615979641859	46.1458684179275	16.2743521395695	C6H10orf107	ENSGALG00000003013
2858.58214128904	557.488710052366	3043.53450770248	2951.06450357102	2167.80704590582	2464.12837689718	SERPINF1	ENSGALG00000003015
13.40379247244	0	7.52884231961033	0.998330346268953	0	0	MASP2	ENSGALG00000003016
51.8279975601013	81.558533507661	95.0516342850804	121.796302244812	224.436723669011	84.2437051930659	CHRNA5	ENSGALG00000003021
155.483992680304	268.420490025213	0	0	0	177.103243871786	DM5L	ENSGALG00000003022
1185.78884072852	1449.47064613615	1188.61598120848	1261.88955768396	896.698124939273	941.040479599815	ARMC6	ENSGALG00000003024
4.46793082414666	0	0	1.99666069253791	17.8290855251083	0	NA	ENSGALG00000003025
213.567093394211	165.181840015516	88.4638972554214	146.754560901536	34.6094013134456	244.115282093543	NA	ENSGALG00000003026
33.9562742635146	21.6801165020365	45.173053917662	55.9064993910614	51.3897171017829	47.8657415869692	NA	ENSGALG00000003029
904.309198807285	596.719397056051	784.881811819377	512.143467635973	930.258756515947	900.833256666761	SMYD4	ENSGALG00000003031
51.8279975601013	122.85399351154	50.8196856573697	54.9081690447924	17.8290855251083	37.335278437836	STXBP4	ENSGALG00000003033
26.80758494488	18.5829570017455	2.82331586985387	20.964937271648	5.2438486838554	0	SS2	ENSGALG00000003034
20.5524817910747	64.0079630060124	45.173053917662	47.9198566209097	101.730664466795	26.8048152887028	SRM	ENSGALG00000003039
2309.026649919	2930.94527377531	2421.46391104467	2458.88764286043	1960.15063802515	2319.57383730453	PXMP4	ENSGALG00000003042
140.293027878205	125.951153011831	161.870109871622	232.610970680666	80.7552697313731	126.365557789599	E2F1	ENSGALG00000003045
5217.64961643847	5507.78197801736	6725.13840199193	5263.19758552992	6705.83369691428	6588.24067203045	PSMA4	ENSGALG00000003046
385.135637041442	410.889827038596	314.329166843731	381.36219227474	724.699888108816	319.743153800955	SUGP2	ENSGALG00000003047
201.0568870866	145.566496513673	97.8749501549343	188.684435444832	388.044802605299	182.847132862223	AGFG1	ENSGALG00000003052
16292.7565433332	18189.6177452086	22101.8577345061	17614.5406295694	18452.0547487504	22202.0455776998	PRDX6	ENSGALG00000003053
0	0	0	3.99332138507581	0	0	HOMER3	ENSGALG00000003058
629.97824620468	247.772760023274	878.992340814506	556.070002871807	311.48461182101	497.80371250448	HLF	ENSGALG00000003059
153.696820350645	140.404564013189	53.6430015272236	251.579247259776	321.972309188721	158.914262068738	HYKK	ENSGALG00000003063
274.330952602605	785.646126573797	360.443326051345	486.18687863298	257.997355245685	354.206487743572	NECAB3	ENSGALG00000003065
285.053986580557	357.205729033553	320.91690387339	368.383897773244	224.436723669011	142.639909929168	MRPL44	ENSGALG00000003067
232.332402855627	51.6193250048487	75.2884231961033	152.74454297915	247.509657877975	146.469169256126	EZH1	ENSGALG00000003068
130.463580065083	198.218208018619	221.159743138553	122.794632591081	179.339624987855	27.7621301204422	OGFOD1	ENSGALG00000003071
4094.411807248	2716.20888175514	4524.83423408581	4030.25960788776	2928.16510506485	5530.40778295843	RPA1	ENSGALG00000003072
17.8717232965867	1.03238650009697	0	11.9799641552274	16.7803157883373	34.4633339426179	RHOBTB1	ENSGALG00000003073
129.569993900253	261.193784524535	132.695845883132	206.654381677673	360.776789449251	323.572413127912	HOMER3	ENSGALG00000003074
18.765309461416	3.09715950029092	1.88221057990258	17.9699462328411	16.7803157883373	9.57314831739385	SLC34A1	ENSGALG00000003075
41.1049635821493	30.9715950029092	0	0	0	36.3779636060966	FASLG	ENSGALG00000003076
285.053986580557	251.902306023662	418.791854028325	435.272030973263	108.023282887421	319.743153800955	MMD	ENSGALG00000003078
228.758058196309	479.027336044996	197.632110889771	282.527487994114	470.897611810214	210.609262982665	MFF	ENSGALG00000003079
213.567093394211	182.732410517164	138.34247762284	174.707810597067	83.9015789416863	24.890185625224	SUCO	ENSGALG00000003081
172.462129812061	118.724447511152	159.98789929172	142.76123951646	173.047006567228	159.871576900477	DPH1	ENSGALG00000003082
7141.54062931603	7654.11351171897	8965.91009736595	7798.95666505306	6933.4167297936	7890.18884319601	NUDT21	ENSGALG00000003084
10376.3225459982	5380.79843850543	8468.06539898172	10125.0663718597	7710.55510474097	7843.28041644078	CDK1	ENSGALG00000003085
1457.43903483664	996.25297259358	1736.33925996013	1318.79438742129	1253.27983544144	1477.13678537387	EXOSC10	ENSGALG00000003086
805.121134511229	827.973973077774	539.25333114209	571.044958065841	843.210868363947	605.980288491031	PARN	ENSGALG00000003091
6094.25764413605	5465.45413151338	7162.75236181928	5586.65661772106	4763.51214441424	6452.30196592345	ERLIN2	ENSGALG00000003092
35.7434465931733	43.3602330040729	32.9386851482952	102.828025665702	90.1941973623128	52.6523157456662	CBFA2T2	ENSGALG00000003096
74.1676516808346	140.404564013189	141.165793492694	101.829695319433	176.193315777541	152.213058246562	PCTP	ENSGALG00000003099
2238.43334289748	2054.44913519298	2592.74507381581	2579.68561475897	2225.48938142823	3058.62088740733	PROSC	ENSGALG00000003101
0.893586164829333	0	42.3497380478081	28.9515800417996	0	0	MST1R	ENSGALG00000003103
6.25510315380533	0	0	28.9515800417996	0	0	ANKFN1	ENSGALG00000003105
236.800333679773	411.922213538693	219.277532558651	338.433987385175	563.189348646069	605.022973659291	TOX2	ENSGALG00000003106
465.558391876082	987.993880592804	164.693425741476	362.39391569563	311.48461182101	829.034644286307	AMFR	ENSGALG00000003107
2860.36931361869	3342.867487314	3962.99437598489	3077.85245754718	3000.53021690206	3525.79052529615	TSR1	ENSGALG00000003108
5.361516988976	0	0	0	0	2.87194449521815	NA	ENSGALG00000003110
176.036474471379	129.048312512122	38.5853168880029	165.722837480646	139.486374990554	112.963150145247	BFAR	ENSGALG00000003111
196.588956262453	215.768778520268	90.346107835324	310.480737689644	31.4630921031324	287.194449521815	RGS14	ENSGALG00000003113
1045.49581285032	990.058653592998	275.743849955728	799.662607361431	1463.03378279566	822.333440464132	NA	ENSGALG00000003114
66.1253761973706	48.5221655045578	79.0528443559085	98.8347042806263	96.4868157829393	95.7314831739385	ADGRA2	ENSGALG00000003118
990.98705679573	914.694439085919	782.999601239474	1778.026346705	1930.78508539556	1515.42937864345	NCOR2	ENSGALG00000003120
372.625430733832	395.404029537141	567.486489840629	464.223611015063	230.729342089637	443.236767095335	ZFAND2A	ENSGALG00000003122
868.565752214112	798.034764574961	1120.85640033199	1041.25855115852	921.868598621778	689.266678852357	CNTNAP1	ENSGALG00000003123
344.030673459293	219.898324520656	180.692215670648	383.358852967278	330.36246708289	221.139726131798	BRF2	ENSGALG00000003124
13.40379247244	0	116.69705595396	23.9599283104549	30.4143223663613	1.91462966347877	ERBB4	ENSGALG00000003126
917.712991279725	707.184752566428	814.997181097818	858.564097791299	1014.16033545763	742.876309429763	EDEM2	ENSGALG00000003128
8.042275483464	17.5505705016486	0	11.9799641552274	4.19507894708432	22.9755559617452	RAB11FIP1	ENSGALG00000003129
1453.86469017732	1514.51099564226	2206.89190493578	1633.26844649601	1854.22489461127	2727.38995562551	DDX49	ENSGALG00000003130
23.2332402855627	27.8744355026183	32.9386851482952	30.9482407343375	41.9507894708432	59.3535195678419	DGKE	ENSGALG00000003131
5.361516988976	0	0	40.9315441970271	0	0	NA	ENSGALG00000003134
179.610819130696	90.8500120085337	161.870109871622	284.524148686652	335.606315766745	211.566577814404	ANK3	ENSGALG00000003135
232.332402855627	66.0727360062064	81.8761602257623	0	84.9503486784574	205.822688823968	IKZF2	ENSGALG00000003136
26.80758494488	48.5221655045578	0.941105289951291	7.98664277015162	1.04876973677108	12.445092812612	RFLNA	ENSGALG00000003137
0	0	0	0	15.7315460515662	2.87194449521815	OXTR	ENSGALG00000003138
0	59.8784170056245	0	0	0	0	NA	ENSGALG00000003140
688.061346918586	558.521096552463	591.014122089411	442.260343397146	511.799631544287	430.791674282723	ZC3H7A	ENSGALG00000003143
235.013161350115	312.813109529383	264.450586476313	251.579247259776	542.213953910648	226.883615122234	TRIM25	ENSGALG00000003144
73.2740655160053	119.756834011249	41.4086327578568	76.8714366627094	22.0241644721927	119.664353967423	CCDC92	ENSGALG00000003146
1463.69413799045	1061.29332209969	1065.33118822486	1074.20345258539	1262.71876307238	666.291122890612	TRPC4AP	ENSGALG00000003147
85.784271823616	70.2022820065943	15.0576846392207	94.8413828955505	44.0483289443853	71.7986123804539	SPAG16	ENSGALG00000003148
66.1253761973706	0	10.3521581894642	103.826356011971	0	37.335278437836	ITPR3	ENSGALG00000003149
9759.74809226597	11106.4139680433	8974.38004497551	9567.99803864164	9846.89905854366	13339.2248654566	COPE	ENSGALG00000003153
966.860230345338	723.702936567979	222.100848428505	656.901367844971	648.139697324527	869.241867219361	TXNDC11	ENSGALG00000003154
142.080200207864	202.347754019007	457.377170916328	309.482407343375	143.681453937638	246.029911757022	SRR	ENSGALG00000003155
251.097712317043	291.132993027347	322.799114453293	253.575907952314	320.92353945195	269.005467718767	NA	ENSGALG00000003158
88.4650303181039	338.622772031808	4.70552644975646	155.739534017957	46.1458684179275	58.3962047361025	CERS1	ENSGALG00000003160
41.9985497469786	61.9431900058185	0	64.8914725074819	35.6581710502167	14.3597224760908	GDF3	ENSGALG00000003161
249.310539987384	240.546054522595	143.048004072596	141.762909170191	111.169592097734	164.658151059174	FAM134C	ENSGALG00000003162
331.520467151682	184.797183517358	317.152482713585	183.692783713487	327.216157872577	406.858803489239	GNAO1	ENSGALG00000003163
71.4868931863466	41.295460003879	33.8797904382465	61.8964814686751	89.1454276255417	64.1400937265388	NA	ENSGALG00000003164
125.995649240936	121.821607011443	228.688585458164	204.657720985135	155.21792104212	40.2072229330542	CCDC6	ENSGALG00000003165
29.488343439368	14.4534110013576	2.82331586985387	14.9749551940343	23.0729342089637	11.4877779808726	MTMR12	ENSGALG00000003168
1373.44193534268	1647.68885415477	2635.09481186362	1450.57399312879	1883.59044724086	2558.90254523938	CBFB	ENSGALG00000003169
49.1472390656133	20.6477300019395	50.8196856573697	20.964937271648	17.8290855251083	51.6950009139268	SLC16A9	ENSGALG00000003172
2.680758494488	30.9715950029092	0	7.98664277015162	7.34138815739755	13.4024076443514	RIMS3	ENSGALG00000003174
82.2099271642986	77.4289875072731	72.4651073262494	128.784614668695	209.753947354216	64.1400937265388	STKLD1	ENSGALG00000003175
0	0	18.8221057990258	6.98831242388267	0	0	ANGPTL7	ENSGALG00000003179
635.339763193656	746.415439570112	824.408233997331	616.968153994213	378.605874974359	627.041214789297	SURF2	ENSGALG00000003181
322.584605503389	170.343772516001	96.933844864983	51.9131780059855	570.530736803467	260.389634233113	C11H16orf70	ENSGALG00000003183
1584.32827024241	1133.56037710648	1248.84671976536	1503.48550148104	1595.17876962881	2567.51837872503	SCPEP1	ENSGALG00000003185
3070.36206235359	2865.9049242692	3410.56557078348	2582.68060579778	3542.7441708127	3094.04153618169	NFYC	ENSGALG00000003189
2319.74968389695	603.94610255673	4637.76686887996	1869.87273856175	431.044361812913	315.913894473997	CRABP1	ENSGALG00000003193
352.072948942757	388.177324036462	310.564745683926	248.584256220969	670.16386179672	192.420281179616	ATP6V0A2	ENSGALG00000003194
14.2973786372693	84.6556930079519	11.2932634794155	3.99332138507581	0	28.7194449521815	TRADD	ENSGALG00000003195
16.084550966928	0	31.9975798583439	0	0	0	RNASE6	ENSGALG00000003196
21004.6363904783	25722.9420364162	19028.2078575252	22608.1890216067	27066.649366588	17627.995311649	RPL7A	ENSGALG00000003197
2459.14912561032	2982.56459878016	2438.4038062638	2451.89933043655	2587.31494061425	2743.66430776508	MLX	ENSGALG00000003199
385.135637041442	448.055741042087	208.925374369187	539.098386985234	324.069848662263	484.401304860129	FBXL8	ENSGALG00000003201
1.78717232965867	4.1295460003879	0	1.99666069253791	6.29261842062647	2.87194449521815	NA	ENSGALG00000003203
506.663355458232	631.820538059348	1065.33118822486	330.447344615023	962.770618355851	975.503813542433	MED22	ENSGALG00000003204
4517.07806321228	6147.86160807748	7466.72937047354	5775.34105316589	5722.08768382301	7256.44642458454	EIF4EBP1	ENSGALG00000003205
608.532178248776	514.128477048293	571.250911000434	822.624205325617	1089.67175650515	616.510751640164	NA	ENSGALG00000003206
1310.89090380463	1520.70531464284	1301.54861600264	775.702679050976	1079.18405913744	1676.25827037566	GABARAPL2	ENSGALG00000003208
1199.19263320096	1787.06103166786	1405.07019789728	1586.34692022137	1257.47491438852	1100.91205650029	POLDIP2	ENSGALG00000003211
517.386389436184	687.569409064585	465.847118525889	574.039949104648	75.5114210475177	419.303896301851	TSPO2	ENSGALG00000003212
10.723033977952	17.5505705016486	16.9398952191232	0	29.3655526295902	0.957314831739385	LGALS2	ENSGALG00000003213
24.126826450392	0	0	36.9382228119512	0	0	LITAF	ENSGALG00000003217
607.638592083946	971.475696591253	741.590968481617	330.447344615023	585.213513118262	480.572045533171	TMEM231	ENSGALG00000003219
563.852870007309	313.84549602948	744.414284351471	379.365531582202	828.528092049152	578.218158370588	UPF1	ENSGALG00000003220
3404.56328799976	5448.93594751183	5649.4550555776	3985.33474230566	4196.12771682109	4642.01961910428	WDR61	ENSGALG00000003221
82.2099271642986	2.06477300019395	16.9398952191232	0	0	0	APOBEC2	ENSGALG00000003226
136.718683218888	84.6556930079519	173.163373351038	103.826356011971	81.8040394681442	98.6034276691566	RAB11FIP4	ENSGALG00000003227
618.361626061898	996.25297259358	679.478019344832	560.063324256882	793.918690735707	974.546498710694	OARD1	ENSGALG00000003228
167.100612823085	293.197766027541	174.104478640989	221.629336871707	584.164743381491	233.58481894441	ASH2L	ENSGALG00000003233
255.565643141189	132.145472012413	145.87131994245	362.39391569563	242.265809194119	177.103243871786	ZFR2	ENSGALG00000003235
58.0831007139066	44.3926195041699	63.9951597166878	88.8514008179368	46.1458684179275	16.2743521395695	GNA11	ENSGALG00000003238
3.57434465931733	7.22670550067882	0	17.9699462328411	3.14630921031324	6.70120382217569	CCDC28B	ENSGALG00000003241
4.46793082414666	0	1.88221057990258	14.9749551940343	0	3.82925932695754	STAR	ENSGALG00000003242
63.4446177028826	41.295460003879	52.7018962372723	11.9799641552274	1.04876973677108	53.6096305774056	RAD54L2	ENSGALG00000003243
453.941771733301	488.318814545869	641.833807746781	578.033270489724	523.336098648768	491.102508682304	LSM1	ENSGALG00000003245
288.628331239875	294.230152527638	311.505850973877	100.831364973164	238.070730247035	181.889818030483	NA	ENSGALG00000003246
284.160400415728	299.392085028123	390.558695329786	129.782945014964	600.945059169828	371.438154714881	NFYA	ENSGALG00000003247
1203.66056402511	895.079095584077	831.937076316941	1213.96970106305	1233.35321044279	709.370290318884	SUB1	ENSGALG00000003248
1530.71310035265	2013.1536751891	1656.34531031427	1197.99641552274	2145.78288143363	2309.0433741554	CHUK	ENSGALG00000003249
1176.85297908023	1203.76265911307	1156.61840135014	1516.46379598254	1144.20778281725	1423.52715479647	ITPA	ENSGALG00000003250
660.360175808877	702.022820065943	759.471968990692	516.136789021049	556.896730225443	740.004364934544	BAG4	ENSGALG00000003254
1167.91711743194	937.406942088053	456.436065626376	697.832912041998	519.141019701684	864.455293060665	ATP6V0A1	ENSGALG00000003256
102.762408955373	206.477300019395	141.165793492694	88.8514008179368	104.876973677108	83.2863903613265	NA	ENSGALG00000003258
1877.42453230643	2333.19349021916	2003.6131623063	2363.04792961861	1845.8347367171	2493.8051366811	EIF2B1	ENSGALG00000003259
1780.02364034003	1869.65195167562	1909.50263331117	2074.53045954688	1955.95555907806	2264.04957706365	UTP6	ENSGALG00000003260
1531.60668651748	2145.29914720151	873.345709074798	332.444005307561	188.778552618794	423.133155628808	PTRF	ENSGALG00000003261
1969.46390728385	2316.67530621761	2588.980652656	1874.86439029309	2153.12426959103	2483.27467353196	PTP4A2	ENSGALG00000003265
4051.5196713362	3513.21125983	1931.14805498005	3377.35156142787	1599.3738485759	2253.51911391451	STAT3	ENSGALG00000003267
267.18226328397	308.683563528995	715.240020362981	338.433987385175	717.358499951418	466.21232305708	KHDRBS1	ENSGALG00000003272
728.272724335906	789.775672574185	841.348129216454	286.520809379189	1041.42834861368	1060.70483356724	HSDL1	ENSGALG00000003273
16.9781371317573	2.06477300019395	57.4074226870288	34.9415621194133	5.2438486838554	3.82925932695754	NA	ENSGALG00000003277
1458.33262100147	1151.11094760813	1600.82009820715	1670.20666930796	997.380019669296	1762.41660523221	GSS	ENSGALG00000003281
268.969435613629	375.788686035299	466.78822381584	193.676087176177	142.632684200867	163.700836227435	STAT5A	ENSGALG00000003282
58.976686878736	76.3966010071761	7.52884231961033	169.716158865722	326.167388135806	930.510016450682	COMP	ENSGALG00000003283
894.479750994162	339.655158531905	529.842278242577	591.01156499122	672.261401270262	197.206855338313	CRLF3	ENSGALG00000003284
35.7434465931733	133.17785851251	24.4687375387336	60.8981511224061	103.828203940337	40.2072229330542	CDHR2	ENSGALG00000003285
19.6588956262453	1.03238650009697	0	0	36.7069407869878	21.0609262982665	ACSBG1	ENSGALG00000003286
1029.41126188339	1033.41888659707	1191.43929707833	751.742750740521	1547.98413147411	896.046682508064	TMEM39B	ENSGALG00000003287
1673.68688672534	1109.81548760425	586.308595639654	2191.33511006035	784.479763104767	796.485940007168	TARS	ENSGALG00000003288
201.950473251429	250.869919523565	366.089957791052	281.529157647845	760.358059159032	197.206855338313	NA	ENSGALG00000003289
1771.08777869174	1080.90866560153	1591.40904530763	1503.48550148104	1768.22577619604	1000.39399916766	MBTPS1	ENSGALG00000003293
201.950473251429	154.857975014546	351.032273151832	149.749551940343	354.484171028625	188.591021852659	ATAD5	ENSGALG00000003294
20.5524817910747	0	0	13.9766248477653	1.04876973677108	0	ADAMTS12	ENSGALG00000003295
1853.29770585604	1646.65646765467	1321.31182709161	1537.42873325419	1928.68754592201	1400.55159883472	HDAC1	ENSGALG00000003297
290.415503569533	357.205729033553	366.089957791052	335.438996346368	92.2917368358549	595.449825341897	DDX55	ENSGALG00000003298
88.4650303181039	57.8136440054306	55.5252121071262	16.9716158865722	250.655967088288	107.219261154811	WHSC1L1	ENSGALG00000003299
130.463580065083	141.436950513285	232.453006617969	200.664399600059	191.924861829107	273.792041877464	CRTC1	ENSGALG00000003304
3947.86367621599	4862.54041545675	2610.62607432488	3690.82729015632	4175.15232208567	3965.19803306453	TMED2	ENSGALG00000003307
3371.50059990107	2510.76396823584	2300.06132864096	3500.14619401895	1837.44457882293	1709.76428948654	ERLIN1	ENSGALG00000003308
167.994198987915	11.3562515010667	97.8749501549343	65.8898028537509	2.09753947354216	40.2072229330542	NA	ENSGALG00000003309
37.530618922832	0	0	0	0	0	SLC45A2	ENSGALG00000003310
100.081650460885	37.1659140034911	49.8785803674184	197.669408561253	8.39015789416863	87.115649688284	MTMR9LP	ENSGALG00000003313
100.975236625715	126.983539511928	200.455426759625	383.358852967278	131.096217096385	158.914262068738	RILPL1	ENSGALG00000003314
305.606468371632	560.585869552657	424.438485768032	161.72951609557	538.018874963564	521.736583297965	SNRNP35	ENSGALG00000003318
0.893586164829333	34.0687545032002	0	23.9599283104549	50.3409473650118	0	ADAP2	ENSGALG00000003319
712.188173368978	878.560911582525	1047.45018771579	807.649250131583	963.819388092622	1206.21668799162	RILPL2	ENSGALG00000003321
107.23033977952	5.16193250048487	48.9374750774671	12.9782945014964	0	60.3108343995812	TBC1D2B	ENSGALG00000003322
15.1909648020987	6.19431900058185	65.8773702965904	0	0	46.9084267552299	NECAB2	ENSGALG00000003323
1547.6912374844	310.748336529189	2173.01211449753	1225.94966521827	362.874328922793	344.633339426179	PRRX1	ENSGALG00000003324
115.272615262984	138.339791012995	68.7006861664443	153.742873325419	246.460888141204	111.048520481769	KMT5A	ENSGALG00000003325
528.109423414136	392.30687003685	304.918113944218	292.510791456803	114.315901308048	356.121117407051	AMACR	ENSGALG00000003326
858.736304400989	863.075114081071	665.361439995563	892.507329564444	444.678368390938	813.717606978477	GORAB	ENSGALG00000003329
2132.99017544762	2729.6299062564	1957.49900309869	1923.78257726027	2197.17259853541	2464.12837689718	FAF2	ENSGALG00000003331
68.8061346918586	30.9715950029092	36.7031063081004	47.9198566209097	2.09753947354216	106.261946323072	GHDC	ENSGALG00000003333
4.46793082414666	0	2.82331586985387	0	0	0	NA	ENSGALG00000003334
23.2332402855627	56.7812575053336	8.46994760956162	3.99332138507581	8.39015789416863	43.0791674282723	DAPK2	ENSGALG00000003336
6949.41960387772	8557.45169930382	7911.8721726205	6293.47450287948	7422.14342712893	6734.70984128657	EIF3I	ENSGALG00000003337
613.893695237752	54.7164845051396	684.183545794589	469.215262746408	157.315460515662	779.254273035859	MTOR	ENSGALG00000003339
297.564192888168	387.144937536365	79.9939496458598	222.627667217976	377.557105237588	141.682595097429	GBGT1	ENSGALG00000003340
5375.81436761327	5754.52235154054	6184.94396555989	4650.22275292078	5817.52572986917	5326.49972379794	CLTB	ENSGALG00000003344
2.680758494488	17.5505705016486	9.41105289951291	0.998330346268953	5.2438486838554	14.3597224760908	PIBPPDD4L	ENSGALG00000003345
944.520576224605	1057.1637760993	947.69302698095	997.332015922684	918.722289411465	720.858068299757	HIGD2A	ENSGALG00000003348
67.9125485270293	0	119.520371823814	49.9165173134476	19.9266249986505	0	PLEKHA2	ENSGALG00000003349
1891.7219109437	2557.22136074021	1273.3154573041	1107.14835401227	1690.61681567498	2062.05614756663	RAI14	ENSGALG00000003353
4.46793082414666	0	0	16.9716158865722	0	0	KCNH4	ENSGALG00000003354
1216.17077033272	1050.96945709872	2014.90642578571	1649.24173203631	1596.22753936558	1330.66761611774	NOP16	ENSGALG00000003355
1299.27428366185	1557.87122864633	1231.90682454624	1178.02980859736	1131.62254597599	1188.98502102032	TM2D2	ENSGALG00000003356
1225.10663198102	1061.29332209969	1449.30214652499	1433.60237724222	908.234592043754	1024.32686996114	FKBP8	ENSGALG00000003357
1435.99296688074	923.985917586792	681.360229924735	748.747759701714	1435.76576963961	432.706303946202	UBIAD1	ENSGALG00000003358
4489.37689210257	4135.74031938848	5101.73177682595	4334.75036349979	3544.84171028625	4884.22027153434	RAB5C	ENSGALG00000003359
82.2099271642986	171.376159016098	44.2319486277107	33.9432317731444	57.6823355224093	61.2681492313206	ARL10	ENSGALG00000003360
6.25510315380533	0	0	0	1.04876973677108	0	TREMB1	ENSGALG00000003361
850.694028917525	451.152900542378	275.743849955728	857.56576744503	426.849282865829	699.79714200149	ACSS2	ENSGALG00000003362
510.237700117549	190.99150251794	189.16216328021	224.624327910514	576.823355224093	311.1273203153	RAD1	ENSGALG00000003365
92.9329611422506	73.2994415068852	130.813635303229	150.747882286612	280.021519717878	85.2010200248052	KAT2A	ENSGALG00000003369
1164.34277277262	834.168292078355	1385.3069868083	853.572446059954	950.185381514598	1194.72891001075	KIAA1191	ENSGALG00000003370
2131.20300311796	1613.62009965157	1441.77330420538	2183.3484672902	1701.10451304269	1387.14919119037	BRIX1	ENSGALG00000003373
43.7857220766373	0	31.9975798583439	0	0	0	ESRP2	ENSGALG00000003374
307.393640701291	197.185821518522	411.263011708714	329.449014268754	177.242085514312	327.40167245487	SIMC1	ENSGALG00000003377
146.548131032011	130.080699012219	181.633320960599	161.72951609557	135.291296043469	146.469169256126	NA	ENSGALG00000003378
251.991298481872	266.355717025019	695.476809274004	266.55420245381	546.409032857732	472.913526879256	HERC1	ENSGALG00000003381
909.670715796261	806.293856575737	669.125861155368	661.893019576316	596.749980222744	560.02917656754	KPNA6	ENSGALG00000003383
1364.50607369439	1016.90070259552	1621.52441458607	1432.60404689595	665.968782849635	1396.72233950776	LSM4	ENSGALG00000003385
414.62398048081	320.039815030062	431.967328087643	74.8747759701715	366.020638133107	235.499448607889	NA	ENSGALG00000003387
168.887785152744	369.594367034717	364.20774721115	128.784614668695	158.364230252433	205.822688823968	EIF2AK1	ENSGALG00000003391
1108.9404305532	1186.21208861142	1118.03308446213	1894.83099721847	1679.0803485705	2081.20244420142	SBNO1	ENSGALG00000003392
768.484101753226	577.104053554209	717.122230942884	646.918064382281	428.946822339371	543.754824427971	NFATC3	ENSGALG00000003396
981.157608982607	1359.65302062772	818.761602257623	786.684312859935	1434.71699990284	990.820850850263	RHOT1	ENSGALG00000003397
1403.82386494688	2020.38038068978	990.042765028758	1327.77936053771	890.405506518646	670.120382217569	ADAM9	ENSGALG00000003398
4326.74421010363	4778.91710894889	4748.81729309422	3759.71208404888	3656.01130238398	3345.81533692915	AIMP2	ENSGALG00000003400
21.446067955904	0	0	0	0	0	NA	ENSGALG00000003401
52.7215837249306	56.7812575053336	15.998789929172	35.9398924656823	34.6094013134456	72.7559272121932	ZNF385C	ENSGALG00000003403
1466.37489648494	1781.89909916738	1256.37556208497	1303.81943222725	848.454717047803	1214.83252147728	BSDC1	ENSGALG00000003405
138.505855548547	142.469337013382	86.5816866755188	87.8530704716678	167.803157883373	68.9266678852357	RP1-27O5.3	ENSGALG00000003408
221.609368877675	134.210245012607	192.926584440015	137.769587785115	327.216157872577	67.0120382217569	SOGA1	ENSGALG00000003409
134.931510889229	84.6556930079519	169.398952191232	99.8330346268953	84.9503486784574	190.505651516138	RGL4	ENSGALG00000003412
28.5947572745387	22.7125030021334	63.9951597166878	65.8898028537509	5.2438486838554	37.335278437836	NA	ENSGALG00000003415
0.893586164829333	39.230687003685	61.1718438468339	57.9031600835993	156.266690778891	55.5242602408843	FAM160A2	ENSGALG00000003416
246.629781492896	169.311386015904	187.279952700307	289.515800417996	83.9015789416863	133.066761611774	MPHOSPH9	ENSGALG00000003419
138.505855548547	200.282981018813	78.1117390659572	148.751221594074	169.900697356915	97.6461128374172	LOC112530206	ENSGALG00000003420
56.295928384248	13.4210245012607	5.64663173970775	42.928204889565	2.09753947354216	0	GALR1L	ENSGALG00000003425
0	0	0	7.98664277015162	0	0	RHBDL3	ENSGALG00000003426
596.021971941165	738.156347569337	519.490120053113	545.088369062848	859.991184152285	764.894550559769	USP3	ENSGALG00000003427
523.641492589989	301.456858028317	348.208957281978	753.739411433059	702.675723636623	399.200284835323	PIK3R2	ENSGALG00000003428
268.969435613629	311.780723029286	287.978218725095	289.515800417996	288.411677612047	278.578616036161	PBX1	ENSGALG00000003429
520.067147930672	1048.90468409853	934.517552921632	773.706018358438	819.089164418213	660.547233900176	PMS2	ENSGALG00000003430
216.247851888699	181.700024017067	19.7632110889771	104.82468635824	96.4868157829393	47.8657415869692	AGXT2	ENSGALG00000003432
1.78717232965867	0	0	14.9749551940343	0	0	LOC107054267	ENSGALG00000003433
45.572894406296	90.8500120085337	126.108108853473	133.77626640004	126.901138149301	97.6461128374172	C18H17orf75	ENSGALG00000003434
0	8.25909200077579	13.1754740593181	15.9732855403032	45.0970986811564	0	PGC	ENSGALG00000003435
2645.01504789483	2612.97023174544	6073.89354134563	3453.22466774431	2508.65721035642	5563.9138020693	NUF2	ENSGALG00000003438
354.753707437245	326.234134030644	559.016542231067	250.580916913507	140.535144727325	149.341113751344	PLEKHM2	ENSGALG00000003439
1095.53663808076	1330.746198625	1157.55950664009	1239.92629006604	1150.50040123787	930.510016450682	GTF3C5	ENSGALG00000003441
50.0408252304426	77.4289875072731	56.4663173970775	75.8731063164404	116.41344078159	35.4206487743572	NA	ENSGALG00000003443
2245.58203221611	3674.26355384513	4208.62285666217	2462.88096424551	4385.95503917665	3690.44867635533	MGST3	ENSGALG00000003445
238.587506009432	135.242631512704	215.513111398846	246.587595528431	11.5364671044819	186.67639218918	PRLR	ENSGALG00000003446
72.380479351176	116.659674510958	61.1718438468339	39.9332138507581	27.2680131560481	2.87194449521815	FRS3	ENSGALG00000003447
12335.0634193041	11556.5344820855	13600.8536503761	12948.3445911083	12993.2082688569	16485.9187173839	ZNF207	ENSGALG00000003454
33.0626880986853	0	0	0	0	32.5487042791391	CA12	ENSGALG00000003456
277.011711097093	551.294391051784	255.0395335768	315.472389420989	36.7069407869878	256.560374906155	CNP	ENSGALG00000003457
1304.63580065083	2177.30312870452	1339.19282760069	1346.74763711682	1604.61769725975	1802.62382816526	CCZ1	ENSGALG00000003458
99.1880642960559	53.6840980050427	87.5227919654701	37.9365531582202	0	91.9022238469809	USP49	ENSGALG00000003461
78.6355825049813	110.465355510376	36.7031063081004	49.9165173134476	1.04876973677108	53.6096305774056	TTC25	ENSGALG00000003464
1451.18393168284	358.23811553365	913.813236542704	647.91639472855	17.8290855251083	74.670556875672	NA	ENSGALG00000003465
934.691128411482	1448.43825963606	1550.00041254978	1131.10828232272	2301.00080247575	2141.513278601	LOC425137	ENSGALG00000003466
112.591856768496	68.1375090064003	463.964907945987	142.76123951646	143.681453937638	205.822688823968	BYSL	ENSGALG00000003467
8.042275483464	0	0	12.9782945014964	0	0	ZMAT4	ENSGALG00000003470
5.361516988976	9.29147850087277	18.8221057990258	2.99499103880686	2.09753947354216	69.8839827169751	VWC2L	ENSGALG00000003472
2482.38236589589	2193.82131270607	4709.29087091626	2601.64888237689	2938.65280243256	1836.12984727614	SFRP1	ENSGALG00000003473
989.199884466071	752.609758570694	1235.67124570605	1285.84948599441	862.088723625827	1397.6796543395	MED20	ENSGALG00000003474
3516.26155860342	2611.93784524535	1712.81162771135	3050.89753819792	1658.10495383508	1738.48373443872	ACLY	ENSGALG00000003475
419.985497469786	155.890361514643	92.2283184152265	303.492425265762	588.359822328575	166.572780722653	ERN1	ENSGALG00000003476
7.14868931863466	0	0	0	0	0	GFI1B	ENSGALG00000003478
28.5947572745387	19.6153435018425	0.941105289951291	4.99165173134476	0	28.7194449521815	NA	ENSGALG00000003479
3046.2352359032	4089.28292688412	3095.2952986498	2987.00439603671	3577.35357212615	3887.65553169364	GOLGA7	ENSGALG00000003483
209.099162570064	246.740373523177	132.695845883132	78.8680973552473	284.216598664962	46.9084267552299	BARD1	ENSGALG00000003484
225.183713536992	141.436950513285	265.391691766264	172.711149904529	91.2429670990839	149.341113751344	CCND3	ENSGALG00000003485
164.419854328597	219.898324520656	260.686165316508	127.786284322426	152.071611831806	188.591021852659	RAB8B	ENSGALG00000003487
2782.62731727854	3220.01349380246	2772.4961841965	2520.78412432911	1877.29782882023	2717.81680730811	PPP1RL	ENSGALG00000003492
7797.43287430076	11079.5719190407	11525.7164860335	7120.09202959017	8090.2097494521	10894.2427851942	ALDH9A1	ENSGALG00000003495
7.14868931863466	80.526147007564	13.1754740593181	13.9766248477653	0	28.7194449521815	TEX2	ENSGALG00000003496
893.586164829333	1022.062635096	655.95038709605	515.13845867478	542.213953910648	630.870474116255	TAF8	ENSGALG00000003498
38.4242050876613	20.6477300019395	27.2920534085874	26.9549193492617	38.8044802605299	9.57314831739385	MAST3	ENSGALG00000003499
72.380479351176	65.0403495061094	194.808795019917	78.8680973552473	188.778552618794	219.225096468319	NA	ENSGALG00000003500
1956.06011481141	1320.42233362403	2269.00485407256	2318.12306403651	1663.34880251893	1855.27614391093	MYBL2	ENSGALG00000003503
82.2099271642986	151.760815514255	47.0552644975646	150.747882286612	88.0966578887706	93.8168535104597	LACTB	ENSGALG00000003505
35.7434465931733	47.4897790044608	14.1165793492694	47.9198566209097	17.8290855251083	64.1400937265388	TECPR1	ENSGALG00000003507
8.042275483464	0	0	0	0	12.445092812612	SPACA9	ENSGALG00000003509
593.341213446677	1073.68196010085	618.306175497998	769.712696973363	699.52941442631	914.235664311112	UCK2	ENSGALG00000003510
720.230448852442	586.395532055082	825.349339287282	608.981511224061	1393.81498016876	984.119647028088	ZBTB8OS	ENSGALG00000003517
2461.82988410481	2586.12818274292	1689.28399546257	1881.85270271698	2462.51134193849	1750.92882725133	GPAT4	ENSGALG00000003518
176.036474471379	118.724447511152	143.048004072596	157.736194710495	178.290855251083	154.127687910041	POLG2	ENSGALG00000003520
5542.02139427152	4308.14886490467	5057.49982819824	5120.43634601346	3343.4779208262	4832.52527062041	TPM1	ENSGALG00000003521
21214.6291392132	19099.150251794	25409.8428286849	21397.2143115825	21271.147801191	29807.9119158692	RBBP4	ENSGALG00000003522
1052.64450216895	1762.28375566554	2369.70312009735	1348.74429780935	1636.08078936288	2303.29948516496	IFT52	ENSGALG00000003523
1283.18973269492	1230.60470811559	814.997181097818	1015.30196215552	1097.01314466255	989.863536018524	TUBGCP2	ENSGALG00000003526
31.2755157690266	139.372177513092	11.2932634794155	61.8964814686751	73.4138815739755	54.5669454091449	ARRDC2	ENSGALG00000003527
14.2973786372693	192.023889018037	17.8810005090745	5.98998207761372	0	10.5304631491332	SYNC	ENSGALG00000003529
18803.7336665036	18939.130344279	11313.0266905045	15979.2755223809	15685.4001831483	13431.1270893036	DDX5	ENSGALG00000003532
289.521917404704	310.748336529189	313.38806155378	469.215262746408	202.412559196818	239.328707934846	ZFP511	ENSGALG00000003533
233.225989020456	80.526147007564	295.507061044705	157.736194710495	349.240322344769	276.663986372682	KLHL11	ENSGALG00000003536
36.6370327580026	19.6153435018425	59.2896332669313	60.8981511224061	123.754828938987	23.9328707934846	KIAA1522	ENSGALG00000003539
802.440376016741	667.954065562742	671.008071735271	881.525695755485	391.191111815612	898.918627003282	CEP95	ENSGALG00000003540
3.57434465931733	0	0	0	0	0	CFAP77	ENSGALG00000003545
3115.04137059505	2678.01058125155	2481.69464960155	2944.07619114714	2463.56011167526	2673.7803250481	SKP2	ENSGALG00000003547
411.049635821493	1219.24845661453	223.041953718456	403.325459892657	834.820710469779	901.790571498501	BAIAP2L1	ENSGALG00000003548
1202.76697786028	1297.7098306219	1295.90198426293	1689.17494588707	1730.47006567228	1497.2403968404	MTG1	ENSGALG00000003549
166.207026658256	25.8096625024244	50.8196856573697	173.709480250798	40.9020197340721	57.4388899043631	ARHGAP40	ENSGALG00000003550
1.78717232965867	35.1011410032971	60.2307385568826	50.9148476597166	0	24.890185625224	OPTC	ENSGALG00000003554
73.2740655160053	132.145472012413	57.4074226870288	334.440666000099	56.6335657856383	53.6096305774056	LIPML3	ENSGALG00000003557
38.4242050876613	0	73.4062126162007	74.8747759701715	35.6581710502167	14.3597224760908	NADK2	ENSGALG00000003558
159.951923504451	200.282981018813	50.8196856573697	127.786284322426	58.7311052591804	70.8412975487145	ACTR5	ENSGALG00000003559
811.376237665034	1233.70186761588	355.737799601588	23.9599283104549	25.1704736825059	91.9022238469809	SLC6A2	ENSGALG00000003560
21.446067955904	292.165379527444	38.5853168880029	186.687774752294	98.5843552564814	114.877779808726	NPTX2	ENSGALG00000003562
2943.47282694782	4473.33070492019	4345.08312370511	2740.41680050828	3667.54776948846	4504.16628333381	YARS	ENSGALG00000003563
124.208476911277	123.886380011637	68.7006861664443	131.779605707502	12.5852368412529	174.231299376568	SMURF2	ENSGALG00000003566
1.78717232965867	0	0	0	0	21.0609262982665	FNDC5	ENSGALG00000003567
73.2740655160053	11.3562515010667	154.341267552012	94.8413828955505	0	43.0791674282723	PPP1R16B	ENSGALG00000003568
110.804684438837	216.801165020365	90.346107835324	269.549193492617	53.487256575325	220.182411300059	TMEM130	ENSGALG00000003569
4264.19317856558	4703.55289444182	3275.98751432044	3287.50183026366	5589.94269698985	3616.7354343114	ATIC	ENSGALG00000003570
172.462129812061	115.627288010861	149.635741102255	189.682765791101	132.144986833156	141.682595097429	ARHGEF18	ENSGALG00000003572
437.857220766373	415.019373038984	117.638161243911	480.196896555366	167.803157883373	115.835094640466	LPCAT2	ENSGALG00000003574
190.333853108648	236.416508522207	247.51069125719	154.741203671688	247.509657877975	125.408242957859	NA	ENSGALG00000003575
1654.92157726392	1439.14678113518	3350.3348322266	1987.67571942148	4499.22217074793	2666.12180639419	FN1	ENSGALG00000003578
7955.59762547555	3412.0373828205	3484.91288868963	3703.80558465781	4458.32015101386	5723.78537896978	MMP2	ENSGALG00000003580
3.57434465931733	0	0.941105289951291	0	3.14630921031324	85.2010200248052	SLC1A3	ENSGALG00000003582
15397.3832061742	7677.8584012212	18770.3450080785	21572.9204525258	13306.7904201515	22242.2528006329	KPNA2	ENSGALG00000003584
19.6588956262453	0	0	0	0	46.9084267552299	VTN	ENSGALG00000003589
41.1049635821493	2.06477300019395	47.0552644975646	178.701131982143	7.34138815739755	44.9937970917511	C18H17orf58	ENSGALG00000003590
5.361516988976	0	36.7031063081004	61.8964814686751	0	0	ANK1	ENSGALG00000003594
29.488343439368	0	17.8810005090745	0	13.634006578024	2.87194449521815	NA	ENSGALG00000003595
384.242050876613	602.913716056633	468.670434395743	650.911385767357	833.771940733008	412.602692479675	TRRAP	ENSGALG00000003596
1018.68822790544	1687.95192765855	1438.00888304557	1462.55395728402	1303.62078280645	1287.58844868947	AK2	ENSGALG00000003597
1364.50607369439	869.269433081652	1268.60993085434	1039.26189046598	910.332131517297	860.626033733707	ATP2B4	ENSGALG00000003601
20.5524817910747	60.9108035057215	58.3485279769801	34.9415621194133	34.6094013134456	56.4815750726237	RPGRIP1L	ENSGALG00000003602
42.892135911808	45.4250060042669	0.941105289951291	21.963267617917	0	75.6278717074114	SLC46A1	ENSGALG00000003604
1014.22029708129	427.408011040147	650.303755356342	830.610848095769	469.848842073443	605.980288491031	LOC427439	ENSGALG00000003605
186.759508449331	75.3642145070791	243.746270097384	193.676087176177	253.802276298601	293.895653343991	AZIN2	ENSGALG00000003614
28.5947572745387	54.7164845051396	50.8196856573697	28.9515800417996	4.19507894708432	50.7376860821874	KLHL10	ENSGALG00000003624
2800.49904057513	3211.75440180169	3760.65673864536	3254.55692883679	3199.79646688856	3746.93025142795	NDUFS5	ENSGALG00000003625
72.380479351176	38.1983005035881	47.0552644975646	71.8797849313646	53.487256575325	137.853335770471	TLN2	ENSGALG00000003628
80.42275483464	243.643214022886	28.2331586985387	75.8731063164404	139.486374990554	34.4633339426179	CZH5ORF42	ENSGALG00000003631
40.21137741732	78.4613740073701	40.4675274679055	46.9215262746408	112.218361834505	49.780371250448	PTEN	ENSGALG00000003634
711.294587204149	595.687010555954	715.240020362981	645.919734036012	477.190230230841	455.681859907947	FBLIM1	ENSGALG00000003636
1013.32671091646	1145.94901510764	868.640182625042	493.175191056863	887.259197308333	1056.87557424028	KAT6A	ENSGALG00000003641
68.8061346918586	44.3926195041699	0	21.963267617917	56.6335657856383	10.5304631491332	PDGFA	ENSGALG00000003642
119.740546087131	36.1335275033941	19.7632110889771	0	0	23.9328707934846	C2CD4A	ENSGALG00000003644
45.572894406296	5.16193250048487	0	46.9215262746408	34.6094013134456	56.4815750726237	PITPNM2	ENSGALG00000003645
1807.72481144974	2168.01165020365	2058.19726912347	2513.79581190522	3130.57766426167	3954.6675699154	SVIP	ENSGALG00000003648
1169.7042897616	1742.66841216369	1390.95361854801	1470.54060005417	2032.51574986235	1572.86826854781	NOL11	ENSGALG00000003650
2671.8226328397	2774.02252576057	2965.42276863652	2508.80416017388	3417.94057213695	3039.47459077255	NT5C3B	ENSGALG00000003651
923.074508268701	1977.02014768571	1426.71561956616	730.777813468873	1460.93624332211	1253.12511474685	ATAD1	ENSGALG00000003652
4921.87259587997	6322.33492659387	3121.64624676843	4373.68524700428	6481.39697324527	8261.62699791089	GAS2	ENSGALG00000003655
56.295928384248	78.4613740073701	140.224688202742	19.9666069253791	79.706499994602	45.9511119234905	UNC119	ENSGALG00000003657
392.284326360077	143.501723513479	386.794274169981	226.620988603052	457.26360523219	190.505651516138	DHX35	ENSGALG00000003658
369.051086074514	373.723913035105	373.618800110663	449.248655821029	465.653763126359	540.882879932752	FANCF	ENSGALG00000003660
188.546680778989	115.627288010861	137.401372332889	162.727846441839	114.315901308048	185.719077357441	SETX	ENSGALG00000003661
39.3177912524906	16.5181840015516	23.5276322487823	59.8998207761372	18.8778552618794	51.6950009139268	RBL2	ENSGALG00000003663
3481.41169817508	2975.33789327948	2651.09360179279	3683.83897773244	3853.18001289694	3266.35820589478	PIGS	ENSGALG00000003665
11.6166201427813	9.29147850087277	33.8797904382465	33.9432317731444	65.0237236798069	62.22546406306	MAFB	ENSGALG00000003670
509.34411395272	563.683029052948	715.240020362981	581.02826152853	380.703414447902	791.699365848471	UBLCP1	ENSGALG00000003672
1600.41282120934	2382.74804222382	1311.9007741921	1668.21000861542	2290.51310510804	1723.16669713089	DHTKD1	ENSGALG00000003674
268.0758494488	309.715950029092	183.515531540502	223.625997564245	99.6331249932525	156.04231757352	PRKAR1B	ENSGALG00000003675
28.5947572745387	0	47.0552644975646	84.858079432861	102.779434203566	20.1036114665271	NTNG2	ENSGALG00000003677
1426.16351906762	1501.089971141	1559.41146544929	1893.8326668722	1948.61417092066	1841.87373626658	TOP1	ENSGALG00000003681
402.1137741732	421.213692039566	641.833807746781	815.635892901734	737.285124950069	604.065658827552	ARL6IP4	ENSGALG00000003682
1727.3020566151	1991.47355868706	2219.12627370514	2031.60225465732	2595.70509850842	2401.90291283412	MED27	ENSGALG00000003683
23.2332402855627	35.1011410032971	177.868899800794	63.893142161213	55.5847960488672	42.1218525965329	NA	ENSGALG00000003684
471.813495029888	379.918232035687	293.624850464803	550.080020794193	733.090046002984	597.364455005376	OGFOD2	ENSGALG00000003687
1175.06580675057	375.788686035299	576.897542740141	1629.27512511093	216.046565774842	336.017505940524	NUP155	ENSGALG00000003688
2299.19720210587	4400.03126341331	611.718438468339	1297.82945014964	2060.83253275517	1701.14845600089	PAPSS2	ENSGALG00000003689
76.8484101753226	38.1983005035881	114.814845374058	110.814668435854	84.9503486784574	124.45092812612	KRT14	ENSGALG00000003690
214.46067955904	132.145472012413	274.802744665777	383.358852967278	441.532059180624	270.920097382246	RNF145	ENSGALG00000003691
1341.27283340883	1319.38994712393	1884.09279048249	1851.90279232891	1156.7930196585	1721.25206746741	MACF1	ENSGALG00000003693
0.893586164829333	8.25909200077579	0	1.99666069253791	2.09753947354216	0	MINPP1	ENSGALG00000003695
1664.75102507705	1823.19455917126	1863.38847410356	1688.1766155408	2174.09966432645	2236.2874469432	NA	ENSGALG00000003696
83.1035133291279	0	69.6417914563956	196.671078214984	171.998236830457	229.755559617452	EBF1	ENSGALG00000003699
833.715891785768	862.042727580974	527.960067662674	494.173521403132	684.846638111515	728.516586953672	SGMS1	ENSGALG00000003701
1167.02353126711	1288.41835212102	968.397343359879	1287.84614668695	1678.03157883373	1293.33233767991	CLINT1	ENSGALG00000003702
742.570102973176	557.488710052366	623.011701947755	660.894689230047	491.873006545636	676.821586039745	USE1	ENSGALG00000003703
153.696820350645	122.85399351154	93.1694237051778	76.8714366627094	112.218361834505	44.9937970917511	VPS13C	ENSGALG00000003705
1368.08041835371	1003.47967809426	825.349339287282	807.649250131583	467.751302599901	902.74788633024	WDR70	ENSGALG00000003708
92.9329611422506	93.9471715088247	0	232.610970680666	36.7069407869878	170.40204004961	PLAT	ENSGALG00000003709
163.526268163768	96.0119445090186	184.456636830453	348.417290847864	69.2188026268912	149.341113751344	RAPGEF1	ENSGALG00000003712
72.380479351176	324.16936103045	92.2283184152265	0	0	0	NA	ENSGALG00000003713
0.893586164829333	5.16193250048487	0	0	0	0	GDNF	ENSGALG00000003716
562.06569767765	553.359164051978	303.035903364316	624.954796764364	728.8949670559	538.010935437534	MYO9B	ENSGALG00000003717
319.903847008901	14.4534110013576	295.507061044705	258.567559683659	48.2434078914696	122.536298462641	FANCD2	ENSGALG00000003720
378.880533887637	519.290409548778	627.717228397511	361.395585349361	496.06808549272	486.315934523607	THG1L	ENSGALG00000003722
50.0408252304426	19.6153435018425	65.8773702965904	159.732855403032	7.34138815739755	115.835094640466	EGFLAM	ENSGALG00000003726
738.102172149029	779.451807573216	1608.34894052676	1112.14000574361	550.604111804817	765.851865391508	NA	ENSGALG00000003727
784.568652720154	572.974507553821	357.620010181491	314.47405907472	81.8040394681442	402.072229330542	FBXO42	ENSGALG00000003731
2045.41873129434	1746.79795816408	1212.14361345726	1887.84268479459	1237.54828938987	1718.3801229722	UCK1	ENSGALG00000003732
512.918458612037	156.92274801474	200.455426759625	422.293736471767	339.80139471383	499.718342167959	LIFR	ENSGALG00000003733
1547.6912374844	1819.06501317087	1851.15410533419	1070.21013120032	1293.13308543874	1499.15502650388	SZRD1	ENSGALG00000003734
22.3396541207333	0	16.9398952191232	10.9816338089585	0	0	ABCB9	ENSGALG00000003736
1948.01783932795	2823.57707776523	1727.86931235057	2128.44029824541	1844.78596698033	2369.35420855498	EMC3	ENSGALG00000003738
31.2755157690266	76.3966010071761	26.3509481186362	107.819677397047	91.2429670990839	129.237502284817	MYO18A	ENSGALG00000003741
125.102063076107	171.376159016098	0	57.9031600835993	214.997796038071	237.414078271367	CPAMD8	ENSGALG00000003742
119.740546087131	72.2670550067882	73.4062126162007	175.706140943336	142.632684200867	115.835094640466	VPS37B	ENSGALG00000003743
47.3600667359546	11.3562515010667	0	30.9482407343375	1.04876973677108	43.0791674282723	ADAM19	ENSGALG00000003744
1723.72771195578	1763.31614216563	2266.18153820271	1478.52724282432	1648.66602620414	2329.14698562192	NECAP2	ENSGALG00000003745
71.4868931863466	42.3278465039759	34.8208957281978	50.9148476597166	7.34138815739755	6.70120382217569	OSMR	ENSGALG00000003747
448.580254744325	906.435347085143	306.800324524121	307.485746650837	472.995151283757	358.993061902269	ANO5	ENSGALG00000003748
929.329611422506	1059.2285490995	1599.8789929172	1644.25008030496	2772.94718402273	1930.90401561834	PLCG1	ENSGALG00000003750
67.0189623622	58.8460305055275	10.3521581894642	7.98664277015162	0	16.2743521395695	CYLD	ENSGALG00000003753
639.807694017802	372.691526535008	370.795484240809	597.999877415103	776.089605210599	454.724545076208	POMT1	ENSGALG00000003757
3.57434465931733	0	5.64663173970775	21.963267617917	12.5852368412529	16.2743521395695	MREG	ENSGALG00000003758
170.674957482403	111.497742010473	198.573216179722	365.388906734437	208.705177617445	213.481207477883	RORA	ENSGALG00000003759
243.055436833579	104.271036509794	148.694635812304	200.664399600059	369.16694734342	196.249540506574	KIAA0100	ENSGALG00000003766
131.357166229912	140.404564013189	211.748690239041	230.614309988128	175.14454604077	173.273984544829	NKD1	ENSGALG00000003767
2698.63021778459	6488.54915310948	1198.96813939794	1181.02479963617	1089.67175650515	884.558904527192	ANXA2	ENSGALG00000003770
75.9548240104933	40.263073503782	16.9398952191232	65.8898028537509	5.2438486838554	66.0547233900176	SIN3B	ENSGALG00000003771
1235.82966595897	809.391016076028	767.941916600254	1432.60404689595	1237.54828938987	779.254273035859	ATP13A2	ENSGALG00000003774
187.65309461416	8.25909200077579	364.20774721115	281.529157647845	145.77899341118	86.1583348565446	RICTOR	ENSGALG00000003775
38.4242050876613	0	0	9.98330346268953	3.14630921031324	41.1645377647936	NELL1	ENSGALG00000003777
343.137087294464	274.614809025795	45.173053917662	372.377219158319	232.82688156318	191.462966347877	TMEM38A	ENSGALG00000003778
685.380588424098	297.327312027929	285.154902855241	442.260343397146	690.09048679537	259.432319401373	SUN1	ENSGALG00000003781
2365.32257830324	2512.82874123604	2485.45907076136	2608.63719480077	2597.80263798196	3119.88903663866	BRD7	ENSGALG00000003786
392.284326360077	381.983005035881	341.621220252319	354.407272925478	379.654644711131	546.626768923189	BNIP2	ENSGALG00000003788
0.893586164829333	0	0	0.998330346268953	5.2438486838554	0	NA	ENSGALG00000003789
26.80758494488	0	41.4086327578568	43.9265352358339	245.412118404432	105.304631491332	FYB	ENSGALG00000003792
1470.84282730908	1546.51497714527	1118.03308446213	1201.98973690782	1561.61813805214	1089.42427851942	GTF2A2	ENSGALG00000003793
81.3163409994693	110.465355510376	55.5252121071262	87.8530704716678	216.046565774842	27.7621301204422	SLC35E1	ENSGALG00000003794
1263.53083706868	1560.96838814663	1089.7999257636	1032.2735780421	1406.40021701002	1548.93539775432	DENR	ENSGALG00000003795
1606.66792436314	1925.40082268086	1417.30456666664	1727.11149904529	1724.17744725165	1567.12437955737	GET4	ENSGALG00000003798
193.014611603136	338.622772031808	256.921744156703	425.288727510574	680.65155916443	342.7187097627	USP4	ENSGALG00000003799
348.49860428344	77.4289875072731	402.793064099153	531.111744215083	154.169151305349	268.048152887028	PABPC4	ENSGALG00000003800
400.326601843541	1822.16217267116	102.580476604691	543.09170837031	13.634006578024	107.219261154811	OTUD7A	ENSGALG00000003802
848.013270423037	370.626753534814	543.958857591846	785.685982513666	543.262723647419	488.230564187086	DAB2	ENSGALG00000003803
33.0626880986853	4.1295460003879	40.4675274679055	25.9565890029928	25.1704736825059	12.445092812612	PRKG1	ENSGALG00000003805
17278.38208314	18227.8160457122	20865.2453835101	17674.4404503455	18812.8315381996	23073.2020745827	RHOA	ENSGALG00000003806
1072.3033977952	1144.91662860754	1160.38282250994	755.736072125597	1064.50128282265	931.467331282421	GPN3	ENSGALG00000003807
1248.33987226658	1465.9888301377	1921.73700208054	1400.65747581534	2088.10054591122	2375.09809754541	UBE2F	ENSGALG00000003812
0.893586164829333	0	2.82331586985387	0	0	0	DKK4	ENSGALG00000003814
12416.3797603036	13351.8546057542	10283.4575032978	13096.0974823561	13869.9797687975	13650.3521857719	RPN2	ENSGALG00000003815
0	0	0	0	0	59.3535195678419	NT5C1A	ENSGALG00000003816
7.14868931863466	11.3562515010667	10.3521581894642	61.8964814686751	0	0	CYFIP2	ENSGALG00000003818
66.1253761973706	200.282981018813	108.227108344398	136.771257438847	166.754388146602	193.377596011356	NA	ENSGALG00000003819
2369.79050912739	1956.37241768377	2658.6224441124	2122.45031616779	2108.02717090987	2522.52458163328	ARPC3	ENSGALG00000003820
42.892135911808	44.3926195041699	28.2331586985387	15.9732855403032	2.09753947354216	6.70120382217569	RAMP1	ENSGALG00000003821
2495.78615836833	1010.70638359494	1405.07019789728	2189.33844936781	1930.78508539556	1716.46549330872	CHERP	ENSGALG00000003824
676.444726775805	429.472784040341	419.732959318276	749.746090047983	603.04259864337	602.151029164073	ANAPC7	ENSGALG00000003826
16.084550966928	0	54.5841068171749	151.746212632881	36.7069407869878	66.0547233900176	HPCAL4	ENSGALG00000003829
1047.28298517998	1718.92352266146	1078.50666228418	1356.73094057951	1038.28203940337	1592.0145651826	TEX264	ENSGALG00000003832
1.78717232965867	12.3886380011637	0	0.998330346268953	0	0	CACNA1E	ENSGALG00000003833
2.680758494488	0	0	0	0	0	RBM44	ENSGALG00000003836
3.57434465931733	0	0.941105289951291	0.998330346268953	2.09753947354216	2.87194449521815	ADCY7	ENSGALG00000003837
75.9548240104933	79.493760507467	90.346107835324	113.809659474661	54.5360263120961	24.890185625224	LOC419677	ENSGALG00000003838
3.57434465931733	0	0	21.963267617917	0	12.445092812612	DGKK	ENSGALG00000003841
0.893586164829333	23.7448895022304	0	4.99165173134476	0	65.0974085582782	GHRH	ENSGALG00000003842
0	2.06477300019395	0	0	1.04876973677108	0.957314831739385	MKNK2	ENSGALG00000003845
28.5947572745387	0	0	0	0	2.87194449521815	TRPM1	ENSGALG00000003849
587.086110292872	185.829570017455	813.114970517916	248.584256220969	779.235914420912	762.97992089629	TRIT1	ENSGALG00000003851
539.726043556917	634.917697559639	396.205327069494	374.373879850857	526.482407859082	564.815750726237	IFT81	ENSGALG00000003854
13.40379247244	3.09715950029092	7.52884231961033	0	13.634006578024	5.74388899043631	SRC	ENSGALG00000003855
72.380479351176	11.3562515010667	31.0564745683926	38.9348835044892	47.1946381546986	31.5913894473997	KRT222	ENSGALG00000003859
13.40379247244	18.5829570017455	0	0	0	0	MID2	ENSGALG00000003860
422.666255964274	157.955134514837	200.455426759625	341.428978423982	393.288651289155	58.3962047361025	HERC4	ENSGALG00000003861
153.696820350645	143.501723513479	95.0516342850804	72.8781152776335	33.5606315766745	14.3597224760908	LRRFIP1	ENSGALG00000003862
25.0204126152213	0	0	0	57.6823355224093	7.65851865391508	P2RX7	ENSGALG00000003863
1058.89960532276	1181.05015611094	1780.57120858784	1513.46880494373	1487.15548674139	1678.17290003914	MED7	ENSGALG00000003870
709.50741487449	735.059188069046	258.803954736605	561.061654603151	531.726256542937	289.109079185294	ABL1	ENSGALG00000003875
83.1035133291279	16.5181840015516	0	169.716158865722	0	36.3779636060966	TIMD4	ENSGALG00000003876
1140.21594632223	1167.62913160968	1688.34289017262	1552.40368844822	1388.57113148491	1491.49650784996	PIN4	ENSGALG00000003878
864.991407554794	946.698420588926	900.637762483386	645.919734036012	1058.20866440202	872.11381171458	MFSD2A	ENSGALG00000003879
1565.56296078099	1132.52799060638	1571.64583421866	1570.37363468106	1418.98545385127	1091.3389081829	STX10	ENSGALG00000003880
663.040934303365	468.703471044026	678.536914054881	743.75610797037	475.092690757299	245.072596925283	ERCC6L	ENSGALG00000003881
10965.1958286207	11876.5742971156	11642.4135419874	9763.67078651036	12790.7957096601	13386.1332922118	SMARCE1	ENSGALG00000003882
0	0	0.941105289951291	0	65.0237236798069	24.890185625224	MTMR10	ENSGALG00000003883
2.680758494488	0	22.586526958831	18.9682765791101	48.2434078914696	17.2316669713089	KIAA1614	ENSGALG00000003885
18.765309461416	27.8744355026183	13.1754740593181	2.99499103880686	20.9753947354216	13.4024076443514	SGCD	ENSGALG00000003886
1402.93027878205	1661.10987865603	1258.25777266488	1075.20178293166	2363.92698668201	1866.7639218918	ZNF423	ENSGALG00000003891
130.463580065083	319.007428529965	26.3509481186362	96.8380435880884	317.777230241637	168.487410386132	XPR1	ENSGALG00000003893
0	48.5221655045578	0	0	0	0	RAB17	ENSGALG00000003899
301.138537547485	245.70798702308	331.269062062855	336.437326692637	149.974072358264	116.792409472205	P2RX4	ENSGALG00000003901
23.2332402855627	44.3926195041699	0	7.98664277015162	0	0	MLPH	ENSGALG00000003904
1115.19553370701	1052.00184359882	1432.36225130587	1083.18842570181	959.624309145537	1404.38085816168	MPHOSPH10	ENSGALG00000003906
95.6137196367386	179.635251016874	133.636951173083	57.9031600835993	131.096217096385	46.9084267552299	N4BP1	ENSGALG00000003907
1171.49146209126	1626.00873765273	1205.5558764276	1559.3920008721	933.40506572626	992.735480513742	PIGT	ENSGALG00000003909
91.1457888125919	188.926729517746	0	152.74454297915	105.925743413879	77.5425013708902	CACNG5	ENSGALG00000003911
336.881984140658	361.335275033941	456.436065626376	303.492425265762	249.607197351517	582.047417697546	MCEE	ENSGALG00000003913
17.8717232965867	0	42.3497380478081	0	0	22.9755559617452	CALR3	ENSGALG00000003914
711.294587204149	866.172273581362	587.249700929606	978.363739343574	647.090927587756	631.827788947994	SIAH1	ENSGALG00000003916
1141.10953248706	826.941586577677	1037.09802952632	1303.81943222725	1223.91428281185	1503.94160066257	MRPL22	ENSGALG00000003919
108.123925944349	98.0767175092126	70.5828967463468	43.9265352358339	12.5852368412529	56.4815750726237	OCRL	ENSGALG00000003920
1831.85163790013	4114.06020288644	2412.05285814516	1422.62074343326	818.040394681442	1386.19187635863	DBNDD2	ENSGALG00000003921
8077.12534389234	4357.70341690933	8135.85523162891	8145.37729520838	8210.81826918078	5904.71788216853	TOP2A	ENSGALG00000003922
898.05409565348	3463.65670782535	227.747480168212	459.231959283718	8.39015789416863	91.9022238469809	COL6A3	ENSGALG00000003923
993.667815290218	853.783635580198	1123.67971620184	1223.95300452574	727.846197319129	1121.97298279856	ACBD6	ENSGALG00000003924
28.5947572745387	0	0	5.98998207761372	0	0	MYPN	ENSGALG00000003925
1344.84717806815	1432.9524621346	1590.46794001768	1150.07655890183	1472.47271042659	1824.64206929527	SYS1	ENSGALG00000003929
1035.6663650372	898.176255084368	716.181125652933	1078.19677397047	1561.61813805214	1548.93539775432	APBA2	ENSGALG00000003930
587.086110292872	1355.52347462733	257.862849446654	407.318781277733	1413.74160516741	1232.06418844859	SDC4	ENSGALG00000003932
62.5510315380533	101.173877009503	114.814845374058	53.9098386985234	317.777230241637	101.475372164375	QSOX1	ENSGALG00000003933
89.3586164829333	23.7448895022304	178.810005090745	86.8547401253989	33.5606315766745	151.255743414823	PBLD	ENSGALG00000003935
1457.43903483664	1227.5075486153	1166.02945424965	1036.26689942717	1167.28071702621	1374.70409837776	PPT1	ENSGALG00000003936
1363.61248752956	1354.49108812723	1732.57483880033	1316.79772672875	1412.69283543064	1896.44068167572	GEMIN5	ENSGALG00000003937
1118.76987836632	882.690457582913	841.348129216454	1766.04638254978	2028.32067091527	2833.65190194858	KLF2	ENSGALG00000003939
986.519125971583	1099.49162260328	1267.66882556439	1170.04316582721	1239.64582886342	1310.56400465122	FUBP3	ENSGALG00000003941
511.131286282378	395.404029537141	384.912063590078	487.185208979249	466.70253286313	489.187879018826	LONP2	ENSGALG00000003942
25.9139987800507	2.06477300019395	78.1117390659572	15.9732855403032	9.43892763093971	44.9937970917511	FAM189A1	ENSGALG00000003944
14950.5901237596	12767.5238466993	14999.3361112437	16591.2520246437	17875.2313935263	19473.6983072426	HNRNPH3	ENSGALG00000003947
2164.26569121664	2239.24631871034	1676.10852140325	2278.18985018575	2037.75959854621	2223.84235413059	ALAS1	ENSGALG00000003948
1686.19709303295	1771.57523416641	2396.99517350594	1736.09647216171	1735.71391435614	2216.18383547668	CNOT8	ENSGALG00000003950
1151.83256646501	2429.20543472818	609.836227888437	1768.04304324232	1699.00697356915	1662.85586273131	RBPJL	ENSGALG00000003952
349.392190448269	140.404564013189	274.802744665777	562.05998494942	234.924421036722	300.596857166167	CEP350	ENSGALG00000003955
515.599217106525	642.144403060318	616.423964918096	597.001547068834	310.435842084239	555.242602408843	PRMT3	ENSGALG00000003958
947.201334719093	1312.16324162325	1094.50545221335	795.669285976355	1124.2811578186	941.040479599815	AP1M1	ENSGALG00000003959
6.25510315380533	0	0	5.98998207761372	0	0	LEUTX	ENSGALG00000003965
10391.5135108003	10379.613871975	8760.74914415657	9818.57895555515	9549.04845330067	7769.56717439685	RPL23A	ENSGALG00000003966
3316.09825768165	3051.73449428666	2317.94232915003	2867.20475448443	3315.16113793338	3012.66977548384	EMC1	ENSGALG00000003969
9.82944781312266	5.16193250048487	0	0	0	17.2316669713089	FAXDC2	ENSGALG00000003972
238.587506009432	505.869385047517	160.929004581671	310.480737689644	378.605874974359	235.499448607889	TLCD1	ENSGALG00000003973
67.9125485270293	139.372177513092	160.929004581671	86.8547401253989	138.437605253782	61.2681492313206	BCORL1	ENSGALG00000003976
1964.9959764597	1761.25136916544	1984.79105650727	2177.35848521259	1404.30267753647	1845.70299559353	TWF2	ENSGALG00000003977
176.930060636208	157.955134514837	139.283582912791	178.701131982143	50.3409473650118	139.76796543395	NEK8	ENSGALG00000003979
0	12.3886380011637	0	4.99165173134476	0	3.82925932695754	IQCA1	ENSGALG00000003980
541.513215886576	895.079095584077	473.375960845499	688.847938925577	379.654644711131	530.352416783619	TARSL2	ENSGALG00000003985
294.88343439368	686.537022564488	367.031063081004	435.272030973263	362.874328922793	343.676024594439	PITHD1	ENSGALG00000003986
98.2944781312266	14.4534110013576	120.461477113765	265.555872107541	71.3163421004334	81.3717606978477	TRAF4	ENSGALG00000003987
101.868822790544	148.663656013964	169.398952191232	95.8397132418195	238.070730247035	79.4571310343689	NA	ENSGALG00000003990
270.756607943288	239.513668022498	330.327956772903	315.472389420989	297.850605242986	332.188246613567	MRTO4	ENSGALG00000003991
495.04673531545	352.043796533068	460.200486786181	664.888010615122	298.899374979758	858.711404070228	ERAL1	ENSGALG00000003995
110.804684438837	48.5221655045578	263.509481186362	203.659390638866	36.7069407869878	89.9875941835022	NAV2	ENSGALG00000003999
2963.13172257407	2318.7400792178	2250.18274827354	1756.06307908709	1670.69019067633	2477.53078454153	LYPLA2	ENSGALG00000004002
4523.33316636608	5058.69385047517	3790.7721079238	4861.8687863298	3373.89224319256	4826.78138162998	AIFM1	ENSGALG00000004003
280.586055756411	363.400048034135	222.100848428505	147.752891247805	524.384868385539	357.078432238791	PHKB	ENSGALG00000004004
2062.3968684261	2068.90254619434	2795.08271115533	2246.24327910514	1697.95820383238	2283.19587369843	AKR7A2	ENSGALG00000004005
58.0831007139066	116.659674510958	22.586526958831	84.858079432861	1.04876973677108	34.4633339426179	DHRS13	ENSGALG00000004009
483.430115172669	381.983005035881	207.984269079235	297.502443188148	156.266690778891	420.26121113359	TOR1AIP2	ENSGALG00000004017
155.483992680304	238.481281522401	91.2872131252752	102.828025665702	203.461328933589	120.621668799162	NA	ENSGALG00000004018
760.441826269762	1003.47967809426	510.0790671536	535.105065600159	779.235914420912	870.199182051101	MARS2	ENSGALG00000004019
33023.3703074328	65279.8631741319	10911.1747316953	24339.2938420371	50848.551917609	63136.8277828759	MATN4	ENSGALG00000004028
5.361516988976	0	5.64663173970775	3.99332138507581	0	0	GALNT10	ENSGALG00000004033
5933.41213446677	6065.27068806972	7250.27515378475	5043.56490935075	6160.47343379332	6174.68066471903	CAPZB	ENSGALG00000004034
0.893586164829333	40.263073503782	84.6994760956162	0	0	16.2743521395695	CRYBA1	ENSGALG00000004035
716.656104193125	463.541538543541	593.837437959265	903.488963373402	694.285565742454	432.706303946202	DNA2	ENSGALG00000004037
156.377578845133	152.793202014352	287.978218725095	341.428978423982	130.047447359614	281.450560531379	ADAL	ENSGALG00000004038
1676.36764521983	1595.03714264983	2409.22954227531	1775.0313556662	2157.31934853811	2133.85475994709	MINOS1	ENSGALG00000004039
1178.64015140989	1141.81946910725	307.741429814072	856.567437098761	1381.22974332751	248.90185625224	MFAP3	ENSGALG00000004040
10.723033977952	46.4573925043638	39.5264221779542	33.9432317731444	22.0241644721927	8.61583348565446	NUFIP2	ENSGALG00000004042
5.361516988976	0	0	0	0	0	CSRP3	ENSGALG00000004044
92.0393749774213	12.3886380011637	73.4062126162007	69.8831242388267	3.14630921031324	93.8168535104597	AGAP1	ENSGALG00000004045
17.8717232965867	4.1295460003879	92.2283184152265	0	75.5114210475177	4.78657415869692	LARP6	ENSGALG00000004046
4652.90316026634	8466.60168729529	2768.7317630367	3779.67869097426	5348.7256575325	5034.51870011742	GALE	ENSGALG00000004047
856.94913207133	665.889292562548	850.759182115967	957.398802071926	1077.0865196639	477.700101037953	PTPRS	ENSGALG00000004048
1503.90551540777	1384.43029663004	1208.37919229746	1150.07655890183	1117.98853939797	1647.53882542348	ITFG1	ENSGALG00000004049
790.823755873959	1361.71779362791	709.593388623274	1311.8060749974	1122.18361834505	1101.86937133203	GPR107	ENSGALG00000004052
170.674957482403	225.06025702114	237.158533067725	195.672747868715	125.852368412529	273.792041877464	C14H7orf50	ENSGALG00000004055
1801.46970829593	2034.83379169114	1627.17104632578	1917.79259518266	1816.46918408751	1986.42827585922	HMGCL	ENSGALG00000004057
359.221638261392	132.145472012413	171.281162771135	715.802858274839	531.726256542937	612.681492313206	GPR146	ENSGALG00000004058
83.1035133291279	64.0079630060124	51.760790947321	172.711149904529	77.6089605210598	150.298428583083	LRRC49	ENSGALG00000004059
1739.81226292271	1806.67637516971	1943.38242374942	2016.62729946328	2101.73455248924	2031.42207295097	SLC25A14	ENSGALG00000004063
0	114.594901510764	5.64663173970775	18.9682765791101	0	0	GPER1	ENSGALG00000004064
37.530618922832	48.5221655045578	31.9975798583439	46.9215262746408	42.9995592076142	83.2863903613265	SLC25A16	ENSGALG00000004065
1.78717232965867	6.19431900058185	37.6442115980516	0	0	1.91462966347877	HTR6	ENSGALG00000004066
785.462238884984	1167.62913160968	735.003231451958	860.560758483837	809.650236787273	770.638439550205	FAM114A2	ENSGALG00000004068
297.564192888168	200.282981018813	94.1105289951291	140.764578823922	141.583914464096	101.475372164375	MICALL2	ENSGALG00000004070
83.9970994939573	11.3562515010667	47.9963697875159	25.9565890029928	250.655967088288	102.432686996114	NETO2	ENSGALG00000004071
0	0	40.4675274679055	1.99666069253791	0	0	KCNS1	ENSGALG00000004074
2.680758494488	18.5829570017455	0	46.9215262746408	0	0	LOC416263	ENSGALG00000004078
1477.09793046289	2348.67928772062	1981.02663534747	1946.74417522446	1709.49467093686	1816.02623580961	ENOX2	ENSGALG00000004079
61.657445373224	22.7125030021334	197.632110889771	78.8680973552473	11.5364671044819	170.40204004961	TMCO4	ENSGALG00000004081
300.244951382656	355.140956033359	852.64139269587	504.156824865821	810.699006524044	216.353151973101	TAOK1	ENSGALG00000004082
0	0	18.8221057990258	0	0	0	GRIA1	ENSGALG00000004083
1022.26257256476	1521.73770114294	684.183545794589	803.655928746507	1175.67087492038	1054.00362974506	ZDHHC13	ENSGALG00000004085
193.908197767965	297.327312027929	22.586526958831	167.719498173184	7.34138815739755	43.0791674282723	THSD4	ENSGALG00000004087
353.860121272416	331.396066531129	233.39411190792	410.31377231654	356.581710502167	264.21889356007	FNBP1	ENSGALG00000004088
50.0408252304426	13.4210245012607	42.3497380478081	10.9816338089585	11.5364671044819	56.4815750726237	TBX22	ENSGALG00000004093
3.57434465931733	30.9715950029092	14.1165793492694	24.9582586567238	0	24.890185625224	CHRNA7	ENSGALG00000004096
92.0393749774213	189.959116017843	172.222268061086	30.9482407343375	44.0483289443853	169.444725217871	LRRC38	ENSGALG00000004097
511.131286282378	386.112551036268	158.105688711817	764.721045242018	481.385309177925	284.322505026597	STK4	ENSGALG00000004098
12.5102063076107	0	47.0552644975646	1.99666069253791	0	1.91462966347877	C1orf158	ENSGALG00000004102
0	0	0	55.9064993910614	19.9266249986505	0	FAM81A	ENSGALG00000004103
278.798883426752	216.801165020365	409.380801128812	313.475728728451	397.483730236239	390.584451349669	INTS1	ENSGALG00000004104
722.91120734693	885.787617083204	939.223079371389	1123.12163955257	1551.13044068443	1258.86900373729	DHCR7	ENSGALG00000004106
12754.1553306091	17135.5511286096	11958.6249194111	12003.9240835379	13287.9125648896	15268.2142514114	ITM2A	ENSGALG00000004107
4965.6583179566	6444.15653360531	6376.92944470995	6091.81177293315	5099.11846018099	7668.09180223247	NA	ENSGALG00000004108
292.202675899192	268.420490025213	259.745060026556	235.605961719473	205.558868407131	381.011303032275	TOMM34	ENSGALG00000004110
541.513215886576	896.111482084174	637.128281297024	460.230289629987	552.701651278359	816.589551473695	FUCA1	ENSGALG00000004112
493.259562985792	671.051225063033	156.223478131914	24.9582586567238	18.8778552618794	297.724912670949	LOC422147	ENSGALG00000004113
4230.23690430206	4433.06763141641	4602.00486786181	4006.29967957731	4352.39440759998	5171.41472105616	DNAJA2	ENSGALG00000004115
0	0	0	0	2.09753947354216	0	TRPM8	ENSGALG00000004116
2241.11410139197	2404.42815872585	2026.19968926513	2643.57875692019	1785.00609198438	2085.98901836012	LPAR4	ENSGALG00000004121
1275.14745721146	1326.61665262461	1570.7047289287	1269.87620045411	1799.68886829917	1513.51474897997	PNRC2	ENSGALG00000004122
68.8061346918586	41.295460003879	70.5828967463468	34.9415621194133	99.6331249932525	126.365557789599	PABPC1L	ENSGALG00000004123
141.186614043035	256.03185202405	64.9362650066391	61.8964814686751	25.1704736825059	62.22546406306	LOC422150	ENSGALG00000004127
56.295928384248	21.6801165020365	77.1706337760059	114.80798982093	3.14630921031324	48.8230564187086	CYSLTR1	ENSGALG00000004128
5543.80856660118	6771.42305413605	6133.18317461256	6609.94522264674	7203.99932188054	5982.26038353942	SRSF10	ENSGALG00000004133
536.1516988976	58.8460305055275	36.7031063081004	122.794632591081	41.9507894708432	128.280187453078	SH3BP4	ENSGALG00000004140
15161.4764586593	13749.3234082915	14758.4131570161	16031.1887003868	12664.9433412476	14530.1245161404	YWHAB	ENSGALG00000004143
407.475291162176	321.072201530159	306.800324524121	206.654381677673	176.193315777541	202.95074432875	DDX21	ENSGALG00000004144
44.6793082414666	0	0	10.9816338089585	0	2.87194449521815	RIMS4	ENSGALG00000004146
125.995649240936	122.85399351154	31.9975798583439	44.9248655821029	8.39015789416863	112.963150145247	MYO1E	ENSGALG00000004150
1018.68822790544	1285.32119262073	1200.85034997785	1055.23517600628	1303.62078280645	1924.20281179616	C17H9orf78	ENSGALG00000004152
482.53652900784	601.881329556536	396.205327069494	468.216932400139	299.948144716529	438.450192936638	NADSYN1	ENSGALG00000004153
145.654544867181	27.8744355026183	14.1165793492694	31.9465710806065	0	16.2743521395695	NA	ENSGALG00000004154
16.9781371317573	12.3886380011637	0.941105289951291	18.9682765791101	6.29261842062647	8.61583348565446	MYOM3	ENSGALG00000004155
2304.55871909485	2979.46743927987	2269.00485407256	1495.49885871089	2525.43752614476	2444.98208026239	KIF1BP	ENSGALG00000004156
8019.04224317843	6836.46340364216	8450.18439847264	6518.09883078999	7104.36619688729	8969.0826585663	G3BP1	ENSGALG00000004160
4600.18157654141	2479.79237323293	3243.9899344621	3484.17290847864	2553.75430903758	3690.44867635533	CCNB1	ENSGALG00000004161
8.042275483464	12.3886380011637	1.88221057990258	6.98831242388267	3.14630921031324	19.1462966347877	SLC16A6	ENSGALG00000004162
207.311990240405	176.538091516583	202.337637339528	126.787953976157	79.706499994602	178.060558703526	TOR1A	ENSGALG00000004165
1404.71745111171	926.050690586986	1104.85761040282	1094.17005951077	864.186263099369	1499.15502650388	VPS51	ENSGALG00000004166
12.5102063076107	27.8744355026183	9.41105289951291	29.9499103880686	8.39015789416863	18.1889818030483	SRGN	ENSGALG00000004167
622.829556886045	513.096090548196	395.264221779542	720.794510006184	546.409032857732	368.566210219663	FEM1A	ENSGALG00000004168
268.0758494488	398.501189037432	243.746270097384	107.819677397047	222.339184195469	241.243337598325	LOC422151	ENSGALG00000004169
871.2465107086	1299.77460362209	255.0395335768	508.150146250897	2066.07638143903	1784.43484636221	ADA	ENSGALG00000004170
260.927160130165	38.1983005035881	167.51674161133	149.749551940343	59.7798749959515	61.2681492313206	RNF111	ENSGALG00000004171
2022.18549100878	1540.32065814469	2098.66479659138	1633.26844649601	1360.25434859209	1422.56983996473	BET1L	ENSGALG00000004172
0	0	0	0	0	21.0609262982665	NA	ENSGALG00000004173
1068.72905313588	1181.05015611094	751.00202138113	733.77280450768	995.282480195754	1153.56437224596	VPS26A	ENSGALG00000004174
1576.28599475894	1610.52294015128	1588.58572943778	1640.25675891989	1702.15328277946	1490.53919301822	ATOX1	ENSGALG00000004176
1300.16786982668	990.058653592998	837.583708056649	1291.83946807202	1221.81674333831	1666.68512205827	ANAPC5	ENSGALG00000004179
705.039484050344	629.755765059154	226.806374878261	586.019913259875	318.825999978408	393.456395844887	NA	ENSGALG00000004180
45898.1597702939	42221.510694466	31731.2470612877	29271.0457526057	29457.8443664261	37260.6078809603	SPARC	ENSGALG00000004184
1238.51042445346	1435.01723513479	1383.4247762284	1541.42205463926	1283.6941578078	1678.17290003914	NSRP1	ENSGALG00000004186
1207.23490868443	1485.60417363955	2412.05285814516	1230.94131694962	1472.47271042659	2169.27540872145	NA	ENSGALG00000004187
32.169101933856	21.6801165020365	12.2343687693668	48.9181869671787	20.9753947354216	22.0182411300059	MAFK	ENSGALG00000004189
740.782930643517	731.962028568755	1060.62566177511	1429.60905585714	1103.30576308318	1126.75955695726	RNF34	ENSGALG00000004190
1358.25097054059	1410.23995913247	1076.62445170428	1524.45043875269	1179.86595386746	1186.1130765251	RIC8A	ENSGALG00000004191
1041.921468191	1130.46321760619	1537.76604378041	1150.07655890183	1020.45295387826	1348.85659792079	NA	ENSGALG00000004192
39.3177912524906	37.1659140034911	27.2920534085874	55.9064993910614	1.04876973677108	69.8839827169751	ARSG	ENSGALG00000004193
1380.59062466132	919.856371586404	2316.06011857013	1874.86439029309	1393.81498016876	1318.22252330513	KIF4B	ENSGALG00000004195
638.020521688144	297.327312027929	642.774913036732	658.898028537509	547.457802594503	498.76102733622	SUPV3L1	ENSGALG00000004197
2208.05141329328	2476.69521373264	3179.99477474541	3360.37994554129	2600.94894719228	4187.29507402807	PDZD11	ENSGALG00000004198
10.723033977952	0	0	0	0	24.890185625224	TMEM184A	ENSGALG00000004199
403.900946502858	486.254041545675	557.134331651164	465.221941361332	702.675723636623	400.157599667063	DPP9	ENSGALG00000004200
849.800442752696	1011.73877009503	1081.32997815403	1328.77769088398	1130.57377623922	1094.21085267812	PSMG3	ENSGALG00000004203
109.911098274008	329.331293530935	76.2295284860546	155.739534017957	112.218361834505	149.341113751344	FAM63B	ENSGALG00000004204
121.527718416789	126.983539511928	96.933844864983	69.8831242388267	97.5355855197104	72.7559272121932	SOAT1	ENSGALG00000004205
12.5102063076107	1.03238650009697	20.7043163789284	234.607631373204	326.167388135806	273.792041877464	ELFN1	ENSGALG00000004209
645.169211006778	619.431900058185	914.754341832655	989.345373152532	726.797427582358	484.401304860129	ADAM10	ENSGALG00000004212
315.435916184754	314.877882529577	367.031063081004	369.382228119512	81.8040394681442	482.48667519665	WIPI1	ENSGALG00000004215
25.0204126152213	55.7488710052366	21.6454216688797	0	26.219243419277	62.22546406306	TOR3A	ENSGALG00000004216
1095.53663808076	1703.43772516001	540.194436432041	908.480615104747	511.799631544287	1071.23529671637	SERINC3	ENSGALG00000004220
20.5524817910747	0	0	0	0	0	NA	ENSGALG00000004221
3613.66245056982	3550.37717383349	3323.98388410796	3409.29813250847	2292.61064458158	4396.94702217899	HK1	ENSGALG00000004222
504.876183128573	729.897255568561	1095.4465575033	479.198566209097	615.627835484623	1109.52788998595	MAD1L1	ENSGALG00000004224
651.424314160584	405.727894538111	293.624850464803	518.133449713586	376.508335500817	490.145193850565	NA	ENSGALG00000004225
635.339763193656	990.058653592998	499.726908964136	733.77280450768	633.456921009732	833.821218445004	FAM20B	ENSGALG00000004227
35.7434465931733	69.1698955064973	5.64663173970775	35.9398924656823	11.5364671044819	1.91462966347877	USP40	ENSGALG00000004228
5.361516988976	1.03238650009697	0	3.99332138507581	0	0	LIPC	ENSGALG00000004230
22.3396541207333	82.5909200077579	0	0	54.5360263120961	89.9875941835022	NA	ENSGALG00000004231
532.577354238282	307.651177028898	527.960067662674	336.437326692637	227.583032879324	706.498345823666	PGGHG	ENSGALG00000004234
814.056996159522	652.468268061288	1208.37919229746	907.482284758478	999.477559142838	1009.96714748505	TRAF3IP1	ENSGALG00000004236
5574.19049620538	5236.26432849185	6040.95485619734	5103.46473012689	5262.72653911727	6673.44169205525	PRKAR1A	ENSGALG00000004237
641.594866347461	492.448360546257	814.997181097818	781.69266112859	722.602348635273	716.07149414106	MRM2	ENSGALG00000004238
96.5073058015679	16.5181840015516	343.503430832221	123.79296293735	99.6331249932525	24.890185625224	IFITM5	ENSGALG00000004239
147.44171719684	167.24661301571	257.862849446654	233.609301026935	197.168710512963	142.639909929168	ORAI1	ENSGALG00000004240
146.548131032011	30.9715950029092	279.508271115533	72.8781152776335	53.487256575325	224.011670627016	TTPAL	ENSGALG00000004244
658.573003479218	907.46773358524	1013.57039727754	748.747759701714	759.309289422261	793.61399551195	NUDT1	ENSGALG00000004245
14.2973786372693	6.19431900058185	0	0	0	0	SLC6A4	ENSGALG00000004246
31.2755157690266	14.4534110013576	21.6454216688797	32.9449014268754	8.39015789416863	44.9937970917511	MORN3	ENSGALG00000004247
11.6166201427813	9.29147850087277	0	0	0	0	TACR2	ENSGALG00000004248
119.740546087131	187.894343017649	87.5227919654701	195.672747868715	120.608519728674	114.877779808726	GRHL3	ENSGALG00000004249
476.281425854034	482.124495545287	320.91690387339	532.110074561352	353.435401291854	386.755192022711	B4GALNT4	ENSGALG00000004250
32.169101933856	0	0	27.9532496955307	63.9749539430358	13.4024076443514	LOC420160	ENSGALG00000004252
323.478191668218	384.047778036074	367.031063081004	235.605961719473	264.289973666312	304.426116493124	TMEM120B	ENSGALG00000004254
34.849860428344	9.29147850087277	0	0	0	11.4877779808726	SNX8	ENSGALG00000004255
686.274174588928	1342.10245012607	151.517951682158	257.56922933739	11.5364671044819	193.377596011356	TSPAN15	ENSGALG00000004257
4170.3666312585	4312.27841090506	4935.15614050457	5000.63670446118	4426.85705891072	4556.81859907947	BLMH	ENSGALG00000004259
7.14868931863466	0	0	0	0	0	NA	ENSGALG00000004260
0	5.16193250048487	4.70552644975646	0	0	23.9328707934846	AQP9	ENSGALG00000004261
3912.12022962282	5240.39387449224	3908.41026916771	4002.30635819223	4286.3219141834	4635.3184152821	MYDGF	ENSGALG00000004263
2118.69279681035	1239.89618661647	2793.20050057543	2715.45854185155	2693.24068402813	3166.79746339389	TNFAIP8L1	ENSGALG00000004266
384.242050876613	158.987521014934	154.341267552012	162.727846441839	323.021078925492	210.609262982665	NIPAL3	ENSGALG00000004268
964.17947185085	819.714881076998	756.648653120838	358.400594310554	886.210427571562	1704.02040049611	ALDH1A2	ENSGALG00000004270
50.0408252304426	0	30.1153692784413	54.9081690447924	27.2680131560481	2.87194449521815	ASB1	ENSGALG00000004272
257.352815470848	292.165379527444	328.445746193001	397.335477815043	206.607638143903	112.963150145247	RALGPS2	ENSGALG00000004273
752.399550786298	65.0403495061094	1245.08229860556	838.59749086592	199.266249986505	197.206855338313	TWIST2	ENSGALG00000004274
349.392190448269	533.743820550136	179.751110380697	235.605961719473	201.363789460047	302.511486829646	CHST12	ENSGALG00000004276
492.365976820962	657.630200561773	342.56232554227	675.869644424081	480.336539441154	301.554171997906	RCAN3	ENSGALG00000004282
0	5.16193250048487	0	0	0	0	HNF4A	ENSGALG00000004285
35.7434465931733	0	0.941105289951291	64.8914725074819	28.3167828928191	10.5304631491332	COL13A1	ENSGALG00000004286
805.121134511229	371.659140034911	703.946756883566	1112.14000574361	597.798749959515	745.748253924981	HDAC4	ENSGALG00000004288
1083.02643177315	3144.64927929538	1239.43566686585	1750.07309700947	3319.35621688047	5398.29833617839	ANGPTL1	ENSGALG00000004290
572.788731655602	570.909734553627	299.271482204511	310.480737689644	554.799190751901	391.541766181408	CGNL1	ENSGALG00000004294
179.610819130696	190.99150251794	208.925374369187	119.799641552274	23.0729342089637	178.060558703526	CPD	ENSGALG00000004295
20.5524817910747	0	0	1.99666069253791	0	0	DNAH1	ENSGALG00000004297
179.610819130696	157.955134514837	183.515531540502	107.819677397047	75.5114210475177	93.8168535104597	PTDSS2	ENSGALG00000004300
6618.79272289087	6828.20431164139	5209.0177798804	6828.57956847964	6659.68782849635	5622.31000680541	NDUFA10	ENSGALG00000004302
20062.7965727482	16999.2761105968	18135.0989373614	12588.9456664515	11585.7592821101	16011.0905608412	TCF12	ENSGALG00000004304
207.311990240405	234.351735522013	231.511901328018	293.509121803072	16.7803157883373	16.2743521395695	SYT12	ENSGALG00000004306
222.502955042504	283.906287526668	224.924164298359	381.36219227474	556.896730225443	502.590286663177	GDAP1L1	ENSGALG00000004309
7945.76817766243	5298.20751849767	11188.8007922309	9201.61080156094	6088.10832195611	9881.40369321393	TTYH3	ENSGALG00000004310
82.2099271642986	75.3642145070791	36.7031063081004	125.789623629888	53.487256575325	43.0791674282723	AGGF1	ENSGALG00000004311
158.164751174792	339.655158531905	11.2932634794155	96.8380435880884	74.4626513107466	195.292225674834	NUDT13	ENSGALG00000004319
826.567202467133	829.00635957787	768.883021890205	665.886340961391	934.453835463031	684.48010469366	OSER1	ENSGALG00000004321
132.250752394741	48.5221655045578	263.509481186362	221.629336871707	74.4626513107466	90.9449090152416	SYNGAP1	ENSGALG00000004323
240.374678339091	140.404564013189	249.392901837092	134.774596746309	314.630921031324	245.072596925283	SETD1A	ENSGALG00000004324
1785.38515732901	2901.0060652725	1622.46551987603	1646.2467409975	2535.92522351247	2712.07291831768	P4HA1	ENSGALG00000004325
440.537979260861	532.711434050039	522.313435922967	531.111744215083	513.897171017829	549.498713418407	GOSR1	ENSGALG00000004326
1089.28153492696	760.86885057147	1565.058097189	960.393793110732	1074.98898019036	796.485940007168	IGHMBP2	ENSGALG00000004328
363.689569085538	678.277930563712	430.08511750774	419.29874543296	710.01711179402	494.931768009262	IQCE	ENSGALG00000004329
0	0	0	8.98497311642057	3.14630921031324	5.74388899043631	PLA2G12B	ENSGALG00000004332
79.5291686698106	4.1295460003879	123.284792983619	143.759569862729	41.9507894708432	73.7132420439326	ABCA5	ENSGALG00000004333
37.530618922832	8.25909200077579	27.2920534085874	8.98497311642057	0	17.2316669713089	MYLK3	ENSGALG00000004334
12.5102063076107	0	0	0	0	0	PDE8B	ENSGALG00000004339
35.7434465931733	149.696042514061	192.926584440015	107.819677397047	32.5118618399034	95.7314831739385	LOC424430	ENSGALG00000004341
717.549690357954	612.205194557506	1747.63252343955	1257.89623629888	647.090927587756	1143.03390909683	ORC6	ENSGALG00000004342
1.78717232965867	0	0	0	17.8290855251083	7.65851865391508	HPD	ENSGALG00000004343
0	0	8.46994760956162	102.828025665702	0	100.518057332635	OIT3	ENSGALG00000004345
4.46793082414666	0	0	0	0	0	P2RY4	ENSGALG00000004346
124.208476911277	21.6801165020365	24.4687375387336	110.814668435854	79.706499994602	25.8475004569634	NEDD4	ENSGALG00000004347
23.2332402855627	25.8096625024244	43.2908433377594	9.98330346268953	10.4876973677108	8.61583348565446	BRAT1	ENSGALG00000004348
94.7201334719093	173.440932016292	46.1141592076133	205.656051331404	202.412559196818	17.2316669713089	WDR41	ENSGALG00000004350
1527.13875569333	1608.45816715109	2020.55305752542	1573.36862571987	1739.90899330322	1746.14225309264	PSMD9	ENSGALG00000004352
2167.84003587596	1713.76159016098	819.702707547575	1590.34024160644	1084.4279078213	1009.96714748505	TBCA	ENSGALG00000004353
481.64294284301	655.565427561579	508.196856573697	735.769465200218	927.112447305634	1121.97298279856	MCU	ENSGALG00000004355
6546.41224353969	7445.57143869938	5787.79753320044	3950.39318018625	4775.04861151872	7249.74522076236	ANXA6	ENSGALG00000004357
0.893586164829333	14.4534110013576	0.941105289951291	0	0	0	LACAAT2L	ENSGALG00000004360
857.842718236159	1289.45073862112	1027.68697662681	1084.18675604808	1267.96261175623	1212.9178918138	MRPL21	ENSGALG00000004362
251.097712317043	177.57047801668	273.861639375826	134.774596746309	303.094453926842	155.08500274178	NA	ENSGALG00000004363
1284.97690502458	1254.34959761782	529.842278242577	724.78783139126	674.358940743804	423.133155628808	ABR	ENSGALG00000004364
26.80758494488	10.3238650009697	0	44.9248655821029	0	6.70120382217569	NA	ENSGALG00000004365
1397.56876179308	1541.35304464478	1132.1496638114	1730.10649008409	1453.59485516472	955.400202075906	BAP1	ENSGALG00000004366
0	0	0	38.9348835044892	6.29261842062647	0	AWAT1	ENSGALG00000004367
425.347014458762	759.836464071373	93.1694237051778	295.50578249561	324.069848662263	438.450192936638	PYGO1	ENSGALG00000004369
200.163300921771	160.019907515031	316.211377423634	300.497434226955	140.535144727325	297.724912670949	MAP2K6	ENSGALG00000004370
1451.18393168284	1718.92352266146	2375.34975183706	1943.74918418565	2375.46345378649	3161.05357440345	MICU1	ENSGALG00000004372
2002.52659538253	1553.74168264595	996.630502058417	2090.50374508719	1120.08607887151	1575.74021304303	VPS35	ENSGALG00000004375
270.756607943288	496.577906546645	321.858009163342	260.564220376197	80.7552697313731	392.499081013148	KCNJ2	ENSGALG00000004376
652.317900325413	411.922213538693	891.226709583873	813.639232209196	942.8439933572	428.877044619244	ASB6	ENSGALG00000004378
109.017512109179	248.805146523371	191.985479150063	160.731185749301	200.315019723276	184.761762525701	NA	ENSGALG00000004379
1309.10373147497	1413.33711863276	1779.63010329789	1506.48049251985	1349.76665122438	1385.23456152689	TIMM22	ENSGALG00000004383
5400.83478022849	12879.0215887098	5013.26787957053	4541.40474517747	8036.72249287678	10459.6218515845	SOX9	ENSGALG00000004386
1282.29614653009	1084.00582510182	600.425174988924	614.971493301675	1370.7420459598	846.266311257616	CCPG1	ENSGALG00000004387
870.35292454377	545.100072051202	252.216217706946	840.594151558458	676.456480217346	427.919729787505	AP3B1	ENSGALG00000004390
22.3396541207333	59.8784170056245	35.7620010181491	0	0	0	LOC428824	ENSGALG00000004393
31.2755157690266	4.1295460003879	24.4687375387336	0	10.4876973677108	12.445092812612	PCBP3	ENSGALG00000004394
14.2973786372693	10.3238650009697	19.7632110889771	0	2.09753947354216	0.957314831739385	MLXIP	ENSGALG00000004397
21.446067955904	0	20.7043163789284	0	5.2438486838554	0	CARD11	ENSGALG00000004398
128.676407735424	67.1051225063033	313.38806155378	55.9064993910614	78.6577302578309	201.99342949701	SPECC1	ENSGALG00000004400
0	0	11.2932634794155	0	0	0	WNT11B	ENSGALG00000004401
3694.97879156929	3710.39708134853	4795.87255759178	3805.63527997725	4023.08071025386	3846.49099392885	ANAPC16	ENSGALG00000004410
1663.85743891222	2535.54124423817	1939.61800258961	1944.74751453192	2054.53991433454	2859.49940240554	DIABLO	ENSGALG00000004412
427.134186788421	395.404029537141	320.91690387339	486.18687863298	584.164743381491	686.394734357139	SLC39A11	ENSGALG00000004413
111.698270603667	96.0119445090186	160.929004581671	154.741203671688	51.3897171017829	75.6278717074114	TTC19	ENSGALG00000004416
5.361516988976	57.8136440054306	0	12.9782945014964	2.09753947354216	13.4024076443514	SSTR2	ENSGALG00000004418
412.836808151152	385.080164536171	460.200486786181	840.594151558458	1166.23194728944	790.742051016732	SDK1	ENSGALG00000004420
0	0	0	8.98497311642057	0	0	SEC16B	ENSGALG00000004424
115.272615262984	161.052294015128	37.6442115980516	198.667738907522	122.706059202216	67.0120382217569	SCAMP1	ENSGALG00000004425
13.40379247244	28.9068220027153	17.8810005090745	0	75.5114210475177	0	LOC427545	ENSGALG00000004428
6345.35535645309	6363.63038659775	6211.29491367852	6323.42441326755	6750.93079559544	6911.81308515836	SAR1A	ENSGALG00000004431
390.497154030418	397.468802537335	329.386851482952	492.176860710594	524.384868385539	347.505283921397	RAB27A	ENSGALG00000004435
0	0	114.814845374058	0	0	8.61583348565446	CYP3A4	ENSGALG00000004436
113.485442933325	254.999465523953	6.58773702965904	95.8397132418195	196.119940776192	51.6950009139268	LHFPL2	ENSGALG00000004437
482.53652900784	380.950618535784	85.6405813855675	267.552532800079	202.412559196818	139.76796543395	ARSB	ENSGALG00000004438
1323.40111011224	944.633647588732	964.632922200073	1198.99474586901	1127.42746702891	1151.64974258248	VPS33A	ENSGALG00000004440
2.680758494488	7.22670550067882	0	2.99499103880686	8.39015789416863	7.65851865391508	CPSF4L	ENSGALG00000004441
3942.50215922702	5198.06602798827	4843.8689273793	4451.55501401326	4785.53630888643	5020.15897764133	PPA1	ENSGALG00000004442
379.774120052466	29.9392085028123	295.507061044705	359.398924656823	326.167388135806	180.932503198744	SHCBP1	ENSGALG00000004444
25.0204126152213	8.25909200077579	12.2343687693668	28.9515800417996	44.0483289443853	17.2316669713089	NA	ENSGALG00000004445
13.40379247244	0	0	0	0	0	BRINP2	ENSGALG00000004448
267.18226328397	126.983539511928	293.624850464803	189.682765791101	230.729342089637	345.590654257918	USP34	ENSGALG00000004455
14.2973786372693	16.5181840015516	0.941105289951291	64.8914725074819	9.43892763093971	0	FOXK1	ENSGALG00000004460
757.761067775274	946.698420588926	1446.47883065513	1157.06487132572	1193.49996044549	1199.51548416945	PALD1	ENSGALG00000004465
406.581704997346	801.131924075252	670.066966445319	729.779483122604	542.213953910648	755.321402242375	CLIP1	ENSGALG00000004467
86.6778579884453	213.704005520074	305.85921923417	110.814668435854	116.41344078159	53.6096305774056	TP53RK	ENSGALG00000004469
0	6.19431900058185	0	119.799641552274	0	0	ASTN1	ENSGALG00000004472
230.545230525968	98.0767175092126	154.341267552012	360.397255003092	266.387513139854	236.456763439628	PLEKHF1	ENSGALG00000004474
160.84550966928	0	115.755950664009	0	91.2429670990839	44.0364822600117	SEMA3G	ENSGALG00000004476
1578.0731670886	2019.34799418968	2199.36306261617	1492.50386767208	1858.41997355835	2271.70809571756	NA	ENSGALG00000004477
892.692578664503	648.3387220609	1061.56676706506	808.647580477852	936.551374936574	1000.39399916766	C11H19orf12	ENSGALG00000004480
635.339763193656	775.322261572828	931.694237051778	708.814545850956	1435.76576963961	1127.716871789	AHSA2	ENSGALG00000004483
243.055436833579	372.691526535008	415.968538158471	503.158494519552	357.630480238938	179.975188367004	ZCCHC8	ENSGALG00000004486
249.310539987384	258.096625024244	393.38201119964	307.485746650837	357.630480238938	243.157967261804	NA	ENSGALG00000004489
32.169101933856	0	0	34.9415621194133	0	17.2316669713089	DMGDH	ENSGALG00000004491
129.569993900253	169.311386015904	156.223478131914	204.657720985135	70.2675723636623	195.292225674834	PIGL	ENSGALG00000004492
1967.67673495419	2444.69123222964	2806.37597463475	2090.50374508719	2448.87733536047	4174.84998121546	RSRC2	ENSGALG00000004493
21.446067955904	22.7125030021334	104.462687184593	0	17.8290855251083	51.6950009139268	CCNE1	ENSGALG00000004494
21.446067955904	74.3318280069821	20.7043163789284	25.9565890029928	96.4868157829393	0.957314831739385	DNAI2	ENSGALG00000004495
161.739095834109	222.995484020946	185.397742120404	229.615979641859	195.071171039421	168.487410386132	TNIP1	ENSGALG00000004496
1012.43312475163	1042.71036509794	643.716018326683	906.483954412209	1080.23282887421	704.583716160187	SLC2A10	ENSGALG00000004498
72.380479351176	103.238650009697	256.921744156703	135.772927092578	61.8774144694937	92.8595386787203	RFWD2	ENSGALG00000004500
335.988397975829	319.007428529965	253.157322996897	217.636015486632	156.266690778891	240.286022766586	CENPV	ENSGALG00000004503
0.893586164829333	0	0	0	28.3167828928191	0	RADIL	ENSGALG00000004504
350.285776613098	635.950084059736	786.764022399279	457.23529859118	654.432315745153	599.279084668855	CCDC137	ENSGALG00000004505
190.333853108648	171.376159016098	334.092377932708	437.268691665801	274.777671034023	177.103243871786	URI1	ENSGALG00000004506
596.915558105994	472.833017044414	554.311015781311	407.318781277733	213.9490263013	190.505651516138	EYA2	ENSGALG00000004508
40485.7083699226	58537.3469419985	65901.8390341291	39088.6263778146	41854.3026550602	53397.1066847594	LOC101747587	ENSGALG00000004509
35.7434465931733	23.7448895022304	8.46994760956162	51.9131780059855	19.9266249986505	2.87194449521815	PDE6G	ENSGALG00000004514
120.63413225196	17.5505705016486	44.2319486277107	195.672747868715	192.973631565879	184.761762525701	NA	ENSGALG00000004515
288.628331239875	440.829035541408	433.849538667545	507.151815904628	115.364671044819	171.35935488135	PARP3	ENSGALG00000004517
1981.97411359146	151.760815514255	230.570796038066	610.978171916599	173.047006567228	90.9449090152416	BHMT2	ENSGALG00000004518
14.2973786372693	0	0	0	14.6827763147951	0	TRPV2	ENSGALG00000004519
832.822305620938	1165.56435860948	1888.79831693224	952.407150340581	692.188026268912	561.943806231019	GPX3	ENSGALG00000004521
68.8061346918586	18.5829570017455	56.4663173970775	69.8831242388267	109.072052624192	0	MFN2	ENSGALG00000004523
8.93586164829333	0	0	0	0	0.957314831739385	TSPAN10	ENSGALG00000004525
32.169101933856	0	198.573216179722	156.737864364226	133.193756569927	83.2863903613265	TSHZ3	ENSGALG00000004528
1964.10239029487	2381.71565572372	1581.99799240812	1843.91614955876	1648.66602620414	1948.13568258965	VPS29	ENSGALG00000004529
425.347014458762	207.509686519492	288.919324015046	331.445674961292	788.674842051851	515.992694307528	MMD2	ENSGALG00000004530
2779.94655878405	2761.63388775941	2283.12143342183	1413.63577031684	1561.61813805214	2170.23272355319	PLOD1	ENSGALG00000004531
39.3177912524906	27.8744355026183	63.0540544267365	18.9682765791101	31.4630921031324	54.5669454091449	ZNF507	ENSGALG00000004532
46.4664805711253	46.4573925043638	24.4687375387336	29.9499103880686	59.7798749959515	18.1889818030483	KIAA2013	ENSGALG00000004533
1165.23635893745	995.220586093483	856.405813855675	1104.15336297346	780.284684157683	876.900385873276	DCTN4	ENSGALG00000004534
0	0	32.9386851482952	0	0	2.87194449521815	TNN	ENSGALG00000004538
290.415503569533	428.440397540244	348.208957281978	150.747882286612	465.653763126359	457.596489571426	ZMYND8	ENSGALG00000004542
10.723033977952	6.19431900058185	0	14.9749551940343	0	0	PPTC7	ENSGALG00000004550
907.883543466602	839.33022457884	664.420334705612	930.443882722664	1232.30444070602	439.407507768378	SGPL1	ENSGALG00000004553
1477.99151662772	2078.19402469521	1896.32715925185	1635.26510718854	1533.30135515932	2359.78106023758	CACYBP	ENSGALG00000004554
1351.10228122195	1125.3012851057	1168.8527701195	1024.28693527195	1628.73940120549	1778.69095737178	RBM22	ENSGALG00000004555
3544.85631587796	3274.7299783076	4737.5240296148	3758.71375370261	2446.77979588693	4057.10025691151	WIPI2	ENSGALG00000004557
344.030673459293	278.744355026183	290.801534594949	242.594274143356	127.949907886072	293.895653343991	DPY19L3	ENSGALG00000004559
545.087560545893	839.33022457884	776.411864209815	677.866305116619	1271.10892096655	814.674921810216	HVCN1	ENSGALG00000004562
0	0	0	0	2.09753947354216	2.87194449521815	CELA2A	ENSGALG00000004568
1477.99151662772	2110.19800619822	1481.29972638333	1006.3169890391	663.871243376093	882.644274863713	UNC5B	ENSGALG00000004569
573.682317820432	433.602330040729	381.147642430273	213.642694101556	595.701210485973	184.761762525701	NCOA3	ENSGALG00000004570
1981.08052742663	1576.45418564808	1873.74063229302	2568.70398095002	2568.43708535237	1699.23382633741	PPP1CC	ENSGALG00000004571
238.587506009432	417.084146039178	53.6430015272236	144.757900208998	475.092690757299	151.255743414823	LRRC8A	ENSGALG00000004573
4.46793082414666	0	0	0	3.14630921031324	0	NPPA	ENSGALG00000004574
163.526268163768	260.161398024438	333.151272642757	238.60095275828	291.55798682236	136.896020938732	RABGAP1L	ENSGALG00000004578
178.717232965867	260.161398024438	136.460267042937	279.532496955307	188.778552618794	90.9449090152416	NDST1	ENSGALG00000004581
[truncated: 13,986 more rows]

## Sheet: Supplementary_Table_3
#Supplementary_Table_3_Strong_active-Active-Poised_enhancer_regions
chr	start	end	region_ID	State_of_CE
chr1	43422	44053	region_1	Interzone_strong_active
chr1	87158	87392	region_2	Interzone_strong_active
chr1	89273	89699	region_3	Interzone_strong_active
chr1	93180	93508	region_4	Interzone_strong_active
chr1	319706	319851	region_5	Interzone_strong_active
chr1	386525	386531	region_6	Interzone_strong_active
chr1	400297	400391	region_7	Interzone_strong_active
chr1	754146	754310	region_8	Interzone_strong_active
chr1	756877	757312	region_9	Interzone_strong_active
chr1	763646	764244	region_10	Interzone_strong_active
chr1	765455	766615	region_11	Interzone_strong_active
chr1	1124163	1124360	region_12	Interzone_strong_active
chr1	1214212	1214285	region_13	Interzone_strong_active
chr1	1216092	1217345	region_14	Interzone_strong_active
chr1	1273805	1274086	region_15	Interzone_strong_active
chr1	1284828	1285147	region_16	Interzone_strong_active
chr1	1288001	1288674	region_17	Interzone_strong_active
chr1	1300272	1300538	region_18	Interzone_strong_active
chr1	1348631	1349474	region_19	Interzone_strong_active
chr1	1395128	1395258	region_20	Interzone_strong_active
chr1	1530532	1531079	region_21	Interzone_strong_active
chr1	1697255	1697991	region_22	Interzone_strong_active
chr1	1721826	1722369	region_23	Interzone_strong_active
chr1	1723944	1724791	region_24	Interzone_strong_active
chr1	1751799	1751827	region_25	Interzone_strong_active
chr1	1757196	1758058	region_26	Interzone_strong_active
chr1	1759069	1759300	region_27	Interzone_strong_active
chr1	1761082	1761233	region_28	Interzone_strong_active
chr1	1773471	1775073	region_29	Interzone_strong_active
chr1	1776111	1779965	region_30	Interzone_strong_active
chr1	1826425	1826913	region_31	Interzone_strong_active
chr1	1839433	1840001	region_32	Interzone_strong_active
chr1	2044665	2045631	region_33	Interzone_strong_active
chr1	2915246	2915673	region_34	Interzone_strong_active
chr1	3272964	3273126	region_35	Interzone_strong_active
chr1	3274720	3274963	region_36	Interzone_strong_active
chr1	4120709	4120940	region_37	Interzone_strong_active
chr1	4156044	4156240	region_38	Interzone_strong_active
chr1	4157548	4157808	region_39	Interzone_strong_active
chr1	4177791	4178128	region_40	Interzone_strong_active
chr1	4526363	4526739	region_41	Interzone_strong_active
chr1	4631054	4632325	region_42	Interzone_strong_active
chr1	5042456	5042537	region_43	Interzone_strong_active
chr1	5099440	5099976	region_44	Interzone_strong_active
chr1	5169710	5169946	region_45	Interzone_strong_active
chr1	5922812	5923800	region_46	Interzone_strong_active
chr1	6137677	6138631	region_47	Interzone_strong_active
chr1	6586507	6586641	region_48	Interzone_strong_active
chr1	6606328	6606456	region_49	Interzone_strong_active
chr1	6630031	6630466	region_50	Interzone_strong_active
chr1	6702484	6702691	region_51	Interzone_strong_active
chr1	6806450	6806761	region_52	Interzone_strong_active
chr1	7127320	7127423	region_53	Interzone_strong_active
chr1	7199207	7199297	region_54	Interzone_strong_active
chr1	7279631	7279893	region_55	Interzone_strong_active
chr1	7308111	7308997	region_56	Interzone_strong_active
chr1	7390102	7390230	region_57	Interzone_strong_active
chr1	7394543	7394646	region_58	Interzone_strong_active
chr1	7401803	7401821	region_59	Interzone_strong_active
chr1	7403199	7406559	region_60	Interzone_strong_active
chr1	7408104	7408401	region_61	Interzone_strong_active
chr1	7423163	7423511	region_62	Interzone_strong_active
chr1	7442754	7442858	region_63	Interzone_strong_active
chr1	7445413	7445638	region_64	Interzone_strong_active
chr1	7493779	7493966	region_65	Interzone_strong_active
chr1	7577123	7577418	region_66	Interzone_strong_active
chr1	7586179	7586640	region_67	Interzone_strong_active
chr1	7597142	7598434	region_68	Interzone_strong_active
chr1	7984818	7985720	region_69	Interzone_strong_active
chr1	7986811	7986990	region_70	Interzone_strong_active
chr1	8024906	8025764	region_71	Interzone_strong_active
chr1	8627381	8627677	region_72	Interzone_strong_active
chr1	8833647	8834245	region_73	Interzone_strong_active
chr1	8904497	8904768	region_74	Interzone_strong_active
chr1	8923855	8924000	region_75	Interzone_strong_active
chr1	8969752	8969869	region_76	Interzone_strong_active
chr1	8971833	8972176	region_77	Interzone_strong_active
chr1	8978907	8979246	region_78	Interzone_strong_active
chr1	8984053	8984251	region_79	Interzone_strong_active
chr1	9131056	9131658	region_80	Interzone_strong_active
chr1	9178556	9178701	region_81	Interzone_strong_active
chr1	9186205	9188615	region_82	Interzone_strong_active
chr1	9344697	9345045	region_83	Interzone_strong_active
chr1	9463992	9464344	region_84	Interzone_strong_active
chr1	9487194	9487330	region_85	Interzone_strong_active
chr1	11064027	11064351	region_86	Interzone_strong_active
chr1	11204539	11204885	region_87	Interzone_strong_active
chr1	11282498	11282503	region_88	Interzone_strong_active
chr1	11285074	11285447	region_89	Interzone_strong_active
chr1	11308589	11309012	region_90	Interzone_strong_active
chr1	12613331	12614196	region_91	Interzone_strong_active
chr1	12660838	12661195	region_92	Interzone_strong_active
chr1	12698316	12698582	region_93	Interzone_strong_active
chr1	12779714	12780050	region_94	Interzone_strong_active
chr1	12944345	12944481	region_95	Interzone_strong_active
chr1	12976567	12976764	region_96	Interzone_strong_active
chr1	12983130	12983323	region_97	Interzone_strong_active
chr1	12985560	12985726	region_98	Interzone_strong_active
chr1	13011689	13011836	region_99	Interzone_strong_active
chr1	13013862	13013935	region_100	Interzone_strong_active
chr1	13131231	13131449	region_101	Interzone_strong_active
chr1	13458330	13458407	region_102	Interzone_strong_active
chr1	13904391	13904716	region_103	Interzone_strong_active
chr1	13937855	13938480	region_104	Interzone_strong_active
chr1	13954573	13954843	region_105	Interzone_strong_active
chr1	13957482	13959126	region_106	Interzone_strong_active
chr1	14046686	14047943	region_107	Interzone_strong_active
chr1	14094758	14095425	region_108	Interzone_strong_active
chr1	14140082	14140341	region_109	Interzone_strong_active
chr1	14159525	14159569	region_110	Interzone_strong_active
chr1	14162249	14162344	region_111	Interzone_strong_active
chr1	14193850	14194443	region_112	Interzone_strong_active
chr1	14226825	14226988	region_113	Interzone_strong_active
chr1	14507339	14507762	region_114	Interzone_strong_active
chr1	14535556	14536646	region_115	Interzone_strong_active
chr1	14684493	14684847	region_116	Interzone_strong_active
chr1	14752962	14753061	region_117	Interzone_strong_active
chr1	14759838	14759963	region_118	Interzone_strong_active
chr1	14955193	14955826	region_119	Interzone_strong_active
chr1	14995511	14995613	region_120	Interzone_strong_active
chr1	15013154	15014851	region_121	Interzone_strong_active
chr1	15016757	15016982	region_122	Interzone_strong_active
chr1	15018160	15018368	region_123	Interzone_strong_active
chr1	15019918	15020459	region_124	Interzone_strong_active
chr1	15029810	15031214	region_125	Interzone_strong_active
chr1	15033607	15034416	region_126	Interzone_strong_active
chr1	15037071	15037250	region_127	Interzone_strong_active
chr1	15038925	15041509	region_128	Interzone_strong_active
chr1	15046158	15048203	region_129	Interzone_strong_active
chr1	15049601	15049921	region_130	Interzone_strong_active
chr1	15108734	15108920	region_131	Interzone_strong_active
chr1	15378903	15379122	region_132	Interzone_strong_active
chr1	15824050	15824315	region_133	Interzone_strong_active
chr1	15871931	15872108	region_134	Interzone_strong_active
chr1	15875952	15876169	region_135	Interzone_strong_active
chr1	15878801	15878973	region_136	Interzone_strong_active
chr1	15883412	15883625	region_137	Interzone_strong_active
chr1	15893268	15893434	region_138	Interzone_strong_active
chr1	15910046	15910192	region_139	Interzone_strong_active
chr1	15911401	15911509	region_140	Interzone_strong_active
chr1	16022252	16022304	region_141	Interzone_strong_active
chr1	17314504	17315805	region_142	Interzone_strong_active
chr1	18967145	18967368	region_143	Interzone_strong_active
chr1	18984430	18984994	region_144	Interzone_strong_active
chr1	19038622	19038754	region_145	Interzone_strong_active
chr1	19333949	19337931	region_146	Interzone_strong_active
chr1	22948841	22949437	region_147	Interzone_strong_active
chr1	23448280	23448910	region_148	Interzone_strong_active
chr1	23503715	23503801	region_149	Interzone_strong_active
chr1	23568715	23568945	region_150	Interzone_strong_active
chr1	23928007	23928144	region_151	Interzone_strong_active
chr1	24696396	24696510	region_152	Interzone_strong_active
chr1	24908717	24908901	region_153	Interzone_strong_active
chr1	25016589	25016689	region_154	Interzone_strong_active
chr1	25022211	25022409	region_155	Interzone_strong_active
chr1	25282564	25284034	region_156	Interzone_strong_active
chr1	25308307	25308717	region_157	Interzone_strong_active
chr1	25509050	25510260	region_158	Interzone_strong_active
chr1	25526137	25527665	region_159	Interzone_strong_active
chr1	25555356	25555909	region_160	Interzone_strong_active
chr1	25621388	25624330	region_161	Interzone_strong_active
chr1	25625841	25626165	region_162	Interzone_strong_active
chr1	25627421	25628581	region_163	Interzone_strong_active
chr1	25654874	25659643	region_164	Interzone_strong_active
chr1	25671935	25672257	region_165	Interzone_strong_active
chr1	25673470	25673533	region_166	Interzone_strong_active
chr1	25685068	25685716	region_167	Interzone_strong_active
chr1	25709295	25710650	region_168	Interzone_strong_active
chr1	25795400	25796377	region_169	Interzone_strong_active
chr1	25804494	25804731	region_170	Interzone_strong_active
chr1	25837569	25837886	region_171	Interzone_strong_active
chr1	25851189	25852632	region_172	Interzone_strong_active
chr1	25902303	25902357	region_173	Interzone_strong_active
chr1	25968407	25968857	region_174	Interzone_strong_active
chr1	25979192	25981115	region_175	Interzone_strong_active
chr1	26078526	26081562	region_176	Interzone_strong_active
chr1	26084630	26085530	region_177	Interzone_strong_active
chr1	26095597	26097965	region_178	Interzone_strong_active
chr1	26103164	26103532	region_179	Interzone_strong_active
chr1	26119765	26120229	region_180	Interzone_strong_active
chr1	26169668	26171178	region_181	Interzone_strong_active
chr1	26173309	26173421	region_182	Interzone_strong_active
chr1	26176008	26177652	region_183	Interzone_strong_active
chr1	26237478	26237854	region_184	Interzone_strong_active
chr1	26241433	26243424	region_185	Interzone_strong_active
chr1	26245744	26246443	region_186	Interzone_strong_active
chr1	26249272	26253883	region_187	Interzone_strong_active
chr1	26296929	26298946	region_188	Interzone_strong_active
chr1	26308769	26311393	region_189	Interzone_strong_active
chr1	26454289	26454670	region_190	Interzone_strong_active
chr1	26462387	26462577	region_191	Interzone_strong_active
chr1	26797321	26797610	region_192	Interzone_strong_active
chr1	26967974	26968669	region_193	Interzone_strong_active
chr1	27066515	27066687	region_194	Interzone_strong_active
chr1	28652170	28653293	region_195	Interzone_strong_active
chr1	29605434	29605484	region_196	Interzone_strong_active
chr1	29773425	29773846	region_197	Interzone_strong_active
chr1	29781111	29781699	region_198	Interzone_strong_active
chr1	29783516	29783746	region_199	Interzone_strong_active
chr1	29788171	29789023	region_200	Interzone_strong_active
chr1	29828497	29828902	region_201	Interzone_strong_active
chr1	29830150	29831268	region_202	Interzone_strong_active
chr1	29846648	29846981	region_203	Interzone_strong_active
chr1	29869705	29870550	region_204	Interzone_strong_active
chr1	30024404	30024595	region_205	Interzone_strong_active
chr1	30027686	30027736	region_206	Interzone_strong_active
chr1	30028866	30029396	region_207	Interzone_strong_active
chr1	30030469	30030847	region_208	Interzone_strong_active
chr1	30041745	30042195	region_209	Interzone_strong_active
chr1	30050456	30050693	region_210	Interzone_strong_active
chr1	30189364	30189530	region_211	Interzone_strong_active
chr1	30192356	30192454	region_212	Interzone_strong_active
chr1	30870583	30871345	region_213	Interzone_strong_active
chr1	30874030	30876813	region_214	Interzone_strong_active
chr1	30954549	30955130	region_215	Interzone_strong_active
chr1	31026341	31026943	region_216	Interzone_strong_active
chr1	31069344	31069443	region_217	Interzone_strong_active
chr1	31076291	31076478	region_218	Interzone_strong_active
chr1	31117268	31117871	region_219	Interzone_strong_active
chr1	31120317	31120655	region_220	Interzone_strong_active
chr1	31122741	31123231	region_221	Interzone_strong_active
chr1	31177880	31178380	region_222	Interzone_strong_active
chr1	31813854	31814134	region_223	Interzone_strong_active
chr1	31835490	31835922	region_224	Interzone_strong_active
chr1	31842890	31843492	region_225	Interzone_strong_active
chr1	31846511	31846555	region_226	Interzone_strong_active
chr1	31859618	31860890	region_227	Interzone_strong_active
chr1	31862898	31863936	region_228	Interzone_strong_active
chr1	31865180	31866246	region_229	Interzone_strong_active
chr1	31876548	31878208	region_230	Interzone_strong_active
chr1	31881695	31885419	region_231	Interzone_strong_active
chr1	31888027	31888262	region_232	Interzone_strong_active
chr1	31952508	31952927	region_233	Interzone_strong_active
chr1	32086004	32086535	region_234	Interzone_strong_active
chr1	33149111	33149130	region_235	Interzone_strong_active
chr1	33198310	33199492	region_236	Interzone_strong_active
chr1	33240764	33241024	region_237	Interzone_strong_active
chr1	33516353	33516461	region_238	Interzone_strong_active
chr1	33673243	33673629	region_239	Interzone_strong_active
chr1	33700234	33700307	region_240	Interzone_strong_active
chr1	33722689	33722754	region_241	Interzone_strong_active
chr1	33835205	33836618	region_242	Interzone_strong_active
chr1	33885739	33885908	region_243	Interzone_strong_active
chr1	34038556	34038783	region_244	Interzone_strong_active
chr1	34059064	34059435	region_245	Interzone_strong_active
chr1	34077750	34078009	region_246	Interzone_strong_active
chr1	34123017	34125009	region_247	Interzone_strong_active
chr1	34135676	34139779	region_248	Interzone_strong_active
chr1	34171134	34171750	region_249	Interzone_strong_active
chr1	34240362	34240973	region_250	Interzone_strong_active
chr1	34262026	34262129	region_251	Interzone_strong_active
chr1	34326559	34327210	region_252	Interzone_strong_active
chr1	34329166	34329631	region_253	Interzone_strong_active
chr1	34330812	34331069	region_254	Interzone_strong_active
chr1	34333729	34333750	region_255	Interzone_strong_active
chr1	34366701	34367311	region_256	Interzone_strong_active
chr1	34372399	34372955	region_257	Interzone_strong_active
chr1	34376333	34377746	region_258	Interzone_strong_active
chr1	34380216	34382266	region_259	Interzone_strong_active
chr1	34393414	34393691	region_260	Interzone_strong_active
chr1	34407124	34408005	region_261	Interzone_strong_active
chr1	34411710	34411965	region_262	Interzone_strong_active
chr1	34421157	34421331	region_263	Interzone_strong_active
chr1	34427389	34428415	region_264	Interzone_strong_active
chr1	34457381	34457818	region_265	Interzone_strong_active
chr1	34464434	34464802	region_266	Interzone_strong_active
chr1	34467467	34468892	region_267	Interzone_strong_active
chr1	34856639	34857725	region_268	Interzone_strong_active
chr1	34947639	34947692	region_269	Interzone_strong_active
chr1	35355399	35355671	region_270	Interzone_strong_active
chr1	35360770	35360924	region_271	Interzone_strong_active
chr1	35396232	35397317	region_272	Interzone_strong_active
chr1	35528462	35528566	region_273	Interzone_strong_active
chr1	35532791	35533031	region_274	Interzone_strong_active
chr1	35546169	35547470	region_275	Interzone_strong_active
chr1	35572701	35573096	region_276	Interzone_strong_active
chr1	35665866	35665979	region_277	Interzone_strong_active
chr1	35737327	35738466	region_278	Interzone_strong_active
chr1	35892067	35892222	region_279	Interzone_strong_active
chr1	36332281	36332714	region_280	Interzone_strong_active
chr1	36350686	36351001	region_281	Interzone_strong_active
chr1	36383260	36385133	region_282	Interzone_strong_active
chr1	36398765	36399131	region_283	Interzone_strong_active
chr1	36466067	36466916	region_284	Interzone_strong_active
chr1	36471587	36471914	region_285	Interzone_strong_active
chr1	36683575	36683706	region_286	Interzone_strong_active
chr1	38020198	38021081	region_287	Interzone_strong_active
chr1	38115346	38115450	region_288	Interzone_strong_active
chr1	38322927	38323133	region_289	Interzone_strong_active
chr1	38324607	38324797	region_290	Interzone_strong_active
chr1	38970436	38970651	region_291	Interzone_strong_active
chr1	39725878	39726120	region_292	Interzone_strong_active
chr1	39740894	39740986	region_293	Interzone_strong_active
chr1	39766670	39766860	region_294	Interzone_strong_active
chr1	39834453	39834569	region_295	Interzone_strong_active
chr1	40580321	40580858	region_296	Interzone_strong_active
chr1	40790519	40790859	region_297	Interzone_strong_active
chr1	40892861	40893718	region_298	Interzone_strong_active
chr1	41072110	41073210	region_299	Interzone_strong_active
chr1	41078523	41078658	region_300	Interzone_strong_active
chr1	43320973	43324753	region_301	Interzone_strong_active
chr1	43568345	43568490	region_302	Interzone_strong_active
chr1	43611505	43611876	region_303	Interzone_strong_active
chr1	43710567	43711218	region_304	Interzone_strong_active
chr1	43713049	43713338	region_305	Interzone_strong_active
chr1	43991524	43992273	region_306	Interzone_strong_active
chr1	44007890	44007951	region_307	Interzone_strong_active
chr1	44018366	44019352	region_308	Interzone_strong_active
chr1	44029935	44030076	region_309	Interzone_strong_active
chr1	44067187	44067351	region_310	Interzone_strong_active
chr1	44085324	44085613	region_311	Interzone_strong_active
chr1	44088552	44090984	region_312	Interzone_strong_active
chr1	44407036	44407657	region_313	Interzone_strong_active
chr1	44428741	44432233	region_314	Interzone_strong_active
chr1	44482617	44483165	region_315	Interzone_strong_active
chr1	44568404	44568526	region_316	Interzone_strong_active
chr1	44635658	44635799	region_317	Interzone_strong_active
chr1	44656192	44656746	region_318	Interzone_strong_active
chr1	44847102	44848091	region_319	Interzone_strong_active
chr1	44941726	44941828	region_320	Interzone_strong_active
chr1	44961825	44962097	region_321	Interzone_strong_active
chr1	45004304	45004766	region_322	Interzone_strong_active
chr1	45020846	45021278	region_323	Interzone_strong_active
chr1	45153015	45153066	region_324	Interzone_strong_active
chr1	45235923	45236097	region_325	Interzone_strong_active
chr1	45458733	45459647	region_326	Interzone_strong_active
chr1	45468482	45468541	region_327	Interzone_strong_active
chr1	45504633	45505703	region_328	Interzone_strong_active
chr1	45636904	45637939	region_329	Interzone_strong_active
chr1	45661859	45662410	region_330	Interzone_strong_active
chr1	45726804	45726921	region_331	Interzone_strong_active
chr1	45782302	45782580	region_332	Interzone_strong_active
chr1	45785310	45785473	region_333	Interzone_strong_active
chr1	45790631	45792009	region_334	Interzone_strong_active
chr1	45813916	45814728	region_335	Interzone_strong_active
chr1	45824586	45825400	region_336	Interzone_strong_active
chr1	46697614	46698010	region_337	Interzone_strong_active
chr1	47211334	47211476	region_338	Interzone_strong_active
chr1	47703794	47703911	region_339	Interzone_strong_active
chr1	47853767	47853937	region_340	Interzone_strong_active
chr1	47921525	47921661	region_341	Interzone_strong_active
chr1	48056285	48056316	region_342	Interzone_strong_active
chr1	48074614	48075576	region_343	Interzone_strong_active
chr1	48089909	48089930	region_344	Interzone_strong_active
chr1	48118729	48118853	region_345	Interzone_strong_active
chr1	48619074	48619258	region_346	Interzone_strong_active
chr1	48809654	48810294	region_347	Interzone_strong_active
chr1	48836070	48836188	region_348	Interzone_strong_active
chr1	48839369	48841573	region_349	Interzone_strong_active
chr1	48905859	48906040	region_350	Interzone_strong_active
chr1	49110598	49111413	region_351	Interzone_strong_active
chr1	49116180	49116468	region_352	Interzone_strong_active
chr1	49127687	49128328	region_353	Interzone_strong_active
chr1	49201897	49202028	region_354	Interzone_strong_active
chr1	49203886	49204171	region_355	Interzone_strong_active
chr1	49205836	49205965	region_356	Interzone_strong_active
chr1	49208841	49208998	region_357	Interzone_strong_active
chr1	49210097	49210385	region_358	Interzone_strong_active
chr1	49212065	49212238	region_359	Interzone_strong_active
chr1	49237753	49237838	region_360	Interzone_strong_active
chr1	49307612	49308029	region_361	Interzone_strong_active
chr1	49322276	49323606	region_362	Interzone_strong_active
chr1	49385301	49385645	region_363	Interzone_strong_active
chr1	49390471	49391801	region_364	Interzone_strong_active
chr1	49416197	49416580	region_365	Interzone_strong_active
chr1	49429270	49429280	region_366	Interzone_strong_active
chr1	49510083	49511734	region_367	Interzone_strong_active
chr1	49587573	49588589	region_368	Interzone_strong_active
chr1	49673952	49674812	region_369	Interzone_strong_active
chr1	49696080	49696233	region_370	Interzone_strong_active
chr1	49722341	49722372	region_371	Interzone_strong_active
chr1	49729964	49731404	region_372	Interzone_strong_active
chr1	49748579	49748699	region_373	Interzone_strong_active
chr1	49752667	49752794	region_374	Interzone_strong_active
chr1	49823116	49823396	region_375	Interzone_strong_active
chr1	49837361	49838473	region_376	Interzone_strong_active
chr1	49905001	49905115	region_377	Interzone_strong_active
chr1	49918090	49918385	region_378	Interzone_strong_active
chr1	49935141	49935225	region_379	Interzone_strong_active
chr1	49942064	49942189	region_380	Interzone_strong_active
chr1	50002502	50002659	region_381	Interzone_strong_active
chr1	50063845	50063967	region_382	Interzone_strong_active
chr1	50107775	50108191	region_383	Interzone_strong_active
chr1	50115928	50116580	region_384	Interzone_strong_active
chr1	50193250	50194505	region_385	Interzone_strong_active
chr1	50208950	50209134	region_386	Interzone_strong_active
chr1	50426827	50427214	region_387	Interzone_strong_active
chr1	50571593	50571819	region_388	Interzone_strong_active
chr1	50599312	50601206	region_389	Interzone_strong_active
chr1	50667274	50667461	region_390	Interzone_strong_active
chr1	50692584	50692596	region_391	Interzone_strong_active
chr1	50696847	50697446	region_392	Interzone_strong_active
chr1	50734355	50735523	region_393	Interzone_strong_active
chr1	50738591	50738887	region_394	Interzone_strong_active
chr1	50743962	50744590	region_395	Interzone_strong_active
chr1	50753702	50753832	region_396	Interzone_strong_active
chr1	50757782	50758396	region_397	Interzone_strong_active
chr1	50768306	50768639	region_398	Interzone_strong_active
chr1	50781068	50781294	region_399	Interzone_strong_active
chr1	50805215	50805571	region_400	Interzone_strong_active
chr1	50810444	50810498	region_401	Interzone_strong_active
chr1	50812878	50813206	region_402	Interzone_strong_active
chr1	50814413	50814515	region_403	Interzone_strong_active
chr1	50845874	50845977	region_404	Interzone_strong_active
chr1	50876179	50876269	region_405	Interzone_strong_active
chr1	50894799	50894834	region_406	Interzone_strong_active
chr1	50899838	50901205	region_407	Interzone_strong_active
chr1	50944595	50944684	region_408	Interzone_strong_active
chr1	50995982	50996098	region_409	Interzone_strong_active
chr1	51043801	51044059	region_410	Interzone_strong_active
chr1	51049772	51049963	region_411	Interzone_strong_active
chr1	51140600	51140634	region_412	Interzone_strong_active
chr1	51142204	51142225	region_413	Interzone_strong_active
chr1	51160650	51160750	region_414	Interzone_strong_active
chr1	51203844	51203859	region_415	Interzone_strong_active
chr1	51221483	51222386	region_416	Interzone_strong_active
chr1	51227938	51228104	region_417	Interzone_strong_active
chr1	51421809	51421989	region_418	Interzone_strong_active
chr1	51441416	51441554	region_419	Interzone_strong_active
chr1	51764552	51764810	region_420	Interzone_strong_active
chr1	51766805	51767324	region_421	Interzone_strong_active
chr1	51779304	51779604	region_422	Interzone_strong_active
chr1	51783215	51784745	region_423	Interzone_strong_active
chr1	51816797	51818155	region_424	Interzone_strong_active
chr1	51831142	51832018	region_425	Interzone_strong_active
chr1	51834253	51834486	region_426	Interzone_strong_active
chr1	51855060	51855342	region_427	Interzone_strong_active
chr1	51858018	51858140	region_428	Interzone_strong_active
chr1	51886025	51886561	region_429	Interzone_strong_active
chr1	51893543	51894102	region_430	Interzone_strong_active
chr1	51895319	51895662	region_431	Interzone_strong_active
chr1	51908846	51909897	region_432	Interzone_strong_active
chr1	51913618	51914544	region_433	Interzone_strong_active
chr1	51916129	51916617	region_434	Interzone_strong_active
chr1	51937038	51937392	region_435	Interzone_strong_active
chr1	51972623	51973056	region_436	Interzone_strong_active
chr1	51993190	51993971	region_437	Interzone_strong_active
chr1	52100821	52102200	region_438	Interzone_strong_active
chr1	52105662	52105673	region_439	Interzone_strong_active
chr1	52130277	52130375	region_440	Interzone_strong_active
chr1	52151268	52151819	region_441	Interzone_strong_active
chr1	52370243	52370732	region_442	Interzone_strong_active
chr1	52676338	52677537	region_443	Interzone_strong_active
chr1	53066151	53066291	region_444	Interzone_strong_active
chr1	53081112	53081365	region_445	Interzone_strong_active
chr1	53090608	53090935	region_446	Interzone_strong_active
chr1	53093353	53096891	region_447	Interzone_strong_active
chr1	53103595	53103703	region_448	Interzone_strong_active
chr1	53106784	53107008	region_449	Interzone_strong_active
chr1	53110671	53111036	region_450	Interzone_strong_active
chr1	53134296	53134524	region_451	Interzone_strong_active
chr1	53287616	53287705	region_452	Interzone_strong_active
chr1	53326509	53326615	region_453	Interzone_strong_active
chr1	53339567	53339846	region_454	Interzone_strong_active
chr1	53341696	53342068	region_455	Interzone_strong_active
chr1	53355423	53356116	region_456	Interzone_strong_active
chr1	53433631	53433860	region_457	Interzone_strong_active
chr1	53544120	53544285	region_458	Interzone_strong_active
chr1	53616205	53616492	region_459	Interzone_strong_active
chr1	53863682	53864360	region_460	Interzone_strong_active
chr1	53907325	53907467	region_461	Interzone_strong_active
chr1	53940577	53941044	region_462	Interzone_strong_active
chr1	53944165	53944727	region_463	Interzone_strong_active
chr1	53954816	53955063	region_464	Interzone_strong_active
chr1	53959759	53960387	region_465	Interzone_strong_active
chr1	53961778	53961978	region_466	Interzone_strong_active
chr1	53966380	53966697	region_467	Interzone_strong_active
chr1	53967956	53968165	region_468	Interzone_strong_active
chr1	53969184	53970061	region_469	Interzone_strong_active
chr1	53972912	53973086	region_470	Interzone_strong_active
chr1	53980292	53980811	region_471	Interzone_strong_active
chr1	53995241	53995742	region_472	Interzone_strong_active
chr1	54100503	54101445	region_473	Interzone_strong_active
chr1	54110627	54110808	region_474	Interzone_strong_active
chr1	54136126	54136621	region_475	Interzone_strong_active
chr1	54243389	54244052	region_476	Interzone_strong_active
chr1	54250634	54250736	region_477	Interzone_strong_active
chr1	54268870	54269152	region_478	Interzone_strong_active
chr1	54344156	54345241	region_479	Interzone_strong_active
chr1	54346749	54347005	region_480	Interzone_strong_active
chr1	54690075	54690310	region_481	Interzone_strong_active
chr1	54691662	54692618	region_482	Interzone_strong_active
chr1	54701696	54701755	region_483	Interzone_strong_active
chr1	54714423	54717932	region_484	Interzone_strong_active
chr1	54762664	54764364	region_485	Interzone_strong_active
chr1	54766238	54766391	region_486	Interzone_strong_active
chr1	55150405	55150502	region_487	Interzone_strong_active
chr1	55152369	55153088	region_488	Interzone_strong_active
chr1	55184656	55185007	region_489	Interzone_strong_active
chr1	55238476	55238892	region_490	Interzone_strong_active
chr1	55279985	55280094	region_491	Interzone_strong_active
chr1	55293825	55294203	region_492	Interzone_strong_active
chr1	55451108	55451132	region_493	Interzone_strong_active
chr1	55796621	55796941	region_494	Interzone_strong_active
chr1	56132051	56132220	region_495	Interzone_strong_active
chr1	56150357	56151726	region_496	Interzone_strong_active
chr1	56242862	56242991	region_497	Interzone_strong_active
chr1	56345686	56345761	region_498	Interzone_strong_active
chr1	56362386	56362520	region_499	Interzone_strong_active
chr1	56386214	56386811	region_500	Interzone_strong_active
chr1	56526082	56526190	region_501	Interzone_strong_active
chr1	56579067	56579613	region_502	Interzone_strong_active
chr1	56646982	56647107	region_503	Interzone_strong_active
chr1	56752441	56753354	region_504	Interzone_strong_active
chr1	56754999	56756079	region_505	Interzone_strong_active
chr1	56764594	56764690	region_506	Interzone_strong_active
chr1	56837490	56837738	region_507	Interzone_strong_active
chr1	56838904	56839610	region_508	Interzone_strong_active
chr1	56844505	56844762	region_509	Interzone_strong_active
chr1	56846317	56847347	region_510	Interzone_strong_active
chr1	56919583	56919618	region_511	Interzone_strong_active
chr1	57033472	57034116	region_512	Interzone_strong_active
chr1	57390486	57390781	region_513	Interzone_strong_active
chr1	57406020	57406238	region_514	Interzone_strong_active
chr1	57407793	57407925	region_515	Interzone_strong_active
chr1	57409688	57409892	region_516	Interzone_strong_active
chr1	58379101	58379302	region_517	Interzone_strong_active
chr1	58905272	58905359	region_518	Interzone_strong_active
chr1	58930037	58930175	region_519	Interzone_strong_active
chr1	59517731	59517939	region_520	Interzone_strong_active
chr1	59518955	59519118	region_521	Interzone_strong_active
chr1	59520139	59520315	region_522	Interzone_strong_active
chr1	59761259	59761325	region_523	Interzone_strong_active
chr1	59799766	59799969	region_524	Interzone_strong_active
chr1	59807878	59808402	region_525	Interzone_strong_active
chr1	59820450	59820961	region_526	Interzone_strong_active
chr1	59832937	59833080	region_527	Interzone_strong_active
chr1	59838422	59838578	region_528	Interzone_strong_active
chr1	59841515	59841587	region_529	Interzone_strong_active
chr1	59907706	59907942	region_530	Interzone_strong_active
chr1	59913406	59913455	region_531	Interzone_strong_active
chr1	59937691	59937746	region_532	Interzone_strong_active
chr1	60269235	60269279	region_533	Interzone_strong_active
chr1	60272523	60272772	region_534	Interzone_strong_active
chr1	60350272	60350632	region_535	Interzone_strong_active
chr1	60430998	60431043	region_536	Interzone_strong_active
chr1	60445079	60445228	region_537	Interzone_strong_active
chr1	60462066	60462202	region_538	Interzone_strong_active
chr1	60528259	60528563	region_539	Interzone_strong_active
chr1	60531384	60531968	region_540	Interzone_strong_active
chr1	60535609	60535847	region_541	Interzone_strong_active
chr1	60627328	60627363	region_542	Interzone_strong_active
chr1	60678550	60678854	region_543	Interzone_strong_active
chr1	60730228	60730979	region_544	Interzone_strong_active
chr1	60765581	60766198	region_545	Interzone_strong_active
chr1	60875680	60876096	region_546	Interzone_strong_active
chr1	60880890	60884317	region_547	Interzone_strong_active
chr1	60901765	60902459	region_548	Interzone_strong_active
chr1	60916840	60917610	region_549	Interzone_strong_active
chr1	60960943	60961161	region_550	Interzone_strong_active
chr1	60962168	60962398	region_551	Interzone_strong_active
chr1	60963605	60963845	region_552	Interzone_strong_active
chr1	60965278	60966076	region_553	Interzone_strong_active
chr1	60967297	60968029	region_554	Interzone_strong_active
chr1	60975616	60975942	region_555	Interzone_strong_active
chr1	61045276	61045394	region_556	Interzone_strong_active
chr1	61172096	61173707	region_557	Interzone_strong_active
chr1	61648941	61649794	region_558	Interzone_strong_active
chr1	61835384	61835995	region_559	Interzone_strong_active
chr1	61842802	61842806	region_560	Interzone_strong_active
chr1	61942591	61942643	region_561	Interzone_strong_active
chr1	61958221	61959151	region_562	Interzone_strong_active
chr1	61969353	61969641	region_563	Interzone_strong_active
chr1	62112174	62112683	region_564	Interzone_strong_active
chr1	62175594	62175613	region_565	Interzone_strong_active
chr1	62183174	62183609	region_566	Interzone_strong_active
chr1	62218539	62218975	region_567	Interzone_strong_active
chr1	62268820	62269530	region_568	Interzone_strong_active
chr1	62292084	62292410	region_569	Interzone_strong_active
chr1	62296375	62296706	region_570	Interzone_strong_active
chr1	62310786	62311104	region_571	Interzone_strong_active
chr1	62343108	62343287	region_572	Interzone_strong_active
chr1	62360711	62360921	region_573	Interzone_strong_active
chr1	62378640	62379175	region_574	Interzone_strong_active
chr1	62413384	62413696	region_575	Interzone_strong_active
chr1	62428806	62429089	region_576	Interzone_strong_active
chr1	62458829	62459450	region_577	Interzone_strong_active
chr1	62463577	62464747	region_578	Interzone_strong_active
chr1	62634288	62634380	region_579	Interzone_strong_active
chr1	63099906	63100081	region_580	Interzone_strong_active
chr1	63190806	63191152	region_581	Interzone_strong_active
chr1	63227583	63227940	region_582	Interzone_strong_active
chr1	63243090	63243304	region_583	Interzone_strong_active
chr1	63260259	63260662	region_584	Interzone_strong_active
chr1	63283323	63283583	region_585	Interzone_strong_active
chr1	63305692	63306272	region_586	Interzone_strong_active
chr1	63347432	63347439	region_587	Interzone_strong_active
chr1	63351609	63352650	region_588	Interzone_strong_active
chr1	63370168	63370377	region_589	Interzone_strong_active
chr1	63371767	63373600	region_590	Interzone_strong_active
chr1	63383690	63384453	region_591	Interzone_strong_active
chr1	63398226	63398416	region_592	Interzone_strong_active
chr1	63401657	63401919	region_593	Interzone_strong_active
chr1	63406559	63409758	region_594	Interzone_strong_active
chr1	63601988	63604262	region_595	Interzone_strong_active
chr1	63685444	63685496	region_596	Interzone_strong_active
chr1	64495178	64495529	region_597	Interzone_strong_active
chr1	64513372	64513546	region_598	Interzone_strong_active
chr1	64517591	64517950	region_599	Interzone_strong_active
chr1	64555449	64555697	region_600	Interzone_strong_active
chr1	64887129	64887398	region_601	Interzone_strong_active
chr1	65014751	65015240	region_602	Interzone_strong_active
chr1	65065900	65066172	region_603	Interzone_strong_active
chr1	65207606	65207708	region_604	Interzone_strong_active
chr1	65232892	65234781	region_605	Interzone_strong_active
chr1	65398709	65398886	region_606	Interzone_strong_active
chr1	65425045	65425515	region_607	Interzone_strong_active
chr1	65435767	65435884	region_608	Interzone_strong_active
chr1	65438848	65439360	region_609	Interzone_strong_active
chr1	65449514	65450871	region_610	Interzone_strong_active
chr1	65456188	65456633	region_611	Interzone_strong_active
chr1	65457663	65458155	region_612	Interzone_strong_active
chr1	65462739	65462973	region_613	Interzone_strong_active
chr1	65530723	65531581	region_614	Interzone_strong_active
chr1	65539579	65539794	region_615	Interzone_strong_active
chr1	65613507	65613731	region_616	Interzone_strong_active
chr1	65649965	65650248	region_617	Interzone_strong_active
chr1	65691487	65691544	region_618	Interzone_strong_active
chr1	65801264	65801297	region_619	Interzone_strong_active
chr1	65883642	65885651	region_620	Interzone_strong_active
chr1	65895324	65896201	region_621	Interzone_strong_active
chr1	65910110	65910513	region_622	Interzone_strong_active
chr1	65926285	65926413	region_623	Interzone_strong_active
chr1	65963013	65963790	region_624	Interzone_strong_active
chr1	65974354	65974881	region_625	Interzone_strong_active
chr1	65992879	65993138	region_626	Interzone_strong_active
chr1	65997758	66000529	region_627	Interzone_strong_active
chr1	66006029	66006262	region_628	Interzone_strong_active
chr1	66012028	66012349	region_629	Interzone_strong_active
chr1	66013745	66016491	region_630	Interzone_strong_active
chr1	66018172	66018804	region_631	Interzone_strong_active
chr1	66029640	66029943	region_632	Interzone_strong_active
chr1	66054926	66055205	region_633	Interzone_strong_active
chr1	66061486	66062088	region_634	Interzone_strong_active
chr1	66074021	66074811	region_635	Interzone_strong_active
chr1	66076345	66076573	region_636	Interzone_strong_active
chr1	66078481	66078533	region_637	Interzone_strong_active
chr1	66082148	66082398	region_638	Interzone_strong_active
chr1	66088974	66089068	region_639	Interzone_strong_active
chr1	66097131	66097617	region_640	Interzone_strong_active
chr1	66099279	66099608	region_641	Interzone_strong_active
chr1	66119847	66120529	region_642	Interzone_strong_active
chr1	66144807	66146581	region_643	Interzone_strong_active
chr1	66148815	66149531	region_644	Interzone_strong_active
chr1	66150903	66153624	region_645	Interzone_strong_active
chr1	66164849	66165614	region_646	Interzone_strong_active
chr1	66169850	66169940	region_647	Interzone_strong_active
chr1	66212787	66213184	region_648	Interzone_strong_active
chr1	66250604	66251493	region_649	Interzone_strong_active
chr1	66266271	66266560	region_650	Interzone_strong_active
chr1	66279536	66280009	region_651	Interzone_strong_active
chr1	66282004	66282308	region_652	Interzone_strong_active
chr1	66295373	66296575	region_653	Interzone_strong_active
chr1	66300795	66301937	region_654	Interzone_strong_active
chr1	66336457	66337251	region_655	Interzone_strong_active
chr1	66404960	66405162	region_656	Interzone_strong_active
chr1	66407257	66407721	region_657	Interzone_strong_active
chr1	66452741	66453067	region_658	Interzone_strong_active
chr1	66454149	66454287	region_659	Interzone_strong_active
chr1	66467747	66468054	region_660	Interzone_strong_active
chr1	66509243	66509431	region_661	Interzone_strong_active
chr1	66558354	66558428	region_662	Interzone_strong_active
chr1	66650289	66650909	region_663	Interzone_strong_active
chr1	67033975	67035220	region_664	Interzone_strong_active
chr1	67037361	67037535	region_665	Interzone_strong_active
chr1	67564187	67565012	region_666	Interzone_strong_active
chr1	67587262	67588838	region_667	Interzone_strong_active
chr1	67633259	67633420	region_668	Interzone_strong_active
chr1	67660614	67660783	region_669	Interzone_strong_active
chr1	67738340	67738464	region_670	Interzone_strong_active
chr1	67762252	67762650	region_671	Interzone_strong_active
chr1	67779502	67779675	region_672	Interzone_strong_active
chr1	68242455	68242616	region_673	Interzone_strong_active
chr1	68244666	68244944	region_674	Interzone_strong_active
chr1	68309450	68309609	region_675	Interzone_strong_active
chr1	68414007	68414041	region_676	Interzone_strong_active
chr1	69073678	69074254	region_677	Interzone_strong_active
chr1	70068237	70068515	region_678	Interzone_strong_active
chr1	70077781	70078267	region_679	Interzone_strong_active
chr1	70209208	70209381	region_680	Interzone_strong_active
chr1	71077611	71078103	region_681	Interzone_strong_active
chr1	71101296	71101427	region_682	Interzone_strong_active
chr1	71175398	71175664	region_683	Interzone_strong_active
chr1	71504170	71504375	region_684	Interzone_strong_active
chr1	71508446	71509634	region_685	Interzone_strong_active
chr1	71513574	71514631	region_686	Interzone_strong_active
chr1	71522688	71523050	region_687	Interzone_strong_active
chr1	71604505	71604752	region_688	Interzone_strong_active
chr1	71667640	71667664	region_689	Interzone_strong_active
chr1	71802794	71802984	region_690	Interzone_strong_active
chr1	71807890	71808219	region_691	Interzone_strong_active
chr1	71940630	71941715	region_692	Interzone_strong_active
chr1	72099573	72099856	region_693	Interzone_strong_active
chr1	72103122	72105986	region_694	Interzone_strong_active
chr1	72698171	72698994	region_695	Interzone_strong_active
chr1	72705369	72705766	region_696	Interzone_strong_active
chr1	72731256	72731519	region_697	Interzone_strong_active
chr1	72743425	72743467	region_698	Interzone_strong_active
chr1	72753520	72753545	region_699	Interzone_strong_active
chr1	72761704	72763763	region_700	Interzone_strong_active
chr1	73132228	73132411	region_701	Interzone_strong_active
chr1	73286605	73286730	region_702	Interzone_strong_active
chr1	73487840	73488265	region_703	Interzone_strong_active
chr1	73512218	73513248	region_704	Interzone_strong_active
chr1	75551176	75551323	region_705	Interzone_strong_active
chr1	75869267	75869431	region_706	Interzone_strong_active
chr1	76002672	76002723	region_707	Interzone_strong_active
chr1	76007879	76008520	region_708	Interzone_strong_active
chr1	77171031	77171575	region_709	Interzone_strong_active
chr1	77400831	77401856	region_710	Interzone_strong_active
chr1	77582880	77583117	region_711	Interzone_strong_active
chr1	77617949	77618106	region_712	Interzone_strong_active
chr1	77620373	77623463	region_713	Interzone_strong_active
chr1	77655877	77656328	region_714	Interzone_strong_active
chr1	77674410	77677281	region_715	Interzone_strong_active
chr1	77681727	77682917	region_716	Interzone_strong_active
chr1	77838367	77839165	region_717	Interzone_strong_active
chr1	77843448	77843467	region_718	Interzone_strong_active
chr1	77845911	77846788	region_719	Interzone_strong_active
chr1	77892430	77893114	region_720	Interzone_strong_active
chr1	77901411	77902158	region_721	Interzone_strong_active
chr1	77923626	77923793	region_722	Interzone_strong_active
chr1	77941748	77943260	region_723	Interzone_strong_active
chr1	78006316	78006487	region_724	Interzone_strong_active
chr1	78021569	78021897	region_725	Interzone_strong_active
chr1	78070291	78070668	region_726	Interzone_strong_active
chr1	78182261	78182818	region_727	Interzone_strong_active
chr1	78208690	78208932	region_728	Interzone_strong_active
chr1	79383644	79384565	region_729	Interzone_strong_active
chr1	79493543	79493920	region_730	Interzone_strong_active
chr1	79661550	79662103	region_731	Interzone_strong_active
chr1	79713104	79714163	region_732	Interzone_strong_active
chr1	79905456	79905534	region_733	Interzone_strong_active
chr1	79907819	79908106	region_734	Interzone_strong_active
chr1	79966518	79966652	region_735	Interzone_strong_active
chr1	79968034	79968226	region_736	Interzone_strong_active
chr1	79979645	79979839	region_737	Interzone_strong_active
chr1	80017487	80017857	region_738	Interzone_strong_active
chr1	80141850	80142461	region_739	Interzone_strong_active
chr1	80592065	80592070	region_740	Interzone_strong_active
chr1	80651348	80651517	region_741	Interzone_strong_active
chr1	80677970	80678099	region_742	Interzone_strong_active
chr1	80706754	80706878	region_743	Interzone_strong_active
chr1	80886187	80887040	region_744	Interzone_strong_active
chr1	80903248	80903486	region_745	Interzone_strong_active
chr1	80939615	80939762	region_746	Interzone_strong_active
chr1	80963598	80963720	region_747	Interzone_strong_active
chr1	81002293	81002640	region_748	Interzone_strong_active
chr1	81049702	81049735	region_749	Interzone_strong_active
chr1	81338233	81338313	region_750	Interzone_strong_active
chr1	81498037	81498278	region_751	Interzone_strong_active
chr1	82096569	82097129	region_752	Interzone_strong_active
chr1	82100991	82101064	region_753	Interzone_strong_active
chr1	82237710	82237961	region_754	Interzone_strong_active
chr1	82251055	82252038	region_755	Interzone_strong_active
chr1	82718486	82719794	region_756	Interzone_strong_active
chr1	82874664	82875128	region_757	Interzone_strong_active
chr1	82879317	82879722	region_758	Interzone_strong_active
chr1	83220031	83220309	region_759	Interzone_strong_active
chr1	83246052	83248026	region_760	Interzone_strong_active
chr1	83274451	83275339	region_761	Interzone_strong_active
chr1	83285677	83286302	region_762	Interzone_strong_active
chr1	83325466	83325666	region_763	Interzone_strong_active
chr1	83330916	83331253	region_764	Interzone_strong_active
chr1	83352351	83352894	region_765	Interzone_strong_active
chr1	83408193	83408890	region_766	Interzone_strong_active
chr1	83453958	83453999	region_767	Interzone_strong_active
chr1	83460021	83461087	region_768	Interzone_strong_active
chr1	83491051	83491938	region_769	Interzone_strong_active
chr1	83525002	83525436	region_770	Interzone_strong_active
chr1	83598303	83598630	region_771	Interzone_strong_active
chr1	83607879	83608277	region_772	Interzone_strong_active
chr1	83610077	83611133	region_773	Interzone_strong_active
chr1	83664436	83664614	region_774	Interzone_strong_active
chr1	83670731	83671408	region_775	Interzone_strong_active
chr1	84101972	84102076	region_776	Interzone_strong_active
chr1	84409439	84410590	region_777	Interzone_strong_active
chr1	84412682	84414350	region_778	Interzone_strong_active
chr1	84416599	84418799	region_779	Interzone_strong_active
chr1	84421634	84424641	region_780	Interzone_strong_active
chr1	84426132	84426176	region_781	Interzone_strong_active
chr1	84437624	84437930	region_782	Interzone_strong_active
chr1	84446443	84446750	region_783	Interzone_strong_active
chr1	84453792	84454135	region_784	Interzone_strong_active
chr1	84462767	84462938	region_785	Interzone_strong_active
chr1	84466239	84466333	region_786	Interzone_strong_active
chr1	84470544	84470694	region_787	Interzone_strong_active
chr1	84473165	84473841	region_788	Interzone_strong_active
chr1	84477544	84477809	region_789	Interzone_strong_active
chr1	84483411	84484055	region_790	Interzone_strong_active
chr1	84519738	84521093	region_791	Interzone_strong_active
chr1	84530220	84531454	region_792	Interzone_strong_active
chr1	84599238	84599327	region_793	Interzone_strong_active
chr1	84607884	84608129	region_794	Interzone_strong_active
chr1	84662736	84664569	region_795	Interzone_strong_active
chr1	84669318	84669533	region_796	Interzone_strong_active
chr1	84679191	84679336	region_797	Interzone_strong_active
chr1	84690972	84691106	region_798	Interzone_strong_active
chr1	84699884	84700003	region_799	Interzone_strong_active
chr1	84910328	84912390	region_800	Interzone_strong_active
chr1	85603390	85603748	region_801	Interzone_strong_active
chr1	85693755	85693841	region_802	Interzone_strong_active
chr1	85789265	85789441	region_803	Interzone_strong_active
chr1	85824674	85825276	region_804	Interzone_strong_active
chr1	85852600	85852955	region_805	Interzone_strong_active
chr1	85917984	85918144	region_806	Interzone_strong_active
chr1	85921632	85921911	region_807	Interzone_strong_active
chr1	85976577	85977172	region_808	Interzone_strong_active
chr1	86047416	86047675	region_809	Interzone_strong_active
chr1	86050145	86051008	region_810	Interzone_strong_active
chr1	86053100	86053272	region_811	Interzone_strong_active
chr1	86431321	86431505	region_812	Interzone_strong_active
chr1	86471492	86471688	region_813	Interzone_strong_active
chr1	86529524	86530480	region_814	Interzone_strong_active
chr1	86531529	86532367	region_815	Interzone_strong_active
chr1	88326565	88327310	region_816	Interzone_strong_active
chr1	88445553	88445762	region_817	Interzone_strong_active
chr1	88448472	88449108	region_818	Interzone_strong_active
chr1	88450505	88450883	region_819	Interzone_strong_active
chr1	88747551	88747614	region_820	Interzone_strong_active
chr1	88769794	88770009	region_821	Interzone_strong_active
chr1	89752824	89753000	region_822	Interzone_strong_active
chr1	90590345	90590674	region_823	Interzone_strong_active
chr1	90593122	90593456	region_824	Interzone_strong_active
chr1	90667339	90667817	region_825	Interzone_strong_active
chr1	90770008	90771508	region_826	Interzone_strong_active
chr1	90773222	90773548	region_827	Interzone_strong_active
chr1	91202838	91202854	region_828	Interzone_strong_active
chr1	92638284	92638342	region_829	Interzone_strong_active
chr1	92665356	92666037	region_830	Interzone_strong_active
chr1	92768664	92768720	region_831	Interzone_strong_active
chr1	92786422	92786544	region_832	Interzone_strong_active
chr1	92966347	92966575	region_833	Interzone_strong_active
chr1	93184829	93186423	region_834	Interzone_strong_active
chr1	93555855	93555938	region_835	Interzone_strong_active
chr1	93621354	93621888	region_836	Interzone_strong_active
chr1	93640367	93640481	region_837	Interzone_strong_active
chr1	93642258	93642532	region_838	Interzone_strong_active
chr1	93654120	93654273	region_839	Interzone_strong_active
chr1	93660504	93660916	region_840	Interzone_strong_active
chr1	93702197	93702351	region_841	Interzone_strong_active
chr1	93749405	93749965	region_842	Interzone_strong_active
chr1	93761291	93761355	region_843	Interzone_strong_active
chr1	93774301	93775438	region_844	Interzone_strong_active
chr1	93798896	93799307	region_845	Interzone_strong_active
chr1	93804051	93804518	region_846	Interzone_strong_active
chr1	93816529	93816578	region_847	Interzone_strong_active
chr1	93827319	93827400	region_848	Interzone_strong_active
chr1	95381064	95381186	region_849	Interzone_strong_active
chr1	97650799	97651182	region_850	Interzone_strong_active
chr1	97690426	97691951	region_851	Interzone_strong_active
chr1	97703449	97704668	region_852	Interzone_strong_active
chr1	97707608	97708019	region_853	Interzone_strong_active
chr1	97784764	97785391	region_854	Interzone_strong_active
chr1	97811246	97811588	region_855	Interzone_strong_active
chr1	97838236	97838585	region_856	Interzone_strong_active
chr1	97842830	97843552	region_857	Interzone_strong_active
chr1	97913144	97913180	region_858	Interzone_strong_active
chr1	97948257	97948479	region_859	Interzone_strong_active
chr1	97961905	97962219	region_860	Interzone_strong_active
chr1	97965169	97965394	region_861	Interzone_strong_active
chr1	98313987	98314720	region_862	Interzone_strong_active
chr1	98492930	98493261	region_863	Interzone_strong_active
chr1	98517896	98518219	region_864	Interzone_strong_active
chr1	98576103	98576591	region_865	Interzone_strong_active
chr1	98581084	98581608	region_866	Interzone_strong_active
chr1	98741044	98741447	region_867	Interzone_strong_active
chr1	98742779	98744706	region_868	Interzone_strong_active
chr1	98798283	98798384	region_869	Interzone_strong_active
chr1	98811831	98812251	region_870	Interzone_strong_active
chr1	99729780	99729882	region_871	Interzone_strong_active
chr1	99855869	99855950	region_872	Interzone_strong_active
chr1	100140435	100140612	region_873	Interzone_strong_active
chr1	100196753	100198118	region_874	Interzone_strong_active
chr1	100326796	100326857	region_875	Interzone_strong_active
chr1	100330094	100331102	region_876	Interzone_strong_active
chr1	100349144	100349509	region_877	Interzone_strong_active
chr1	100389546	100392309	region_878	Interzone_strong_active
chr1	100418348	100419096	region_879	Interzone_strong_active
chr1	100420402	100420611	region_880	Interzone_strong_active
chr1	100444181	100444705	region_881	Interzone_strong_active
chr1	100611474	100612213	region_882	Interzone_strong_active
chr1	103859437	103859592	region_883	Interzone_strong_active
chr1	103863600	103863794	region_884	Interzone_strong_active
chr1	103982736	103982985	region_885	Interzone_strong_active
chr1	104339025	104344909	region_886	Interzone_strong_active
chr1	104407062	104407556	region_887	Interzone_strong_active
chr1	104846216	104846441	region_888	Interzone_strong_active
chr1	104868276	104868470	region_889	Interzone_strong_active
chr1	104986623	104987270	region_890	Interzone_strong_active
chr1	105066178	105067028	region_891	Interzone_strong_active
chr1	105138998	105139510	region_892	Interzone_strong_active
chr1	105251565	105252050	region_893	Interzone_strong_active
chr1	105273183	105273662	region_894	Interzone_strong_active
chr1	105290271	105290678	region_895	Interzone_strong_active
chr1	105293760	105293995	region_896	Interzone_strong_active
chr1	105306143	105306877	region_897	Interzone_strong_active
chr1	105823572	105824120	region_898	Interzone_strong_active
chr1	105842192	105842290	region_899	Interzone_strong_active
chr1	105850593	105850793	region_900	Interzone_strong_active
chr1	105855151	105855395	region_901	Interzone_strong_active
chr1	105856758	105858047	region_902	Interzone_strong_active
chr1	105889973	105891029	region_903	Interzone_strong_active
chr1	105932653	105932845	region_904	Interzone_strong_active
chr1	105953726	105954686	region_905	Interzone_strong_active
chr1	105978174	105978953	region_906	Interzone_strong_active
chr1	105996433	105996529	region_907	Interzone_strong_active
chr1	105998674	105998810	region_908	Interzone_strong_active
chr1	106002742	106004349	region_909	Interzone_strong_active
chr1	106035287	106035458	region_910	Interzone_strong_active
chr1	106178781	106178830	region_911	Interzone_strong_active
chr1	106267326	106267430	region_912	Interzone_strong_active
chr1	106345642	106345736	region_913	Interzone_strong_active
chr1	106350102	106350839	region_914	Interzone_strong_active
chr1	106411920	106412182	region_915	Interzone_strong_active
chr1	106926350	106926519	region_916	Interzone_strong_active
chr1	106991254	106991437	region_917	Interzone_strong_active
chr1	107258444	107258676	region_918	Interzone_strong_active
chr1	107260734	107261360	region_919	Interzone_strong_active
chr1	107372581	107372959	region_920	Interzone_strong_active
chr1	107389786	107390244	region_921	Interzone_strong_active
chr1	107395673	107396086	region_922	Interzone_strong_active
chr1	107416135	107416705	region_923	Interzone_strong_active
chr1	107424875	107425985	region_924	Interzone_strong_active
chr1	107812040	107812547	region_925	Interzone_strong_active
chr1	108009472	108009614	region_926	Interzone_strong_active
chr1	108011224	108013343	region_927	Interzone_strong_active
chr1	108016047	108016464	region_928	Interzone_strong_active
chr1	108317648	108318074	region_929	Interzone_strong_active
chr1	108441390	108443457	region_930	Interzone_strong_active
chr1	108919154	108919170	region_931	Interzone_strong_active
chr1	108991191	108991453	region_932	Interzone_strong_active
chr1	109044784	109045036	region_933	Interzone_strong_active
chr1	109047274	109047553	region_934	Interzone_strong_active
chr1	109055586	109055919	region_935	Interzone_strong_active
chr1	109059835	109061411	region_936	Interzone_strong_active
chr1	109068091	109068797	region_937	Interzone_strong_active
chr1	109134641	109135744	region_938	Interzone_strong_active
chr1	109145186	109145748	region_939	Interzone_strong_active
chr1	109181648	109182026	region_940	Interzone_strong_active
chr1	109230754	109230843	region_941	Interzone_strong_active
chr1	109236682	109237050	region_942	Interzone_strong_active
chr1	109247944	109248796	region_943	Interzone_strong_active
chr1	109818681	109819266	region_944	Interzone_strong_active
chr1	110459936	110460751	region_945	Interzone_strong_active
chr1	110486421	110487183	region_946	Interzone_strong_active
chr1	110632222	110632366	region_947	Interzone_strong_active
chr1	110917330	110917598	region_948	Interzone_strong_active
chr1	110980696	110980858	region_949	Interzone_strong_active
chr1	110983233	110984912	region_950	Interzone_strong_active
chr1	110986363	110986667	region_951	Interzone_strong_active
chr1	111049229	111049279	region_952	Interzone_strong_active
chr1	111056096	111056254	region_953	Interzone_strong_active
chr1	111221909	111221949	region_954	Interzone_strong_active
chr1	111619793	111620312	region_955	Interzone_strong_active
chr1	111945719	111946079	region_956	Interzone_strong_active
chr1	111962676	111963134	region_957	Interzone_strong_active
chr1	111993299	111993538	region_958	Interzone_strong_active
chr1	112295474	112295635	region_959	Interzone_strong_active
chr1	112297831	112298029	region_960	Interzone_strong_active
chr1	113270273	113270432	region_961	Interzone_strong_active
chr1	113271453	113271856	region_962	Interzone_strong_active
chr1	113289017	113289325	region_963	Interzone_strong_active
chr1	113340736	113341947	region_964	Interzone_strong_active
chr1	113344832	113345118	region_965	Interzone_strong_active
chr1	113372492	113373315	region_966	Interzone_strong_active
chr1	113481463	113482760	region_967	Interzone_strong_active
chr1	113533023	113533850	region_968	Interzone_strong_active
chr1	113585668	113585851	region_969	Interzone_strong_active
chr1	113666859	113669189	region_970	Interzone_strong_active
chr1	113680072	113681231	region_971	Interzone_strong_active
chr1	113684641	113687718	region_972	Interzone_strong_active
chr1	113693058	113695716	region_973	Interzone_strong_active
chr1	113699778	113700567	region_974	Interzone_strong_active
chr1	113720206	113720908	region_975	Interzone_strong_active
chr1	113888728	113888983	region_976	Interzone_strong_active
chr1	114092512	114092765	region_977	Interzone_strong_active
chr1	114443327	114443514	region_978	Interzone_strong_active
chr1	115290575	115290868	region_979	Interzone_strong_active
chr1	115986989	115987363	region_980	Interzone_strong_active
chr1	116204603	116204795	region_981	Interzone_strong_active
chr1	116274143	116274790	region_982	Interzone_strong_active
chr1	116382211	116383084	region_983	Interzone_strong_active
chr1	117188429	117188895	region_984	Interzone_strong_active
chr1	118227922	118228093	region_985	Interzone_strong_active
chr1	118766826	118766888	region_986	Interzone_strong_active
chr1	119384151	119384322	region_987	Interzone_strong_active
chr1	119433113	119433431	region_988	Interzone_strong_active
chr1	119463714	119463868	region_989	Interzone_strong_active
chr1	119478976	119479158	region_990	Interzone_strong_active
chr1	119610227	119610716	region_991	Interzone_strong_active
chr1	119614588	119615231	region_992	Interzone_strong_active
chr1	119636334	119636936	region_993	Interzone_strong_active
chr1	119746937	119748728	region_994	Interzone_strong_active
chr1	119781414	119781612	region_995	Interzone_strong_active
chr1	119785498	119785792	region_996	Interzone_strong_active
chr1	119865959	119866794	region_997	Interzone_strong_active
chr1	119891099	119891309	region_998	Interzone_strong_active
chr1	120500654	120501031	region_999	Interzone_strong_active
chr1	120502707	120503076	region_1000	Interzone_strong_active
chr1	120783613	120784218	region_1001	Interzone_strong_active
chr1	121018741	121019000	region_1002	Interzone_strong_active
chr1	121719488	121719777	region_1003	Interzone_strong_active
chr1	122041737	122042726	region_1004	Interzone_strong_active
chr1	122132328	122132618	region_1005	Interzone_strong_active
chr1	122133752	122134469	region_1006	Interzone_strong_active
chr1	122257274	122257539	region_1007	Interzone_strong_active
chr1	122595951	122596163	region_1008	Interzone_strong_active
chr1	122701631	122701833	region_1009	Interzone_strong_active
chr1	122760825	122761604	region_1010	Interzone_strong_active
chr1	122802404	122803246	region_1011	Interzone_strong_active
chr1	123292203	123292267	region_1012	Interzone_strong_active
chr1	123715074	123715180	region_1013	Interzone_strong_active
chr1	124223100	124223235	region_1014	Interzone_strong_active
chr1	124291364	124291726	region_1015	Interzone_strong_active
chr1	124546004	124546125	region_1016	Interzone_strong_active
chr1	125705703	125705891	region_1017	Interzone_strong_active
chr1	125720887	125721199	region_1018	Interzone_strong_active
chr1	125750474	125751105	region_1019	Interzone_strong_active
chr1	125864715	125864728	region_1020	Interzone_strong_active
chr1	125952336	125952630	region_1021	Interzone_strong_active
chr1	125960918	125961713	region_1022	Interzone_strong_active
chr1	125965677	125965724	region_1023	Interzone_strong_active
chr1	126002083	126002507	region_1024	Interzone_strong_active
chr1	126072193	126073144	region_1025	Interzone_strong_active
chr1	126267025	126267255	region_1026	Interzone_strong_active
chr1	126289742	126289822	region_1027	Interzone_strong_active
chr1	126421501	126421711	region_1028	Interzone_strong_active
chr1	126431161	126431318	region_1029	Interzone_strong_active
chr1	126520257	126520383	region_1030	Interzone_strong_active
chr1	126522732	126522848	region_1031	Interzone_strong_active
chr1	126557034	126557188	region_1032	Interzone_strong_active
chr1	126582428	126582605	region_1033	Interzone_strong_active
chr1	126843611	126843986	region_1034	Interzone_strong_active
chr1	129625781	129626197	region_1035	Interzone_strong_active
chr1	129631965	129632624	region_1036	Interzone_strong_active
chr1	130349475	130349865	region_1037	Interzone_strong_active
chr1	130454468	130455844	region_1038	Interzone_strong_active
chr1	131436499	131437895	region_1039	Interzone_strong_active
chr1	131451195	131451273	region_1040	Interzone_strong_active
chr1	131595800	131595801	region_1041	Interzone_strong_active
chr1	131655756	131656121	region_1042	Interzone_strong_active
chr1	131662269	131662384	region_1043	Interzone_strong_active
chr1	131742512	131743870	region_1044	Interzone_strong_active
chr1	131772683	131772788	region_1045	Interzone_strong_active
chr1	133029201	133029278	region_1046	Interzone_strong_active
chr1	133087273	133087429	region_1047	Interzone_strong_active
chr1	133611652	133611792	region_1048	Interzone_strong_active
chr1	133633912	133634166	region_1049	Interzone_strong_active
chr1	133689822	133689871	region_1050	Interzone_strong_active
chr1	133888870	133890357	region_1051	Interzone_strong_active
chr1	133980509	133980637	region_1052	Interzone_strong_active
chr1	133982655	133982946	region_1053	Interzone_strong_active
chr1	133985160	133985203	region_1054	Interzone_strong_active
chr1	134043120	134043913	region_1055	Interzone_strong_active
chr1	134046583	134046594	region_1056	Interzone_strong_active
chr1	134055736	134056974	region_1057	Interzone_strong_active
chr1	134059297	134059416	region_1058	Interzone_strong_active
chr1	134076562	134076814	region_1059	Interzone_strong_active
chr1	134080504	134081880	region_1060	Interzone_strong_active
chr1	134272130	134272227	region_1061	Interzone_strong_active
chr1	134321694	134321812	region_1062	Interzone_strong_active
chr1	134365069	134365305	region_1063	Interzone_strong_active
chr1	134465222	134465311	region_1064	Interzone_strong_active
chr1	134570135	134571258	region_1065	Interzone_strong_active
chr1	134655331	134655394	region_1066	Interzone_strong_active
chr1	134673086	134673341	region_1067	Interzone_strong_active
chr1	134985673	134987433	region_1068	Interzone_strong_active
chr1	134996809	134997043	region_1069	Interzone_strong_active
chr1	135009936	135010293	region_1070	Interzone_strong_active
chr1	135032152	135032247	region_1071	Interzone_strong_active
chr1	135520546	135520566	region_1072	Interzone_strong_active
chr1	135717425	135718154	region_1073	Interzone_strong_active
chr1	135877292	135877988	region_1074	Interzone_strong_active
chr1	136425061	136425409	region_1075	Interzone_strong_active
chr1	136719010	136719211	region_1076	Interzone_strong_active
chr1	136720669	136720856	region_1077	Interzone_strong_active
chr1	136735336	136735410	region_1078	Interzone_strong_active
chr1	136766447	136766542	region_1079	Interzone_strong_active
chr1	136974233	136975254	region_1080	Interzone_strong_active
chr1	136987403	136987991	region_1081	Interzone_strong_active
chr1	137188895	137189135	region_1082	Interzone_strong_active
chr1	137297731	137298384	region_1083	Interzone_strong_active
chr1	137303375	137303550	region_1084	Interzone_strong_active
chr1	137312258	137312470	region_1085	Interzone_strong_active
chr1	137362870	137363036	region_1086	Interzone_strong_active
chr1	137428518	137428606	region_1087	Interzone_strong_active
chr1	137561136	137561523	region_1088	Interzone_strong_active
chr1	137665126	137665728	region_1089	Interzone_strong_active
chr1	137878131	137878161	region_1090	Interzone_strong_active
chr1	137886588	137886646	region_1091	Interzone_strong_active
chr1	138246399	138246485	region_1092	Interzone_strong_active
chr1	138280637	138281417	region_1093	Interzone_strong_active
chr1	138302578	138302641	region_1094	Interzone_strong_active
chr1	138455590	138455699	region_1095	Interzone_strong_active
chr1	138464392	138465133	region_1096	Interzone_strong_active
chr1	138689035	138689267	region_1097	Interzone_strong_active
chr1	139230239	139231076	region_1098	Interzone_strong_active
chr1	139953874	139953998	region_1099	Interzone_strong_active
chr1	139994816	139996482	region_1100	Interzone_strong_active
chr1	140389517	140389989	region_1101	Interzone_strong_active
chr1	140418062	140418502	region_1102	Interzone_strong_active
chr1	140454944	140455309	region_1103	Interzone_strong_active
chr1	140461504	140461606	region_1104	Interzone_strong_active
chr1	140515795	140515957	region_1105	Interzone_strong_active
chr1	140539760	140540074	region_1106	Interzone_strong_active
chr1	140550364	140551011	region_1107	Interzone_strong_active
chr1	140655943	140656387	region_1108	Interzone_strong_active
chr1	140716935	140717134	region_1109	Interzone_strong_active
chr1	140728187	140728281	region_1110	Interzone_strong_active
chr1	140943195	140944703	region_1111	Interzone_strong_active
chr1	143270456	143271193	region_1112	Interzone_strong_active
chr1	143292853	143292902	region_1113	Interzone_strong_active
chr1	143877806	143877992	region_1114	Interzone_strong_active
chr1	144224874	144225408	region_1115	Interzone_strong_active
chr1	144791642	144792049	region_1116	Interzone_strong_active
chr1	144794465	144795389	region_1117	Interzone_strong_active
chr1	145534731	145535060	region_1118	Interzone_strong_active
chr1	145605381	145605437	region_1119	Interzone_strong_active
chr1	145718058	145719955	region_1120	Interzone_strong_active
chr1	146080067	146080608	region_1121	Interzone_strong_active
chr1	146325192	146325299	region_1122	Interzone_strong_active
chr1	146347793	146347890	region_1123	Interzone_strong_active
chr1	146349911	146349933	region_1124	Interzone_strong_active
chr1	146354578	146354793	region_1125	Interzone_strong_active
chr1	146362640	146362816	region_1126	Interzone_strong_active
chr1	146364917	146365029	region_1127	Interzone_strong_active
chr1	146382914	146383846	region_1128	Interzone_strong_active
chr1	146402689	146402828	region_1129	Interzone_strong_active
chr1	146476862	146477251	region_1130	Interzone_strong_active
chr1	146498053	146498161	region_1131	Interzone_strong_active
chr1	146778032	146778280	region_1132	Interzone_strong_active
chr1	146779673	146779727	region_1133	Interzone_strong_active
chr1	146782505	146783809	region_1134	Interzone_strong_active
chr1	146788816	146789118	region_1135	Interzone_strong_active
chr1	146792605	146792889	region_1136	Interzone_strong_active
chr1	147773325	147773666	region_1137	Interzone_strong_active
chr1	147787703	147788280	region_1138	Interzone_strong_active
chr1	147879394	147879410	region_1139	Interzone_strong_active
chr1	147917235	147917668	region_1140	Interzone_strong_active
chr1	149442014	149442703	region_1141	Interzone_strong_active
chr1	150819375	150819675	region_1142	Interzone_strong_active
chr1	153959168	153959755	region_1143	Interzone_strong_active
chr1	154046645	154047680	region_1144	Interzone_strong_active
chr1	154054352	154054390	region_1145	Interzone_strong_active
chr1	154058885	154059696	region_1146	Interzone_strong_active
chr1	154060726	154061387	region_1147	Interzone_strong_active
chr1	154253911	154254395	region_1148	Interzone_strong_active
chr1	154255906	154257247	region_1149	Interzone_strong_active
chr1	154259911	154260228	region_1150	Interzone_strong_active
chr1	154262951	154264100	region_1151	Interzone_strong_active
chr1	154269269	154269553	region_1152	Interzone_strong_active
chr1	154337007	154337804	region_1153	Interzone_strong_active
chr1	154349663	154349870	region_1154	Interzone_strong_active
chr1	154421234	154421449	region_1155	Interzone_strong_active
chr1	154422776	154422975	region_1156	Interzone_strong_active
chr1	155792450	155792555	region_1157	Interzone_strong_active
chr1	155848145	155848341	region_1158	Interzone_strong_active
chr1	155901113	155901221	region_1159	Interzone_strong_active
chr1	156067139	156067875	region_1160	Interzone_strong_active
chr1	156274860	156274989	region_1161	Interzone_strong_active
chr1	156313233	156313701	region_1162	Interzone_strong_active
chr1	156454827	156455752	region_1163	Interzone_strong_active
chr1	157013732	157013787	region_1164	Interzone_strong_active
chr1	157143420	157144034	region_1165	Interzone_strong_active
chr1	157153727	157154088	region_1166	Interzone_strong_active
chr1	157173339	157173641	region_1167	Interzone_strong_active
chr1	157174701	157175063	region_1168	Interzone_strong_active
chr1	157185898	157186260	region_1169	Interzone_strong_active
chr1	157214415	157214974	region_1170	Interzone_strong_active
chr1	157236983	157237206	region_1171	Interzone_strong_active
chr1	157305408	157305828	region_1172	Interzone_strong_active
chr1	157439365	157439559	region_1173	Interzone_strong_active
chr1	157443188	157443765	region_1174	Interzone_strong_active
chr1	157470007	157470245	region_1175	Interzone_strong_active
chr1	157509948	157510676	region_1176	Interzone_strong_active
chr1	157552084	157552421	region_1177	Interzone_strong_active
chr1	157588684	157588897	region_1178	Interzone_strong_active
chr1	157639539	157640045	region_1179	Interzone_strong_active
chr1	157673264	157674218	region_1180	Interzone_strong_active
chr1	158038870	158039453	region_1181	Interzone_strong_active
chr1	158127765	158129287	region_1182	Interzone_strong_active
chr1	158158942	158159132	region_1183	Interzone_strong_active
chr1	160444689	160445585	region_1184	Interzone_strong_active
chr1	160549553	160549804	region_1185	Interzone_strong_active
chr1	163202123	163203301	region_1186	Interzone_strong_active
chr1	163204628	163205080	region_1187	Interzone_strong_active
chr1	163661075	163661171	region_1188	Interzone_strong_active
chr1	164865353	164865561	region_1189	Interzone_strong_active
chr1	166902866	166903161	region_1190	Interzone_strong_active
chr1	167044083	167044249	region_1191	Interzone_strong_active
chr1	167051230	167051649	region_1192	Interzone_strong_active
chr1	167121957	167122134	region_1193	Interzone_strong_active
chr1	167128941	167129192	region_1194	Interzone_strong_active
chr1	167176049	167176161	region_1195	Interzone_strong_active
chr1	167196381	167196468	region_1196	Interzone_strong_active
chr1	167337377	167337714	region_1197	Interzone_strong_active
chr1	167381748	167382145	region_1198	Interzone_strong_active
chr1	167450362	167450589	region_1199	Interzone_strong_active
chr1	167492977	167493105	region_1200	Interzone_strong_active
chr1	167691774	167692298	region_1201	Interzone_strong_active
chr1	168070986	168071130	region_1202	Interzone_strong_active
chr1	168476993	168477646	region_1203	Interzone_strong_active
chr1	168568038	168568365	region_1204	Interzone_strong_active
chr1	168640721	168641007	region_1205	Interzone_strong_active
chr1	168740679	168741747	region_1206	Interzone_strong_active
chr1	168815623	168816673	region_1207	Interzone_strong_active
chr1	169086951	169087678	region_1208	Interzone_strong_active
chr1	169103592	169103666	region_1209	Interzone_strong_active
chr1	169653535	169653986	region_1210	Interzone_strong_active
chr1	169997081	169997864	region_1211	Interzone_strong_active
chr1	170163312	170163562	region_1212	Interzone_strong_active
chr1	170378532	170378575	region_1213	Interzone_strong_active
chr1	170401931	170402878	region_1214	Interzone_strong_active
chr1	170435739	170436198	region_1215	Interzone_strong_active
chr1	170509901	170510995	region_1216	Interzone_strong_active
chr1	170545004	170545136	region_1217	Interzone_strong_active
chr1	170566530	170566628	region_1218	Interzone_strong_active
chr1	170682804	170683745	region_1219	Interzone_strong_active
chr1	170786363	170787483	region_1220	Interzone_strong_active
chr1	171111560	171112305	region_1221	Interzone_strong_active
chr1	171151608	171151992	region_1222	Interzone_strong_active
chr1	171236055	171236179	region_1223	Interzone_strong_active
chr1	171247056	171247186	region_1224	Interzone_strong_active
chr1	171250871	171252000	region_1225	Interzone_strong_active
chr1	171256712	171256713	region_1226	Interzone_strong_active
chr1	171457644	171458383	region_1227	Interzone_strong_active
chr1	171513339	171513359	region_1228	Interzone_strong_active
chr1	171717761	171717930	region_1229	Interzone_strong_active
chr1	171736223	171736351	region_1230	Interzone_strong_active
chr1	171776502	171776684	region_1231	Interzone_strong_active
chr1	171919117	171919681	region_1232	Interzone_strong_active
chr1	171956005	171956204	region_1233	Interzone_strong_active
chr1	172100665	172100957	region_1234	Interzone_strong_active
chr1	173374508	173374633	region_1235	Interzone_strong_active
chr1	174249083	174250523	region_1236	Interzone_strong_active
chr1	174255482	174258679	region_1237	Interzone_strong_active
chr1	174260421	174260559	region_1238	Interzone_strong_active
chr1	174263903	174264213	region_1239	Interzone_strong_active
chr1	174267465	174269196	region_1240	Interzone_strong_active
chr1	174282574	174283033	region_1241	Interzone_strong_active
chr1	174300203	174302745	region_1242	Interzone_strong_active
chr1	174311025	174311363	region_1243	Interzone_strong_active
chr1	174316255	174316453	region_1244	Interzone_strong_active
chr1	174487208	174488724	region_1245	Interzone_strong_active
chr1	174518332	174518791	region_1246	Interzone_strong_active
chr1	174521842	174522642	region_1247	Interzone_strong_active
chr1	174523989	174524390	region_1248	Interzone_strong_active
chr1	174559206	174559477	region_1249	Interzone_strong_active
chr1	174842634	174842876	region_1250	Interzone_strong_active
chr1	175238774	175238874	region_1251	Interzone_strong_active
chr1	175339649	175340356	region_1252	Interzone_strong_active
chr1	175425577	175426014	region_1253	Interzone_strong_active
chr1	175450323	175451010	region_1254	Interzone_strong_active
chr1	175459838	175460131	region_1255	Interzone_strong_active
chr1	175474857	175475152	region_1256	Interzone_strong_active
chr1	175495161	175497081	region_1257	Interzone_strong_active
chr1	175501682	175502974	region_1258	Interzone_strong_active
chr1	175532650	175532763	region_1259	Interzone_strong_active
chr1	175561374	175561489	region_1260	Interzone_strong_active
chr1	175940023	175940073	region_1261	Interzone_strong_active
chr1	175965612	175965781	region_1262	Interzone_strong_active
chr1	175975136	175975693	region_1263	Interzone_strong_active
chr1	176025721	176026046	region_1264	Interzone_strong_active
chr1	176054086	176054355	region_1265	Interzone_strong_active
chr1	176132195	176133051	region_1266	Interzone_strong_active
chr1	176418886	176418974	region_1267	Interzone_strong_active
chr1	176491164	176495609	region_1268	Interzone_strong_active
chr1	176556996	176557363	region_1269	Interzone_strong_active
chr1	176568972	176569634	region_1270	Interzone_strong_active
chr1	177348095	177349028	region_1271	Interzone_strong_active
chr1	177382186	177382382	region_1272	Interzone_strong_active
chr1	177490507	177490609	region_1273	Interzone_strong_active
chr1	177549206	177549507	region_1274	Interzone_strong_active
chr1	177550926	177551192	region_1275	Interzone_strong_active
chr1	177553102	177553280	region_1276	Interzone_strong_active
chr1	177555399	177555672	region_1277	Interzone_strong_active
chr1	177557677	177557854	region_1278	Interzone_strong_active
chr1	177598166	177598267	region_1279	Interzone_strong_active
chr1	178255379	178255960	region_1280	Interzone_strong_active
chr1	178270983	178271135	region_1281	Interzone_strong_active
chr1	178272209	178272256	region_1282	Interzone_strong_active
chr1	178283036	178283237	region_1283	Interzone_strong_active
chr1	178297524	178297770	region_1284	Interzone_strong_active
chr1	178318372	178318533	region_1285	Interzone_strong_active
chr1	178321947	178322378	region_1286	Interzone_strong_active
chr1	178327567	178327625	region_1287	Interzone_strong_active
chr1	178362068	178362721	region_1288	Interzone_strong_active
chr1	178375012	178376479	region_1289	Interzone_strong_active
chr1	178384230	178385012	region_1290	Interzone_strong_active
chr1	178683410	178685148	region_1291	Interzone_strong_active
chr1	178738989	178739179	region_1292	Interzone_strong_active
chr1	178749615	178749850	region_1293	Interzone_strong_active
chr1	178770110	178770726	region_1294	Interzone_strong_active
chr1	178777053	178777352	region_1295	Interzone_strong_active
chr1	178781903	178782038	region_1296	Interzone_strong_active
chr1	178791061	178791283	region_1297	Interzone_strong_active
chr1	178794280	178794608	region_1298	Interzone_strong_active
chr1	178803478	178803865	region_1299	Interzone_strong_active
chr1	178951934	178952392	region_1300	Interzone_strong_active
chr1	179271275	179271858	region_1301	Interzone_strong_active
chr1	179379400	179379746	region_1302	Interzone_strong_active
chr1	179715489	179716386	region_1303	Interzone_strong_active
chr1	179904576	179904873	region_1304	Interzone_strong_active
chr1	179932698	179932772	region_1305	Interzone_strong_active
chr1	179948156	179948345	region_1306	Interzone_strong_active
chr1	179976207	179977219	region_1307	Interzone_strong_active
chr1	180007617	180007855	region_1308	Interzone_strong_active
chr1	180062663	180062842	region_1309	Interzone_strong_active
chr1	180107526	180108488	region_1310	Interzone_strong_active
chr1	180145764	180146542	region_1311	Interzone_strong_active
chr1	180153824	180154010	region_1312	Interzone_strong_active
chr1	180158081	180158084	region_1313	Interzone_strong_active
chr1	180488189	180488821	region_1314	Interzone_strong_active
chr1	180550410	180552070	region_1315	Interzone_strong_active
chr1	180554934	180555094	region_1316	Interzone_strong_active
chr1	180556636	180557663	region_1317	Interzone_strong_active
chr1	180859852	180859960	region_1318	Interzone_strong_active
chr1	180866308	180866550	region_1319	Interzone_strong_active
chr1	180871616	180871917	region_1320	Interzone_strong_active
chr1	180880750	180882158	region_1321	Interzone_strong_active
chr1	180908350	180908737	region_1322	Interzone_strong_active
chr1	181553685	181554099	region_1323	Interzone_strong_active
chr1	181719926	181720675	region_1324	Interzone_strong_active
chr1	183315271	183315709	region_1325	Interzone_strong_active
chr1	183362834	183363004	region_1326	Interzone_strong_active
chr1	184002303	184004900	region_1327	Interzone_strong_active
chr1	184051880	184052285	region_1328	Interzone_strong_active
chr1	184053879	184054181	region_1329	Interzone_strong_active
chr1	186249744	186249972	region_1330	Interzone_strong_active
chr1	186266456	186266971	region_1331	Interzone_strong_active
chr1	186296457	186296592	region_1332	Interzone_strong_active
chr1	186305892	186306892	region_1333	Interzone_strong_active
chr1	186341860	186342148	region_1334	Interzone_strong_active
chr1	186375279	186375512	region_1335	Interzone_strong_active
chr1	186445295	186445522	region_1336	Interzone_strong_active
chr1	186447521	186447750	region_1337	Interzone_strong_active
chr1	186458959	186460042	region_1338	Interzone_strong_active
chr1	186477708	186478163	region_1339	Interzone_strong_active
chr1	186532965	186533291	region_1340	Interzone_strong_active
chr1	186557185	186557319	region_1341	Interzone_strong_active
chr1	186566377	186568097	region_1342	Interzone_strong_active
chr1	186634063	186634379	region_1343	Interzone_strong_active
chr1	186748906	186749475	region_1344	Interzone_strong_active
chr1	186753826	186754029	region_1345	Interzone_strong_active
chr1	186815593	186815873	region_1346	Interzone_strong_active
chr1	186835379	186836846	region_1347	Interzone_strong_active
chr1	186843434	186843767	region_1348	Interzone_strong_active
chr1	186864052	186864429	region_1349	Interzone_strong_active
chr1	186915189	186915265	region_1350	Interzone_strong_active
chr1	186936731	186936889	region_1351	Interzone_strong_active
chr1	187104701	187105725	region_1352	Interzone_strong_active
chr1	187116632	187116831	region_1353	Interzone_strong_active
chr1	189846827	189847989	region_1354	Interzone_strong_active
chr1	189849145	189849310	region_1355	Interzone_strong_active
chr1	189850751	189850816	region_1356	Interzone_strong_active
chr1	190014137	190017102	region_1357	Interzone_strong_active
chr1	190018486	190018773	region_1358	Interzone_strong_active
chr1	190241397	190241526	region_1359	Interzone_strong_active
chr1	190277968	190278075	region_1360	Interzone_strong_active
chr1	190280838	190282394	region_1361	Interzone_strong_active
chr1	190284817	190285066	region_1362	Interzone_strong_active
chr1	190289480	190290013	region_1363	Interzone_strong_active
chr1	190348399	190348710	region_1364	Interzone_strong_active
chr1	190351937	190352103	region_1365	Interzone_strong_active
chr1	190353549	190353802	region_1366	Interzone_strong_active
chr1	190409020	190410130	region_1367	Interzone_strong_active
chr1	190411277	190411780	region_1368	Interzone_strong_active
chr1	190442724	190443688	region_1369	Interzone_strong_active
chr1	191270782	191273678	region_1370	Interzone_strong_active
chr1	191381764	191383573	region_1371	Interzone_strong_active
chr1	191546316	191548010	region_1372	Interzone_strong_active
chr1	191634007	191634403	region_1373	Interzone_strong_active
chr1	191637757	191637783	region_1374	Interzone_strong_active
chr1	191773145	191773286	region_1375	Interzone_strong_active
chr1	191774633	191774852	region_1376	Interzone_strong_active
chr1	193208110	193208520	region_1377	Interzone_strong_active
chr1	193293718	193294484	region_1378	Interzone_strong_active
chr1	193548039	193548357	region_1379	Interzone_strong_active
chr1	193555268	193555513	region_1380	Interzone_strong_active
chr1	193561946	193562241	region_1381	Interzone_strong_active
chr1	193635459	193636685	region_1382	Interzone_strong_active
chr1	193662139	193662689	region_1383	Interzone_strong_active
chr1	194332922	194332987	region_1384	Interzone_strong_active
chr1	194367921	194368086	region_1385	Interzone_strong_active
chr1	194376064	194376408	region_1386	Interzone_strong_active
chr1	194524050	194524199	region_1387	Interzone_strong_active
chr1	194527693	194527824	region_1388	Interzone_strong_active
chr1	194534904	194535304	region_1389	Interzone_strong_active
chr1	195162484	195162569	region_1390	Interzone_strong_active
chr1	195172494	195172596	region_1391	Interzone_strong_active
chr1	195211586	195211782	region_1392	Interzone_strong_active
chr1	195490698	195491361	region_1393	Interzone_strong_active
chr1	195497924	195498371	region_1394	Interzone_strong_active
chr1	195564357	195564609	region_1395	Interzone_strong_active
chr1	195603601	195603762	region_1396	Interzone_strong_active
chr1	195607988	195608250	region_1397	Interzone_strong_active
chr1	195616093	195617108	region_1398	Interzone_strong_active
chr1	195623209	195623340	region_1399	Interzone_strong_active
chr1	195739920	195740115	region_1400	Interzone_strong_active
chr1	195861756	195861782	region_1401	Interzone_strong_active
chr1	195902274	195902606	region_1402	Interzone_strong_active
chr1	195913757	195914417	region_1403	Interzone_strong_active
chr1	195929114	195929232	region_1404	Interzone_strong_active
chr1	196000572	196001324	region_1405	Interzone_strong_active
chr1	196006062	196006169	region_1406	Interzone_strong_active
chr1	196017279	196017508	region_1407	Interzone_strong_active
chr1	196021712	196022198	region_1408	Interzone_strong_active
chr1	196026948	196028031	region_1409	Interzone_strong_active
chr1	196030598	196030758	region_1410	Interzone_strong_active
chr1	196119889	196120951	region_1411	Interzone_strong_active
chr1	196228695	196229230	region_1412	Interzone_strong_active
chr1	196399865	196400255	region_1413	Interzone_strong_active
chr1	196425711	196426213	region_1414	Interzone_strong_active
chr1	196428087	196429333	region_1415	Interzone_strong_active
chr1	196437213	196440307	region_1416	Interzone_strong_active
chr1	196441950	196442064	region_1417	Interzone_strong_active
chr1	196506818	196507161	region_1418	Interzone_strong_active
chr1	196550523	196551058	region_1419	Interzone_strong_active
chr1	196591218	196591373	region_1420	Interzone_strong_active
chr1	196594592	196594686	region_1421	Interzone_strong_active
chr1	196635794	196636050	region_1422	Interzone_strong_active
chr1	196639920	196640428	region_1423	Interzone_strong_active
chr1	196651448	196652303	region_1424	Interzone_strong_active
chr1	197039074	197039188	region_1425	Interzone_strong_active
chr1	197089954	197090285	region_1426	Interzone_strong_active
chr1	197094568	197095287	region_1427	Interzone_strong_active
chr1	197131535	197131601	region_1428	Interzone_strong_active
chr1	197302474	197302722	region_1429	Interzone_strong_active
chr1	197375883	197376113	region_1430	Interzone_strong_active
chr1	197385322	197385692	region_1431	Interzone_strong_active
chr1	197399847	197400125	region_1432	Interzone_strong_active
chr1	197402503	197403410	region_1433	Interzone_strong_active
chr1	197406383	197407885	region_1434	Interzone_strong_active
chr1	197418297	197420992	region_1435	Interzone_strong_active
chr1	197465973	197466203	region_1436	Interzone_strong_active
chr1	197469147	197471677	region_1437	Interzone_strong_active
chr1	197477218	197477566	region_1438	Interzone_strong_active
chr1	197479467	197479607	region_1439	Interzone_strong_active
chr1	197511779	197511833	region_1440	Interzone_strong_active
chr1	197524556	197525398	region_1441	Interzone_strong_active
chr1	197527708	197528613	region_1442	Interzone_strong_active
chr1	197534500	197535672	region_1443	Interzone_strong_active
chr10	536897	537654	region_1444	Interzone_strong_active
chr10	724679	724966	region_1445	Interzone_strong_active
chr10	1077762	1077807	region_1446	Interzone_strong_active
chr10	1082280	1082365	region_1447	Interzone_strong_active
chr10	1314409	1314768	region_1448	Interzone_strong_active
chr10	1317522	1317771	region_1449	Interzone_strong_active
chr10	1320481	1320499	region_1450	Interzone_strong_active
chr10	1321986	1323276	region_1451	Interzone_strong_active
chr10	1326516	1327505	region_1452	Interzone_strong_active
chr10	1357261	1357321	region_1453	Interzone_strong_active
chr10	1389949	1390025	region_1454	Interzone_strong_active
chr10	1554238	1555531	region_1455	Interzone_strong_active
chr10	1596763	1597030	region_1456	Interzone_strong_active
chr10	1600406	1601432	region_1457	Interzone_strong_active
chr10	1606062	1606368	region_1458	Interzone_strong_active
chr10	1615837	1616102	region_1459	Interzone_strong_active
chr10	1617325	1617540	region_1460	Interzone_strong_active
chr10	1629431	1629877	region_1461	Interzone_strong_active
chr10	1632554	1634433	region_1462	Interzone_strong_active
chr10	1642241	1642472	region_1463	Interzone_strong_active
chr10	1653096	1653454	region_1464	Interzone_strong_active
chr10	1668842	1669033	region_1465	Interzone_strong_active
chr10	1673850	1674622	region_1466	Interzone_strong_active
chr10	1713457	1713655	region_1467	Interzone_strong_active
chr10	1721608	1721709	region_1468	Interzone_strong_active
chr10	1742165	1742323	region_1469	Interzone_strong_active
chr10	1757655	1758120	region_1470	Interzone_strong_active
chr10	1763718	1763906	region_1471	Interzone_strong_active
chr10	1766624	1766829	region_1472	Interzone_strong_active
chr10	1774328	1775540	region_1473	Interzone_strong_active
chr10	1787085	1787228	region_1474	Interzone_strong_active
chr10	1794358	1795903	region_1475	Interzone_strong_active
chr10	1813157	1814040	region_1476	Interzone_strong_active
chr10	1818919	1819142	region_1477	Interzone_strong_active
chr10	1929664	1929806	region_1478	Interzone_strong_active
chr10	1946518	1946712	region_1479	Interzone_strong_active
chr10	1955205	1955341	region_1480	Interzone_strong_active
chr10	1965459	1965569	region_1481	Interzone_strong_active
chr10	1969295	1969466	region_1482	Interzone_strong_active
chr10	1991421	1992013	region_1483	Interzone_strong_active
chr10	2023416	2023620	region_1484	Interzone_strong_active
chr10	2034741	2034864	region_1485	Interzone_strong_active
chr10	2049075	2049341	region_1486	Interzone_strong_active
chr10	2071755	2072206	region_1487	Interzone_strong_active
chr10	2073395	2073417	region_1488	Interzone_strong_active
chr10	2135289	2135589	region_1489	Interzone_strong_active
chr10	2141079	2141249	region_1490	Interzone_strong_active
chr10	2167875	2167945	region_1491	Interzone_strong_active
chr10	2174492	2174664	region_1492	Interzone_strong_active
chr10	2186818	2187071	region_1493	Interzone_strong_active
chr10	2268422	2268773	region_1494	Interzone_strong_active
chr10	2306171	2306322	region_1495	Interzone_strong_active
chr10	2308531	2308669	region_1496	Interzone_strong_active
chr10	2375923	2376262	region_1497	Interzone_strong_active
chr10	2421785	2421791	region_1498	Interzone_strong_active
chr10	2427873	2429678	region_1499	Interzone_strong_active
chr10	2433356	2434470	region_1500	Interzone_strong_active
chr10	2440096	2440157	region_1501	Interzone_strong_active
chr10	2441473	2441478	region_1502	Interzone_strong_active
chr10	2444975	2445157	region_1503	Interzone_strong_active
chr10	2447610	2447744	region_1504	Interzone_strong_active
chr10	2457612	2457729	region_1505	Interzone_strong_active
chr10	2482945	2484482	region_1506	Interzone_strong_active
chr10	2640632	2640812	region_1507	Interzone_strong_active
chr10	2644235	2644544	region_1508	Interzone_strong_active
chr10	2647781	2647946	region_1509	Interzone_strong_active
chr10	2653385	2653576	region_1510	Interzone_strong_active
chr10	2654716	2654876	region_1511	Interzone_strong_active
chr10	2706369	2706533	region_1512	Interzone_strong_active
chr10	2709904	2710065	region_1513	Interzone_strong_active
chr10	2785586	2787954	region_1514	Interzone_strong_active
chr10	2888146	2889295	region_1515	Interzone_strong_active
chr10	2921378	2921639	region_1516	Interzone_strong_active
chr10	2923041	2924560	region_1517	Interzone_strong_active
chr10	2935663	2936143	region_1518	Interzone_strong_active
chr10	2942316	2942430	region_1519	Interzone_strong_active
chr10	2960145	2961107	region_1520	Interzone_strong_active
chr10	2963314	2963502	region_1521	Interzone_strong_active
chr10	2972719	2972942	region_1522	Interzone_strong_active
chr10	3005301	3006231	region_1523	Interzone_strong_active
chr10	3054205	3054501	region_1524	Interzone_strong_active
chr10	3069751	3070275	region_1525	Interzone_strong_active
chr10	3074809	3075294	region_1526	Interzone_strong_active
chr10	3089258	3090170	region_1527	Interzone_strong_active
chr10	3138051	3138847	region_1528	Interzone_strong_active
chr10	3140445	3141941	region_1529	Interzone_strong_active
chr10	3145247	3145596	region_1530	Interzone_strong_active
chr10	3155472	3155500	region_1531	Interzone_strong_active
chr10	3156584	3158468	region_1532	Interzone_strong_active
chr10	3160766	3161163	region_1533	Interzone_strong_active
chr10	3163714	3163957	region_1534	Interzone_strong_active
chr10	3165131	3165334	region_1535	Interzone_strong_active
chr10	3170207	3171425	region_1536	Interzone_strong_active
chr10	3174740	3175133	region_1537	Interzone_strong_active
chr10	3176895	3177539	region_1538	Interzone_strong_active
chr10	3187126	3187202	region_1539	Interzone_strong_active
chr10	3435339	3435432	region_1540	Interzone_strong_active
chr10	3520461	3521066	region_1541	Interzone_strong_active
chr10	3774497	3774709	region_1542	Interzone_strong_active
chr10	3835987	3836042	region_1543	Interzone_strong_active
chr10	3839027	3839980	region_1544	Interzone_strong_active
chr10	3846184	3846395	region_1545	Interzone_strong_active
chr10	3850845	3851028	region_1546	Interzone_strong_active
chr10	3951263	3951480	region_1547	Interzone_strong_active
chr10	3988097	3989107	region_1548	Interzone_strong_active
chr10	4101696	4101740	region_1549	Interzone_strong_active
chr10	4125215	4125355	region_1550	Interzone_strong_active
chr10	4158779	4158859	region_1551	Interzone_strong_active
chr10	4180859	4180910	region_1552	Interzone_strong_active
chr10	4191484	4193002	region_1553	Interzone_strong_active
chr10	4238831	4238967	region_1554	Interzone_strong_active
chr10	4286460	4287166	region_1555	Interzone_strong_active
chr10	4301416	4301466	region_1556	Interzone_strong_active
chr10	4483350	4483583	region_1557	Interzone_strong_active
chr10	4488782	4489060	region_1558	Interzone_strong_active
chr10	4490843	4491729	region_1559	Interzone_strong_active
chr10	4493092	4495016	region_1560	Interzone_strong_active
chr10	4503116	4503299	region_1561	Interzone_strong_active
chr10	4510245	4510349	region_1562	Interzone_strong_active
chr10	4553226	4553323	region_1563	Interzone_strong_active
chr10	4566431	4566855	region_1564	Interzone_strong_active
chr10	4617805	4618707	region_1565	Interzone_strong_active
chr10	4632785	4634813	region_1566	Interzone_strong_active
chr10	4726979	4727089	region_1567	Interzone_strong_active
chr10	4970731	4970945	region_1568	Interzone_strong_active
chr10	5139742	5140502	region_1569	Interzone_strong_active
chr10	5242900	5243593	region_1570	Interzone_strong_active
chr10	5255038	5255179	region_1571	Interzone_strong_active
chr10	5367363	5368206	region_1572	Interzone_strong_active
chr10	5382981	5383355	region_1573	Interzone_strong_active
chr10	5390118	5390406	region_1574	Interzone_strong_active
chr10	5422578	5423325	region_1575	Interzone_strong_active
chr10	5498583	5498792	region_1576	Interzone_strong_active
chr10	5499864	5501086	region_1577	Interzone_strong_active
chr10	5542704	5542861	region_1578	Interzone_strong_active
chr10	5547491	5547623	region_1579	Interzone_strong_active
chr10	5643644	5643952	region_1580	Interzone_strong_active
chr10	5844826	5844940	region_1581	Interzone_strong_active
chr10	6227963	6228946	region_1582	Interzone_strong_active
chr10	6236805	6237531	region_1583	Interzone_strong_active
chr10	6243878	6244383	region_1584	Interzone_strong_active
chr10	6372632	6372724	region_1585	Interzone_strong_active
chr10	6448578	6449486	region_1586	Interzone_strong_active
chr10	6543521	6543790	region_1587	Interzone_strong_active
chr10	6933493	6934055	region_1588	Interzone_strong_active
chr10	7036564	7036606	region_1589	Interzone_strong_active
chr10	7180813	7181091	region_1590	Interzone_strong_active
chr10	7235071	7235295	region_1591	Interzone_strong_active
chr10	7269692	7270576	region_1592	Interzone_strong_active
chr10	7576287	7576292	region_1593	Interzone_strong_active
chr10	7578259	7579224	region_1594	Interzone_strong_active
chr10	7589352	7590105	region_1595	Interzone_strong_active
chr10	7606375	7606506	region_1596	Interzone_strong_active
chr10	7621677	7622007	region_1597	Interzone_strong_active
chr10	7627610	7628088	region_1598	Interzone_strong_active
chr10	7683398	7683679	region_1599	Interzone_strong_active
chr10	7698519	7698574	region_1600	Interzone_strong_active
chr10	7771351	7771467	region_1601	Interzone_strong_active
chr10	7779787	7779978	region_1602	Interzone_strong_active
chr10	7857316	7857487	region_1603	Interzone_strong_active
chr10	7863533	7863925	region_1604	Interzone_strong_active
chr10	7868076	7871416	region_1605	Interzone_strong_active
chr10	7874964	7876190	region_1606	Interzone_strong_active
chr10	7877192	7878822	region_1607	Interzone_strong_active
chr10	7881802	7883353	region_1608	Interzone_strong_active
chr10	7885757	7886156	region_1609	Interzone_strong_active
chr10	7893585	7893783	region_1610	Interzone_strong_active
chr10	7894822	7895116	region_1611	Interzone_strong_active
chr10	7900077	7901104	region_1612	Interzone_strong_active
chr10	7904851	7905022	region_1613	Interzone_strong_active
chr10	7925407	7925428	region_1614	Interzone_strong_active
chr10	7929890	7930197	region_1615	Interzone_strong_active
chr10	7933521	7935648	region_1616	Interzone_strong_active
chr10	7955179	7955723	region_1617	Interzone_strong_active
chr10	7992311	7992531	region_1618	Interzone_strong_active
chr10	8003581	8004900	region_1619	Interzone_strong_active
chr10	8068609	8069331	region_1620	Interzone_strong_active
chr10	8118841	8118995	region_1621	Interzone_strong_active
chr10	8158208	8159046	region_1622	Interzone_strong_active
chr10	8161305	8161558	region_1623	Interzone_strong_active
chr10	8220176	8220311	region_1624	Interzone_strong_active
chr10	8226751	8231076	region_1625	Interzone_strong_active
chr10	8232113	8232127	region_1626	Interzone_strong_active
chr10	8434017	8434429	region_1627	Interzone_strong_active
chr10	9121144	9121651	region_1628	Interzone_strong_active
chr10	9159447	9159513	region_1629	Interzone_strong_active
chr10	9209070	9209073	region_1630	Interzone_strong_active
chr10	9215247	9215507	region_1631	Interzone_strong_active
chr10	9230072	9230160	region_1632	Interzone_strong_active
chr10	9358909	9359634	region_1633	Interzone_strong_active
chr10	9377414	9377939	region_1634	Interzone_strong_active
chr10	9498090	9498350	region_1635	Interzone_strong_active
chr10	9500037	9500261	region_1636	Interzone_strong_active
chr10	9578540	9578728	region_1637	Interzone_strong_active
chr10	9940354	9940965	region_1638	Interzone_strong_active
chr10	10151026	10151206	region_1639	Interzone_strong_active
chr10	10192921	10193740	region_1640	Interzone_strong_active
chr10	10339180	10339240	region_1641	Interzone_strong_active
chr10	10590949	10592253	region_1642	Interzone_strong_active
chr10	10601020	10601999	region_1643	Interzone_strong_active
chr10	10608550	10608796	region_1644	Interzone_strong_active
chr10	10718524	10719614	region_1645	Interzone_strong_active
chr10	10741720	10742208	region_1646	Interzone_strong_active
chr10	10831055	10831059	region_1647	Interzone_strong_active
chr10	10875405	10875987	region_1648	Interzone_strong_active
chr10	10987818	10987923	region_1649	Interzone_strong_active
chr10	11109507	11110681	region_1650	Interzone_strong_active
chr10	11168060	11168392	region_1651	Interzone_strong_active
chr10	11186753	11186941	region_1652	Interzone_strong_active
chr10	11188068	11188306	region_1653	Interzone_strong_active
chr10	11279977	11280553	region_1654	Interzone_strong_active
chr10	11335075	11336667	region_1655	Interzone_strong_active
chr10	11453936	11454179	region_1656	Interzone_strong_active
chr10	11696412	11696671	region_1657	Interzone_strong_active
chr10	11790982	11791622	region_1658	Interzone_strong_active
chr10	12009307	12009458	region_1659	Interzone_strong_active
chr10	12032724	12033140	region_1660	Interzone_strong_active
chr10	12105108	12105342	region_1661	Interzone_strong_active
chr10	12116854	12116863	region_1662	Interzone_strong_active
chr10	12211994	12215259	region_1663	Interzone_strong_active
chr10	12268914	12269453	region_1664	Interzone_strong_active
chr10	12275416	12275968	region_1665	Interzone_strong_active
chr10	12327282	12327603	region_1666	Interzone_strong_active
chr10	12385863	12385865	region_1667	Interzone_strong_active
chr10	12430473	12430991	region_1668	Interzone_strong_active
chr10	12447642	12448388	region_1669	Interzone_strong_active
chr10	12571908	12572026	region_1670	Interzone_strong_active
chr10	12581075	12581446	region_1671	Interzone_strong_active
chr10	12665194	12666015	region_1672	Interzone_strong_active
chr10	12680215	12680244	region_1673	Interzone_strong_active
chr10	12701050	12701203	region_1674	Interzone_strong_active
chr10	12777979	12778104	region_1675	Interzone_strong_active
chr10	12912107	12912365	region_1676	Interzone_strong_active
chr10	13049744	13050195	region_1677	Interzone_strong_active
chr10	13293952	13294210	region_1678	Interzone_strong_active
chr10	13392121	13392344	region_1679	Interzone_strong_active
chr10	13407019	13407851	region_1680	Interzone_strong_active
chr10	13415052	13415293	region_1681	Interzone_strong_active
chr10	13421085	13421383	region_1682	Interzone_strong_active
chr10	13423125	13423511	region_1683	Interzone_strong_active
chr10	13441026	13441220	region_1684	Interzone_strong_active
chr10	13442721	13442908	region_1685	Interzone_strong_active
chr10	13518740	13519082	region_1686	Interzone_strong_active
chr10	13529522	13529817	region_1687	Interzone_strong_active
chr10	13573609	13574795	region_1688	Interzone_strong_active
chr10	13589954	13590156	region_1689	Interzone_strong_active
chr10	13592549	13592550	region_1690	Interzone_strong_active
chr10	13613143	13613387	region_1691	Interzone_strong_active
chr10	13614604	13614819	region_1692	Interzone_strong_active
chr10	14443378	14443574	region_1693	Interzone_strong_active
chr10	14446170	14446294	region_1694	Interzone_strong_active
chr10	14459112	14459360	region_1695	Interzone_strong_active
chr10	14462581	14462781	region_1696	Interzone_strong_active
chr10	14465359	14465766	region_1697	Interzone_strong_active
chr10	14470470	14470659	region_1698	Interzone_strong_active
chr10	14471693	14471846	region_1699	Interzone_strong_active
chr10	14485768	14486228	region_1700	Interzone_strong_active
chr10	14506374	14506457	region_1701	Interzone_strong_active
chr10	14523337	14523595	region_1702	Interzone_strong_active
chr10	14533671	14534055	region_1703	Interzone_strong_active
chr10	14538060	14538178	region_1704	Interzone_strong_active
chr10	14972118	14972583	region_1705	Interzone_strong_active
chr10	14974635	14975248	region_1706	Interzone_strong_active
chr10	15046277	15046468	region_1707	Interzone_strong_active
chr10	15058980	15059492	region_1708	Interzone_strong_active
chr10	15062745	15063755	region_1709	Interzone_strong_active
chr10	15065816	15066240	region_1710	Interzone_strong_active
chr10	15078053	15078168	region_1711	Interzone_strong_active
chr10	15083486	15084635	region_1712	Interzone_strong_active
chr10	15109621	15109856	region_1713	Interzone_strong_active
chr10	15113638	15113893	region_1714	Interzone_strong_active
chr10	15115251	15115528	region_1715	Interzone_strong_active
chr10	15117531	15117971	region_1716	Interzone_strong_active
chr10	15120096	15120639	region_1717	Interzone_strong_active
chr10	15125318	15125658	region_1718	Interzone_strong_active
chr10	15128600	15131433	region_1719	Interzone_strong_active
chr10	15222459	15222788	region_1720	Interzone_strong_active
chr10	15333770	15333977	region_1721	Interzone_strong_active
chr10	15363717	15363901	region_1722	Interzone_strong_active
chr10	15390003	15390107	region_1723	Interzone_strong_active
chr10	15434972	15435490	region_1724	Interzone_strong_active
chr10	15437903	15439026	region_1725	Interzone_strong_active
chr10	15440126	15440265	region_1726	Interzone_strong_active
chr10	15443252	15443734	region_1727	Interzone_strong_active
chr10	15448139	15448991	region_1728	Interzone_strong_active
chr10	15456860	15458200	region_1729	Interzone_strong_active
chr10	15481815	15482364	region_1730	Interzone_strong_active
chr10	15485860	15488320	region_1731	Interzone_strong_active
chr10	15503517	15503728	region_1732	Interzone_strong_active
chr10	15507506	15508784	region_1733	Interzone_strong_active
chr10	15516337	15517107	region_1734	Interzone_strong_active
chr10	15519724	15519799	region_1735	Interzone_strong_active
chr10	15525866	15526368	region_1736	Interzone_strong_active
chr10	15531690	15532472	region_1737	Interzone_strong_active
chr10	15552614	15553286	region_1738	Interzone_strong_active
chr10	15573885	15574283	region_1739	Interzone_strong_active
chr10	15581134	15581430	region_1740	Interzone_strong_active
chr10	15598164	15598414	region_1741	Interzone_strong_active
chr10	15603606	15603696	region_1742	Interzone_strong_active
chr10	15606734	15606825	region_1743	Interzone_strong_active
chr10	15613109	15613163	region_1744	Interzone_strong_active
chr10	15614722	15615628	region_1745	Interzone_strong_active
chr10	15620764	15621189	region_1746	Interzone_strong_active
chr10	15624656	15624912	region_1747	Interzone_strong_active
chr10	15670126	15671509	region_1748	Interzone_strong_active
chr10	15687725	15687979	region_1749	Interzone_strong_active
chr10	15691612	15692155	region_1750	Interzone_strong_active
chr10	15729666	15730492	region_1751	Interzone_strong_active
chr10	15732550	15733093	region_1752	Interzone_strong_active
chr10	15738562	15738786	region_1753	Interzone_strong_active
chr10	15742773	15743103	region_1754	Interzone_strong_active
chr10	15748161	15748694	region_1755	Interzone_strong_active
chr10	15749731	15749875	region_1756	Interzone_strong_active
chr10	15751024	15751768	region_1757	Interzone_strong_active
chr10	15754943	15756819	region_1758	Interzone_strong_active
chr10	15759549	15759949	region_1759	Interzone_strong_active
chr10	15766703	15770095	region_1760	Interzone_strong_active
chr10	15771650	15772492	region_1761	Interzone_strong_active
chr10	15777957	15778345	region_1762	Interzone_strong_active
chr10	15782715	15783529	region_1763	Interzone_strong_active
chr10	15789689	15790116	region_1764	Interzone_strong_active
chr10	15791565	15791924	region_1765	Interzone_strong_active
chr10	15804922	15805378	region_1766	Interzone_strong_active
chr10	15806601	15807271	region_1767	Interzone_strong_active
chr10	15816712	15817152	region_1768	Interzone_strong_active
chr10	15822909	15822966	region_1769	Interzone_strong_active
chr10	15826163	15826532	region_1770	Interzone_strong_active
chr10	15829614	15829954	region_1771	Interzone_strong_active
chr10	15832033	15832346	region_1772	Interzone_strong_active
chr10	15837694	15838736	region_1773	Interzone_strong_active
chr10	15855770	15856674	region_1774	Interzone_strong_active
chr10	15861318	15862272	region_1775	Interzone_strong_active
chr10	15878258	15879008	region_1776	Interzone_strong_active
chr10	15914735	15915224	region_1777	Interzone_strong_active
chr10	15936146	15936653	region_1778	Interzone_strong_active
chr10	15947435	15948936	region_1779	Interzone_strong_active
chr10	15949980	15950407	region_1780	Interzone_strong_active
chr10	15953051	15954052	region_1781	Interzone_strong_active
chr10	15976123	15976277	region_1782	Interzone_strong_active
chr10	15982957	15983607	region_1783	Interzone_strong_active
chr10	15985096	15985417	region_1784	Interzone_strong_active
chr10	16019254	16019798	region_1785	Interzone_strong_active
chr10	16021469	16021476	region_1786	Interzone_strong_active
chr10	16038143	16038723	region_1787	Interzone_strong_active
chr10	16040809	16041295	region_1788	Interzone_strong_active
chr10	16044861	16045608	region_1789	Interzone_strong_active
chr10	16071863	16072559	region_1790	Interzone_strong_active
chr10	16074331	16074846	region_1791	Interzone_strong_active
chr10	16095643	16096068	region_1792	Interzone_strong_active
chr10	16102815	16103418	region_1793	Interzone_strong_active
chr10	16124519	16126314	region_1794	Interzone_strong_active
chr10	16139617	16140517	region_1795	Interzone_strong_active
chr10	16146482	16146522	region_1796	Interzone_strong_active
chr10	16180010	16181610	region_1797	Interzone_strong_active
chr10	16214387	16214550	region_1798	Interzone_strong_active
chr10	16218494	16219138	region_1799	Interzone_strong_active
chr10	16222067	16222728	region_1800	Interzone_strong_active
chr10	16251994	16252664	region_1801	Interzone_strong_active
chr10	16263158	16264394	region_1802	Interzone_strong_active
chr10	16268314	16282086	region_1803	Interzone_strong_active
chr10	16400873	16401777	region_1804	Interzone_strong_active
chr10	16533171	16533693	region_1805	Interzone_strong_active
chr10	16701437	16701980	region_1806	Interzone_strong_active
chr10	16707786	16708562	region_1807	Interzone_strong_active
chr10	16748427	16748999	region_1808	Interzone_strong_active
chr10	16762614	16762883	region_1809	Interzone_strong_active
chr10	16902611	16903083	region_1810	Interzone_strong_active
chr10	16978024	16978859	region_1811	Interzone_strong_active
chr10	17118350	17122821	region_1812	Interzone_strong_active
chr10	17124884	17125160	region_1813	Interzone_strong_active
chr10	17126625	17126996	region_1814	Interzone_strong_active
chr10	17130449	17130717	region_1815	Interzone_strong_active
chr10	17134776	17135065	region_1816	Interzone_strong_active
chr10	17163861	17163898	region_1817	Interzone_strong_active
chr10	17165718	17165967	region_1818	Interzone_strong_active
chr10	17171969	17172407	region_1819	Interzone_strong_active
chr10	17189877	17190092	region_1820	Interzone_strong_active
chr10	17192319	17192909	region_1821	Interzone_strong_active
chr10	17194278	17194712	region_1822	Interzone_strong_active
chr10	17197380	17197571	region_1823	Interzone_strong_active
chr10	17222042	17222258	region_1824	Interzone_strong_active
chr10	17249877	17249956	region_1825	Interzone_strong_active
chr10	17265666	17265820	region_1826	Interzone_strong_active
chr10	17312611	17312716	region_1827	Interzone_strong_active
chr10	17360413	17360762	region_1828	Interzone_strong_active
chr10	17380500	17380878	region_1829	Interzone_strong_active
chr10	17391985	17392420	region_1830	Interzone_strong_active
chr10	17435407	17436369	region_1831	Interzone_strong_active
chr10	17488072	17488236	region_1832	Interzone_strong_active
chr10	17501361	17502010	region_1833	Interzone_strong_active
chr10	17504822	17504892	region_1834	Interzone_strong_active
chr10	17506892	17507553	region_1835	Interzone_strong_active
chr10	17521580	17521779	region_1836	Interzone_strong_active
chr10	17525494	17525777	region_1837	Interzone_strong_active
chr10	17567028	17567291	region_1838	Interzone_strong_active
chr10	17575482	17575645	region_1839	Interzone_strong_active
chr10	17789843	17790044	region_1840	Interzone_strong_active
chr10	17862820	17862891	region_1841	Interzone_strong_active
chr10	17865207	17865221	region_1842	Interzone_strong_active
chr10	17868989	17869176	region_1843	Interzone_strong_active
chr10	17891321	17891424	region_1844	Interzone_strong_active
chr10	17956455	17956563	region_1845	Interzone_strong_active
chr10	17960192	17960382	region_1846	Interzone_strong_active
chr10	17978465	17978552	region_1847	Interzone_strong_active
chr10	17979697	17980027	region_1848	Interzone_strong_active
chr10	17985978	17986499	region_1849	Interzone_strong_active
chr10	18036977	18037494	region_1850	Interzone_strong_active
chr10	18058259	18058518	region_1851	Interzone_strong_active
chr10	18062688	18062832	region_1852	Interzone_strong_active
chr10	18074277	18074461	region_1853	Interzone_strong_active
chr10	18101270	18101949	region_1854	Interzone_strong_active
chr10	18134470	18134542	region_1855	Interzone_strong_active
chr10	18153217	18153346	region_1856	Interzone_strong_active
chr10	18188791	18190057	region_1857	Interzone_strong_active
chr10	18191560	18191602	region_1858	Interzone_strong_active
chr10	18224658	18224832	region_1859	Interzone_strong_active
chr10	18422401	18422425	region_1860	Interzone_strong_active
chr10	18471799	18471849	region_1861	Interzone_strong_active
chr10	18503817	18504178	region_1862	Interzone_strong_active
chr10	18571110	18572052	region_1863	Interzone_strong_active
chr10	18771998	18772044	region_1864	Interzone_strong_active
chr10	18773363	18773390	region_1865	Interzone_strong_active
chr10	18850599	18850913	region_1866	Interzone_strong_active
chr10	18894412	18894433	region_1867	Interzone_strong_active
chr10	18904011	18904132	region_1868	Interzone_strong_active
chr10	18922341	18922582	region_1869	Interzone_strong_active
chr10	18933557	18933704	region_1870	Interzone_strong_active
chr10	18950916	18951113	region_1871	Interzone_strong_active
chr10	19072752	19073074	region_1872	Interzone_strong_active
chr10	19076210	19076432	region_1873	Interzone_strong_active
chr10	19116547	19117842	region_1874	Interzone_strong_active
chr10	19122273	19122904	region_1875	Interzone_strong_active
chr10	19127619	19127805	region_1876	Interzone_strong_active
chr10	19130215	19130624	region_1877	Interzone_strong_active
chr10	19137541	19137807	region_1878	Interzone_strong_active
chr10	19140626	19141983	region_1879	Interzone_strong_active
chr10	19144960	19145408	region_1880	Interzone_strong_active
chr10	19185192	19185815	region_1881	Interzone_strong_active
chr10	19188414	19188553	region_1882	Interzone_strong_active
chr10	19189884	19190743	region_1883	Interzone_strong_active
chr10	19192751	19193371	region_1884	Interzone_strong_active
chr10	19196185	19198253	region_1885	Interzone_strong_active
chr10	19273016	19273155	region_1886	Interzone_strong_active
chr10	19276757	19276830	region_1887	Interzone_strong_active
chr10	19280062	19280363	region_1888	Interzone_strong_active
chr10	19281534	19281921	region_1889	Interzone_strong_active
chr10	19283681	19285089	region_1890	Interzone_strong_active
chr10	19286765	19287042	region_1891	Interzone_strong_active
chr10	19295055	19296336	region_1892	Interzone_strong_active
chr10	19297731	19297861	region_1893	Interzone_strong_active
chr10	19301665	19301713	region_1894	Interzone_strong_active
chr10	19305393	19305597	region_1895	Interzone_strong_active
chr10	19355868	19356413	region_1896	Interzone_strong_active
chr10	19384056	19385326	region_1897	Interzone_strong_active
chr10	19480050	19480431	region_1898	Interzone_strong_active
chr10	19511078	19511420	region_1899	Interzone_strong_active
chr10	19516772	19517005	region_1900	Interzone_strong_active
chr10	19525489	19525567	region_1901	Interzone_strong_active
chr10	19550178	19550362	region_1902	Interzone_strong_active
chr10	19553786	19554506	region_1903	Interzone_strong_active
chr10	19566902	19567135	region_1904	Interzone_strong_active
chr10	19568282	19568307	region_1905	Interzone_strong_active
chr10	19571801	19571831	region_1906	Interzone_strong_active
chr10	19573893	19574372	region_1907	Interzone_strong_active
chr10	19575521	19576897	region_1908	Interzone_strong_active
chr10	19581191	19581351	region_1909	Interzone_strong_active
chr10	19596047	19596165	region_1910	Interzone_strong_active
chr10	19598335	19598898	region_1911	Interzone_strong_active
chr10	19622702	19622898	region_1912	Interzone_strong_active
chr10	19694807	19695249	region_1913	Interzone_strong_active
chr10	19728944	19729124	region_1914	Interzone_strong_active
chr10	19772093	19772211	region_1915	Interzone_strong_active
chr10	19812706	19814499	region_1916	Interzone_strong_active
chr10	19823309	19823708	region_1917	Interzone_strong_active
chr10	19846063	19846724	region_1918	Interzone_strong_active
chr10	19852229	19853750	region_1919	Interzone_strong_active
chr10	19863925	19865267	region_1920	Interzone_strong_active
chr10	19906712	19906815	region_1921	Interzone_strong_active
chr10	19910435	19912073	region_1922	Interzone_strong_active
chr10	19922049	19924132	region_1923	Interzone_strong_active
chr10	19927407	19928631	region_1924	Interzone_strong_active
chr10	19930086	19930181	region_1925	Interzone_strong_active
chr10	19931715	19934715	region_1926	Interzone_strong_active
chr10	19937472	19937742	region_1927	Interzone_strong_active
chr10	20038355	20039336	region_1928	Interzone_strong_active
chr10	20068385	20068439	region_1929	Interzone_strong_active
chr10	20111162	20111206	region_1930	Interzone_strong_active
chr10	20131702	20131887	region_1931	Interzone_strong_active
chr10	20134261	20134643	region_1932	Interzone_strong_active
chr10	20139924	20140094	region_1933	Interzone_strong_active
chr10	20142412	20142909	region_1934	Interzone_strong_active
chr10	20149087	20149321	region_1935	Interzone_strong_active
chr10	20172915	20173143	region_1936	Interzone_strong_active
chr10	20212943	20214844	region_1937	Interzone_strong_active
chr10	20367804	20368458	region_1938	Interzone_strong_active
chr10	20423940	20423973	region_1939	Interzone_strong_active
chr10	20440251	20442420	region_1940	Interzone_strong_active
chr10	20444496	20445600	region_1941	Interzone_strong_active
chr10	20447079	20447178	region_1942	Interzone_strong_active
chr10	20450853	20451480	region_1943	Interzone_strong_active
chr10	20452721	20452881	region_1944	Interzone_strong_active
chr10	20454640	20455307	region_1945	Interzone_strong_active
chr10	20460629	20462690	region_1946	Interzone_strong_active
chr10	20466818	20467009	region_1947	Interzone_strong_active
chr10	20468234	20468683	region_1948	Interzone_strong_active
chr10	20471018	20471738	region_1949	Interzone_strong_active
chr10	20473496	20478149	region_1950	Interzone_strong_active
chr10	20481835	20482550	region_1951	Interzone_strong_active
chr10	20483807	20484903	region_1952	Interzone_strong_active
chr10	20501579	20502214	region_1953	Interzone_strong_active
chr10	20515967	20516090	region_1954	Interzone_strong_active
chr10	20517621	20519479	region_1955	Interzone_strong_active
chr10	20523672	20523787	region_1956	Interzone_strong_active
chr10	20542489	20543169	region_1957	Interzone_strong_active
chr10	20544868	20546052	region_1958	Interzone_strong_active
chr10	20552225	20553204	region_1959	Interzone_strong_active
chr10	20568529	20570212	region_1960	Interzone_strong_active
chr10	20581719	20581860	region_1961	Interzone_strong_active
chr10	20585845	20585903	region_1962	Interzone_strong_active
chr10	20638916	20638967	region_1963	Interzone_strong_active
chr10	20693135	20693702	region_1964	Interzone_strong_active
chr11	239329	239389	region_1965	Interzone_strong_active
chr11	360942	361494	region_1966	Interzone_strong_active
chr11	442820	442969	region_1967	Interzone_strong_active
chr11	444287	445318	region_1968	Interzone_strong_active
chr11	452306	452421	region_1969	Interzone_strong_active
chr11	454913	455120	region_1970	Interzone_strong_active
chr11	467910	468031	region_1971	Interzone_strong_active
chr11	471291	471484	region_1972	Interzone_strong_active
chr11	473105	473604	region_1973	Interzone_strong_active
chr11	483352	489998	region_1974	Interzone_strong_active
chr11	551507	551736	region_1975	Interzone_strong_active
chr11	554761	554806	region_1976	Interzone_strong_active
chr11	558547	560516	region_1977	Interzone_strong_active
chr11	576737	576905	region_1978	Interzone_strong_active
chr11	597985	598905	region_1979	Interzone_strong_active
chr11	604592	605350	region_1980	Interzone_strong_active
chr11	606888	608092	region_1981	Interzone_strong_active
chr11	617993	618989	region_1982	Interzone_strong_active
chr11	706813	707433	region_1983	Interzone_strong_active
chr11	766699	766776	region_1984	Interzone_strong_active
chr11	981126	981689	region_1985	Interzone_strong_active
chr11	1005927	1008065	region_1986	Interzone_strong_active
chr11	1014836	1014944	region_1987	Interzone_strong_active
chr11	1015953	1016157	region_1988	Interzone_strong_active
chr11	1108650	1108954	region_1989	Interzone_strong_active
chr11	1152346	1152783	region_1990	Interzone_strong_active
chr11	1156255	1156286	region_1991	Interzone_strong_active
chr11	1184757	1184807	region_1992	Interzone_strong_active
chr11	1190107	1190315	region_1993	Interzone_strong_active
chr11	1194324	1194673	region_1994	Interzone_strong_active
chr11	1199681	1199753	region_1995	Interzone_strong_active
chr11	1200812	1201193	region_1996	Interzone_strong_active
chr11	1310874	1311107	region_1997	Interzone_strong_active
chr11	1401951	1401990	region_1998	Interzone_strong_active
[truncated: 62,872 more rows]

## Sheet: Supplementary_Table_4_
#Supplementary_Table_4_Functionaly_validated_CEs
chr_gg6	start_gg6	end_gg6	chicken_CE_ID	VISTA_enh_ID	activity	Bracketing_genes
chr1	7597142	7598434	region_68_Interzone_strong_active	VISTA_enhancer_mm418	enhancer_in:_other[11/15]	FRMD4A(intragenic)
chr1	8923855	8924000	region_75_Interzone_strong_active	VISTA_enhancer_mm832	enhancer_in:_branchial_arch[10/12]_|_nose[10/12]_|_ear[10/12]	SEMA3D(intragenic)
chr1	50743962	50744590	region_395_Interzone_strong_active	VISTA_enhancer_mm570	enhancer_in:_other[4/5]	CBX7-PDGFB
chr1	84421634	84424641	region_780_Interzone_strong_active	VISTA_enhancer_mm1504	enhancer_in:_neural_tube[4/5]_|_hindbrain_(rhombencephalon)[4/5]_|_midbrain_(mesencephalon)[4/5]_|_forebrain[4/5]	BOC(intragenic)
chr1	154269269	154269553	region_1152_Interzone_strong_active	VISTA_enhancer_mm1112	enhancer_in:_limb[8/11]_|_branchial_arch[9/11]_|_other[8/11]	NDFIP2-LINC01080
chr1	190280838	190282394	region_1361_Interzone_strong_active	VISTA_enhancer_mm1534	enhancer_in:_neural_tube[5/5]_|_hindbrain_(rhombencephalon)[4/5]_|_forebrain[5/5]_|_limb[4/5]	FAM181B-PRCP
chr10	4632785	4634813	region_1566_Interzone_strong_active	VISTA_enhancer_mm100	enhancer_in:_heart[6/9]	TPM1(intragenic)
chr10	19137541	19137807	region_1878_Interzone_strong_active	VISTA_enhancer_mm1518	enhancer_in:_limb[6/8]	SMAD6(intragenic)
chr11	19302109	19302607	region_2314_Interzone_strong_active	VISTA_enhancer_mm1540	enhancer_in:_hindbrain_(rhombencephalon)[3/5]	LOC100506172-LOC101928035
chr12	16005112	16006081	region_2651_Interzone_strong_active	VISTA_enhancer_mm60	enhancer_in:_branchial_arch[6/6]	LINC01212-FOXP1
chr15	7643977	7644332	region_3549_Interzone_strong_active	VISTA_enhancer_mm921	enhancer_in:_facial_mesenchyme[6/6]_|_other[6/6]	LOC101929539-MN1
chr18	1917365	1917603	region_4106_Interzone_strong_active	VISTA_enhancer_mm213	enhancer_in:_somite[4/4]_|_heart[4/4]	MYH10-CCDC42
chr18	4339822	4340140	region_4161_Interzone_strong_active	VISTA_enhancer_mm1451	enhancer_in:_neural_tube[10/10]_|_hindbrain_(rhombencephalon)[10/10]_|_midbrain_(mesencephalon)[10/10]_|_forebrain[9/10]_|_cranial_nerve[5/10]	CRYBA4-MIAT
chr18	8342777	8343294	region_4259_Interzone_strong_active	VISTA_enhancer_mm628	enhancer_in:_branchial_arch[4/8]	KCNJ2-CASC17
chr18	8850791	8851177	region_4308_Interzone_strong_active	VISTA_enhancer_mm636	enhancer_in:_limb[6/9]_|_branchial_arch[3/9]_|_nose[4/9]	SOX9-LINC00673
chr18	9012958	9015891	region_4318_Interzone_strong_active	VISTA_enhancer_mm1462	enhancer_in:_neural_tube[9/12]_|_hindbrain_(rhombencephalon)[9/12]_|_midbrain_(mesencephalon)[8/12]_|_dorsal_root_ganglion[7/12]_|_forebrain[7/12]_|_limb[7/12]_|_trigeminal_V_(ganglion,_cranial)[7/12]	SDK2(intragenic)
chr19	7509667	7510615	region_4701_Interzone_strong_active	VISTA_enhancer_mm127	enhancer_in:_heart[3/6]	VMP1(intragenic)
chr2	23554534	23555250	region_5020_Interzone_strong_active	VISTA_enhancer_mm398	enhancer_in:_limb[5/6]	BET1-COL1A2
chr2	50731869	50732424	region_5393_Interzone_strong_active	VISTA_enhancer_mm652	enhancer_in:_dorsal_root_ganglion[4/7]_|_cranial_nerve[6/7]_|_heart[6/7]	GLI3(intragenic)
chr2	58763350	58764655	region_5457_Interzone_strong_active	VISTA_enhancer_mm265	enhancer_in:_neural_tube[7/8]_|_blood_vessels[3/8]	CASC15(intragenic)
chr2	108177408	108177966	region_5805_Interzone_strong_active	VISTA_enhancer_mm467	enhancer_in:_limb[4/10]	UBE2V2-LOC101929268
chr2	108255744	108257164	region_5810_Interzone_strong_active	VISTA_enhancer_mm466	enhancer_in:_hindbrain_(rhombencephalon)[5/10]_|_limb[10/10]_|_branchial_arch[6/10]_|_nose[6/10]_|_tail[8/10]	LOC101929268(intragenic)
chr2	119386228	119389269	region_5893_Interzone_strong_active	VISTA_enhancer_mm1577	enhancer_in:_hindbrain_(rhombencephalon)[8/10]_|_branchial_arch[4/10]	ZFHX4(intragenic)
chr2	119415472	119417757	region_5895_Interzone_strong_active	VISTA_enhancer_mm1541	enhancer_in:_neural_tube[6/7]_|_forebrain[6/7]	ZFHX4(intragenic)
chr2	127901435	127902792	region_5990_Interzone_strong_active	VISTA_enhancer_mm703	enhancer_in:_limb[6/6]	VPS13B-MIR599
chr20	5853288	5853377	region_6285_Interzone_strong_active	VISTA_enhancer_mm1346	enhancer_in:_midbrain_(mesencephalon)[4/5]	NCOA3(intragenic)
chr21	1123047	1125278	region_6500_Interzone_strong_active	VISTA_enhancer_mm1087	enhancer_in:_neural_tube[5/7]_|_hindbrain_(rhombencephalon)[5/7]_|_midbrain_(mesencephalon)[5/7]_|_forebrain[5/7]_|_limb[5/7]	MIR4251-ARHGEF16
chr21	1287621	1288083	region_6528_Interzone_strong_active	VISTA_enhancer_mm1492	enhancer_in:_limb[5/5]_|_facial_mesenchyme[5/5]	TTC34-ACTRT2
chr21	1322369	1322998	region_6536_Interzone_strong_active	VISTA_enhancer_mm1088	enhancer_in:_forebrain[4/7]_|_limb[7/7]_|_branchial_arch[6/7]	TTC34-ACTRT2
chr21	1351428	1352131	region_6541_Interzone_strong_active	VISTA_enhancer_mm1090	enhancer_in:_limb[5/8]_|_branchial_arch[8/8]_|_nose[8/8]_|_facial_mesenchyme[8/8]	TTC34-ACTRT2
chr21	1782349	1782511	region_6556_Interzone_strong_active	VISTA_enhancer_mm318	enhancer_in:_heart[6/6]	C1orf86-SKI
chr22	2453973	2455342	region_6839_Interzone_strong_active	VISTA_enhancer_mm1598	enhancer_in:_hindbrain_(rhombencephalon)[3/6]_|_somite[3/6]_|_midbrain_(mesencephalon)[3/6]_|_forebrain[3/6]_|_limb[3/6]_|_nose[3/6]_|_other[3/6]	KCNU1-ZNF703
chr22	2658095	2658411	region_6859_Interzone_strong_active	VISTA_enhancer_mm612	enhancer_in:_hindbrain_(rhombencephalon)[9/11]_|_midbrain_(mesencephalon)[9/11]_|_forebrain[11/11]_|_limb[10/11]_|_branchial_arch[8/11]_|_eye[11/11]_|_nose[4/11]	FGFR1(intragenic)
chr22	2685397	2686952	region_6862_Interzone_strong_active	VISTA_enhancer_mm610	enhancer_in:_limb[3/5]_|_branchial_arch[3/5]_|_facial_mesenchyme[4/5]_|_other[4/5]	RNF5P1-TACC1
chr24	3514736	3515142	region_7308_Interzone_strong_active	VISTA_enhancer_mm1493	enhancer_in:_limb[4/7]_|_eye[5/7]	SORL1-MIR100HG
chr26	244414	247132	region_7649_Interzone_strong_active	VISTA_enhancer_mm755	enhancer_in:_hindbrain_(rhombencephalon)[8/17]_|_limb[5/17]_|_facial_mesenchyme[8/17]	NA
chr26	4817264	4818449	region_7821_Interzone_strong_active	VISTA_enhancer_mm751	enhancer_in:_forebrain[3/5]_|_limb[4/5]_|_branchial_arch[5/5]_|_facial_mesenchyme[5/5]	NCR2-FOXP4
chr28	2451604	2451704	region_8222_Interzone_strong_active	VISTA_enhancer_mm971	enhancer_in:_neural_tube[3/4]_|_hindbrain_(rhombencephalon)[3/4]_|_forebrain[4/4]	PLEKHA6-LINC00628
chr3	930875	932630	region_8404_Interzone_strong_active	VISTA_enhancer_mm57	enhancer_in:_limb[5/8]_|_branchial_arch[5/8]_|_eye[4/8]_|_tail[4/8]	VRK2(intragenic)
chr3	22771400	22772329	region_8687_Interzone_strong_active	VISTA_enhancer_mm646	enhancer_in:_somite[7/13]_|_forebrain[6/13]_|_limb[8/13]_|_branchial_arch[8/13]_|_nose[10/13]_|_facial_mesenchyme[10/13]	SERTAD4-HHAT
chr3	25228626	25230255	region_8710_Interzone_strong_active	VISTA_enhancer_mm1109	enhancer_in:_limb[8/9]	THADA(intragenic)
chr3	38421800	38423689	region_8821_Interzone_strong_active	VISTA_enhancer_mm1295	enhancer_in:_forebrain[6/9]	LINC00184-TOMM20
chr3	60008644	60009056	region_9037_Interzone_strong_active	VISTA_enhancer_mm766	enhancer_in:_heart[3/3]	HDDC2-LOC643623
chr3	61621109	61621372	region_9044_Interzone_strong_active	VISTA_enhancer_mm74	enhancer_in:_heart[4/6]	GJA1-HSF2
chr3	75266836	75268299	region_9104_Interzone_strong_active	VISTA_enhancer_mm720	enhancer_in:_hindbrain_(rhombencephalon)[5/11]_|_somite[6/11]_|_dorsal_root_ganglion[6/11]_|_trigeminal_V_(ganglion,_cranial)[6/11]_|_cranial_nerve[6/11]	BACH2(intragenic)
chr3	75375102	75376106	region_9107_Interzone_strong_active	VISTA_enhancer_mm510	enhancer_in:_neural_tube[4/5]_|_hindbrain_(rhombencephalon)[4/5]	BACH2(intragenic)
chr3	109433099	109434843	region_9359_Interzone_strong_active	VISTA_enhancer_mm924	enhancer_in:_branchial_arch[6/8]_|_facial_mesenchyme[6/8]	RUNX2(intragenic)
chr30	165559	165909	region_9376_Interzone_strong_active	VISTA_enhancer_mm1451	enhancer_in:_neural_tube[10/10]_|_hindbrain_(rhombencephalon)[10/10]_|_midbrain_(mesencephalon)[10/10]_|_forebrain[9/10]_|_cranial_nerve[5/10]	CRYBA4-MIAT
chr33	7577493	7578597	region_9731_Interzone_strong_active	VISTA_enhancer_mm1417	enhancer_in:_limb[5/5]_|_tail[5/5]	HOXC11-HOXC10
chr4	385789	387114	region_9745_Interzone_strong_active	VISTA_enhancer_mm7	enhancer_in:_forebrain[6/6]	TNFRSF19(intragenic)
chr4	49689735	49691208	region_10266_Interzone_strong_active	VISTA_enhancer_mm39	enhancer_in:_nose[14/14]	SEPT11(intragenic)
chr4	78631257	78631544	region_10583_Interzone_strong_active	VISTA_enhancer_mm1165	enhancer_in:_branchial_arch[5/7]_|_nose[6/7]_|_facial_mesenchyme[6/7]	STX18(intragenic)
chr4	78804218	78804593	region_10587_Interzone_strong_active	VISTA_enhancer_mm426	enhancer_in:_hindbrain_(rhombencephalon)[7/9]_|_somite[7/9]_|_midbrain_(mesencephalon)[9/9]_|_limb[9/9]_|_branchial_arch[7/9]_|_eye[5/9]_|_nose[9/9]_|_genital_tubercle[5/9]_|_facial_mesenchyme[8/9]_|_ear[3/9]	STX18-AS1-MSX1
chr4	85329943	85330349	region_10618_Interzone_strong_active	VISTA_enhancer_mm123	enhancer_in:_neural_tube[9/11]_|_limb[7/11]_|_nose[7/11]_|_heart[5/11]	ATOH8(intragenic)
chr5	3122309	3122863	region_10755_Interzone_strong_active	VISTA_enhancer_mm683	enhancer_in:_hindbrain_(rhombencephalon)[10/16]_|_midbrain_(mesencephalon)[14/16]_|_forebrain[13/16]_|_eye[9/16]	SLC17A6-FANCF
chr5	17430332	17431115	region_10969_Interzone_strong_active	VISTA_enhancer_mm1497	enhancer_in:_neural_tube[5/6]_|_hindbrain_(rhombencephalon)[5/6]_|_midbrain_(mesencephalon)[6/6]_|_forebrain[6/6]_|_limb[4/6]_|_heart[4/6]	LOC338694(intragenic)
chr5	58814995	58815319	region_11483_Interzone_strong_active	VISTA_enhancer_mm387	enhancer_in:_branchial_arch[11/12]_|_nose[11/12]_|_facial_mesenchyme[11/12]	BMP4-CDKN3
chr6	13697672	13698155	region_11648_Interzone_strong_active	VISTA_enhancer_mm1446	enhancer_in:_neural_tube[3/4]_|_hindbrain_(rhombencephalon)[3/4]_|_midbrain_(mesencephalon)[3/4]_|_forebrain[3/4]_|_eye[3/4]	LINC00595-ZMIZ1-AS1
chr6	30497768	30498085	region_11872_Interzone_strong_active	VISTA_enhancer_mm449	enhancer_in:_forebrain[3/5]_|_limb[3/5]	CASC2-FAM204A
chr6	31990754	31991669	region_11905_Interzone_strong_active	VISTA_enhancer_mm938	enhancer_in:_limb[8/9]_|_eye[8/9]_|_tail[7/9]_|_other[8/9]	ATE1(intragenic)
chr6	34683184	34684108	region_11957_Interzone_strong_active	VISTA_enhancer_mm1574	enhancer_in:_limb[3/5]	MKI67-MGMT
chr7	6245266	6245508	region_12079_Interzone_strong_active	VISTA_enhancer_mm901	enhancer_in:_branchial_arch[5/5]	MIR4441-MGC16025
chr7	13286523	13286804	region_12188_Interzone_strong_active	VISTA_enhancer_mm1601	enhancer_in:_facial_mesenchyme[3/5]	ICOS-PARD3B
chr7	21738909	21739215	region_12300_Interzone_strong_active	VISTA_enhancer_mm1564	enhancer_in:_limb[5/6]_|_branchial_arch[4/6]	RBMS1(intragenic)
chr7	27819030	27819189	region_12408_Interzone_strong_active	VISTA_enhancer_mm268	enhancer_in:_other[6/7]	KALRN-UMPS
chr8	4960577	4962364	region_12615_Interzone_strong_active	VISTA_enhancer_mm712	enhancer_in:_somite[4/4]_|_limb[4/4]	MIR199A2-C1orf105
chr8	26809025	26809239	region_13018_Interzone_strong_active	VISTA_enhancer_mm308	enhancer_in:_heart[4/7]	LOC101926925(intragenic)
chrZ	245345	246834	region_13667_Interzone_strong_active	VISTA_enhancer_mm708	enhancer_in:_limb[6/6]	LOC100505474(intragenic)
chrZ	14018854	14019161	region_13788_Interzone_strong_active	VISTA_enhancer_mm917	enhancer_in:_dorsal_root_ganglion[5/6]_|_limb[5/6]	FGF10(intragenic)
chrZ	35760540	35760875	region_13956_Interzone_strong_active	VISTA_enhancer_mm269	enhancer_in:_eye[5/5]_|_heart[3/5]_|_other[3/5]	ZFAND5(intragenic)
chrZ	79514093	79515060	region_14180_Interzone_strong_active	VISTA_enhancer_mm1061	enhancer_in:_limb[12/14]_|_branchial_arch[5/14]_|_nose[10/14]	LOC101927421-LOC101927460
chr1	7597142	7598434	region_64_Phalange_strong_active	VISTA_enhancer_mm418	enhancer_in:_other[11/15]	FRMD4A(intragenic)
chr1	8923855	8924000	region_73_Phalange_strong_active	VISTA_enhancer_mm832	enhancer_in:_branchial_arch[10/12]_|_nose[10/12]_|_ear[10/12]	SEMA3D(intragenic)
chr1	50743962	50744590	region_409_Phalange_strong_active	VISTA_enhancer_mm570	enhancer_in:_other[4/5]	CBX7-PDGFB
chr1	84421634	84424641	region_810_Phalange_strong_active	VISTA_enhancer_mm1504	enhancer_in:_neural_tube[4/5]_|_hindbrain_(rhombencephalon)[4/5]_|_midbrain_(mesencephalon)[4/5]_|_forebrain[4/5]	BOC(intragenic)
chr1	154269269	154269809	region_1212_Phalange_strong_active	VISTA_enhancer_mm1112	enhancer_in:_limb[8/11]_|_branchial_arch[9/11]_|_other[8/11]	NDFIP2-LINC01080
chr1	190280838	190282394	region_1432_Phalange_strong_active	VISTA_enhancer_mm1534	enhancer_in:_neural_tube[5/5]_|_hindbrain_(rhombencephalon)[4/5]_|_forebrain[5/5]_|_limb[4/5]	FAM181B-PRCP
chr10	4632785	4634813	region_1632_Phalange_strong_active	VISTA_enhancer_mm100	enhancer_in:_heart[6/9]	TPM1(intragenic)
chr10	19137541	19137807	region_1920_Phalange_strong_active	VISTA_enhancer_mm1518	enhancer_in:_limb[6/8]	SMAD6(intragenic)
chr12	16005112	16006081	region_2645_Phalange_strong_active	VISTA_enhancer_mm60	enhancer_in:_branchial_arch[6/6]	LINC01212-FOXP1
chr15	7643977	7644332	region_3579_Phalange_strong_active	VISTA_enhancer_mm921	enhancer_in:_facial_mesenchyme[6/6]_|_other[6/6]	LOC101929539-MN1
chr18	1917365	1917603	region_4106_Phalange_strong_active	VISTA_enhancer_mm213	enhancer_in:_somite[4/4]_|_heart[4/4]	MYH10-CCDC42
chr18	8342777	8343167	region_4273_Phalange_strong_active	VISTA_enhancer_mm628	enhancer_in:_branchial_arch[4/8]	KCNJ2-CASC17
chr18	9012958	9015891	region_4354_Phalange_strong_active	VISTA_enhancer_mm1462	enhancer_in:_neural_tube[9/12]_|_hindbrain_(rhombencephalon)[9/12]_|_midbrain_(mesencephalon)[8/12]_|_dorsal_root_ganglion[7/12]_|_forebrain[7/12]_|_limb[7/12]_|_trigeminal_V_(ganglion,_cranial)[7/12]	SDK2(intragenic)
chr19	7509667	7510615	region_4720_Phalange_strong_active	VISTA_enhancer_mm127	enhancer_in:_heart[3/6]	VMP1(intragenic)
chr2	23554534	23555250	region_5089_Phalange_strong_active	VISTA_enhancer_mm398	enhancer_in:_limb[5/6]	BET1-COL1A2
chr2	31975746	31976063	region_5205_Phalange_strong_active	VISTA_enhancer_mm406	enhancer_in:_limb[5/5]_|_facial_mesenchyme[5/5]	NPVF-RNU6-16P
chr2	58763475	58764475	region_5519_Phalange_strong_active	VISTA_enhancer_mm265	enhancer_in:_neural_tube[7/8]_|_blood_vessels[3/8]	CASC15(intragenic)
chr2	61994744	61995409	region_5553_Phalange_strong_active	VISTA_enhancer_mm132	enhancer_in:_somite[6/7]_|_midbrain_(mesencephalon)[6/7]_|_branchial_arch[5/7]_|_eye[6/7]_|_heart[7/7]	CAP2(intragenic)
chr2	108177408	108177966	region_5861_Phalange_strong_active	VISTA_enhancer_mm467	enhancer_in:_limb[4/10]	UBE2V2-LOC101929268
chr2	108255744	108257164	region_5865_Phalange_strong_active	VISTA_enhancer_mm466	enhancer_in:_hindbrain_(rhombencephalon)[5/10]_|_limb[10/10]_|_branchial_arch[6/10]_|_nose[6/10]_|_tail[8/10]	LOC101929268(intragenic)
chr2	119386640	119387745	region_5949_Phalange_strong_active	VISTA_enhancer_mm1577	enhancer_in:_hindbrain_(rhombencephalon)[8/10]_|_branchial_arch[4/10]	ZFHX4(intragenic)
chr2	119415472	119417049	region_5950_Phalange_strong_active	VISTA_enhancer_mm1541	enhancer_in:_neural_tube[6/7]_|_forebrain[6/7]	ZFHX4(intragenic)
chr2	127901435	127902792	region_6052_Phalange_strong_active	VISTA_enhancer_mm703	enhancer_in:_limb[6/6]	VPS13B-MIR599
chr20	5853288	5853362	region_6341_Phalange_strong_active	VISTA_enhancer_mm1346	enhancer_in:_midbrain_(mesencephalon)[4/5]	NCOA3(intragenic)
chr21	1123047	1125278	region_6572_Phalange_strong_active	VISTA_enhancer_mm1087	enhancer_in:_neural_tube[5/7]_|_hindbrain_(rhombencephalon)[5/7]_|_midbrain_(mesencephalon)[5/7]_|_forebrain[5/7]_|_limb[5/7]	MIR4251-ARHGEF16
chr21	1287621	1288083	region_6601_Phalange_strong_active	VISTA_enhancer_mm1492	enhancer_in:_limb[5/5]_|_facial_mesenchyme[5/5]	TTC34-ACTRT2
chr21	1322369	1322998	region_6609_Phalange_strong_active	VISTA_enhancer_mm1088	enhancer_in:_forebrain[4/7]_|_limb[7/7]_|_branchial_arch[6/7]	TTC34-ACTRT2
chr21	1351428	1352131	region_6614_Phalange_strong_active	VISTA_enhancer_mm1090	enhancer_in:_limb[5/8]_|_branchial_arch[8/8]_|_nose[8/8]_|_facial_mesenchyme[8/8]	TTC34-ACTRT2
chr21	1782349	1782511	region_6628_Phalange_strong_active	VISTA_enhancer_mm318	enhancer_in:_heart[6/6]	C1orf86-SKI
chr22	2658095	2658411	region_6924_Phalange_strong_active	VISTA_enhancer_mm612	enhancer_in:_hindbrain_(rhombencephalon)[9/11]_|_midbrain_(mesencephalon)[9/11]_|_forebrain[11/11]_|_limb[10/11]_|_branchial_arch[8/11]_|_eye[11/11]_|_nose[4/11]	FGFR1(intragenic)
chr22	2685397	2686952	region_6927_Phalange_strong_active	VISTA_enhancer_mm610	enhancer_in:_limb[3/5]_|_branchial_arch[3/5]_|_facial_mesenchyme[4/5]_|_other[4/5]	RNF5P1-TACC1
chr24	3514736	3515142	region_7370_Phalange_strong_active	VISTA_enhancer_mm1493	enhancer_in:_limb[4/7]_|_eye[5/7]	SORL1-MIR100HG
chr26	244414	247132	region_7676_Phalange_strong_active	VISTA_enhancer_mm755	enhancer_in:_hindbrain_(rhombencephalon)[8/17]_|_limb[5/17]_|_facial_mesenchyme[8/17]	NA
chr26	4817264	4818449	region_7848_Phalange_strong_active	VISTA_enhancer_mm751	enhancer_in:_forebrain[3/5]_|_limb[4/5]_|_branchial_arch[5/5]_|_facial_mesenchyme[5/5]	NCR2-FOXP4
chr28	2451604	2451704	region_8230_Phalange_strong_active	VISTA_enhancer_mm971	enhancer_in:_neural_tube[3/4]_|_hindbrain_(rhombencephalon)[3/4]_|_forebrain[4/4]	PLEKHA6-LINC00628
chr3	931215	931656	region_8407_Phalange_strong_active	VISTA_enhancer_mm57	enhancer_in:_limb[5/8]_|_branchial_arch[5/8]_|_eye[4/8]_|_tail[4/8]	VRK2(intragenic)
chr3	22771400	22772329	region_8672_Phalange_strong_active	VISTA_enhancer_mm646	enhancer_in:_somite[7/13]_|_forebrain[6/13]_|_limb[8/13]_|_branchial_arch[8/13]_|_nose[10/13]_|_facial_mesenchyme[10/13]	SERTAD4-HHAT
chr3	25228626	25231038	region_8691_Phalange_strong_active	VISTA_enhancer_mm1109	enhancer_in:_limb[8/9]	THADA(intragenic)
chr3	38421800	38423689	region_8794_Phalange_strong_active	VISTA_enhancer_mm1295	enhancer_in:_forebrain[6/9]	LINC00184-TOMM20
chr3	60008644	60009056	region_9025_Phalange_strong_active	VISTA_enhancer_mm766	enhancer_in:_heart[3/3]	HDDC2-LOC643623
chr3	61621109	61621372	region_9028_Phalange_strong_active	VISTA_enhancer_mm74	enhancer_in:_heart[4/6]	GJA1-HSF2
chr3	75266836	75268299	region_9094_Phalange_strong_active	VISTA_enhancer_mm720	enhancer_in:_hindbrain_(rhombencephalon)[5/11]_|_somite[6/11]_|_dorsal_root_ganglion[6/11]_|_trigeminal_V_(ganglion,_cranial)[6/11]_|_cranial_nerve[6/11]	BACH2(intragenic)
chr3	75375102	75375487	region_9097_Phalange_strong_active	VISTA_enhancer_mm510	enhancer_in:_neural_tube[4/5]_|_hindbrain_(rhombencephalon)[4/5]	BACH2(intragenic)
chr3	109364957	109365735	region_9357_Phalange_strong_active	VISTA_enhancer_mm657	enhancer_in:_branchial_arch[3/6]	RUNX2(intragenic)
chr3	109432790	109434912	region_9369_Phalange_strong_active	VISTA_enhancer_mm924	enhancer_in:_branchial_arch[6/8]_|_facial_mesenchyme[6/8]	RUNX2(intragenic)
chr30	165559	165909	region_9398_Phalange_strong_active	VISTA_enhancer_mm1451	enhancer_in:_neural_tube[10/10]_|_hindbrain_(rhombencephalon)[10/10]_|_midbrain_(mesencephalon)[10/10]_|_forebrain[9/10]_|_cranial_nerve[5/10]	CRYBA4-MIAT
chr33	7577371	7578597	region_9751_Phalange_strong_active	VISTA_enhancer_mm1417	enhancer_in:_limb[5/5]_|_tail[5/5]	HOXC11-HOXC10
chr4	385807	387252	region_9763_Phalange_strong_active	VISTA_enhancer_mm7	enhancer_in:_forebrain[6/6]	TNFRSF19(intragenic)
chr4	49689735	49691208	region_10270_Phalange_strong_active	VISTA_enhancer_mm39	enhancer_in:_nose[14/14]	SEPT11(intragenic)
[truncated: 340 more rows]

## Sheet: Supplementary_Table_5_
#Supplementary_Table_5_Interzone/Phalange_specific_CEs
chr	start	end	CE_ID
[truncated: 6,813 more rows]

## Sheet: Supplementary_Table_6_
#Supplementary_Table_6_CEs_changing_enhancer_state_between_interzone_and_phalange
[truncated: 3,614 more rows]

[truncated: 2 more sheets: Supplementary_Table_7_, Supplementary_Table_8]
